# Supplementary material for: Semen quality and seminal plasma metabolites in male rabbits (Oryctolagus Cuniculus) under heat stress
Source: PeerJ journal article supplement (doi:10.7717/peerj.15112), 2023-04-07

## Lipidmaps annotation

### Fatty Acyls [FA]

Octadecanoids [FA02]

Fatty amides [FA08]

Fatty Acids and Conjugates [FA01]

Eicosanoids [FA03]

Docosanoids [FA04]

### Glycerophospholipids [GP]

Glycerophosphoserines [GP03]

Glycerophosphoethanolamines [GP02]

Glycerophosphocholines [GP01]

### Polyketides [PR]

Flavonoids [PK12]

### Sterols [ST]

Bile acids and derivatives [ST04]

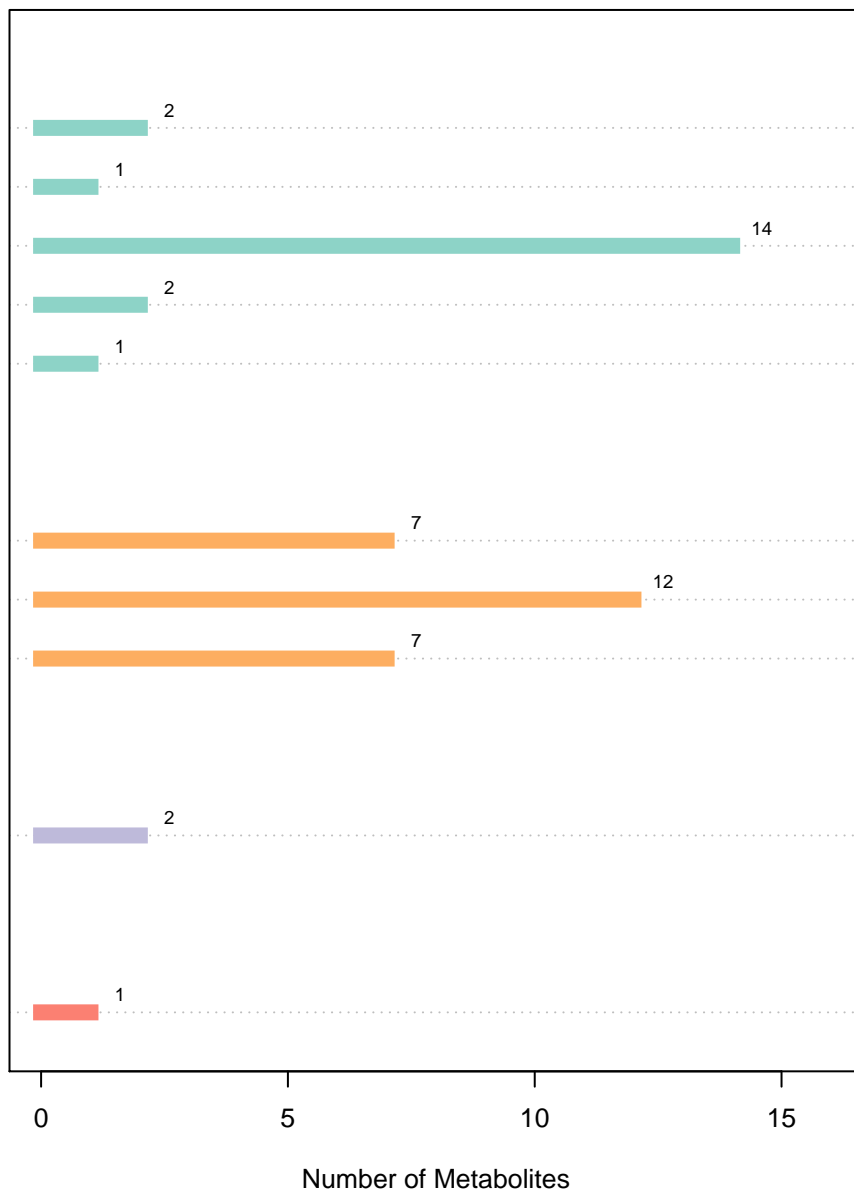

Supplement: RawDataResult.zip [file RawDataResult.zip]
