# Supplementary material for: Semen quality and seminal plasma metabolites in male rabbits (Oryctolagus Cuniculus) under heat stress
Source: PeerJ journal article supplement (doi:10.7717/peerj.15112), 2023-04-07

## HMDB annotation

HMDB

Organic nitrogen compounds

1

Phenylpropanoids and polyketides

6

Nucleosides, nucleotides, and analogues

11

Benzenoids

13

Organic oxygen compounds

14

Organoheterocyclic compounds

18

Organic acids and derivatives

30

Lipids and lipid-like molecules

37

0 10 20 30 40

Number of Metabolites

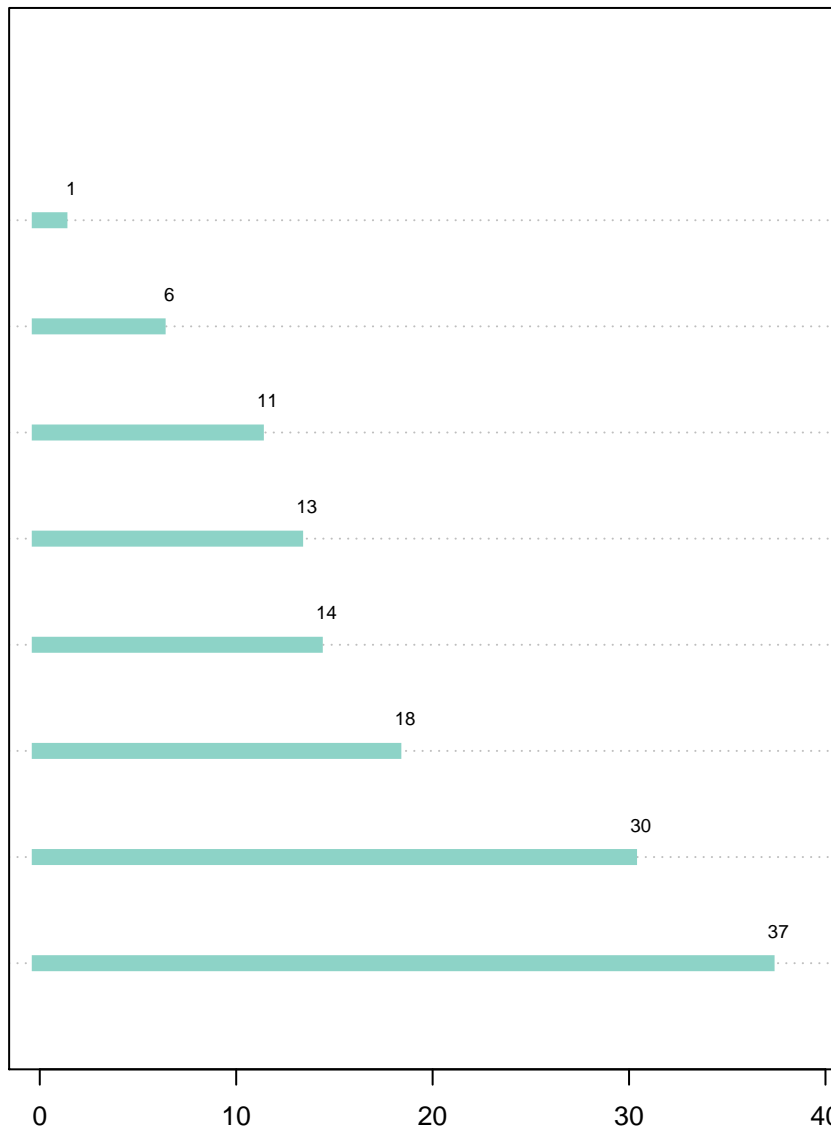

Supplement: RawDataResult.zip [file RawDataResult.zip]
