# Supplementary material for: Semen quality and seminal plasma metabolites in male rabbits (Oryctolagus Cuniculus) under heat stress
Source: PeerJ journal article supplement (doi:10.7717/peerj.15112), 2023-04-07

## Lipidmaps annotation

### Fatty Acyls [FA]

Octadecanoids [FA02]

Fatty esters [FA07]

Fatty amides [FA08]

Fatty alcohols [FA05]

Fatty Acids and Conjugates [FA01]

Eicosanoids [FA03]

### Glycerolipids [GL]

Monoradylglycerols [GL01]

### Glycerophospholipids [GP]

Glycerophosphoethanolamines [GP02]

Glycerophosphocholines [GP01]

### Polyketides [PR]

Flavonoids [PK12]

### Prenol Lipids [PR]

Isoprenoids [PR01]

### Sphingolipids [SP]

Phosphosphingolipids [SP03]

### Sterols [ST]

Sterols [ST01]

Steroids [ST02]

Secosteroids [ST03]

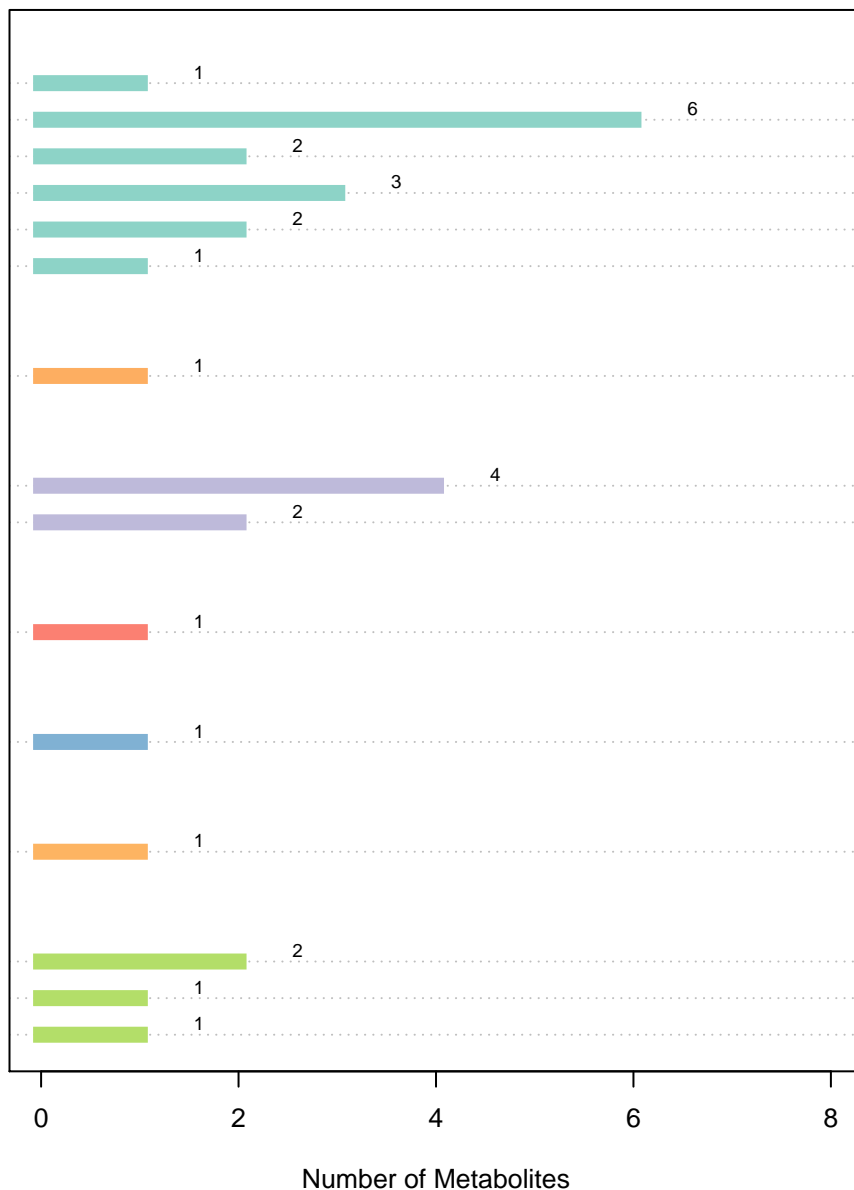

Supplement: RawDataResult.zip [file RawDataResult.zip]
