# Supplementary material for: Semen quality and seminal plasma metabolites in male rabbits (Oryctolagus Cuniculus) under heat stress
Source: PeerJ journal article supplement (doi:10.7717/peerj.15112), 2023-04-07

## KEGG pathway annotation

### Cellular Processes

Cell growth and death

### Environmental Information Processing

Signaling molecules and interaction

Signal transduction

Membrane transport

### Genetic Information Processing

Translation

### Metabolism

Nucleotide metabolism

Metabolism of other amino acids

Metabolism of cofactors and vitamins

Lipid metabolism

Global and overview maps

Energy metabolism

Carbohydrate metabolism

Biosynthesis of other secondary metabolites

Amino acid metabolism

### Organismal Systems

Sensory system

Nervous system

Immune system

Excretory system

Endocrine system

Digestive system

Circulatory system

Aging

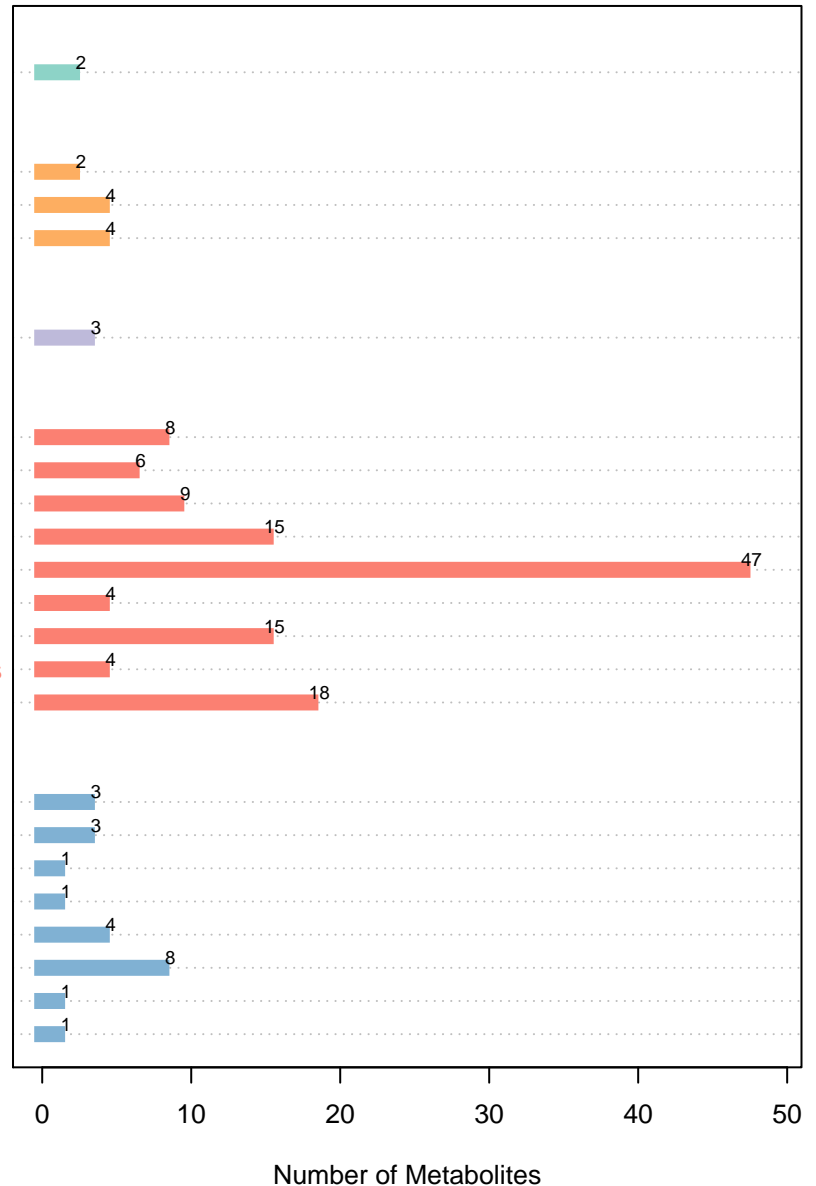

Supplement: RawDataResult.zip [file RawDataResult.zip]
