# Supplementary material for: Semen quality and seminal plasma metabolites in male rabbits (Oryctolagus cuniculus) under heat stress
Source: PeerJ. 2023 Apr 7;11:e15112. doi: 10.7717/peerj.15112 (PMC10103697; doi:10.7717/peerj.15112)
Supplement: Supplemental Information 4 [file peerj-11-15112-s004.xlsx]

## Sheet: Sheet1
ID	Name	log2FC	Pvalue	VIP	Up.Down
Com_11190_pos	Tetradecanedioic acid	2.71864	0	2.279	Up
Com_5463_pos	Methyl dihydrojasmonate	2.95017	0	2.243	Up
Com_2440_pos	12-oxo Phytodienoic Acid	3.49428	0	2.299	Up
Com_4722_pos	(11E,15Z)-9,10,13-trihydroxyoctadeca-11,15-dienoic acid	3.8321	0	2.271	Up
Com_5008_pos	17(S)-HETE	2.56257	0	2.249	Up
Com_232_neg	Palmitic acid	1.73878	0	2.241	Up
Com_2167_neg	Stearic acid	3.06396	0	2.284	Up
Com_4862_pos	Sedanolide	3.16681	0	2.189	Up
Com_6456_pos	2,4-dihydroxyheptadec-16-en-1-yl acetate	2.14282	0	2.219	Up
Com_1643_pos	N,N-Dimethylaniline	4.69733	0	2.212	Up
Com_922_pos	Caprolactam	3.28825	0	2.139	Up
Com_7084_pos	N-Acetyl-L-leucine	1.10239	0	1.92	Up
Com_8246_pos	2-Aminobenzenesulfonic acid	1.22855	0	1.821	Up
Com_9307_pos	11-Oxoetiocholanolone	1.46958	0.001	1.8	Up
Com_4055_pos	Tetramethylpyrazine	3.01914	0.001	1.849	Up
Com_4649_pos	Oleoyl ethanolamide	1.58782	0.001	1.728	Up
Com_1621_pos	Eicosapentaenoic acid	1.85994	0.001	1.702	Up
Com_4684_pos	3-(5-phenyl-1,3-oxazol-2-yl)-4-(trifluoromethyl)pyridine	2.26114	0.001	1.716	Up
Com_1138_pos	Cytosine	1.4991	0.001	1.686	Up
Com_1951_neg	D-(+)-Tryptophan	1.99494	0.004	1.646	Up
Com_447_pos	Creatinine	1.30726	0.002	1.578	Up
Com_156_pos	2-(acetylamino)-3-(1H-indol-3-yl)propanoic acid	2.04491	0.002	1.594	Up
Com_1664_pos	Cytidine	1.21885	0.003	1.573	Up
Com_2820_pos	4-methoxy-6-(prop-2-en-1-yl)-2H-1,3-benzodioxole	1.27489	0.004	1.571	Up
Com_9985_pos	4-methyl-5-oxo-2-pentyl-2,5-dihydrofuran-3-carboxylic acid	1.89735	0.011	1.548	Up
Com_966_pos	Indole-3-acrylic acid	1.66047	0.005	1.547	Up
Com_3220_pos	3-Methylindole	1.89109	0.006	1.494	Up
Com_4263_pos	gamma-Glutamylleucine	1.02501	0.006	1.478	Up
Com_10042_pos	1-(3,4-dimethoxyphenyl)ethan-1-one oxime	0.608837	0.008	1.427	Up
Com_4382_pos	D-Raffinose	0.933823	0.01	1.387	Up
Com_5747_neg	Gamma-Glu-Leu	0.987297	0.019	1.373	Up
Com_3343_pos	8-Hydroxyquinoline	0.815826	0.021	1.271	Up
Com_566_pos	6-Methylquinoline	0.614206	0.022	1.266	Up
Com_776_pos	2-Amino-1,3-octadecanediol	0.693466	0.022	1.315	Up
Com_11056_pos	3,3-dimethyl-5-oxo-5-[(3-phenyl-1H-pyrazol-5-yl)amino]pentanoic acid	0.733499	0.022	1.324	Up
Com_600_pos	L-Glutamic acid monosodium salt	1.21155	0.023	1.36	Up
Com_636_pos	D-(+)-Maltose	0.675146	0.024	1.252	Up
Com_4262_pos	5-(2,5-dihydroxyhexyl)oxolan-2-one	1.05213	0.024	1.297	Up
Com_6244_pos	16(R)-HETE	1.72978	0.025	1.298	Up
Com_5022_pos	Stearoyl ethanolamide	0.680422	0.026	1.278	Up
Com_1894_pos	Isoquinoline	1.58811	0.026	1.267	Up
Com_9136_pos	diethyl 2-(3-chloroanilino)malonate	1.64389	0.028	1.296	Up
Com_10634_pos	N-[3-(1H-imidazol-1-yl)propyl]-5-methoxy-1H-indole-2-carboxamide	0.799107	0.031	1.283	Up
Com_834_pos	4-(1H-pyrazol-1-yl)-N,N-bis(2-pyridinylmethyl)benzenesulfonamide	0.667023	0.033	1.205	Up
Com_358_pos	Indole	0.586885	0.035	1.177	Up
Com_9388_pos	5-(3-phenylprop-2-enylidene)-2-thioxohexahydropyrimidine-4,6-dione	1.74954	0.035	1.245	Up
Com_2544_pos	N,5-Bis(3-nitrophenyl)oxazol-2-amine	1.40898	0.042	1.141	Up
Com_4019_pos	Phenylpropiolic acid	0.738534	0.042	1.145	Up
Com_8899_pos	Limonin	-3.37097	0	2.347	Down
Com_10834_pos	1-(1-adamantyl)-2-[(2-chloro-4-fluorophenyl)thio]ethan-1-one	-1.53225	0	1.996	Down
Com_2406_pos	L-Ergothioneine	-1.80224	0	1.983	Down
Com_4747_pos	2-Phenylethylamine	-1.13236	0	1.85	Down
Com_783_pos	Tetranor-12(S)-HETE	-1.65535	0	1.837	Down
Com_3399_pos	D-(+)-Proline	-1.03366	0	1.769	Down
Com_3932_pos	Tramadol N-Oxide	-2.07273	0.001	1.705	Down
Com_7_pos	Betaine	-0.96218	0.002	1.716	Down
Com_71_pos	Hypoxanthine	-1.6881	0.002	1.667	Down
Com_8313_pos	4-(pentyloxy)benzene-1-carbohydrazide	-0.87519	0.005	1.533	Down
Com_6050_pos	1,3,5-Trimethylpyrazole	-1.04508	0.007	1.579	Down
Com_256_neg	Arachidonic acid	-0.99722	0.007	1.523	Down
Com_325_neg	L-Malate	-0.79209	0.008	1.486	Down
Com_383_neg	acetoacetate	-0.74833	0.009	1.5	Down
Com_201_pos	DL-Stachydrine	-1.00386	0.007	1.447	Down
Com_2982_pos	7-Ketocholesterol	-1.37259	0.008	1.449	Down
Com_280_pos	3-methyl-5-oxo-5-(4-toluidino)pentanoic acid	-0.82161	0.01	1.445	Down
Com_1426_pos	LSD-d3	-0.90643	0.01	1.398	Down
Com_216_pos	8-Aminooctanoic acid	-2.06711	0.011	1.416	Down
Com_261_pos	Nicotinamide	-0.71053	0.015	1.372	Down
Com_6596_pos	4,7,8-trimethoxyfuro[2,3-b]quinoline	-1.37944	0.023	1.433	Down
Com_5106_pos	XLR11 N-(2-fluoropentyl) isomer	-0.64116	0.025	1.303	Down
Com_376_pos	Corey Lactone Diol	-0.68177	0.027	1.28	Down
