# Supplementary material for: Semen quality and seminal plasma metabolites in male rabbits (Oryctolagus cuniculus) under heat stress
Source: PeerJ. 2023 Apr 7;11:e15112. doi: 10.7717/peerj.15112 (PMC10103697; doi:10.7717/peerj.15112)
Supplement: Supplemental Information 5 [file peerj-11-15112-s005.xlsx]

## Sheet: Sheet1
Table 1. Elution conditions of mobile phase gradient
Time（min）	Flow velocity（mL/min）	Mobile phase A（%）	Mobile phase B（%）
0	0.2	98	2
1.5	0.2	98	2
3	0.2	0	85
10	0.2	0	100
10.1	0.2	98	2
