# Supplementary material for: Semen quality and seminal plasma metabolites in male rabbits (Oryctolagus cuniculus) under heat stress
Source: PeerJ. 2023 Apr 7;11:e15112. doi: 10.7717/peerj.15112 (PMC10103697; doi:10.7717/peerj.15112)
Supplement: Supplemental Information 6 [file peerj-11-15112-s006.xlsx]

## Sheet: Sheet1
Table 2. Temperature, humidity, and THI index changes in rabbit house in May and August
Time	Temperature ℃	Humidity %	THI
May	22.04±2.52	61.82±13.35	20.94±2.22
June	26.10±2.47	69.93±15.47	24.92±1.95
July	27.66±2.24	80.10±4.69	26.84±2.12
August	30.15±0.67	78.62±6.88	29.10±2.52
