# Supplementary material for: Semen quality and seminal plasma metabolites in male rabbits (Oryctolagus cuniculus) under heat stress
Source: PeerJ. 2023 Apr 7;11:e15112. doi: 10.7717/peerj.15112 (PMC10103697; doi:10.7717/peerj.15112)
Supplement: Supplemental Information 7 [file peerj-11-15112-s007.xlsx]

## Sheet: Sheet1
Table 3. Effects of heat stress on sperm motility of male rabbits
Semen indicators	Non-heat stress group	Heat stress group
Grade A sperm count（%）	79.60±6.15**	39.16±8.52
Grade B sperm count（%）	7.31±2.29**	32.00±6.55
Grade C sperm count（%）	2.63±1.38**	16.46±4.10
Grade D sperm count（%）	10.59±3.08	13.91±3.23
The same line (**) represents P < 0.01, indicating extremely significant difference; (*) represents P < 0.05, indicating significant difference. Grade A, fast straight forward; Grade B, slow straight forward; Grade C, non-forward movement; Grade D, and non-movement.
