# Supplementary material for: Semen quality and seminal plasma metabolites in male rabbits (Oryctolagus cuniculus) under heat stress
Source: PeerJ. 2023 Apr 7;11:e15112. doi: 10.7717/peerj.15112 (PMC10103697; doi:10.7717/peerj.15112)
Supplement: Supplemental Information 8 [file peerj-11-15112-s008.xlsx]

## Sheet: Sheet1
Table 4. Effects of heat stress on semen quality parameters of male rabbits
Semen indicators	Non-heat stress group	Heat stress group
Sperm motility（%）	86.81±7.13**	71.20±9.75
Sperm motility rate（%）	88.55±5.55**	80.16±8.94
Sperm density（108/mL）	5.03±0.88**	3.80±0.82
Semen pH	7.27±0.12**	7.02±0.11
Sperm malformations（%）	12.56±1.72**	16.11±2.26
Amount of sperm（mL）	0.96±0.34*	0.77±0.29
Total sperm output (TSO)（108/the amount of ejaculation at one time）	4.82±0.30**	2.92±0.24
Total motile sperm (TMS)（108/the amount of ejaculation at one time）	4.24±0.02**	2.34±0.02
Total functional sperm fraction (TFSF)（108/the amount of ejaculation at one time）	3.61±0.16**	1.72±0.33
The same line (**) represents P < 0.01, indicating extremely significant difference; (*) represents P < 0.05, indicating significant difference.
