# Supplementary material for: Semen quality and seminal plasma metabolites in male rabbits (Oryctolagus cuniculus) under heat stress
Source: PeerJ. 2023 Apr 7;11:e15112. doi: 10.7717/peerj.15112 (PMC10103697; doi:10.7717/peerj.15112)
Supplement: Supplemental Information 9 [file peerj-11-15112-s009.xlsx]

## Sheet: Sheet1
Table 5. Effects of heat stress on seminal plasma biochemical indices of male rabbits
Seminal plasma biochemical indexes	Non-heat stress group	Heat stress group
HSP70，pg/mL	1255.38±245.28**	1523.25±108.99
Fructose，mg/mL	1.46±0.10**	1.30±0.06
Testosterone，pg/mL	341.49±40.60**	266.71±40.97
ALP，ng/mL	162.93±23.70	172.08±25.19
ACP，ng/mL	56.02±4.19**	72.36±6.26
α-Glu，μg/mL	25.94±4.46**	22.33±4.21
LDH，ng/mL	59.05±10.09	58.49±9.15
Na+，mmol/L	67.82±21.09**	47.92±15.99
K+，mmol/L	8.30±0.24**	7.89±0.43
Mg2+，mmol/L	2.32±0.13*	2.22±0.14
The same line (**) represents P < 0.01, indicating extremely significant difference; (*) represents P < 0.05, indicating significant difference.
