# Supplementary figures and images for: Semen quality and seminal plasma metabolites in male rabbits (Oryctolagus Cuniculus) under heat stress (part 1 of 2)
Source: PeerJ journal article supplement (doi:10.7717/peerj.15112), 2023-04-07

H.vs.NH

Metabolites

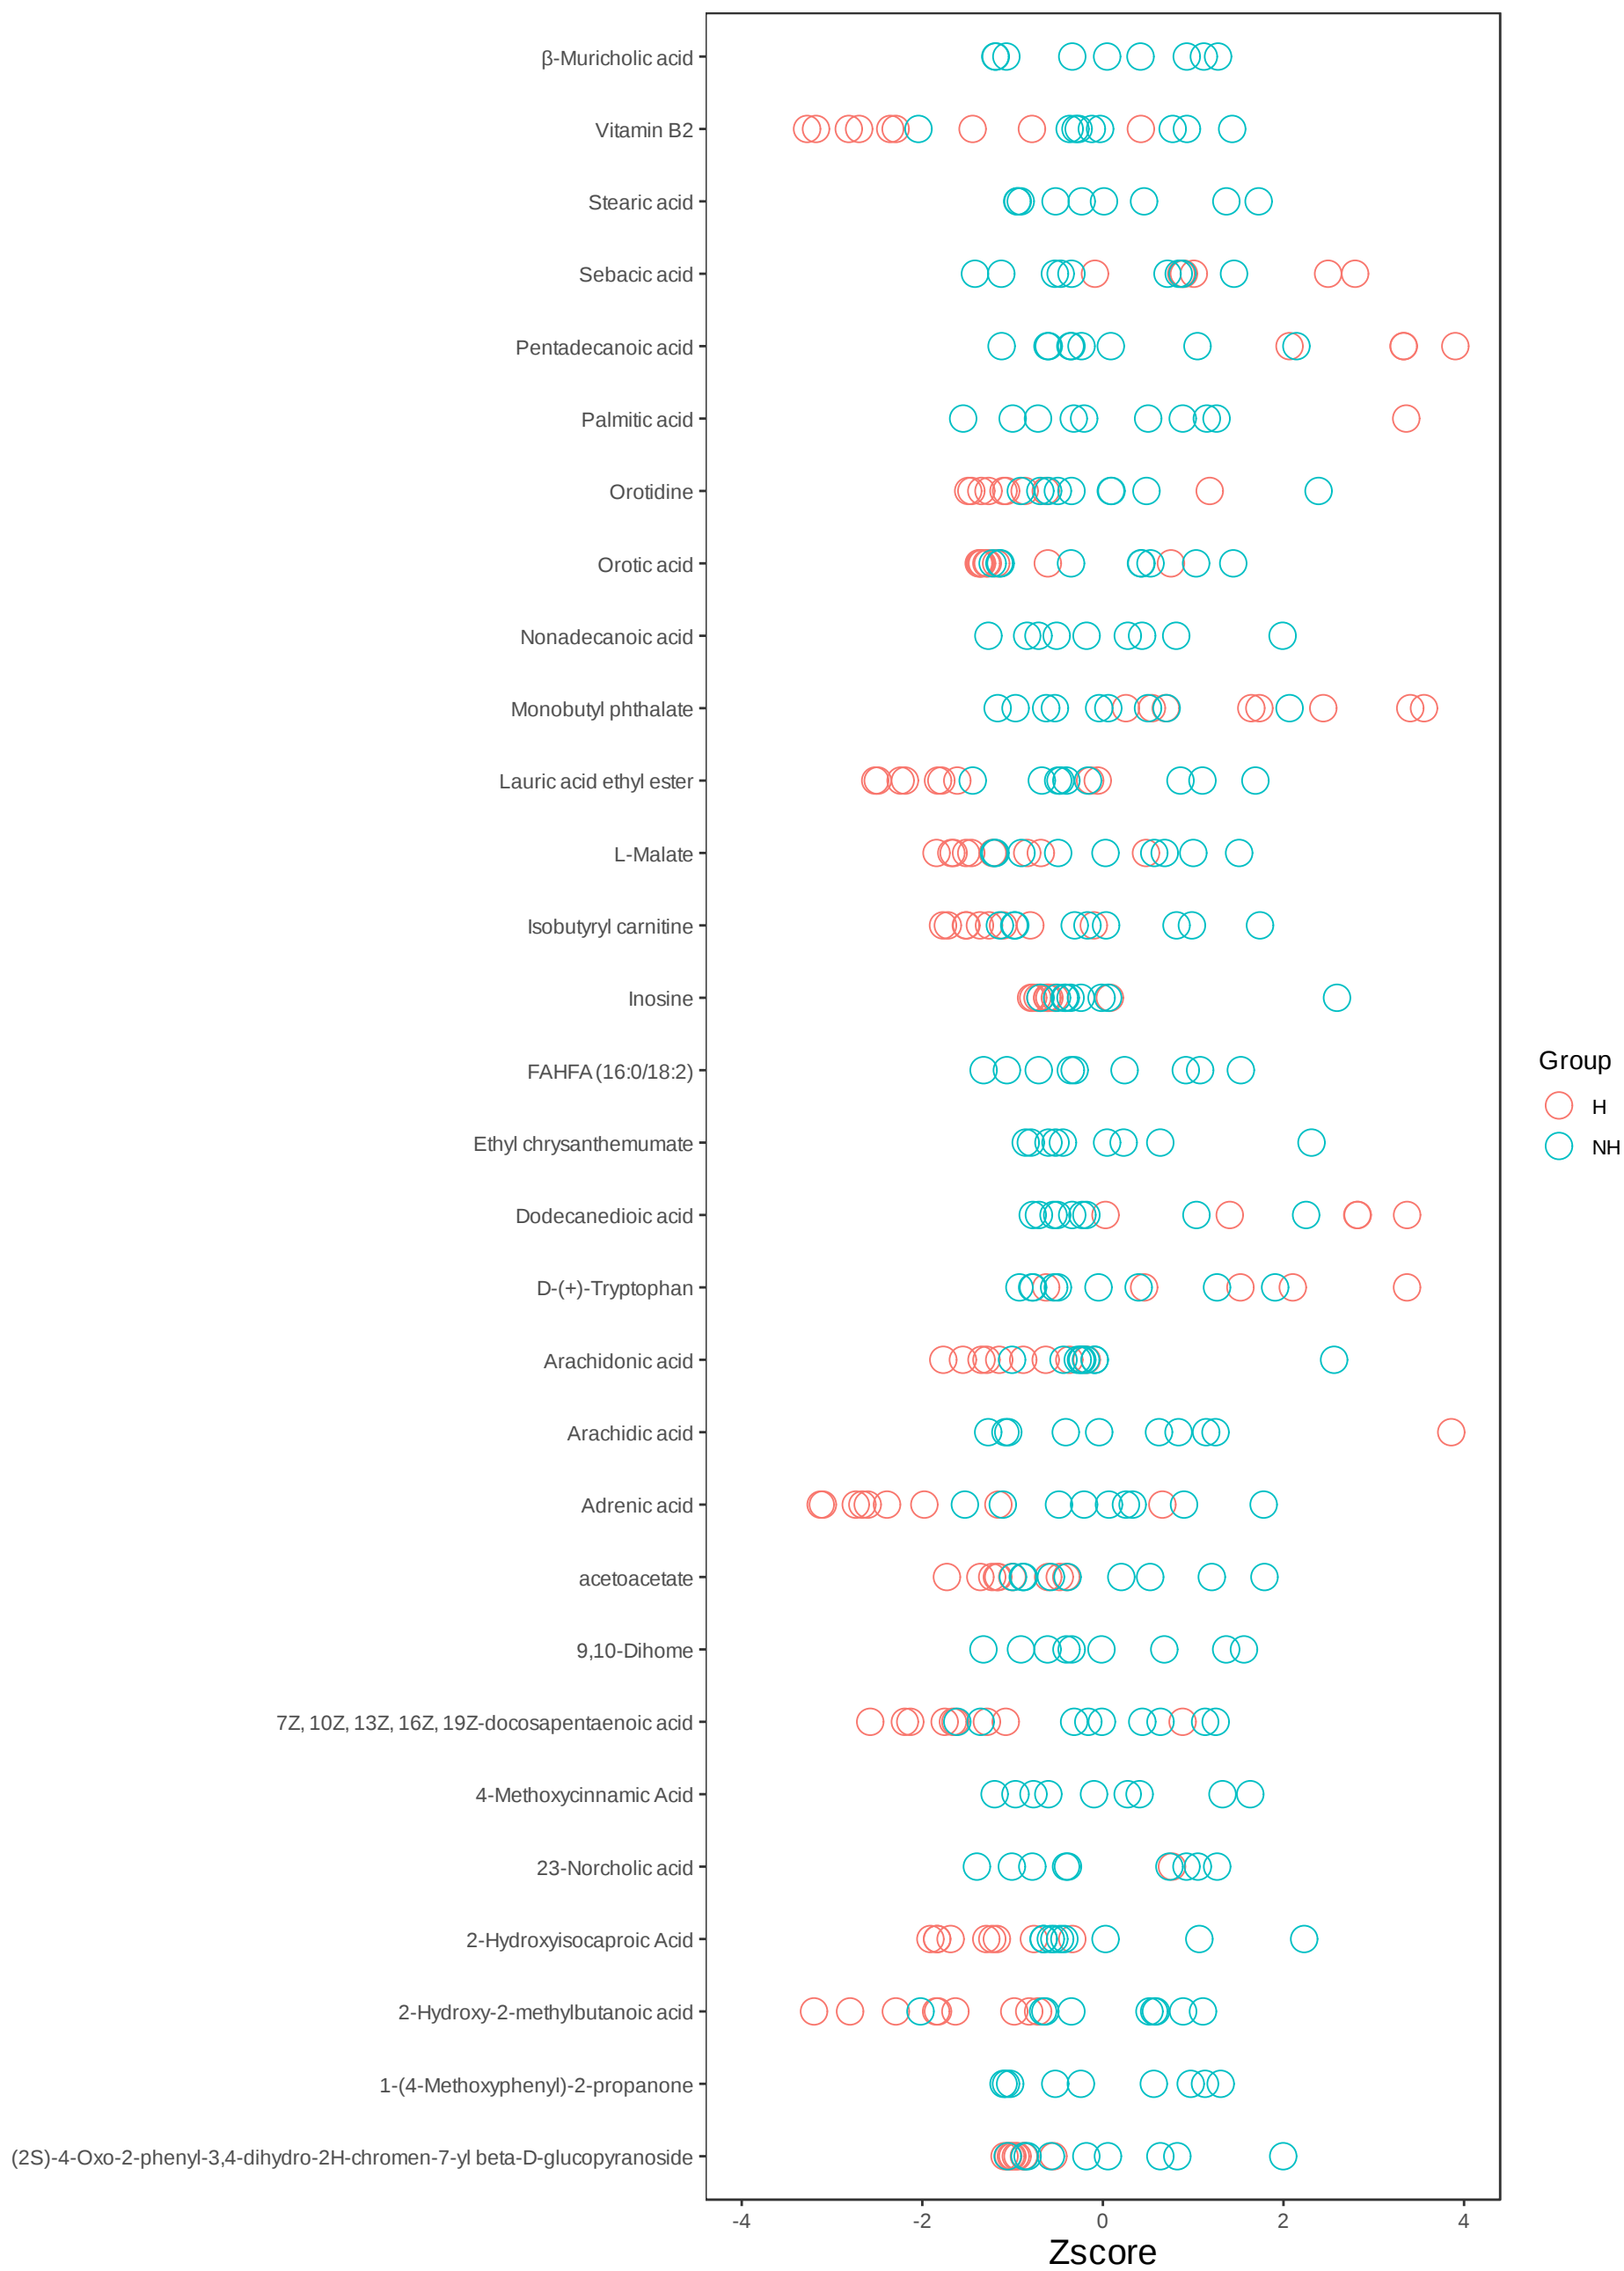

Supplement: RawDataResult.zip [file RawDataResult.zip]

H.vs.NH

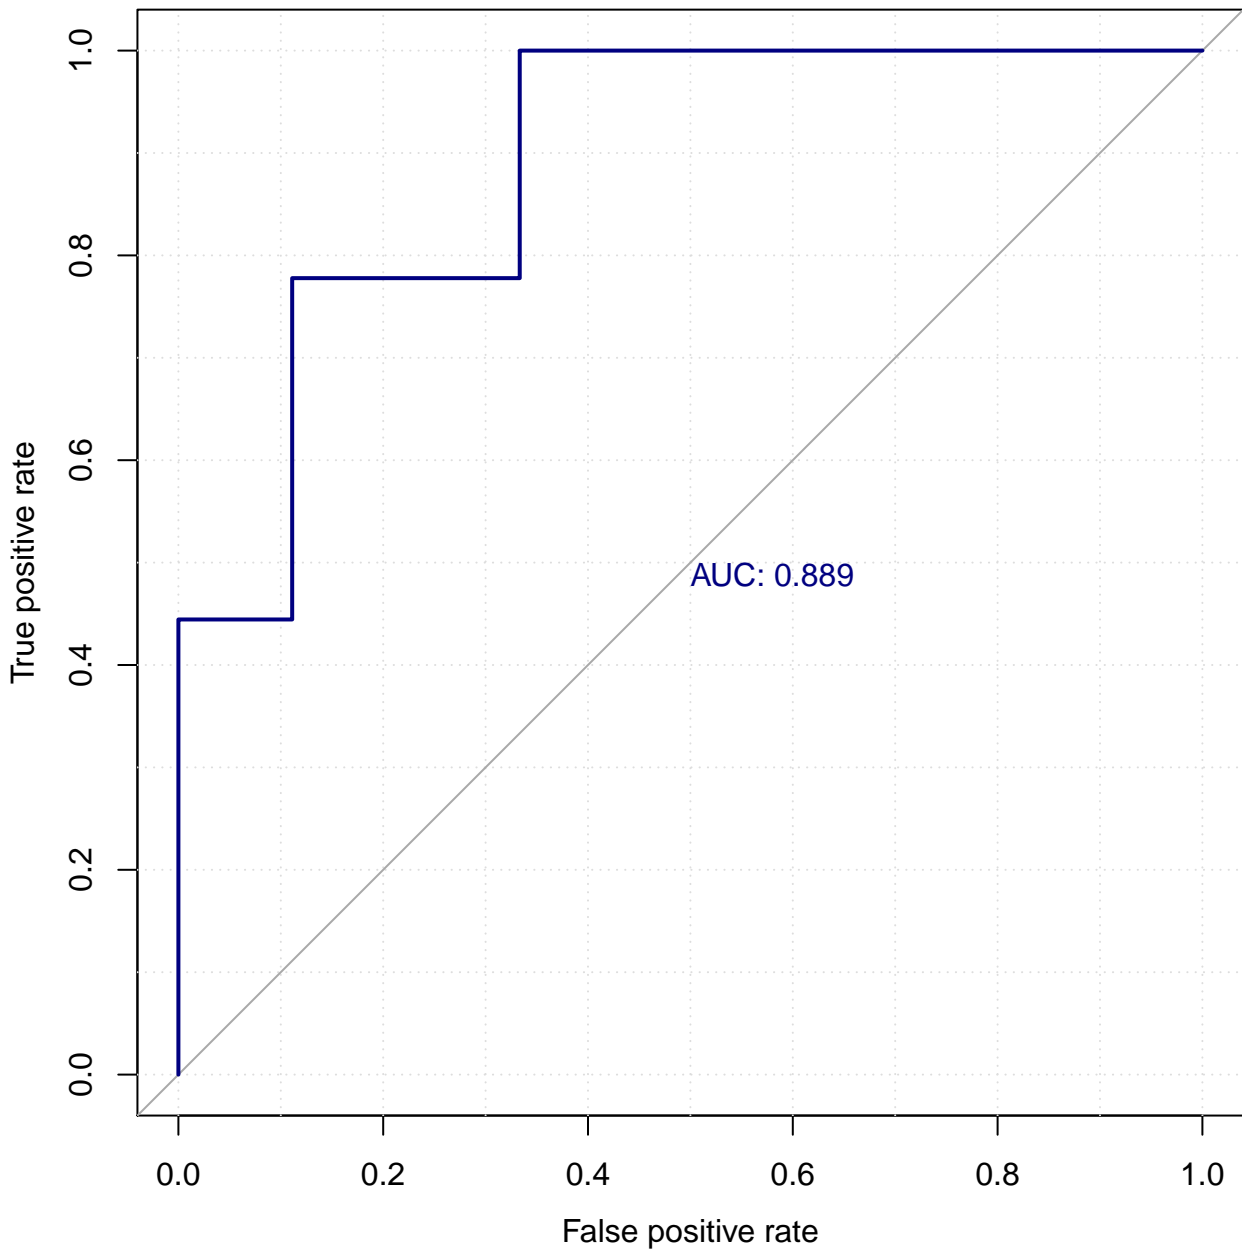

Supplement: RawDataResult.zip [file RawDataResult.zip]

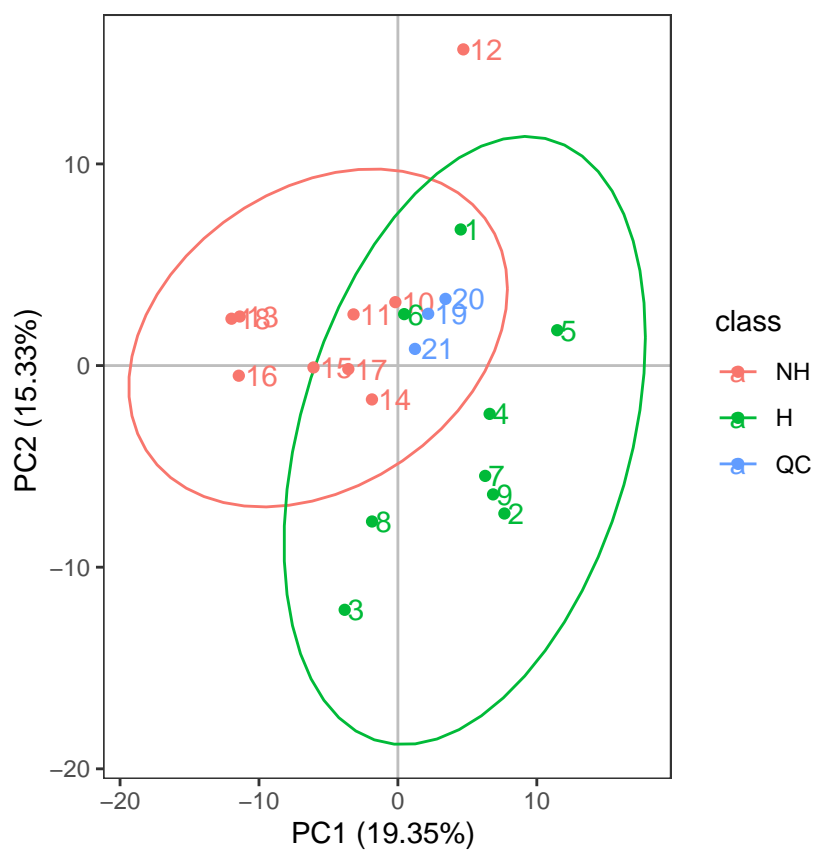

Supplement: RawDataResult.zip [file RawDataResult.zip]

# H.vs.NH

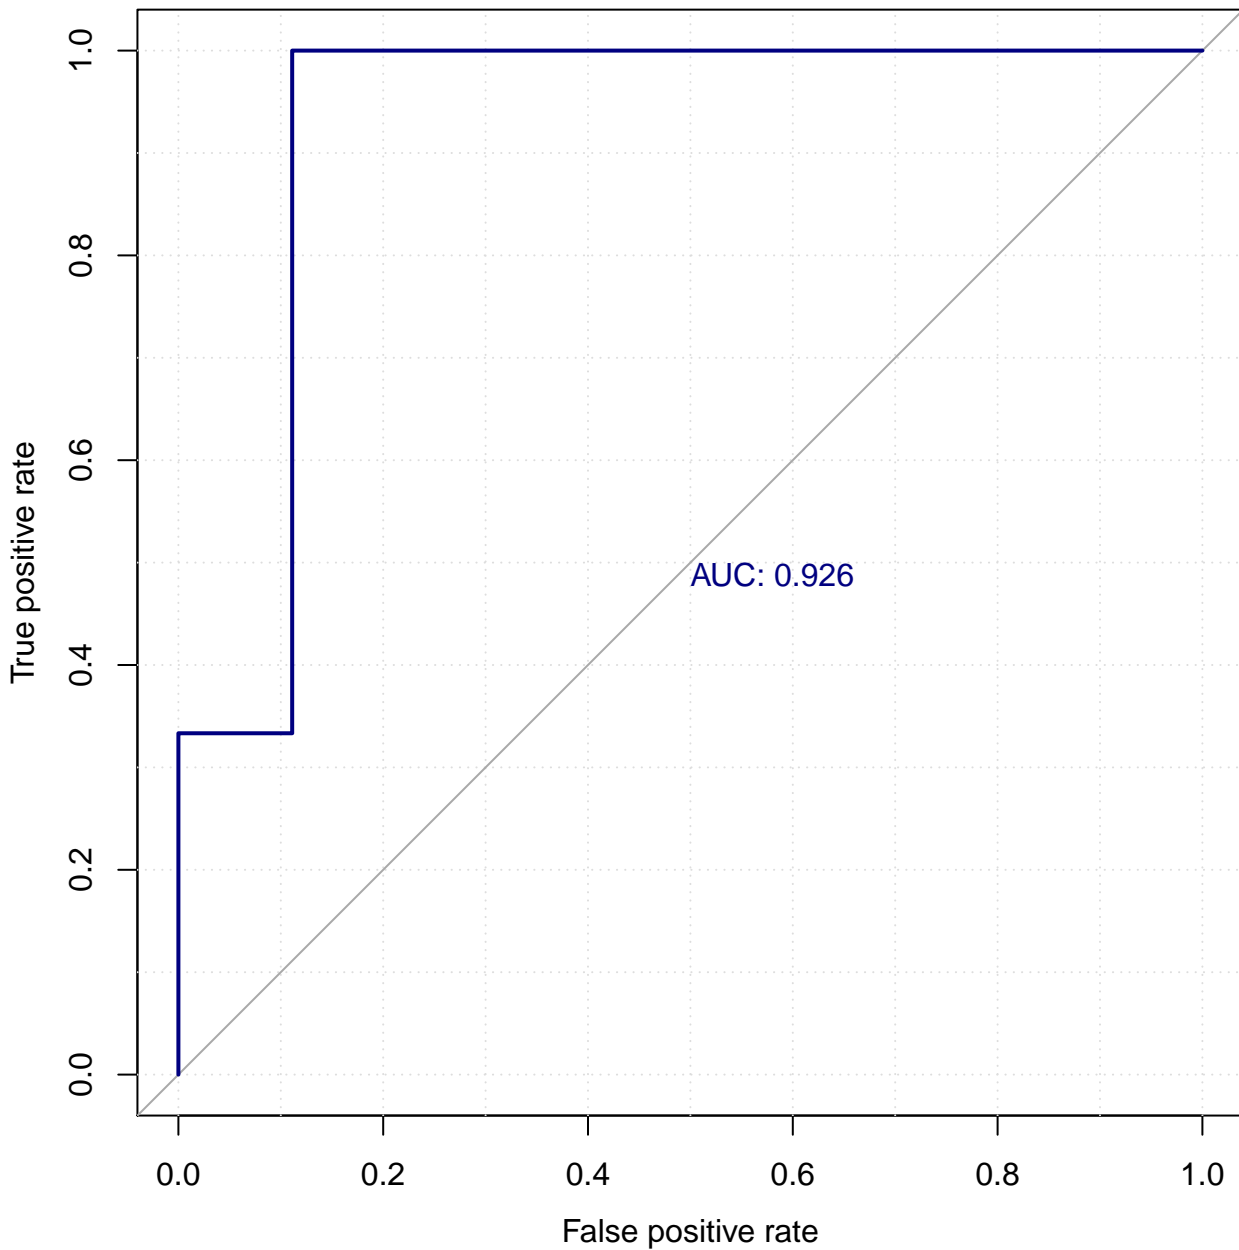

Supplement: RawDataResult.zip [file RawDataResult.zip]

# H.vs.NH

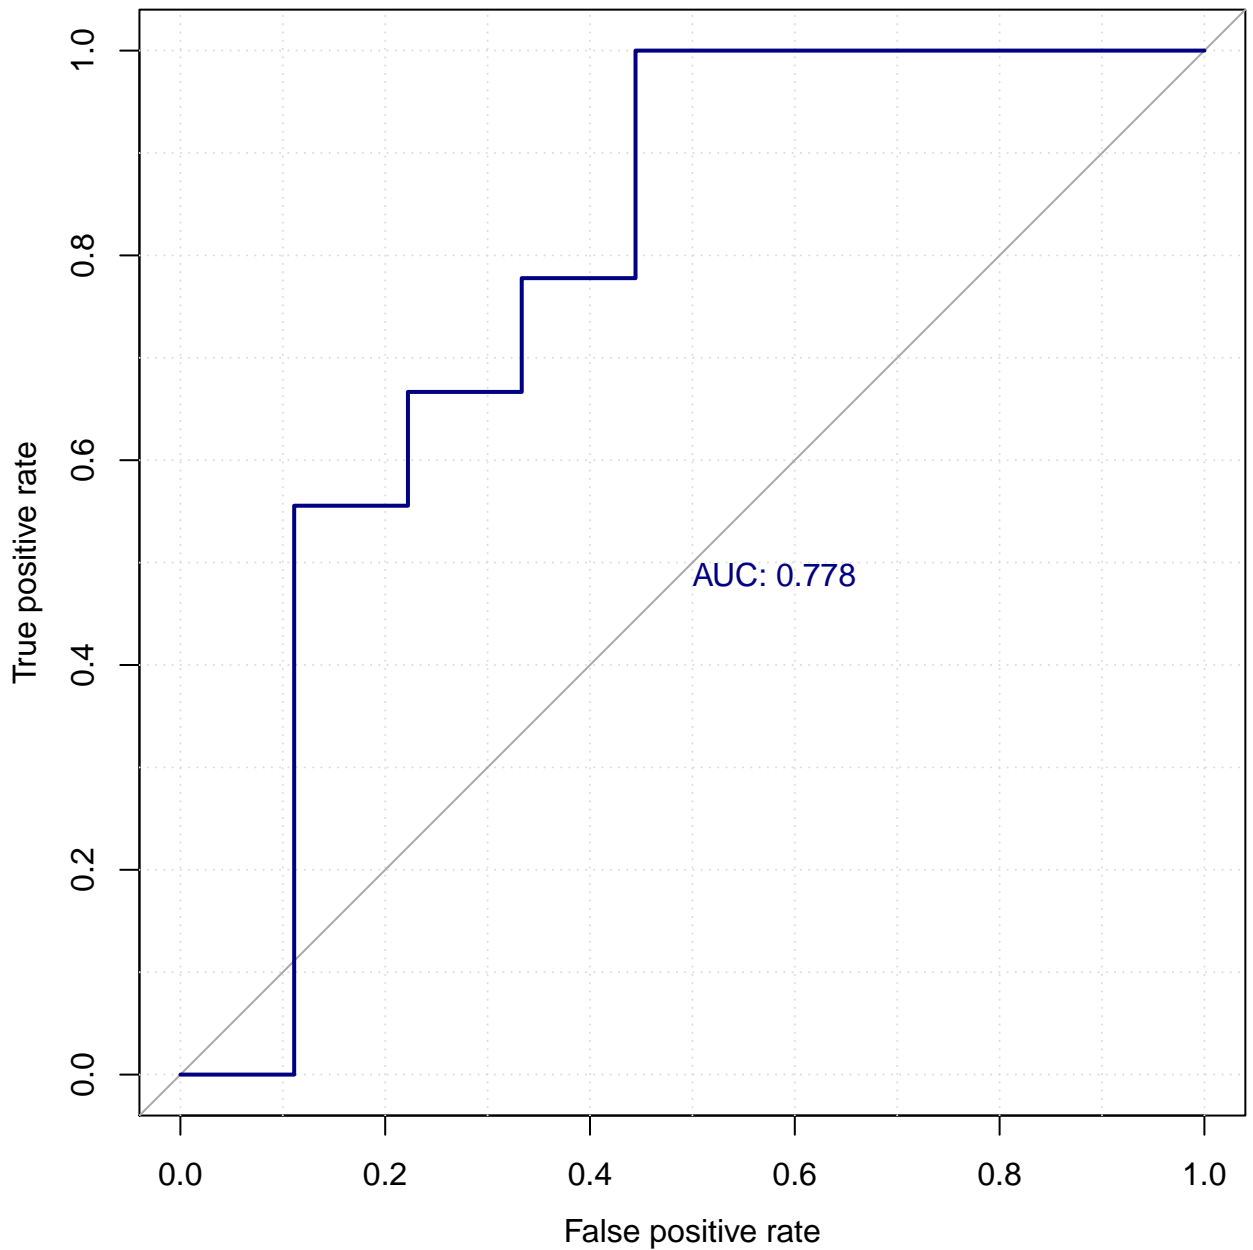

Supplement: RawDataResult.zip [file RawDataResult.zip]

H.vs.NH

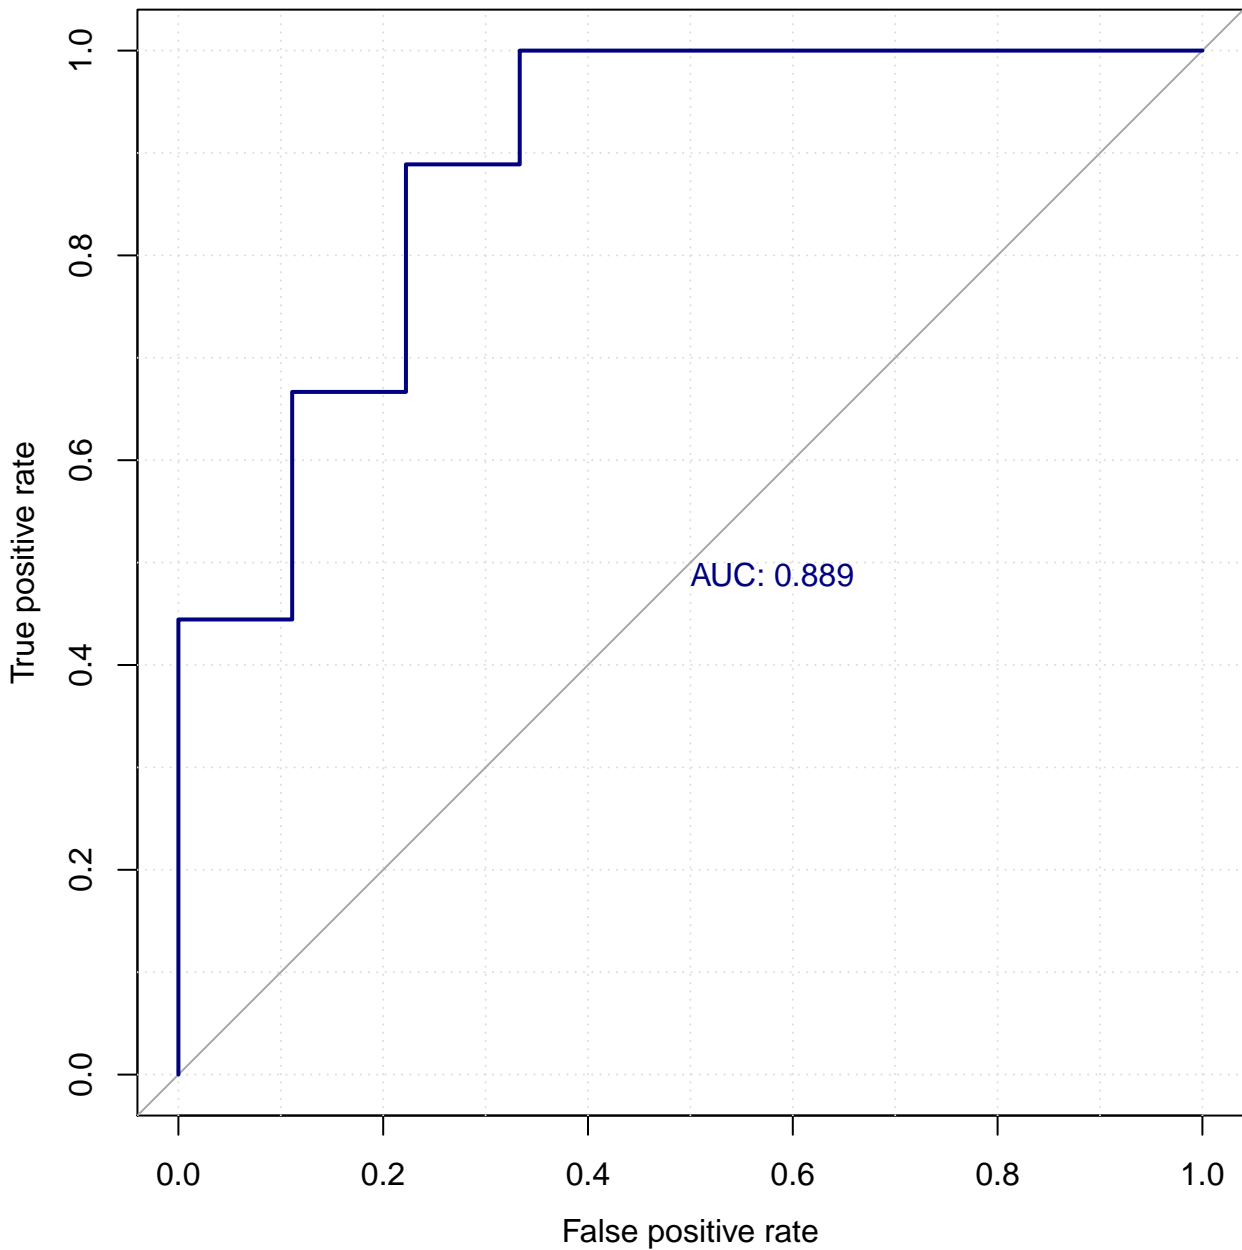

Supplement: RawDataResult.zip [file RawDataResult.zip]

# H.vs.NH

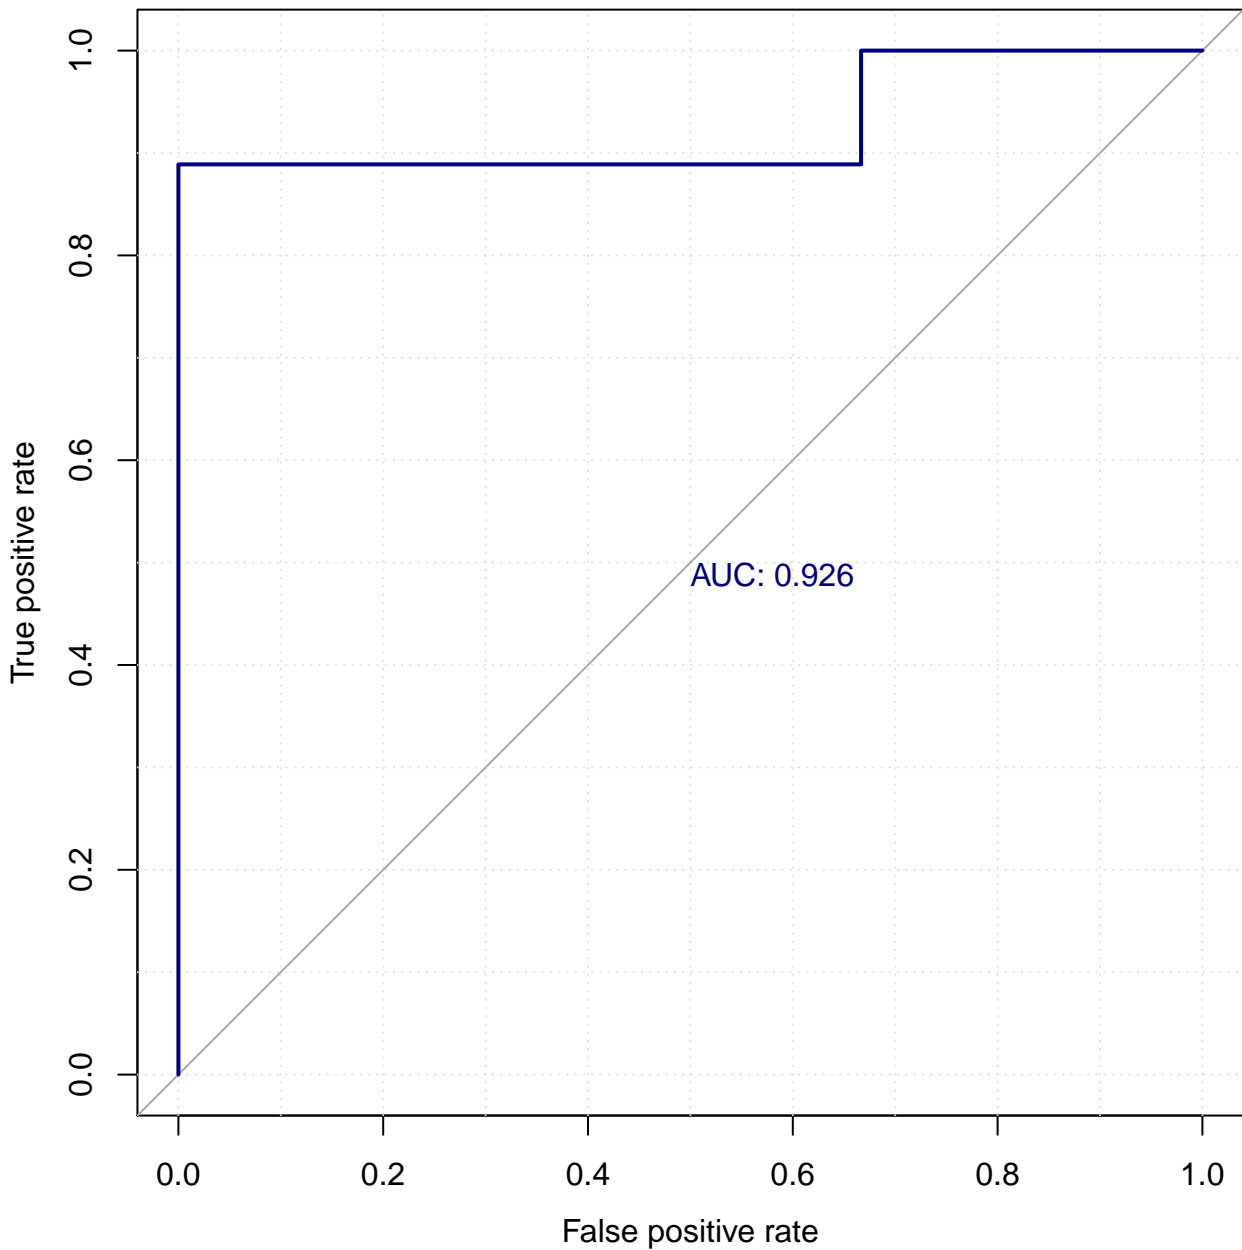

Supplement: RawDataResult.zip [file RawDataResult.zip]

H.vs.NH

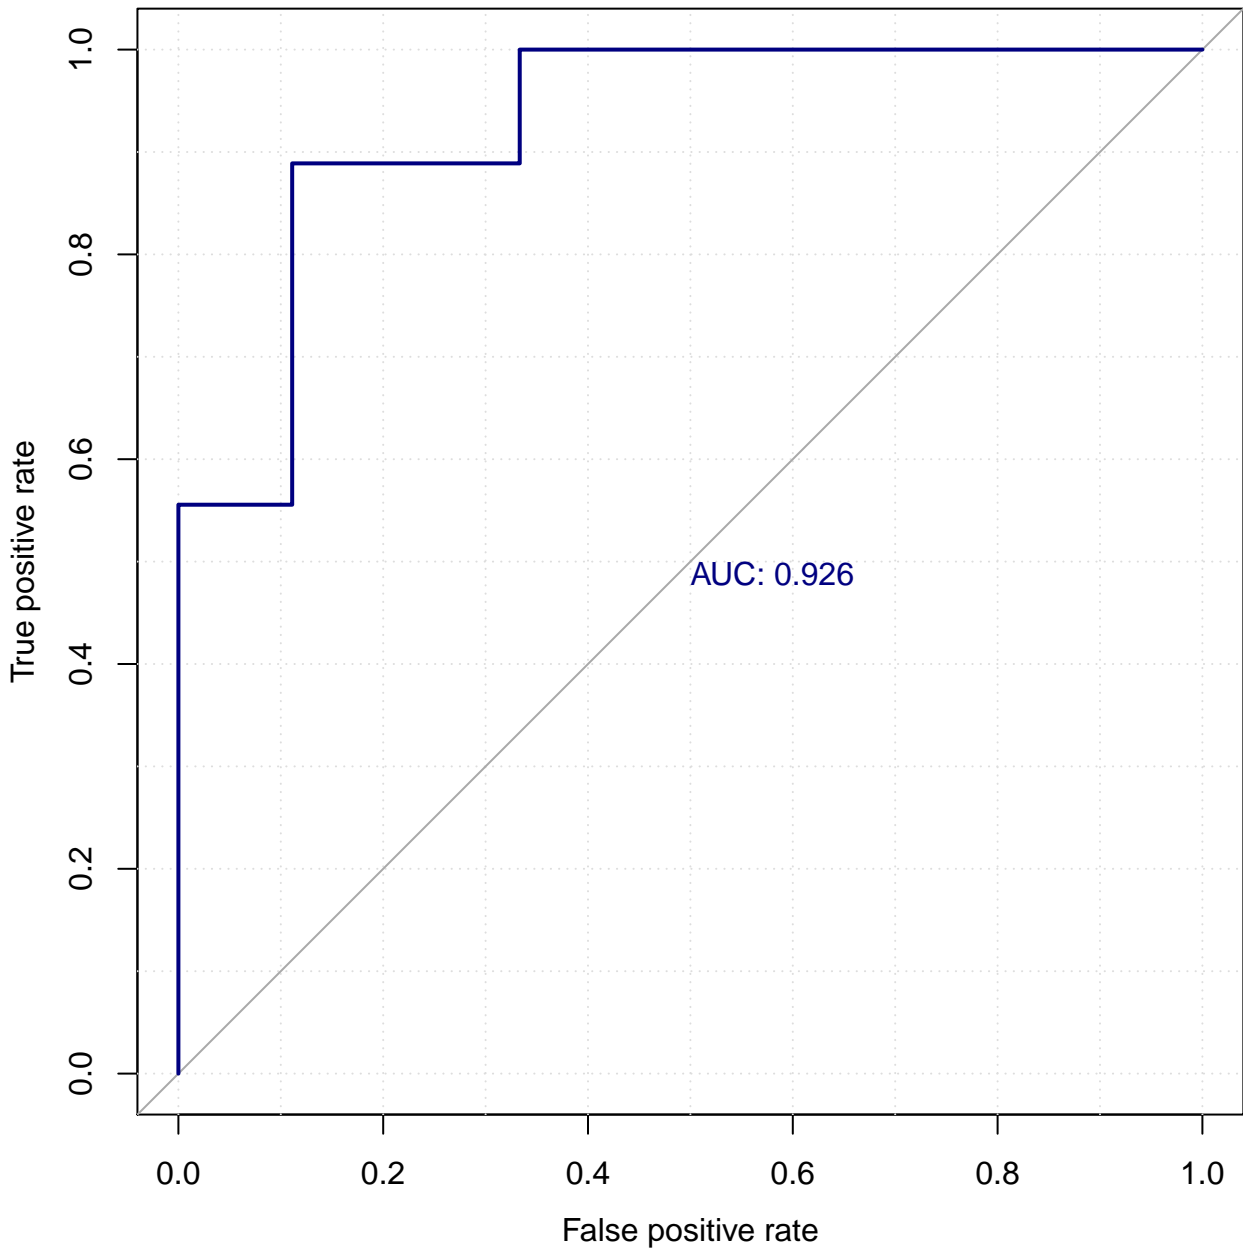

Supplement: RawDataResult.zip [file RawDataResult.zip]

# H.vs.NH

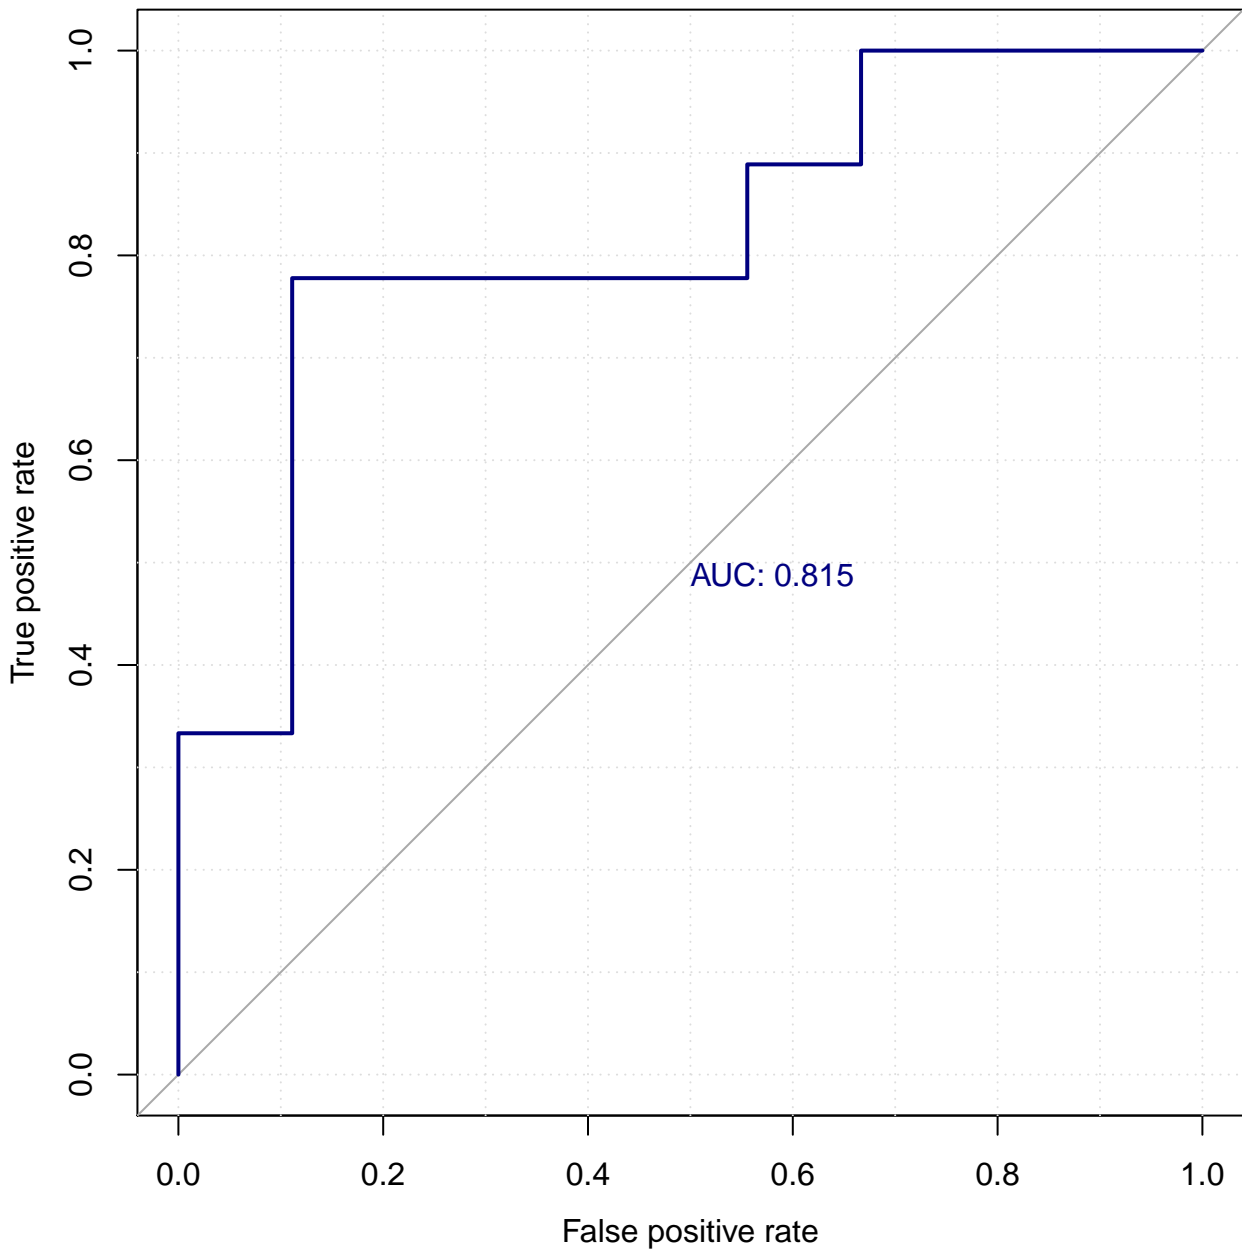

Supplement: RawDataResult.zip [file RawDataResult.zip]

H.vs.NH

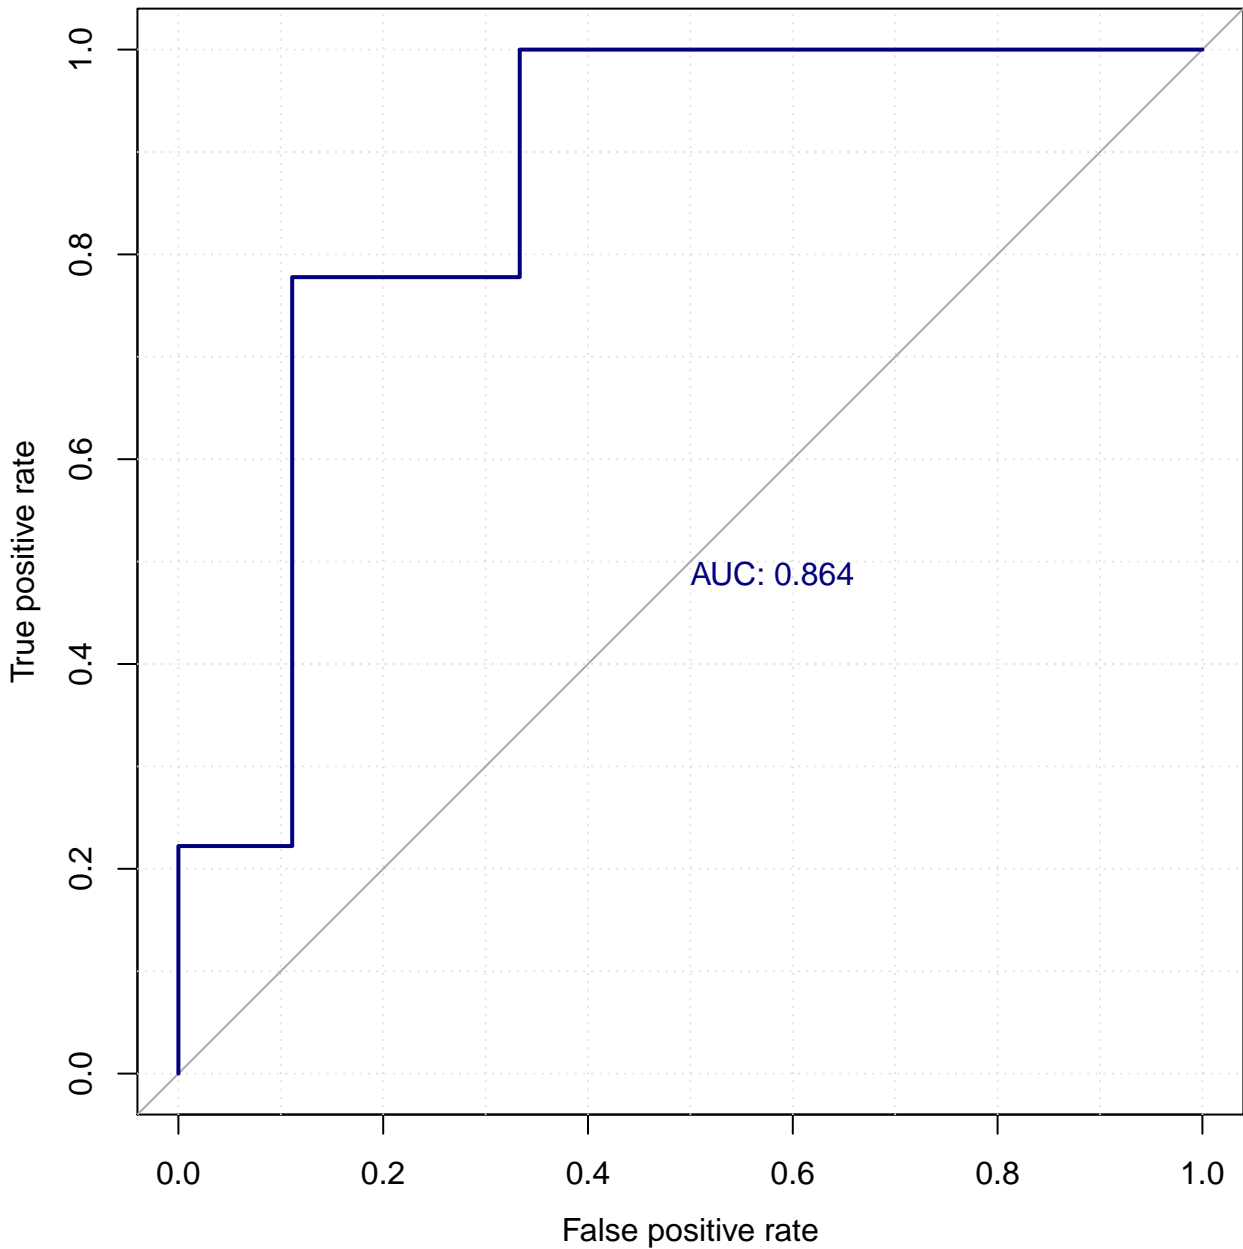

Supplement: RawDataResult.zip [file RawDataResult.zip]

# H.vs.NH

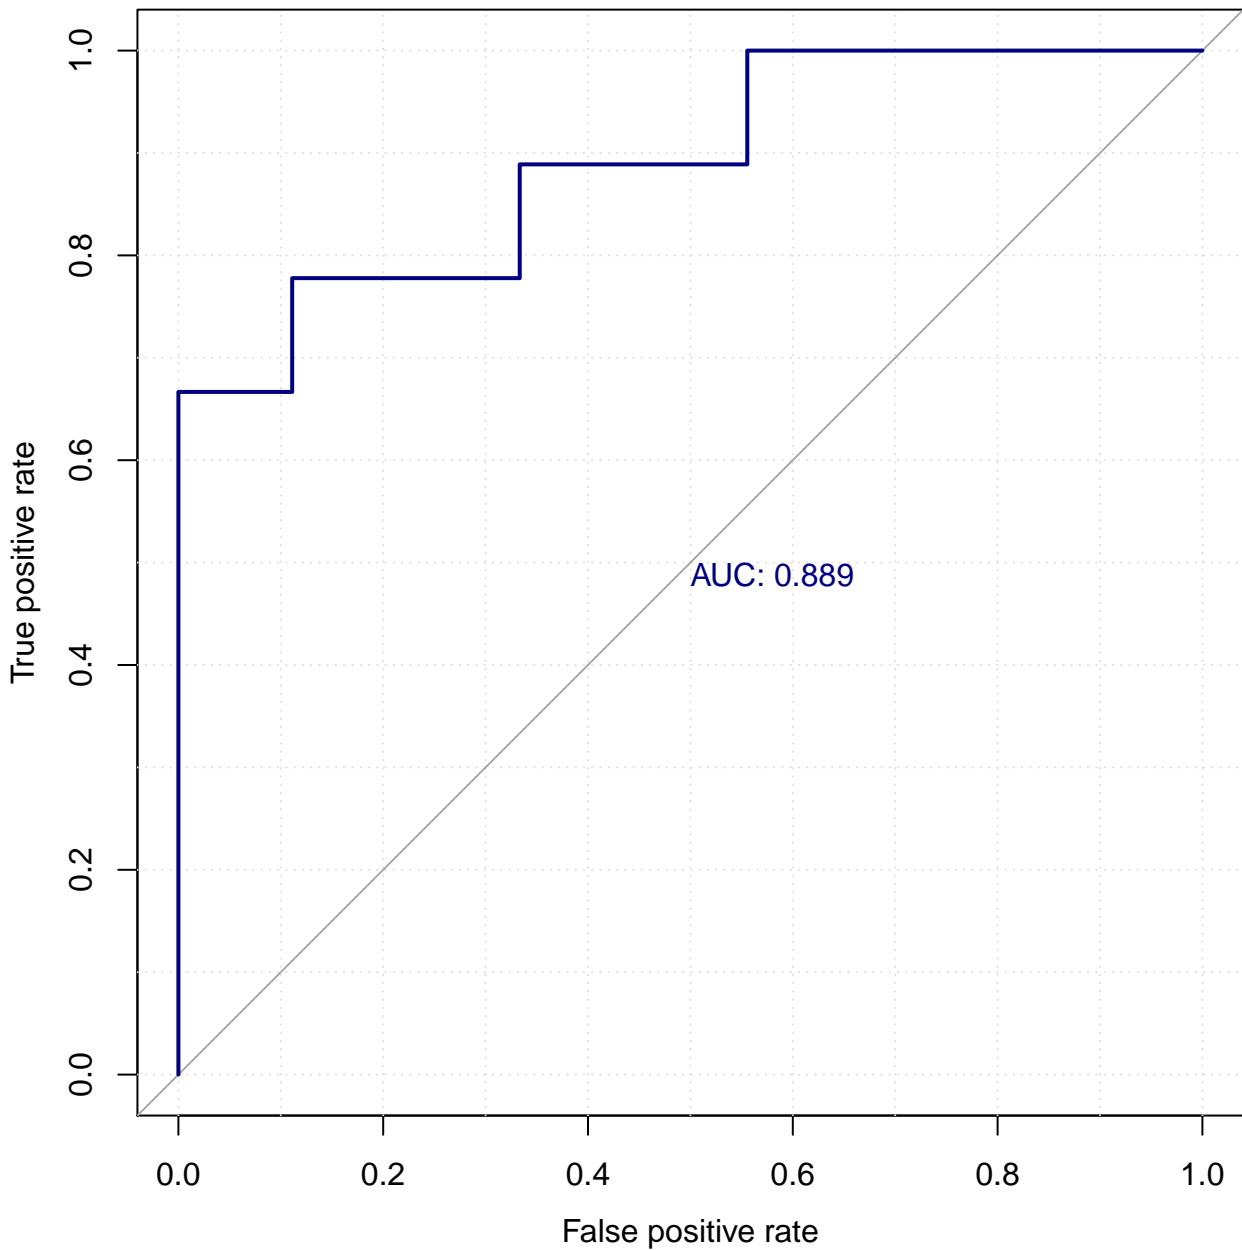

Supplement: RawDataResult.zip [file RawDataResult.zip]

H.vs.NH

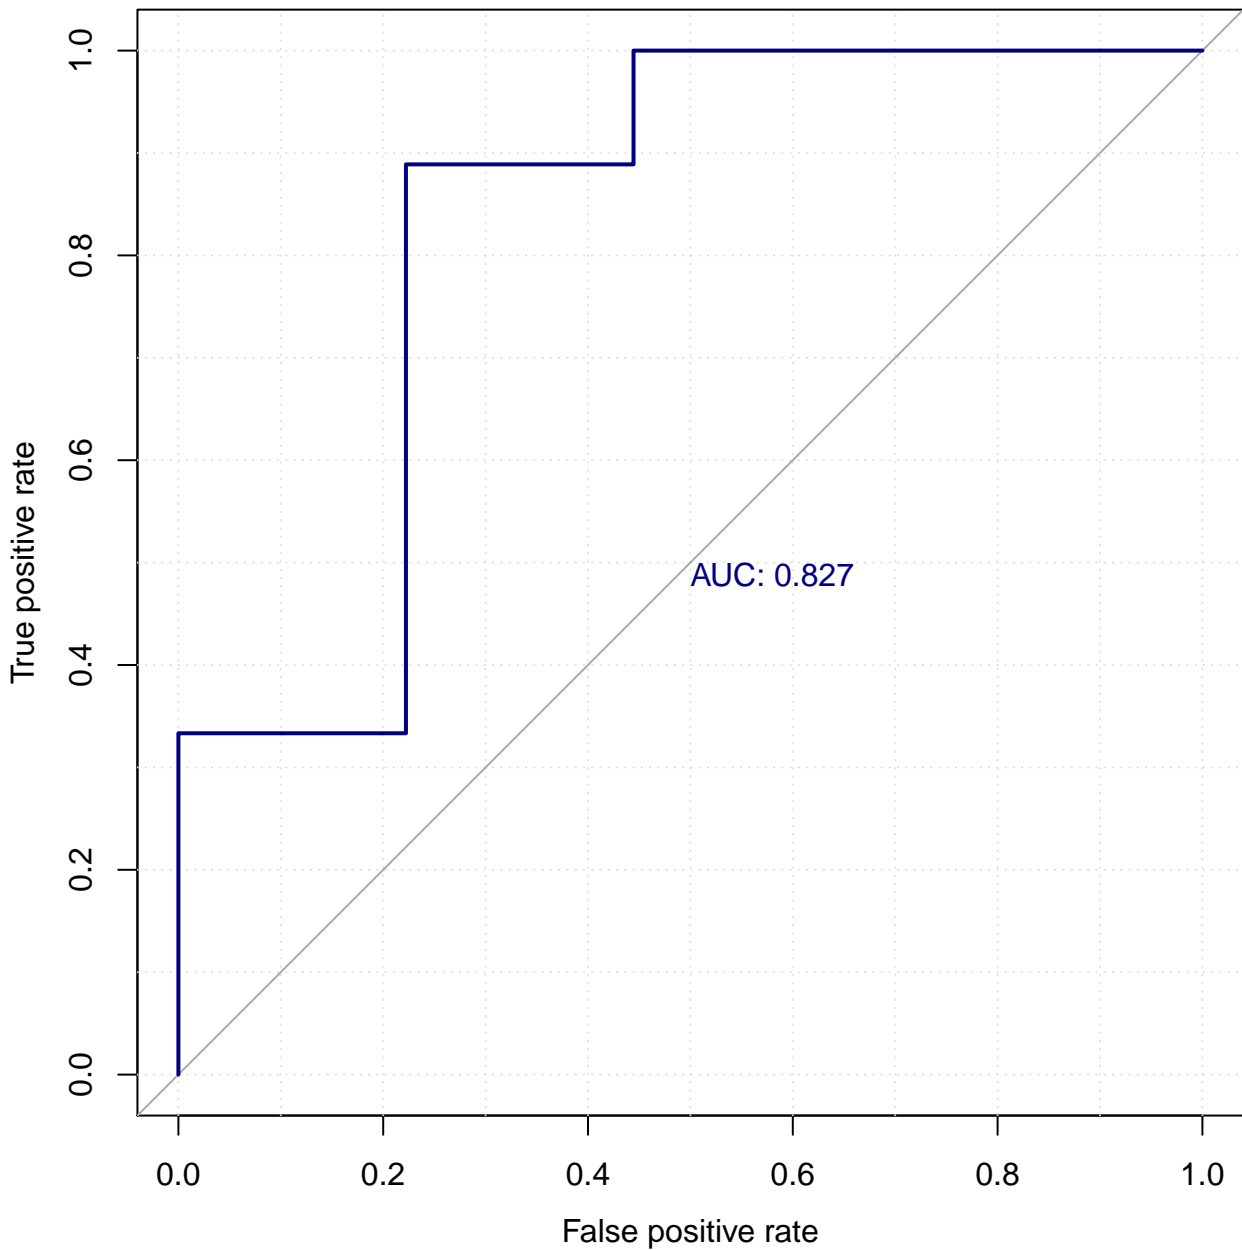

Supplement: RawDataResult.zip [file RawDataResult.zip]

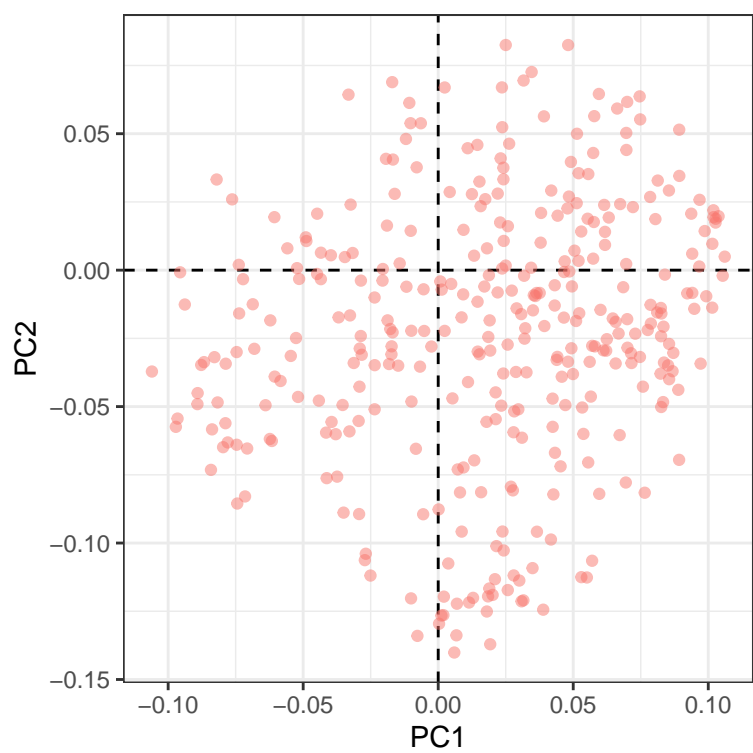

Supplement: RawDataResult.zip [file RawDataResult.zip]

# H.vs.NH

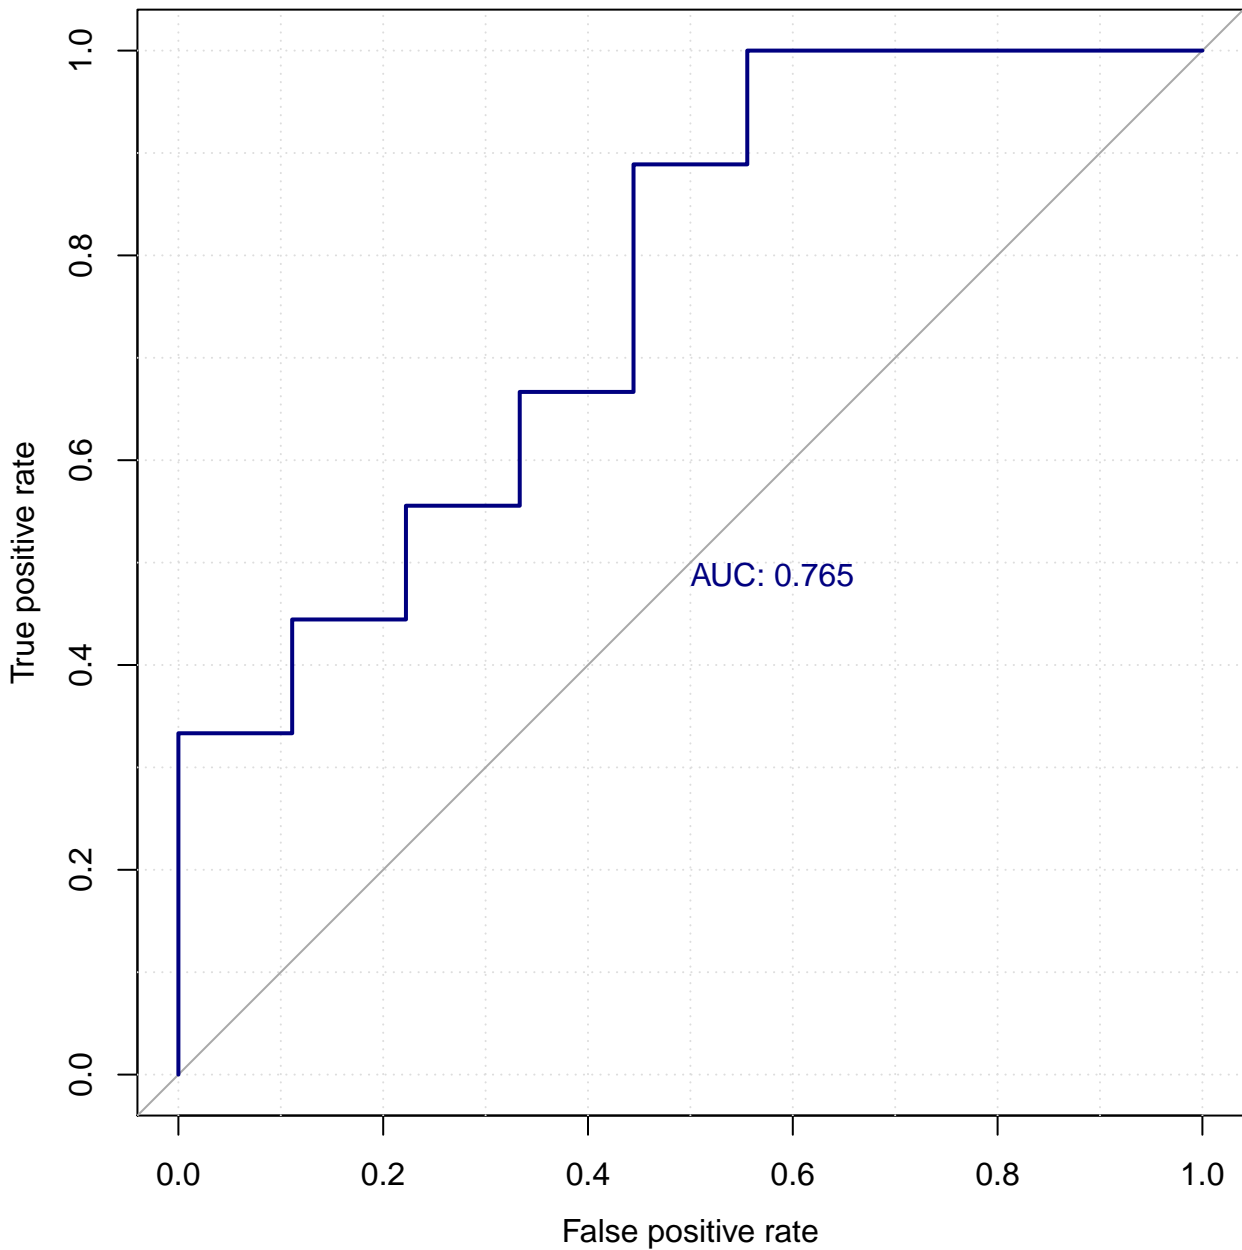

Supplement: RawDataResult.zip [file RawDataResult.zip]

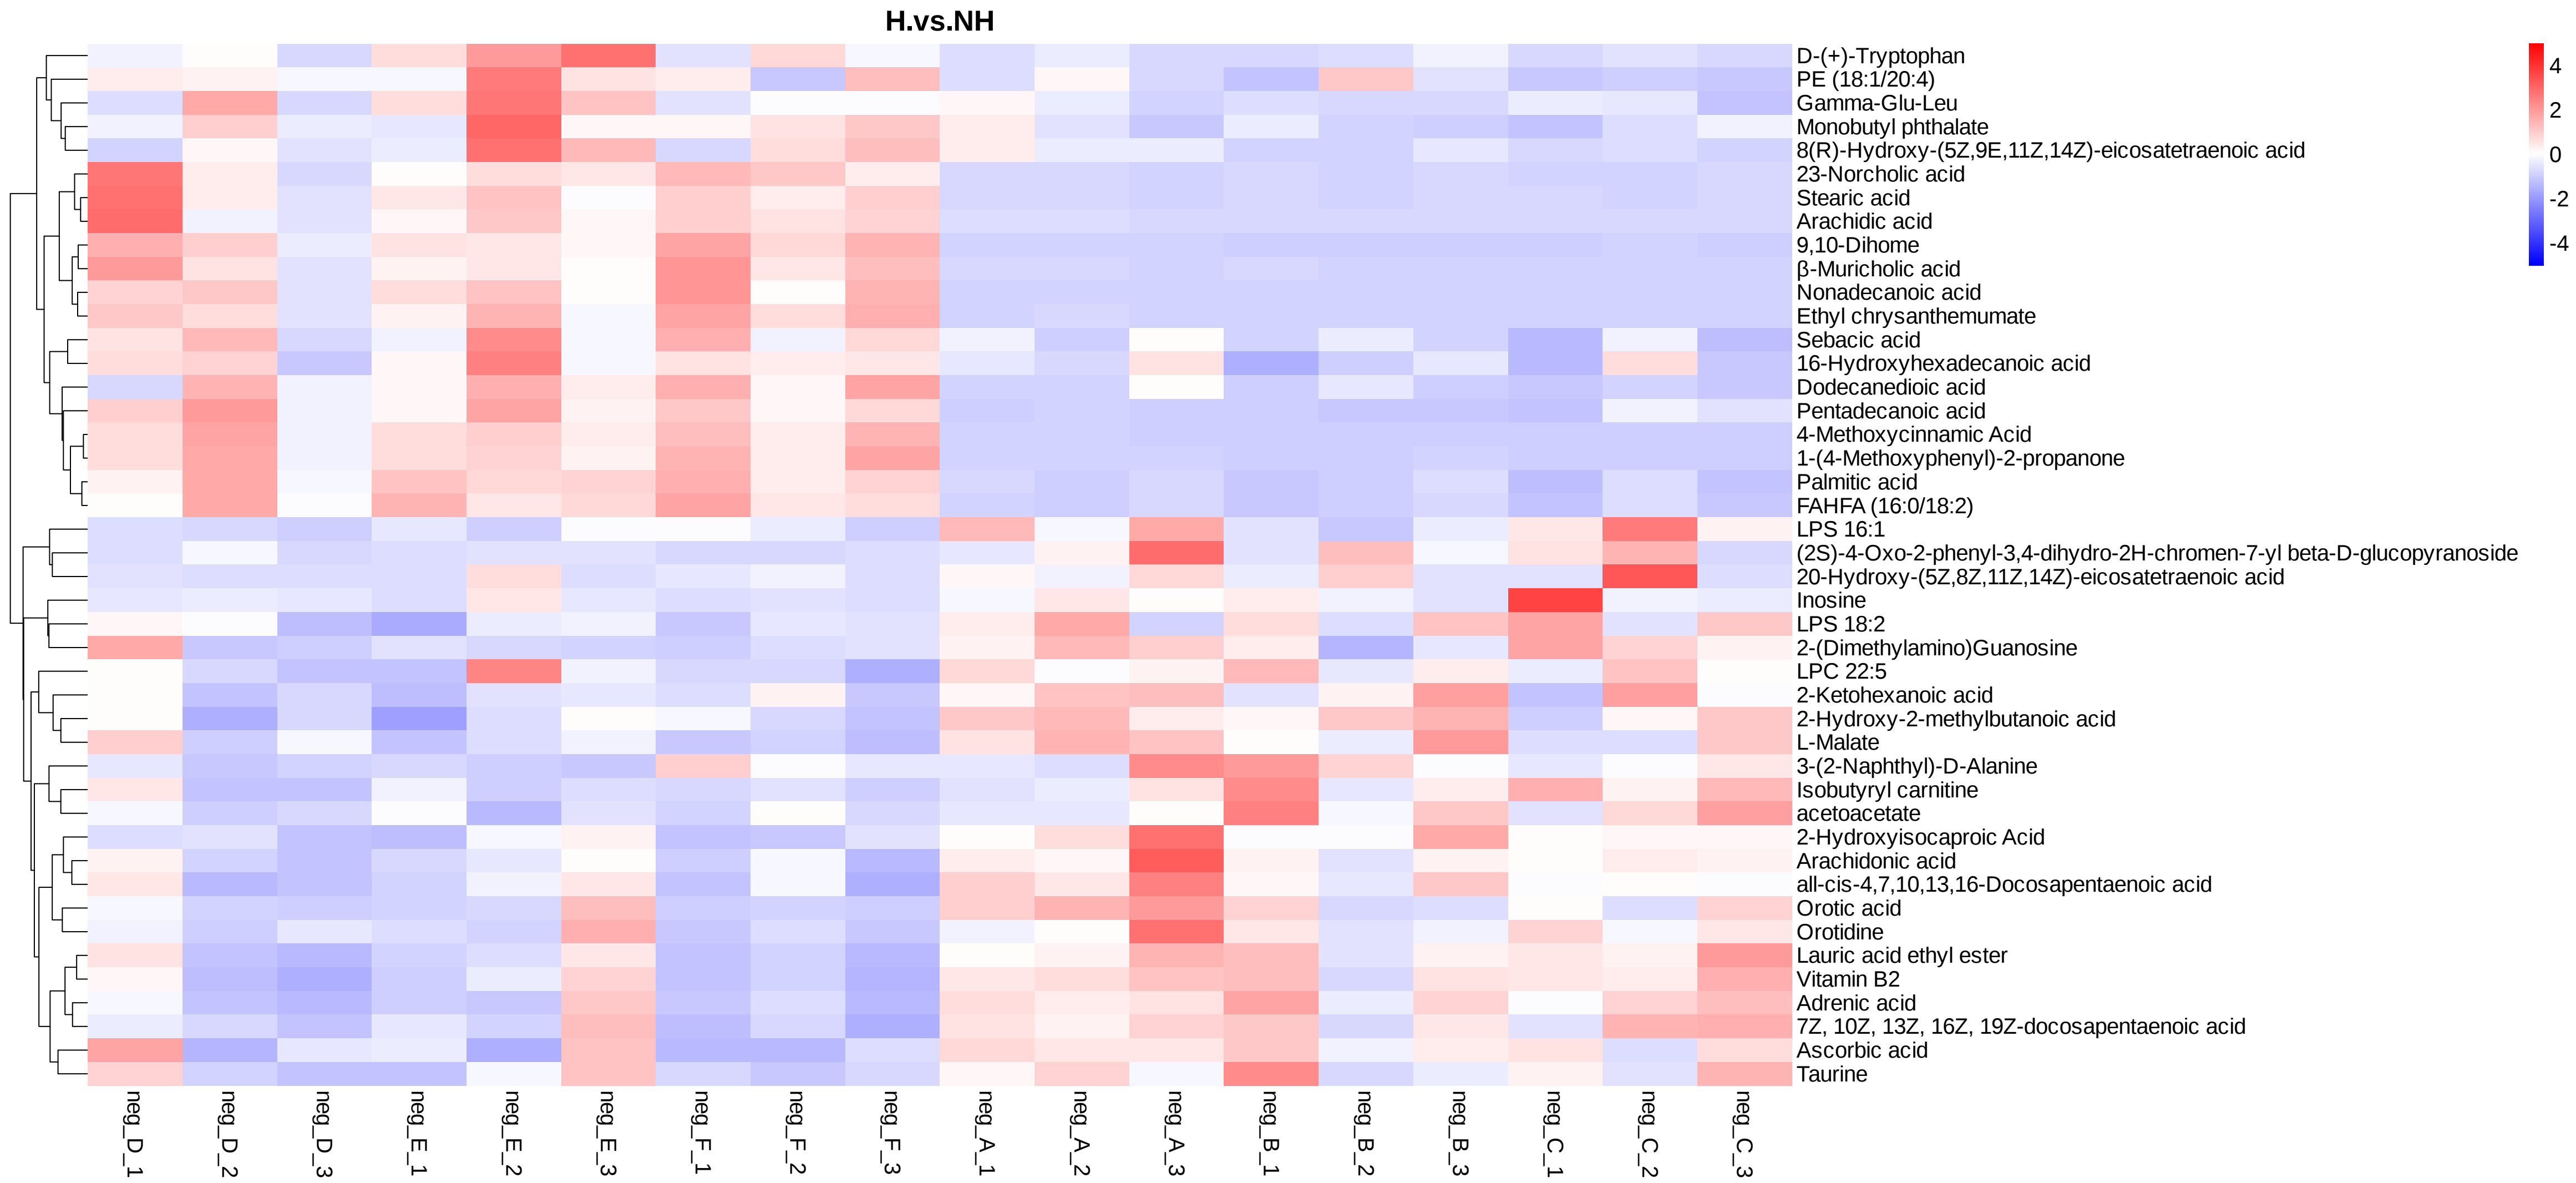

Supplement: RawDataResult.zip [file RawDataResult.zip]

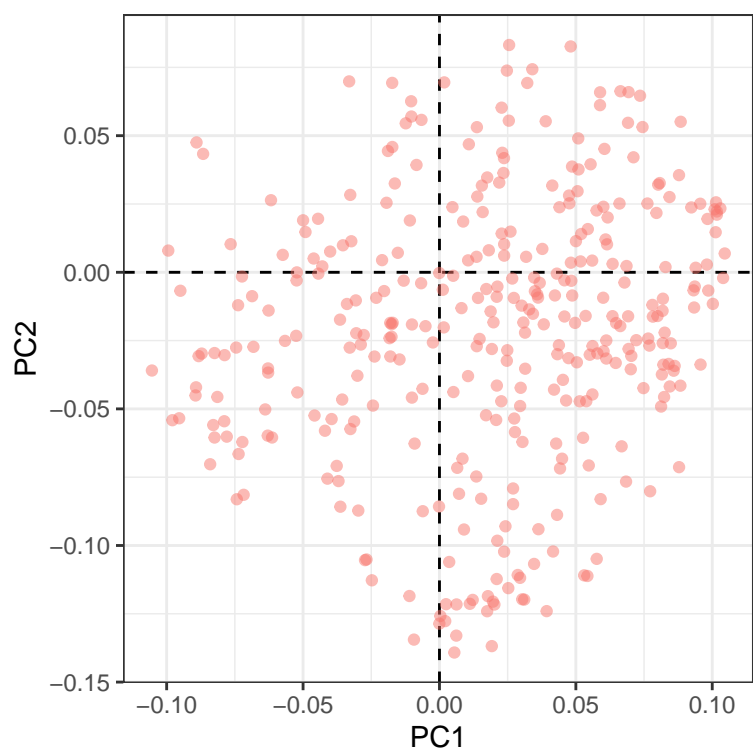

Supplement: RawDataResult.zip [file RawDataResult.zip]

# H.vs.NH

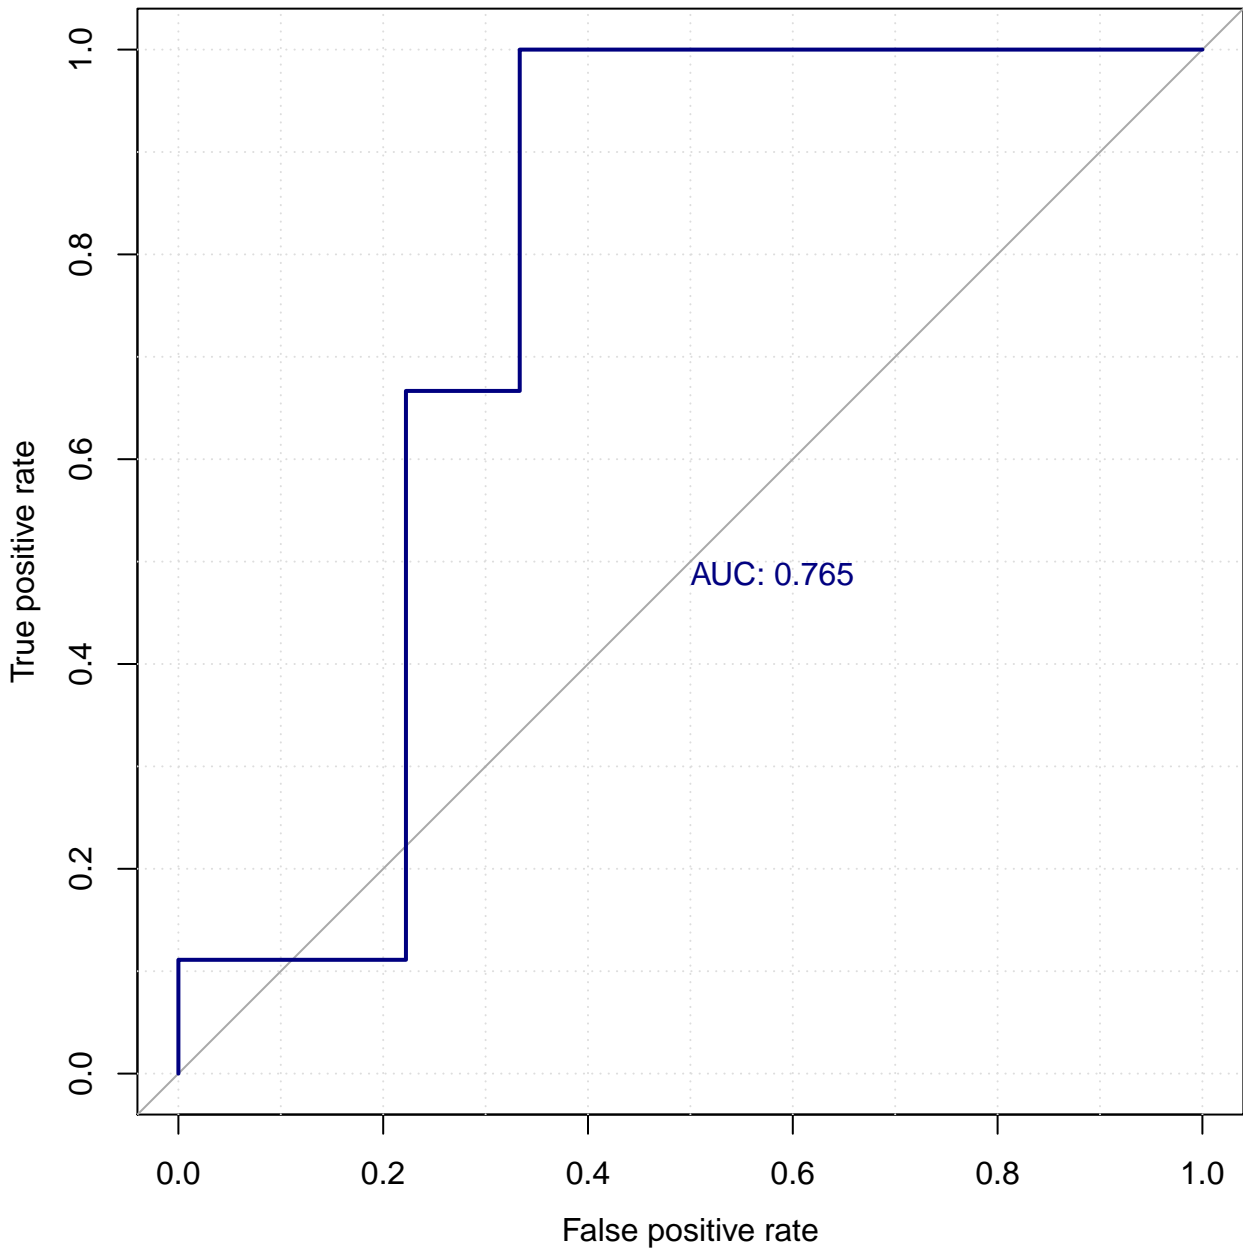

Supplement: RawDataResult.zip [file RawDataResult.zip]

# H.vs.NH

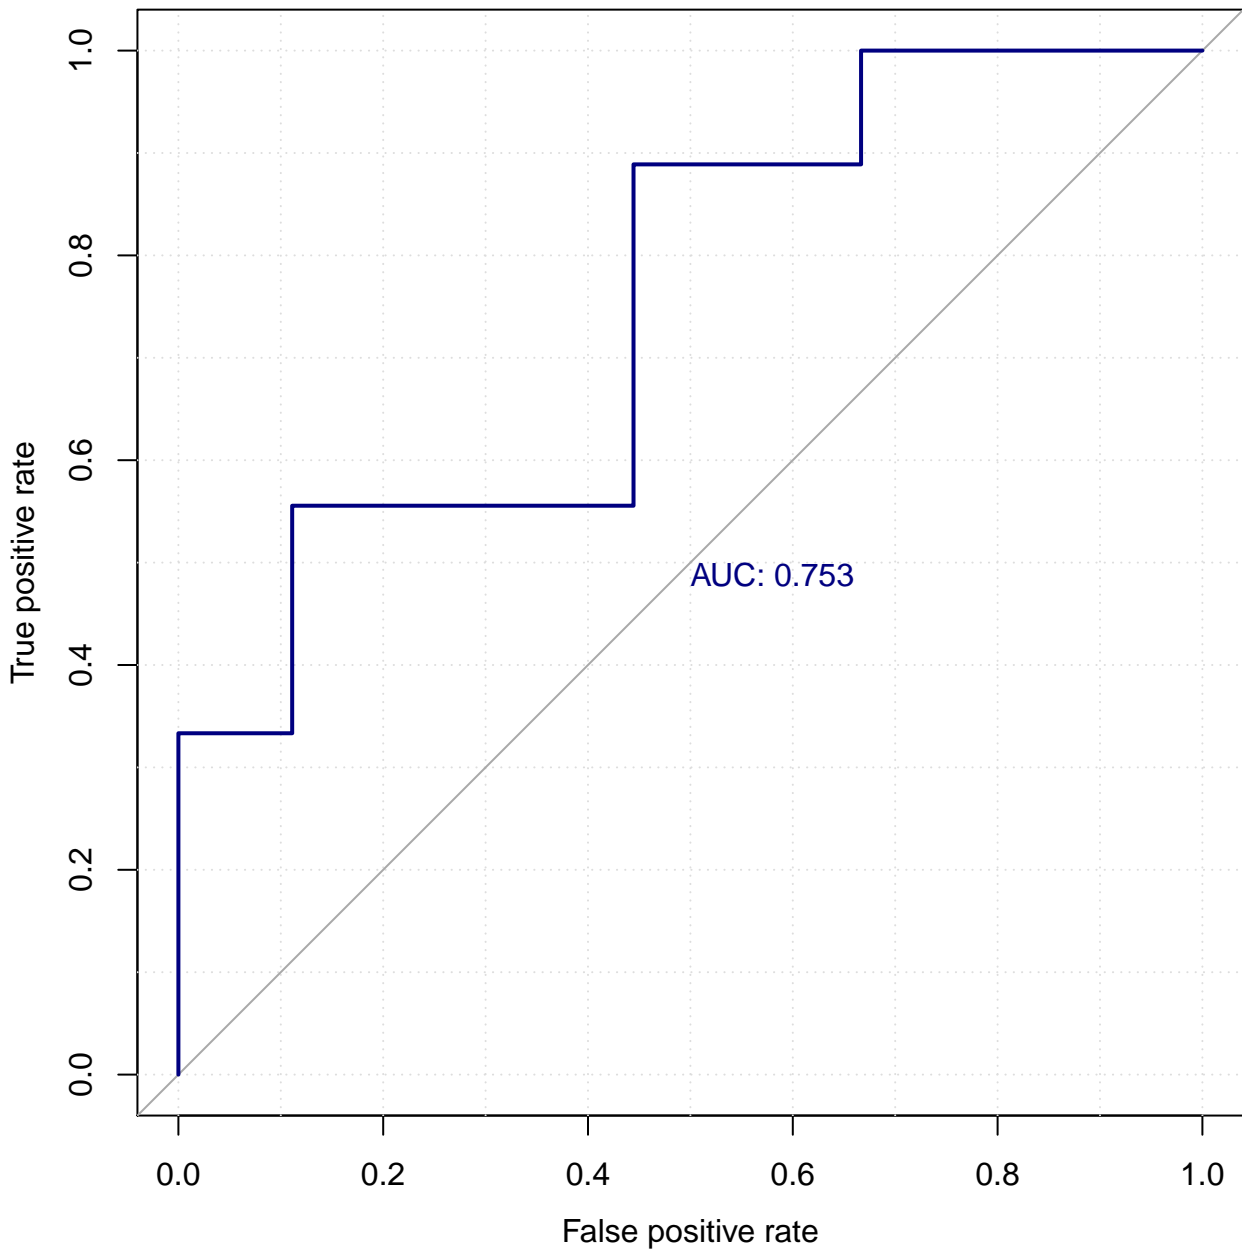

Supplement: RawDataResult.zip [file RawDataResult.zip]

# H.vs.NH

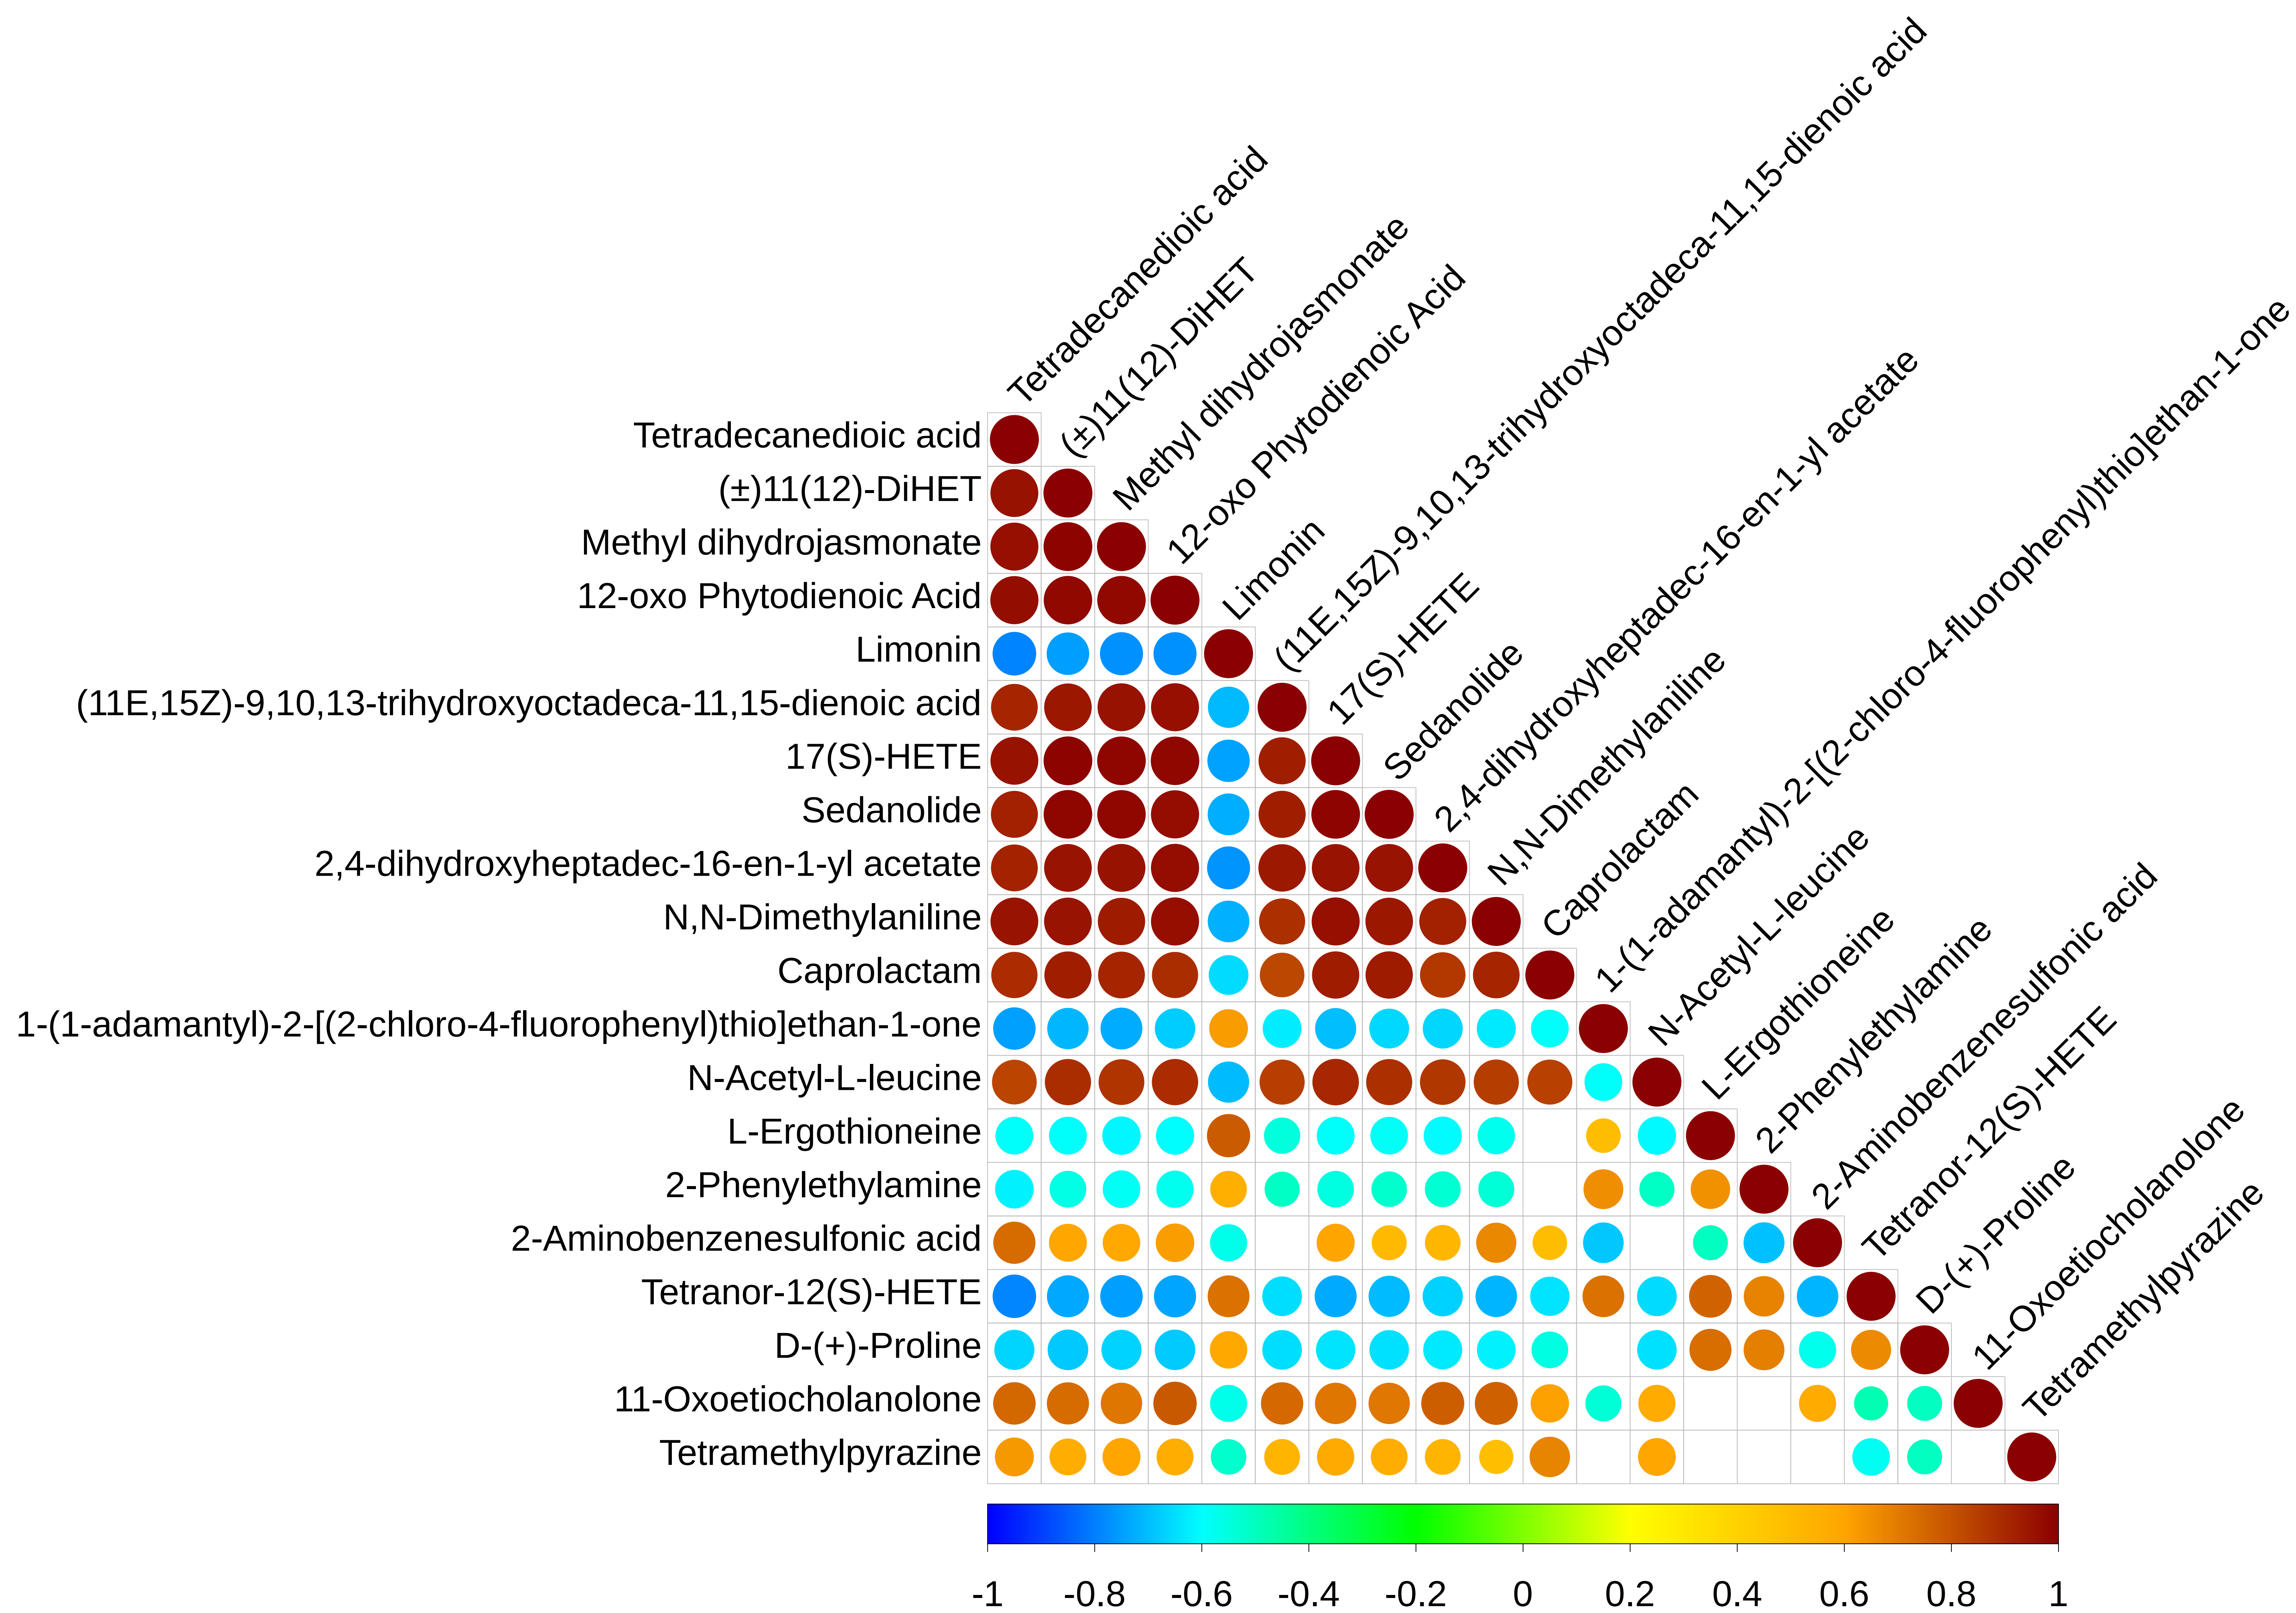

Supplement: RawDataResult.zip [file RawDataResult.zip]

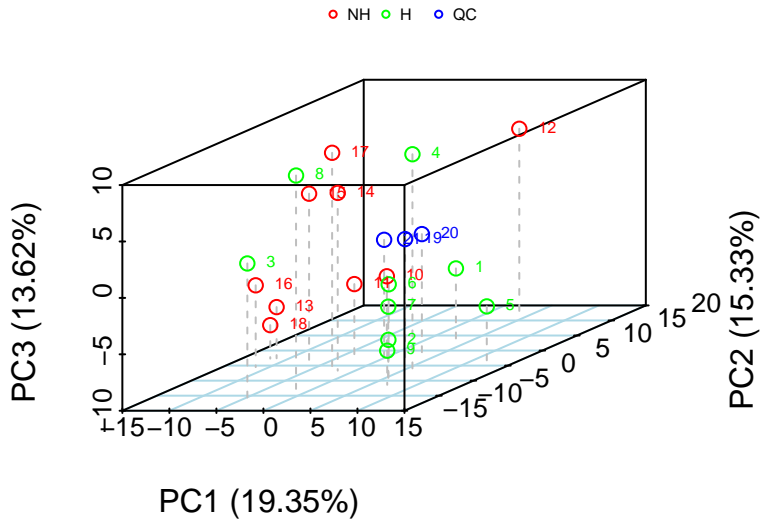

Supplement: RawDataResult.zip [file RawDataResult.zip]

class    H    NH

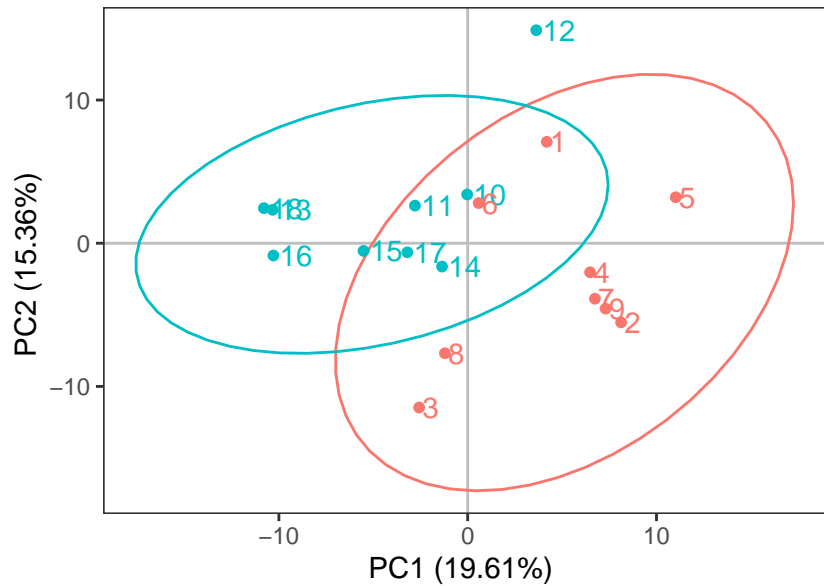

Supplement: RawDataResult.zip [file RawDataResult.zip]

H.vs.NH

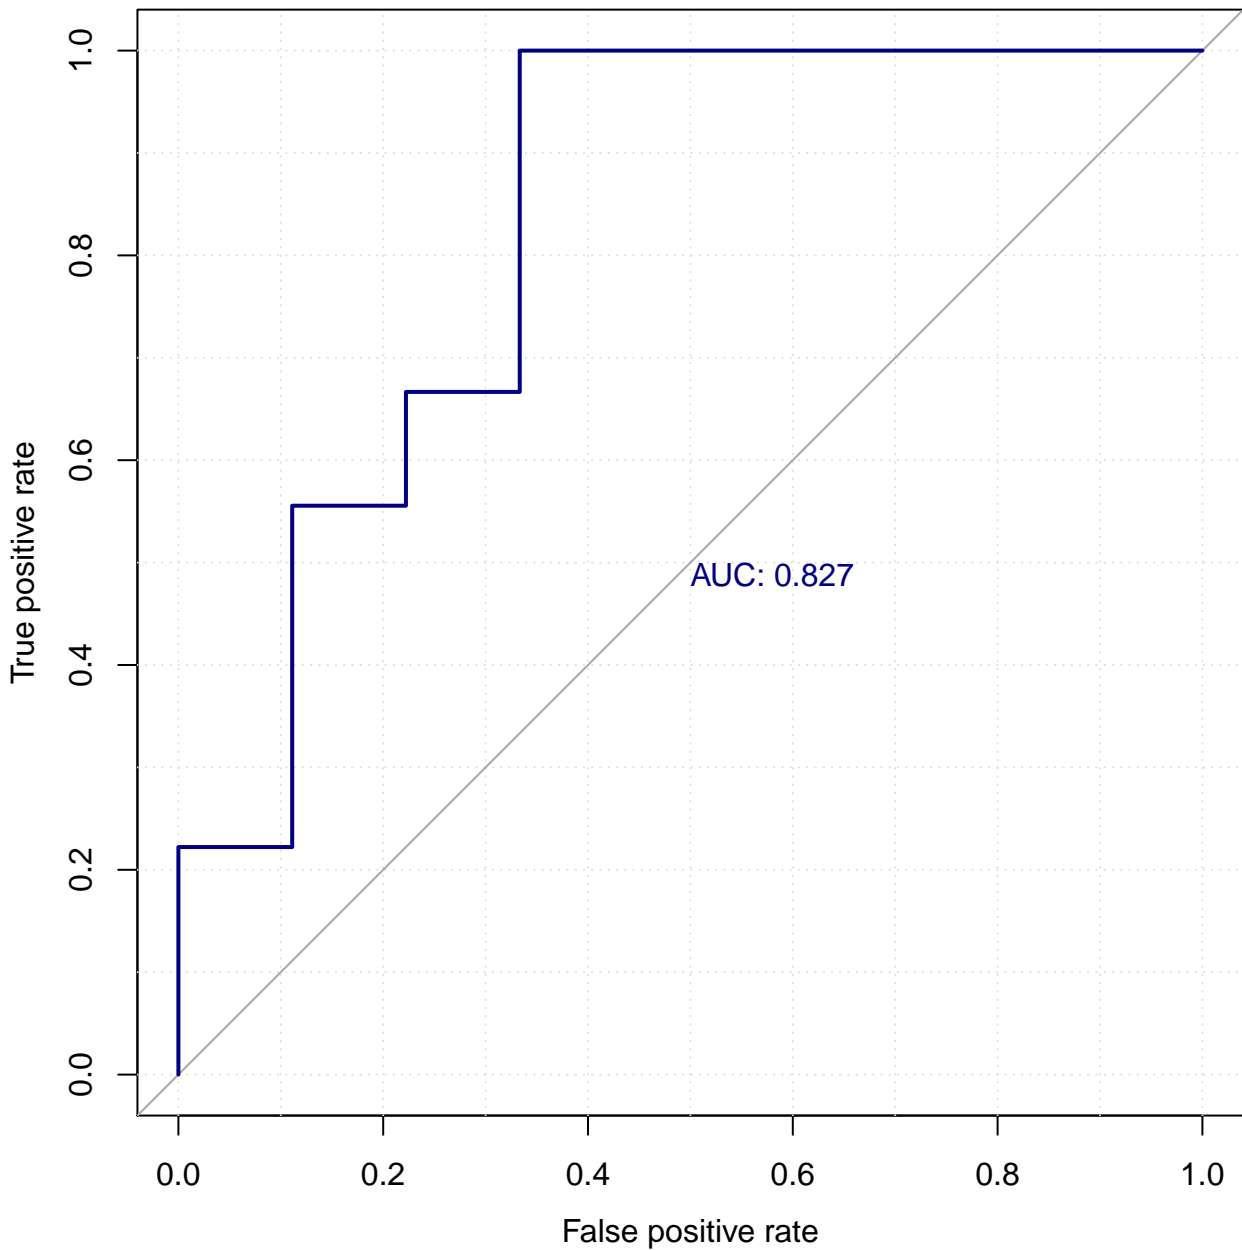

Supplement: RawDataResult.zip [file RawDataResult.zip]

# H.vs.NH

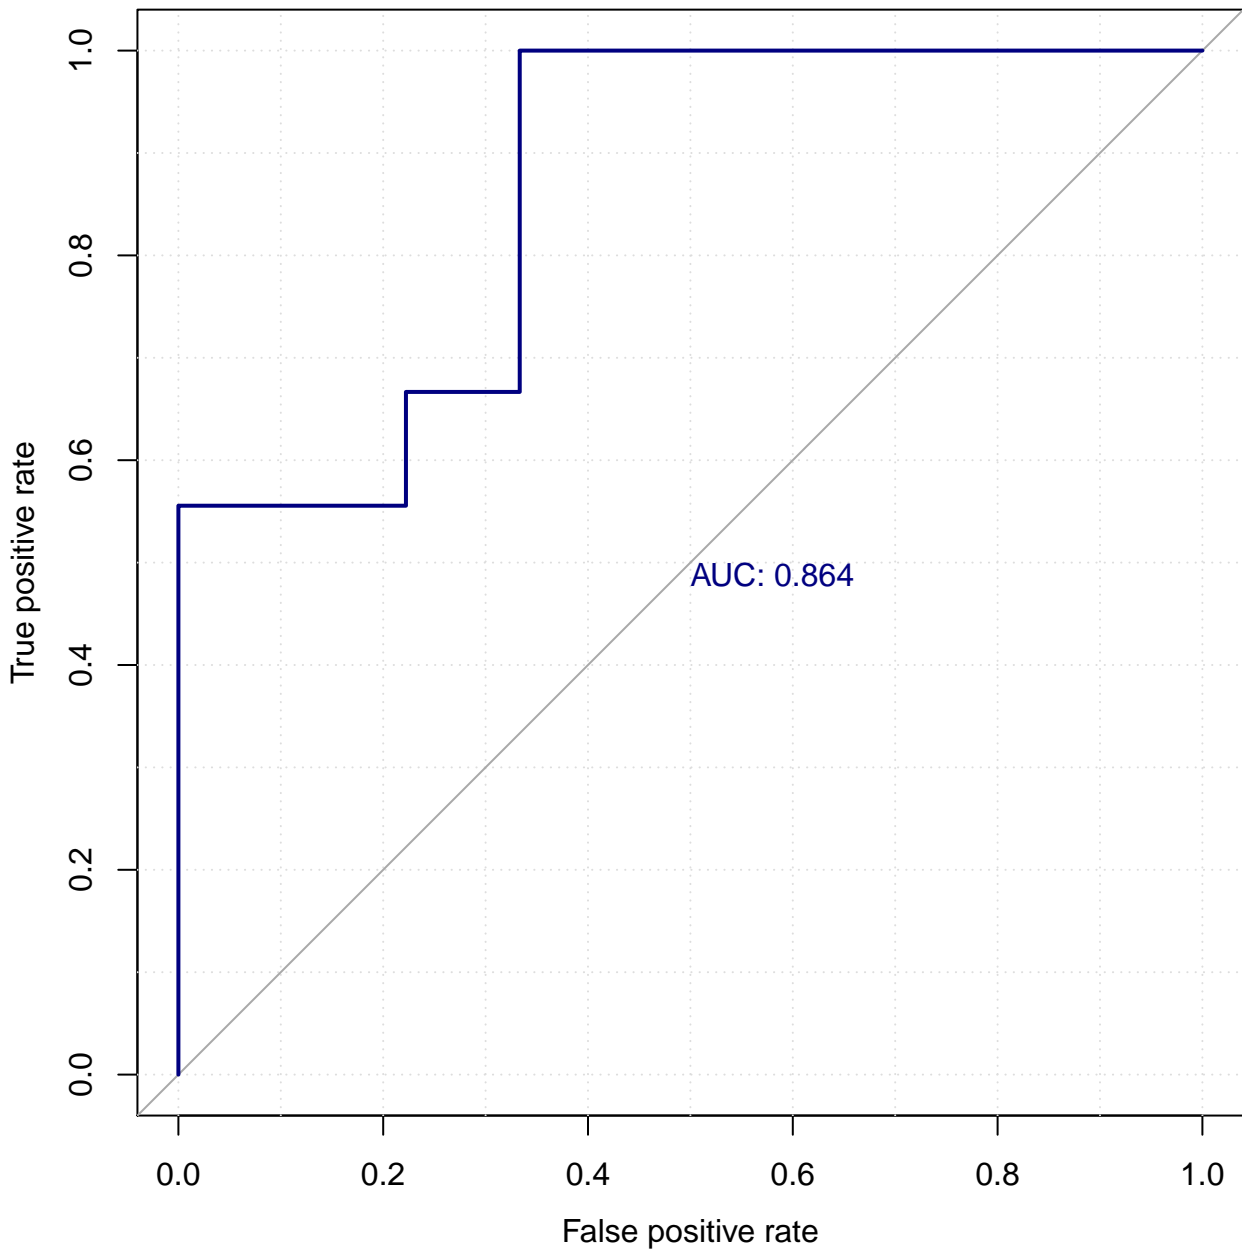

Supplement: RawDataResult.zip [file RawDataResult.zip]

# H.vs.NH

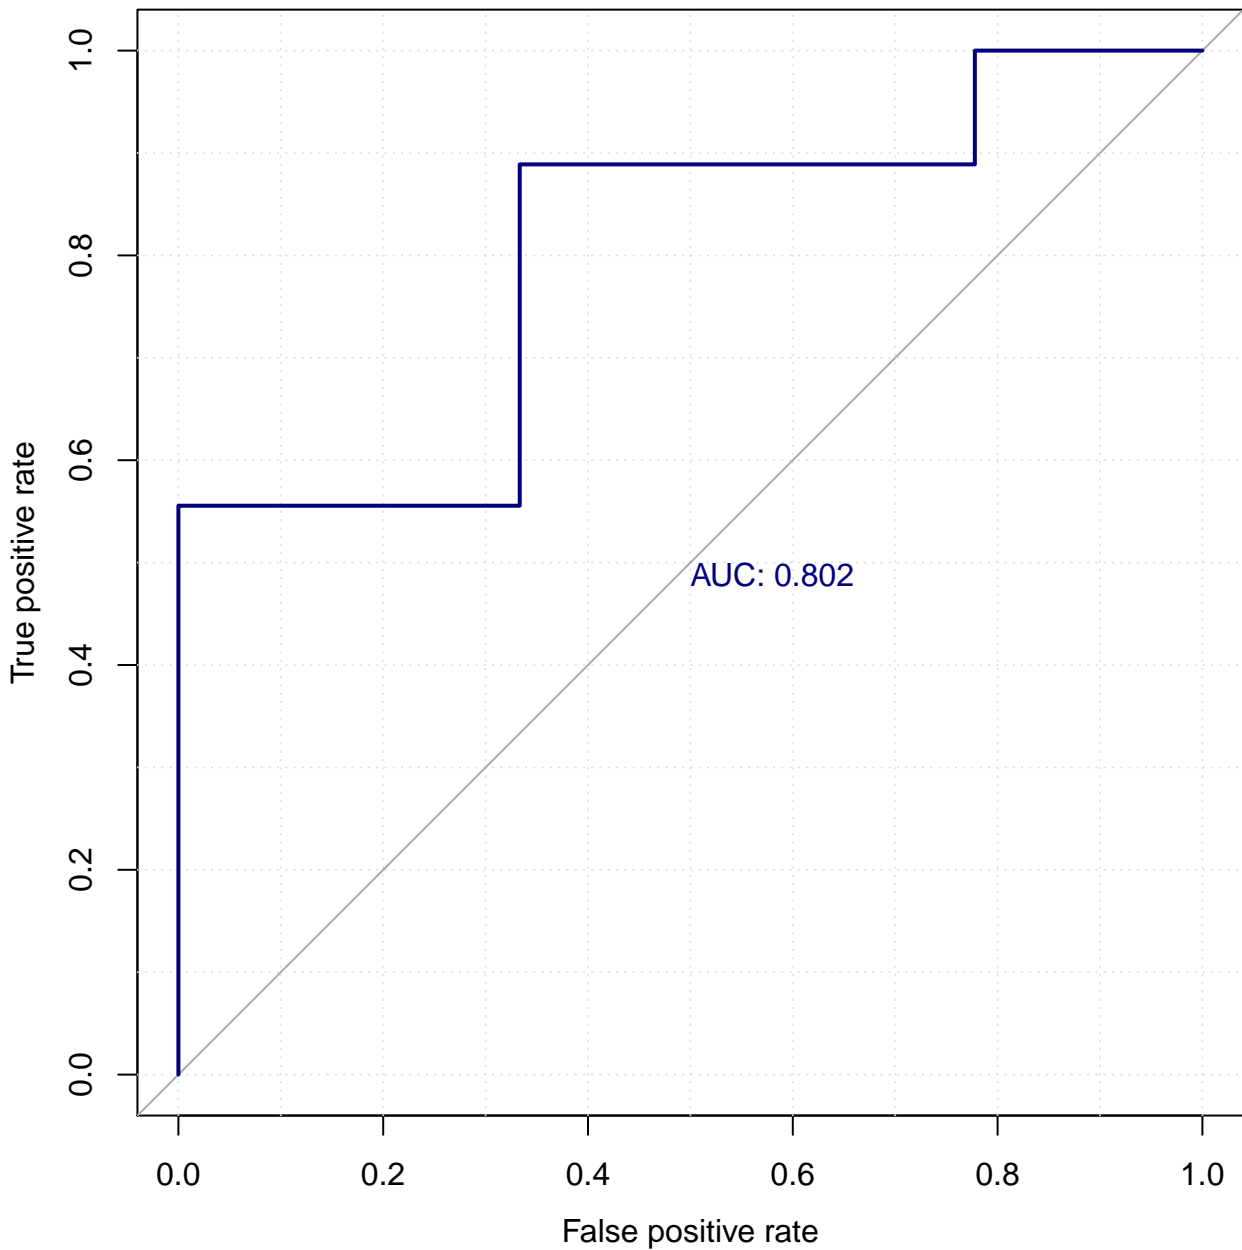

Supplement: RawDataResult.zip [file RawDataResult.zip]

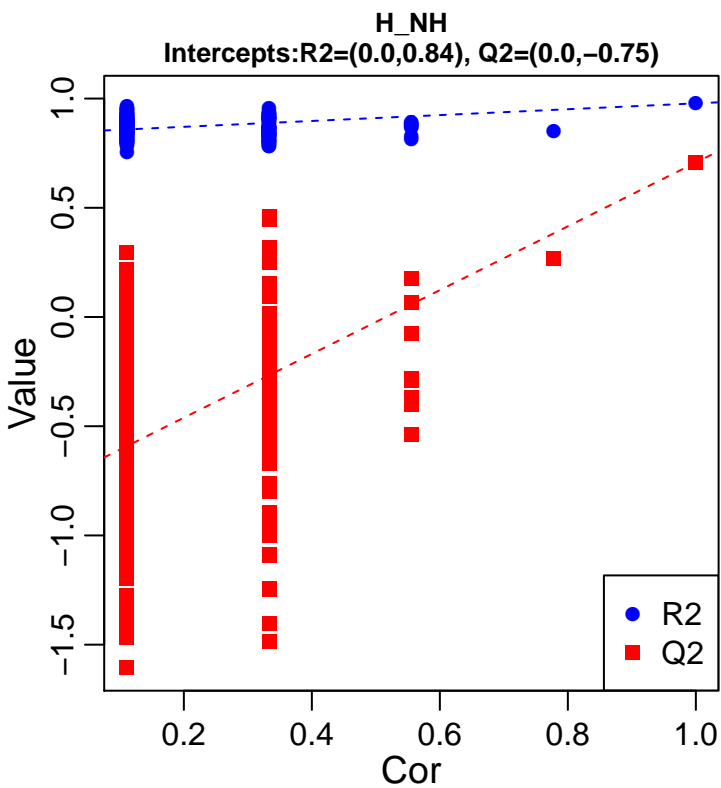

Supplement: RawDataResult.zip [file RawDataResult.zip]

class    ● H    ● NH

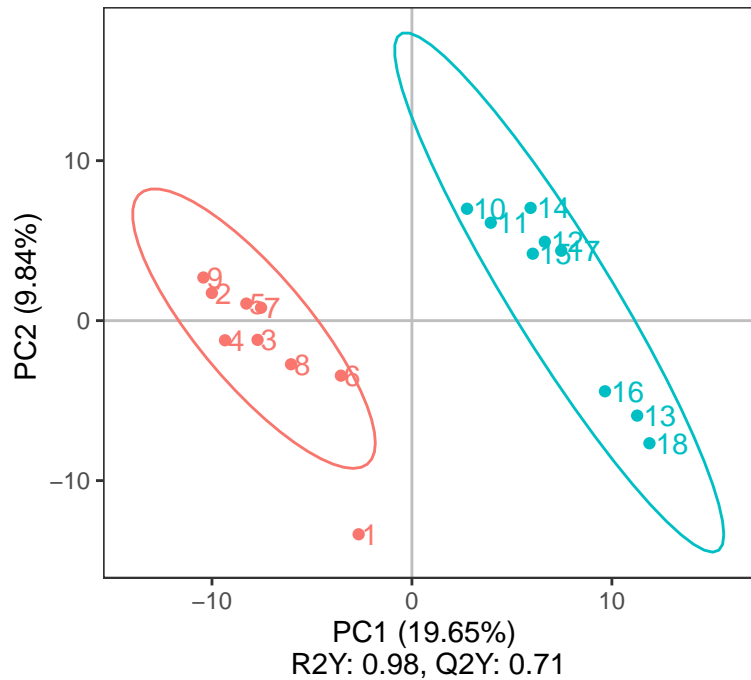

Supplement: RawDataResult.zip [file RawDataResult.zip]

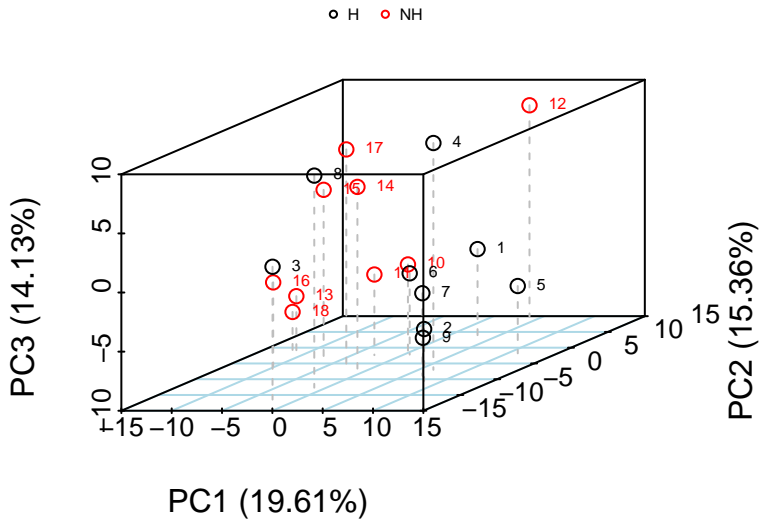

Supplement: RawDataResult.zip [file RawDataResult.zip]

H.vs.NH

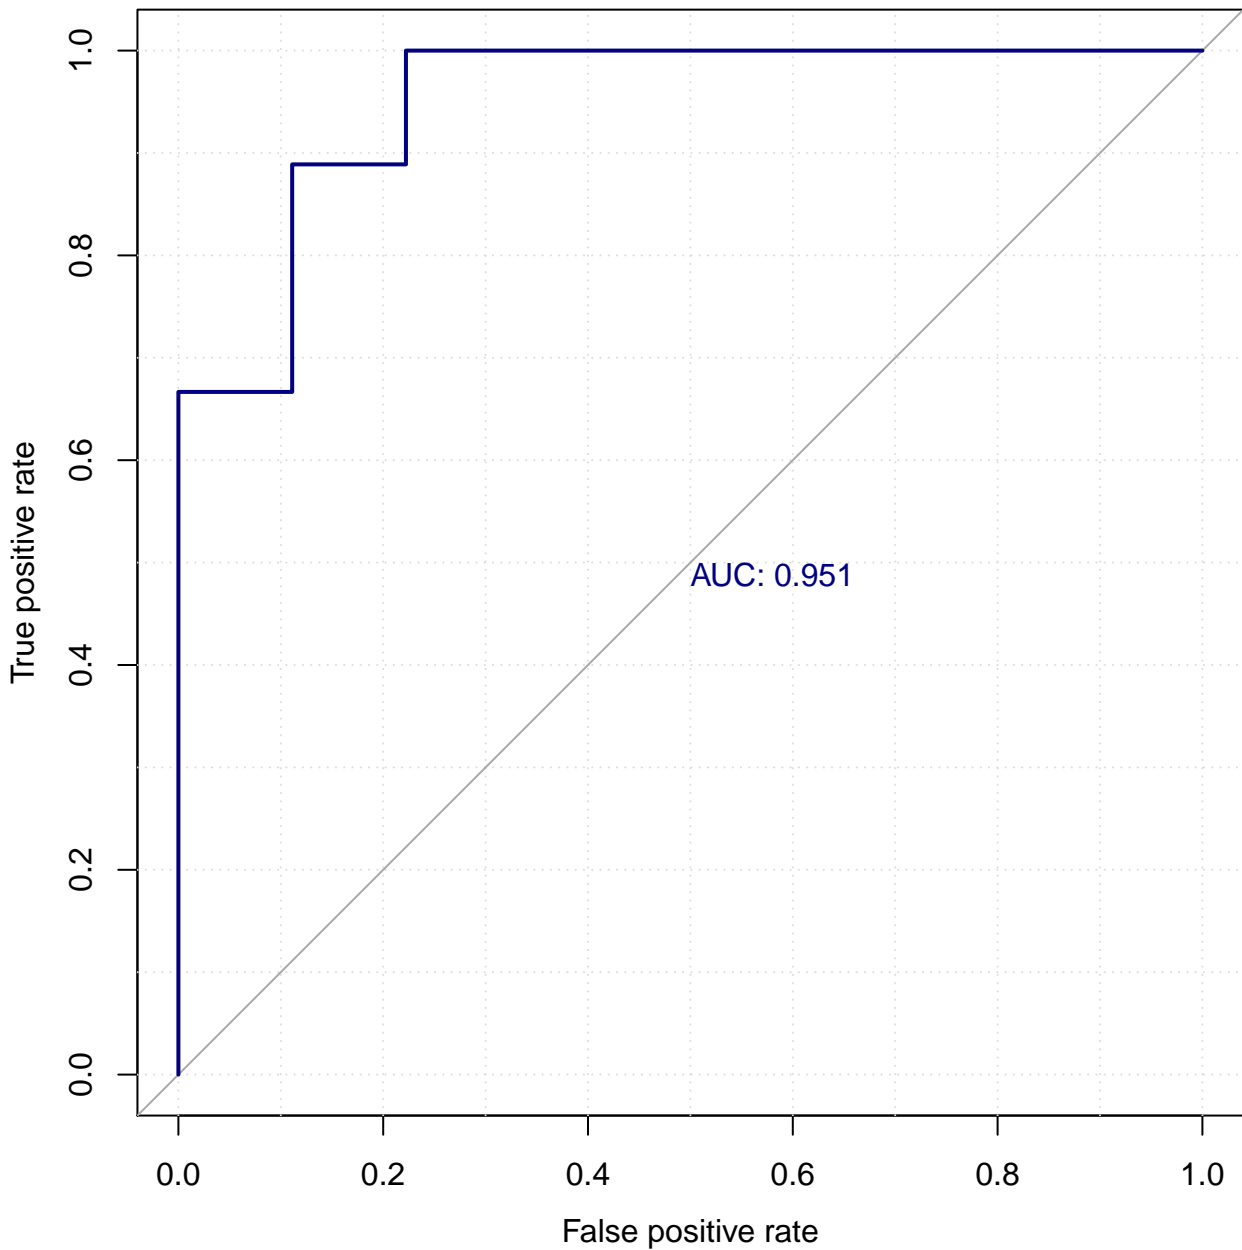

Supplement: RawDataResult.zip [file RawDataResult.zip]

class     H     NH

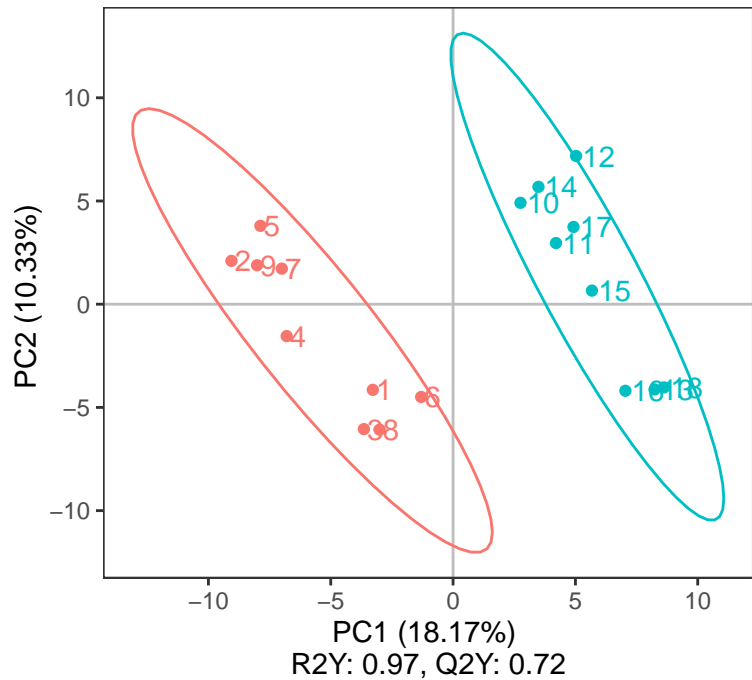

Supplement: RawDataResult.zip [file RawDataResult.zip]

# H.vs.NH

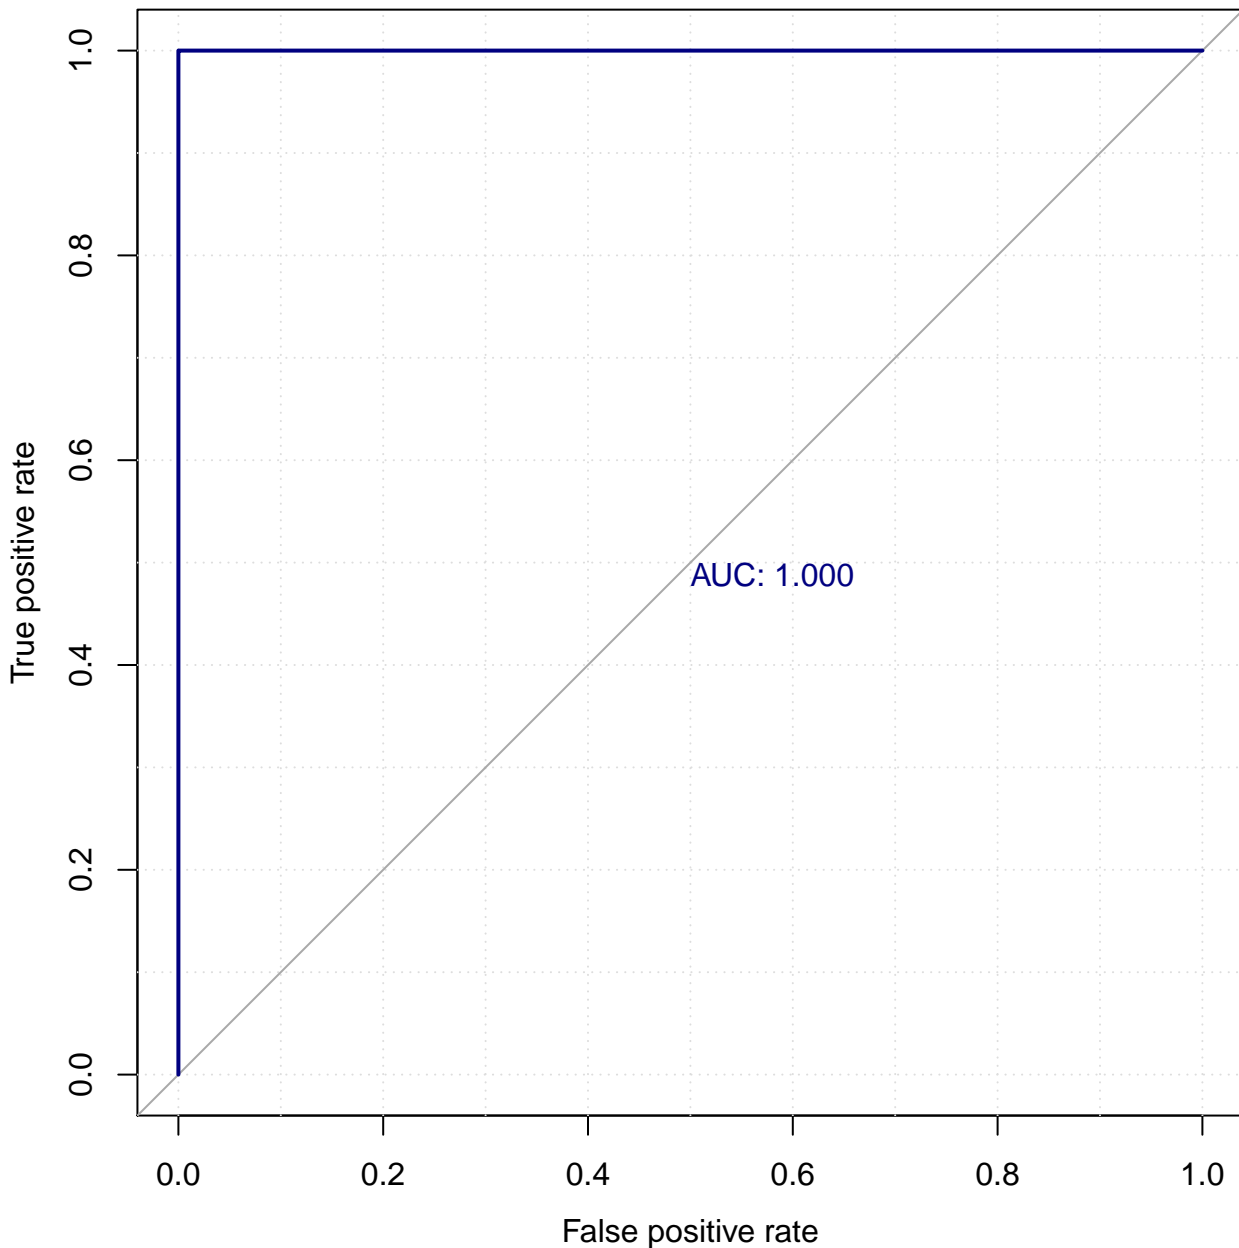

Supplement: RawDataResult.zip [file RawDataResult.zip]



Supplement: RawDataResult.zip [file RawDataResult.zip]

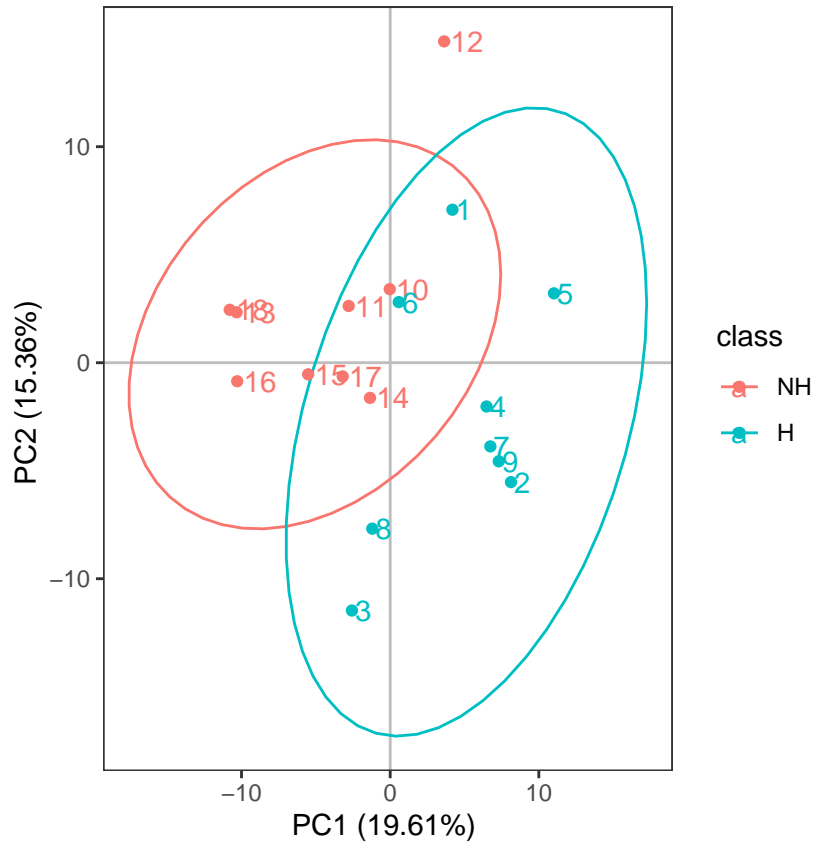

Supplement: RawDataResult.zip [file RawDataResult.zip]

# H.vs.NH

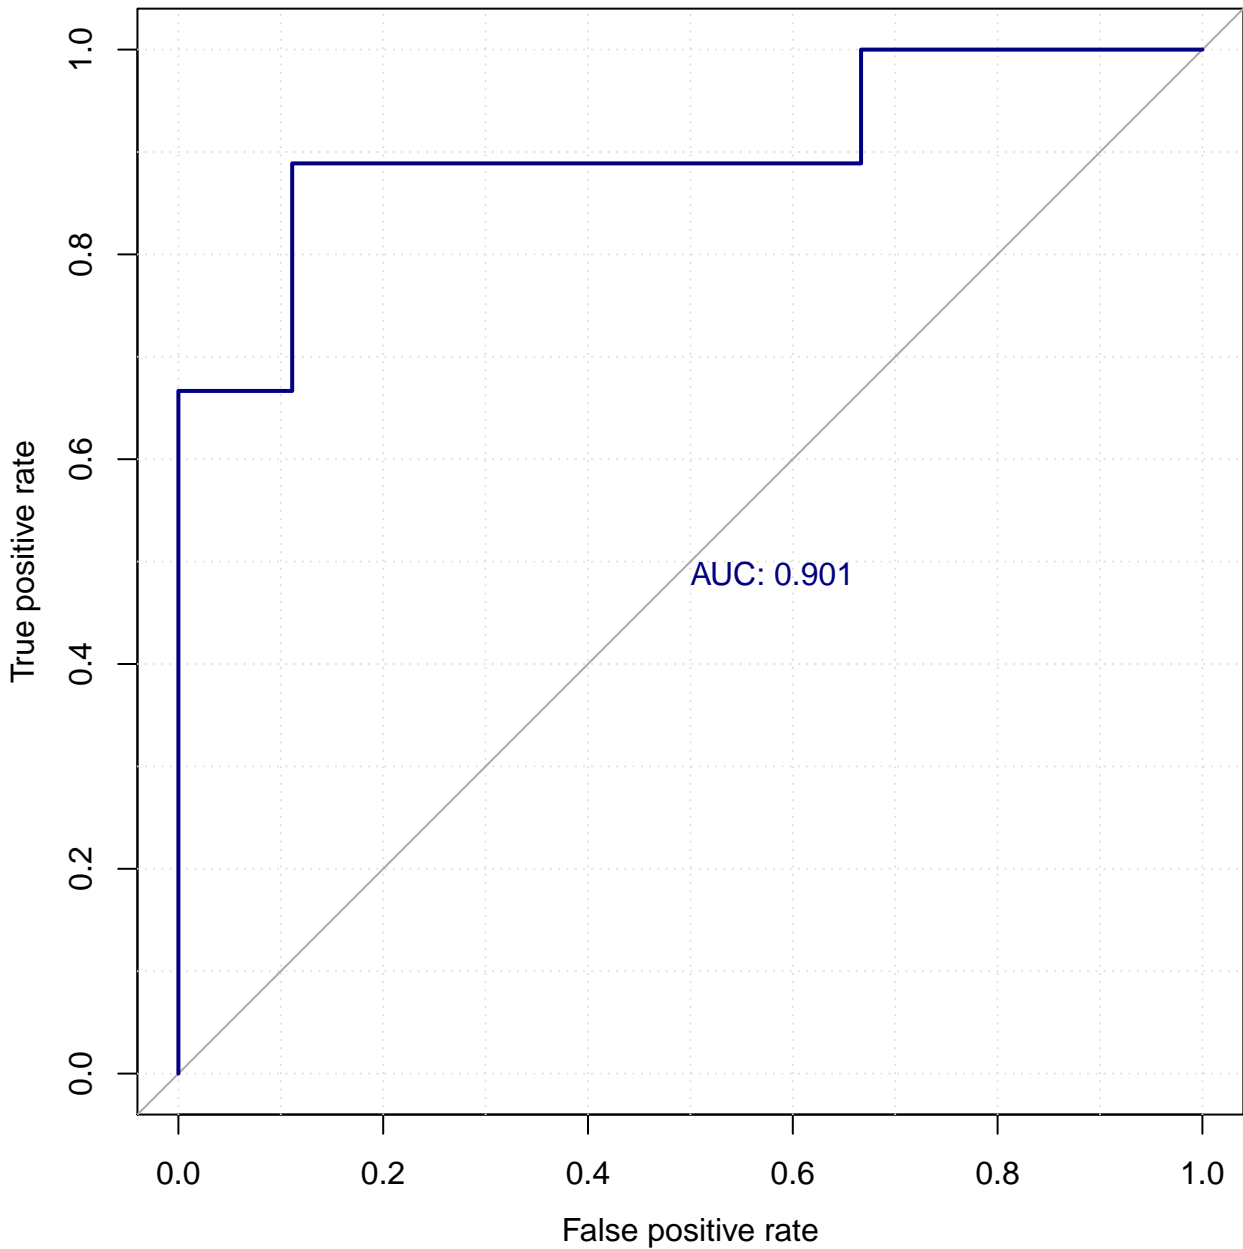

Supplement: RawDataResult.zip [file RawDataResult.zip]

Pearson correlation between pos QC samples

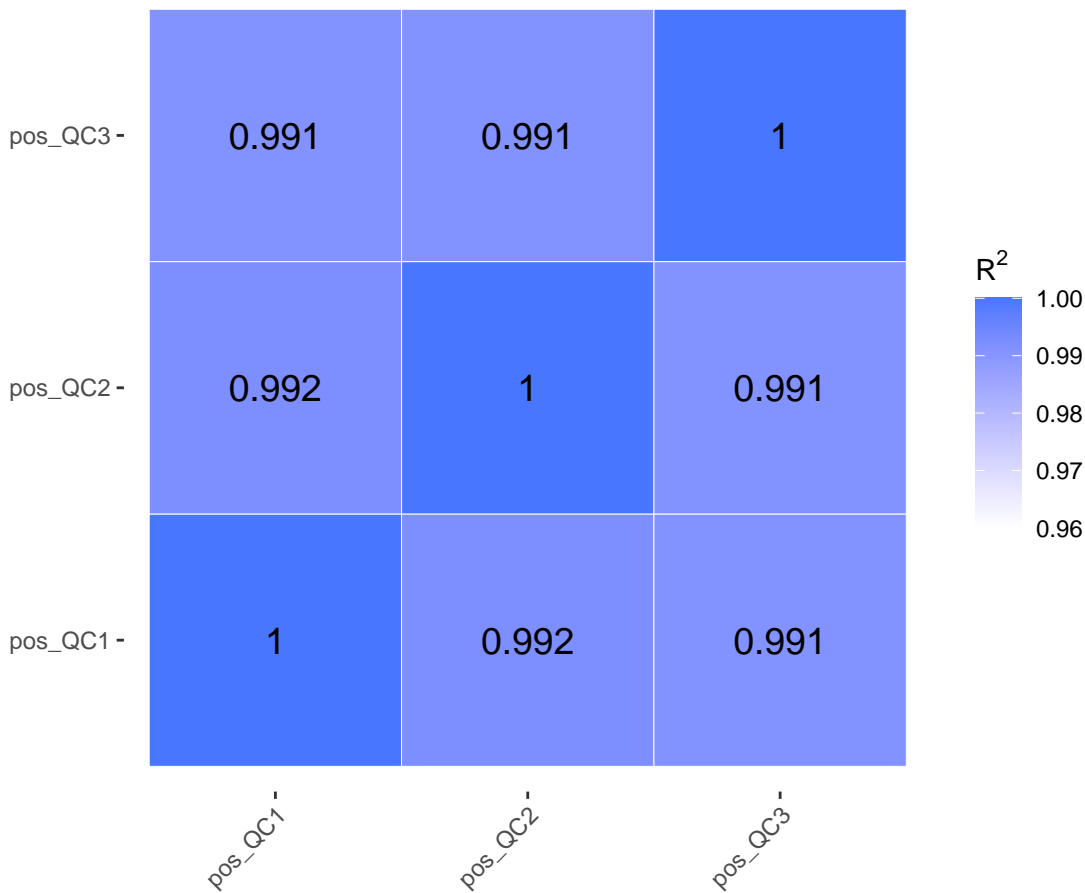

Supplement: RawDataResult.zip [file RawDataResult.zip]

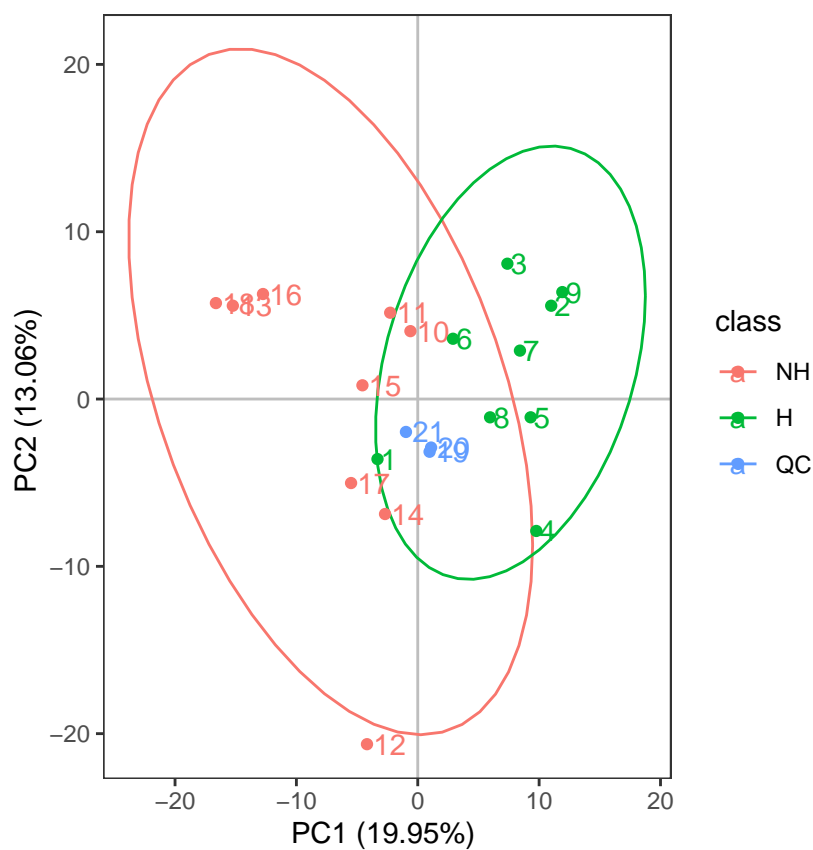

Supplement: RawDataResult.zip [file RawDataResult.zip]

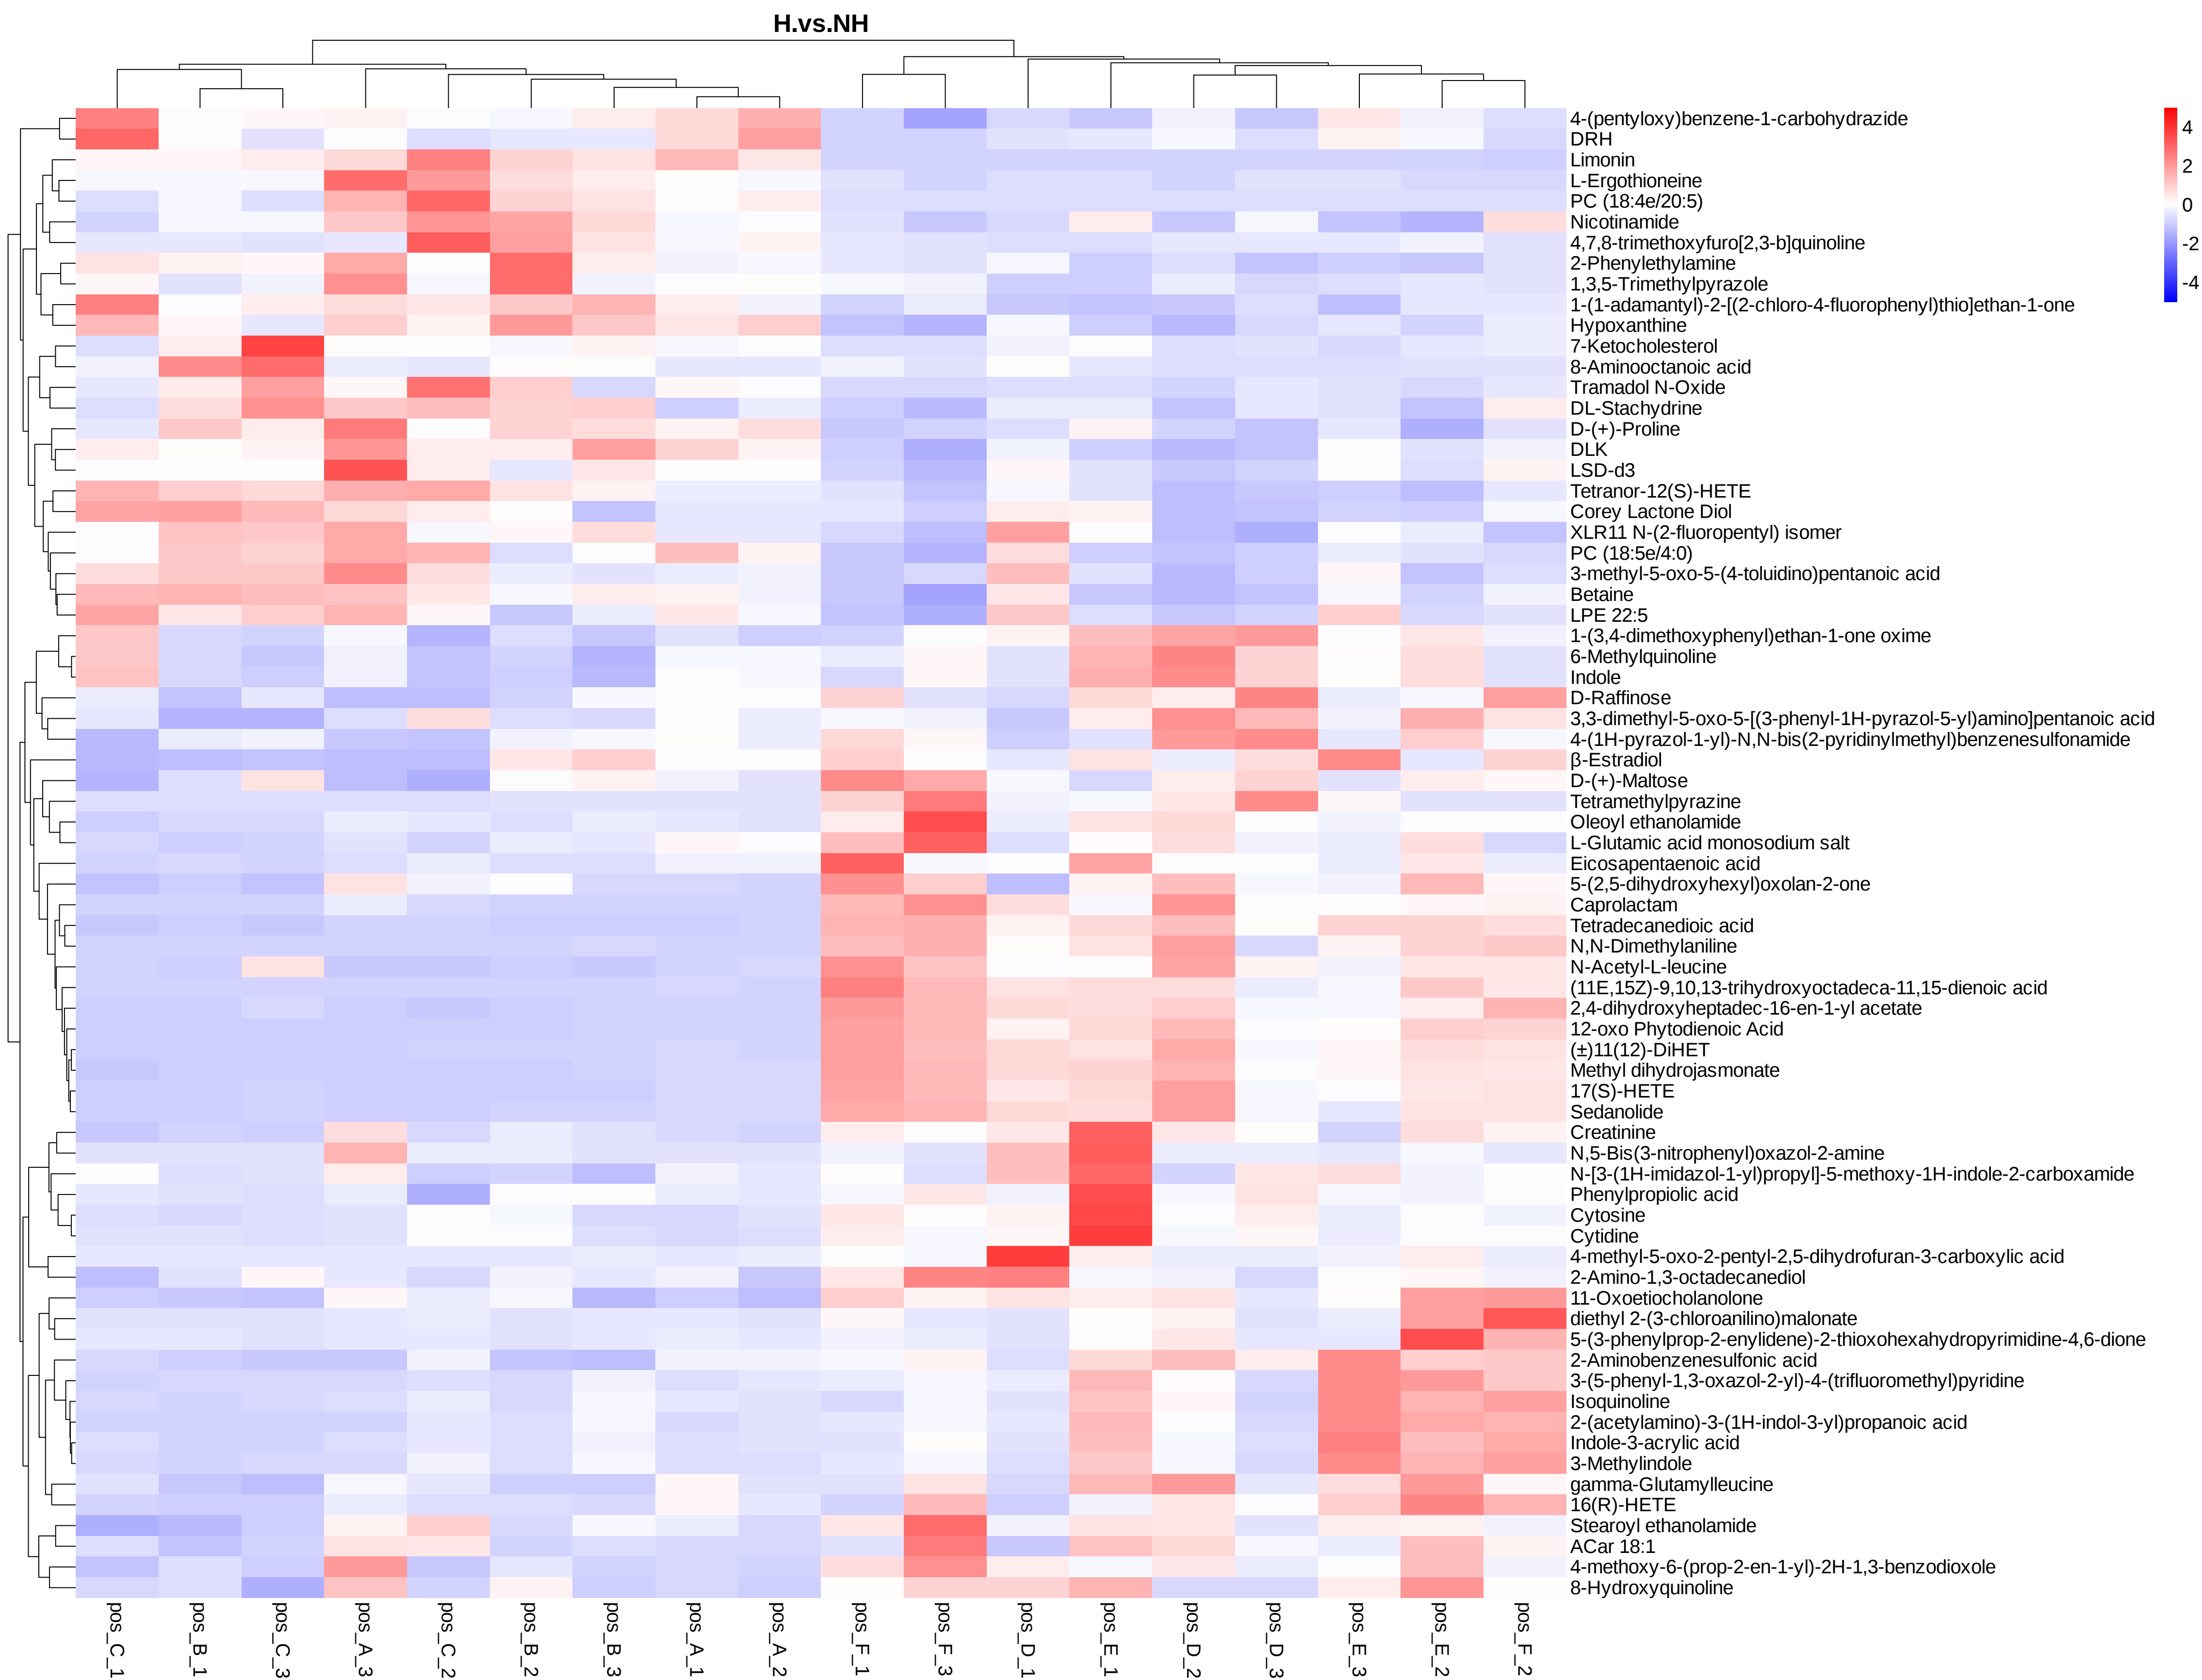

Supplement: RawDataResult.zip [file RawDataResult.zip]

# H.vs.NH\_neg

Terms

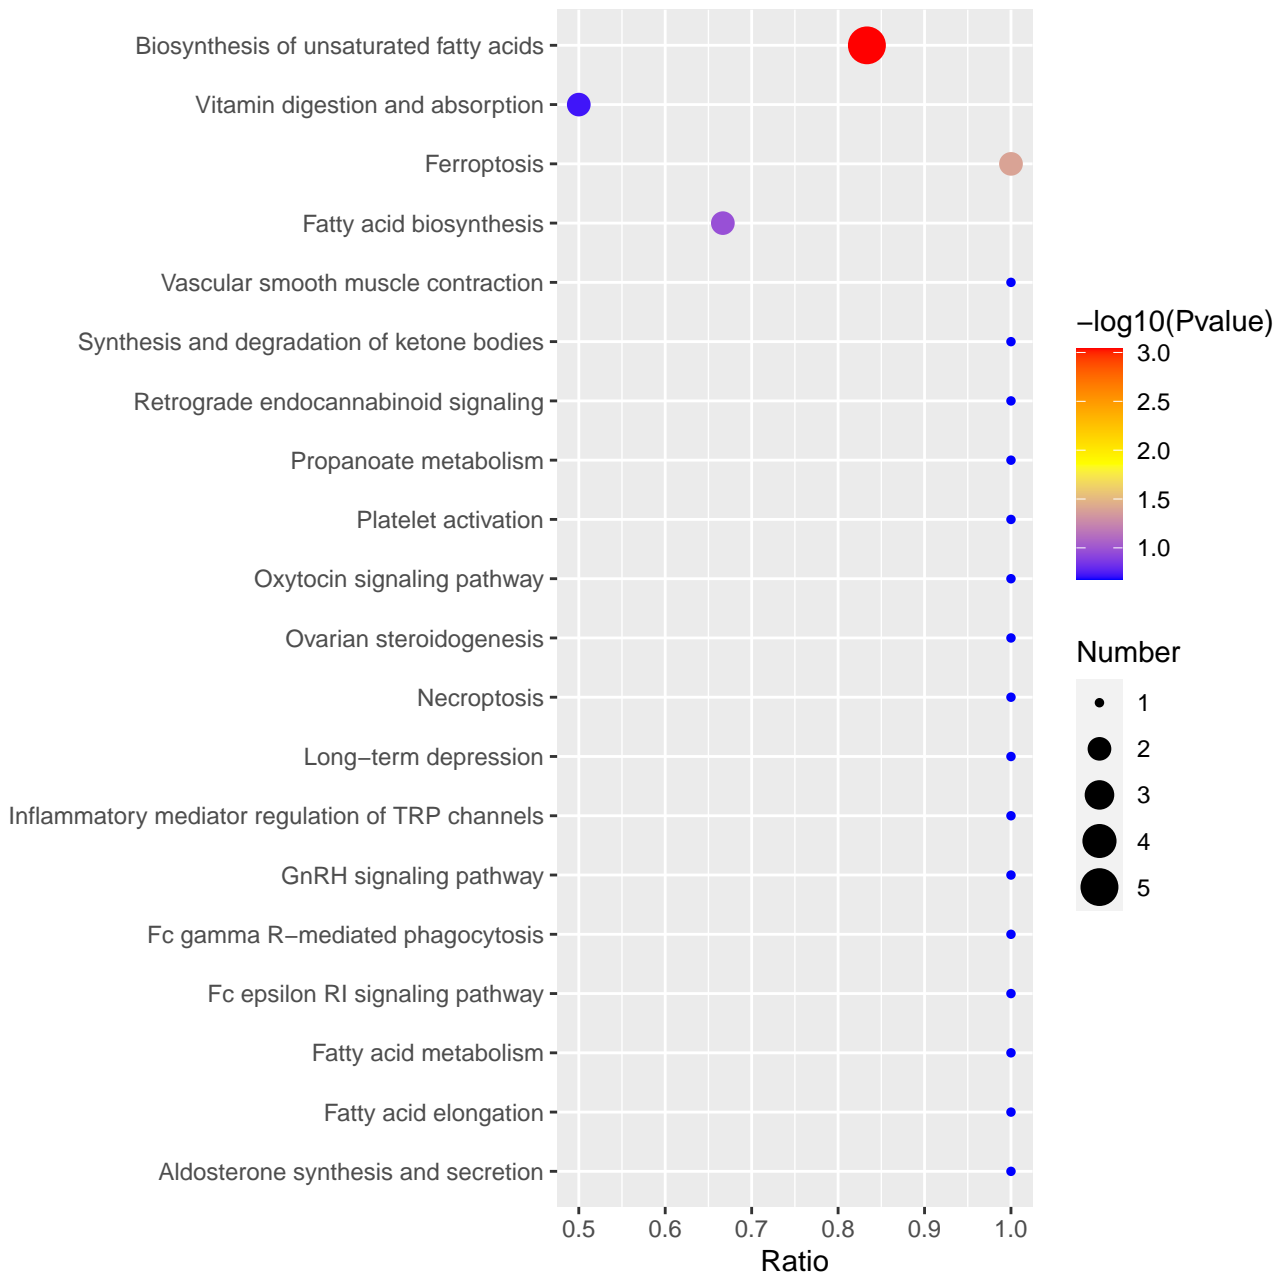

Supplement: RawDataResult.zip [file RawDataResult.zip]

H.vs.NH

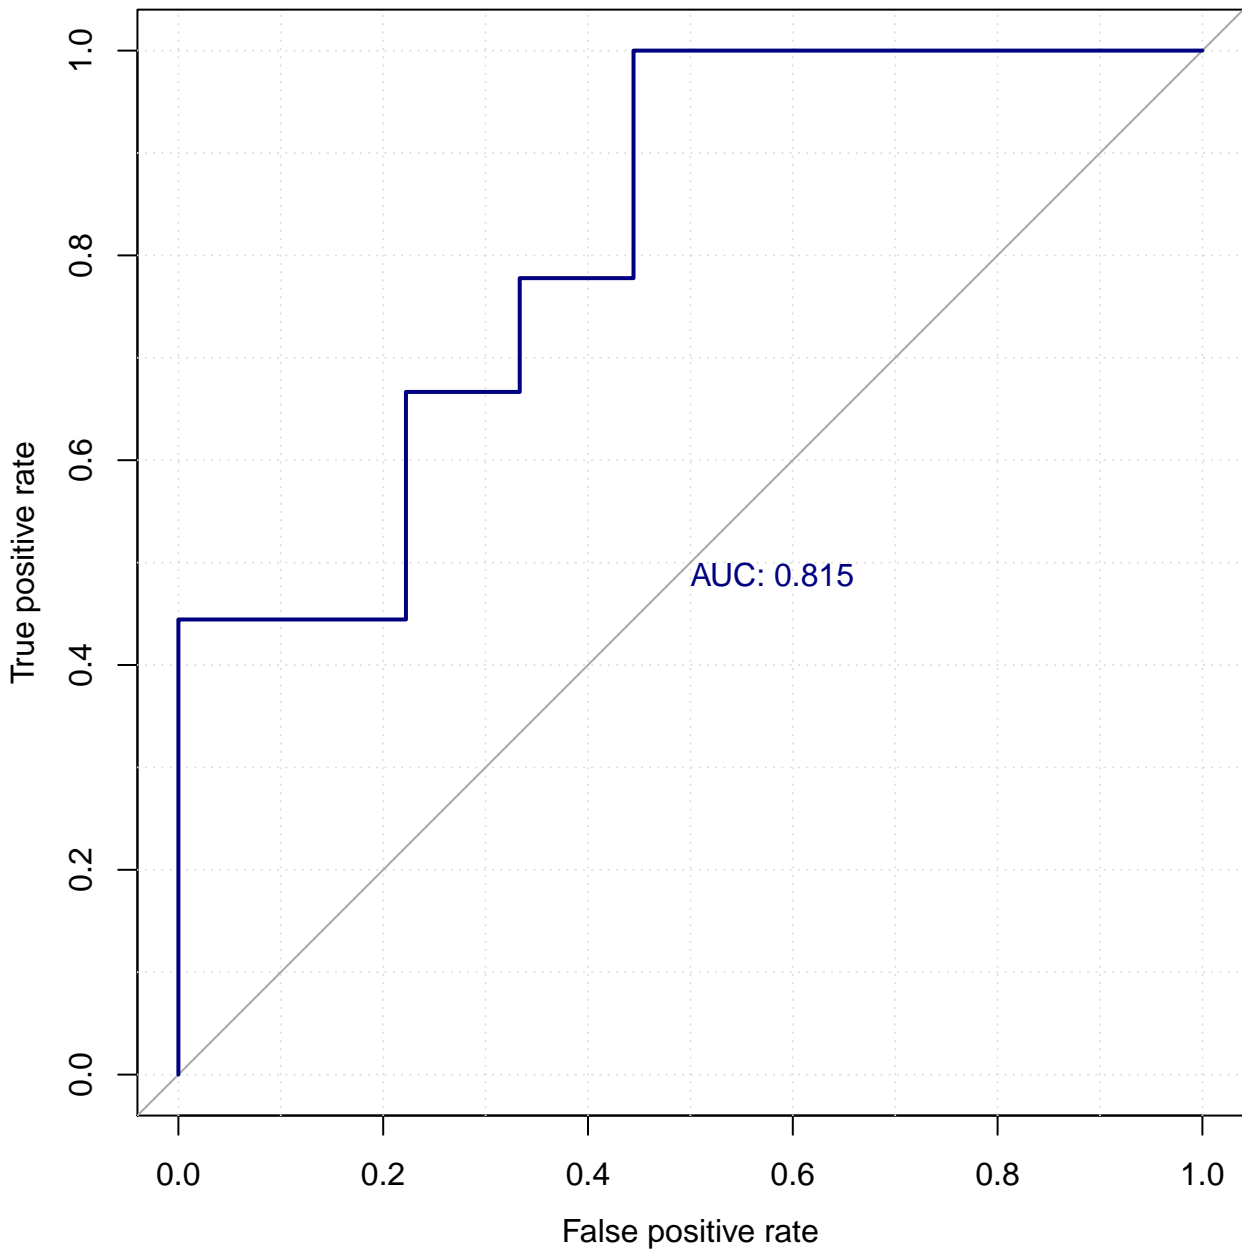

Supplement: RawDataResult.zip [file RawDataResult.zip]

# H.vs.NH

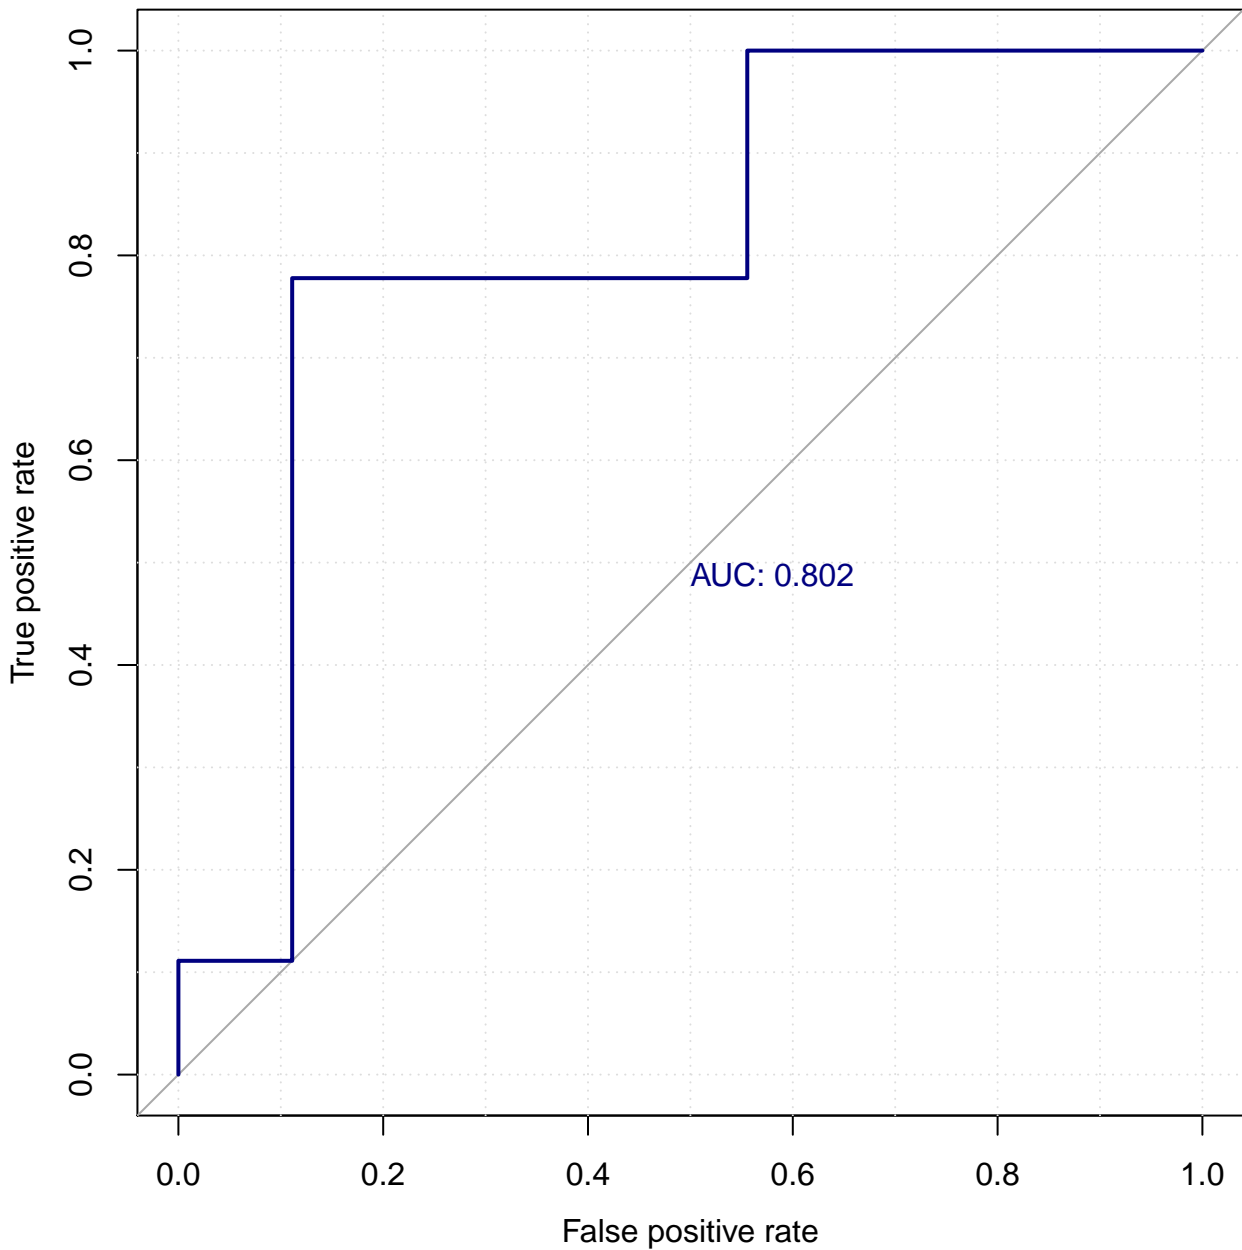

Supplement: RawDataResult.zip [file RawDataResult.zip]

## HMDB annotation

HMDB

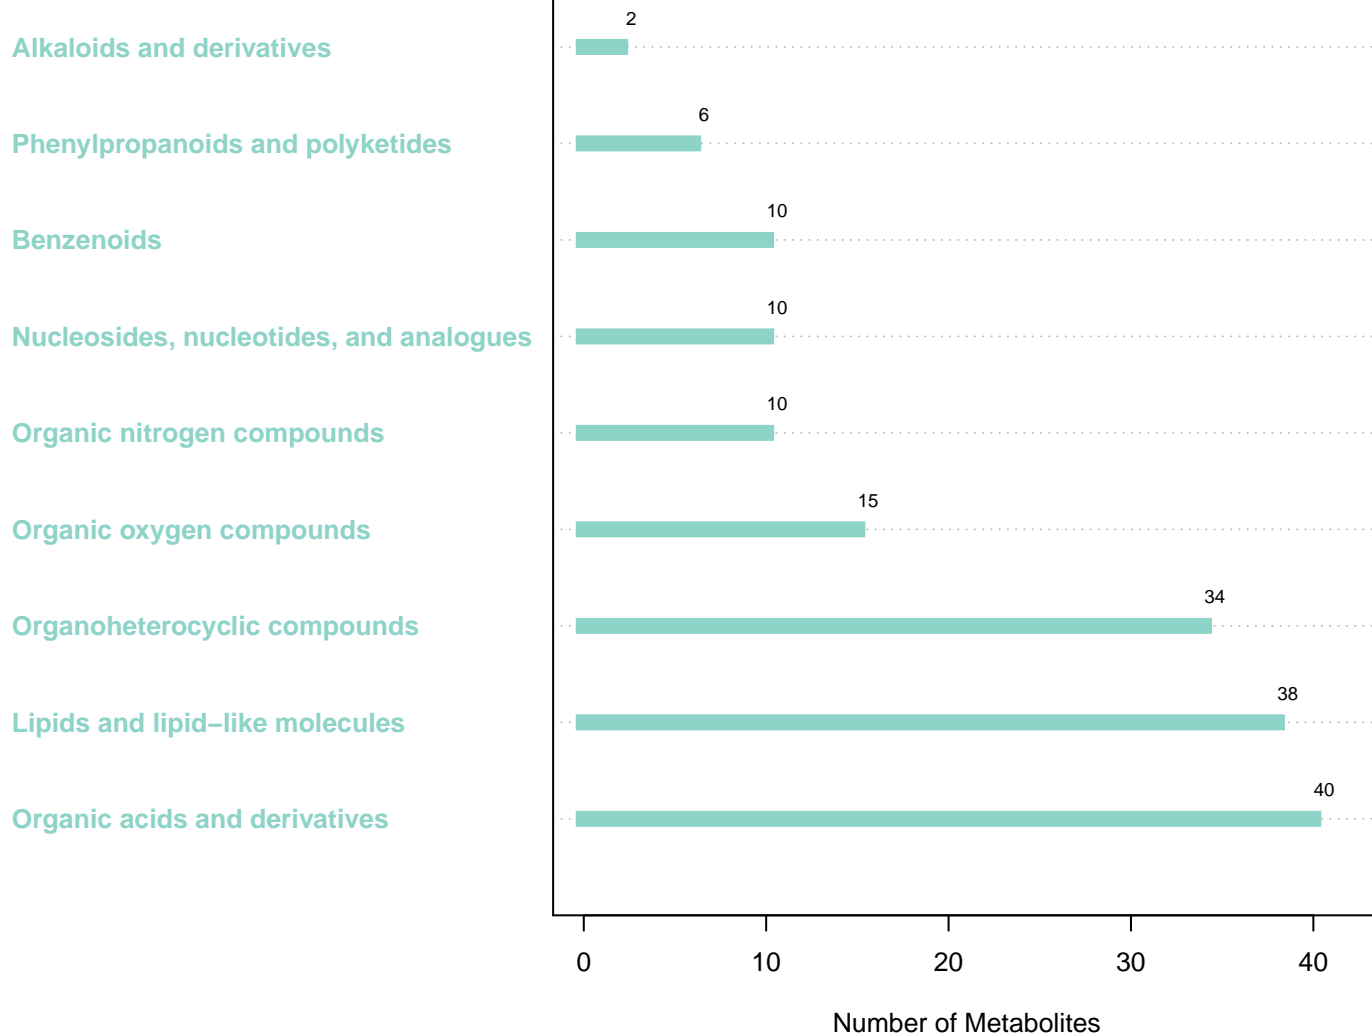

Supplement: RawDataResult.zip [file RawDataResult.zip]

H.vs.NH

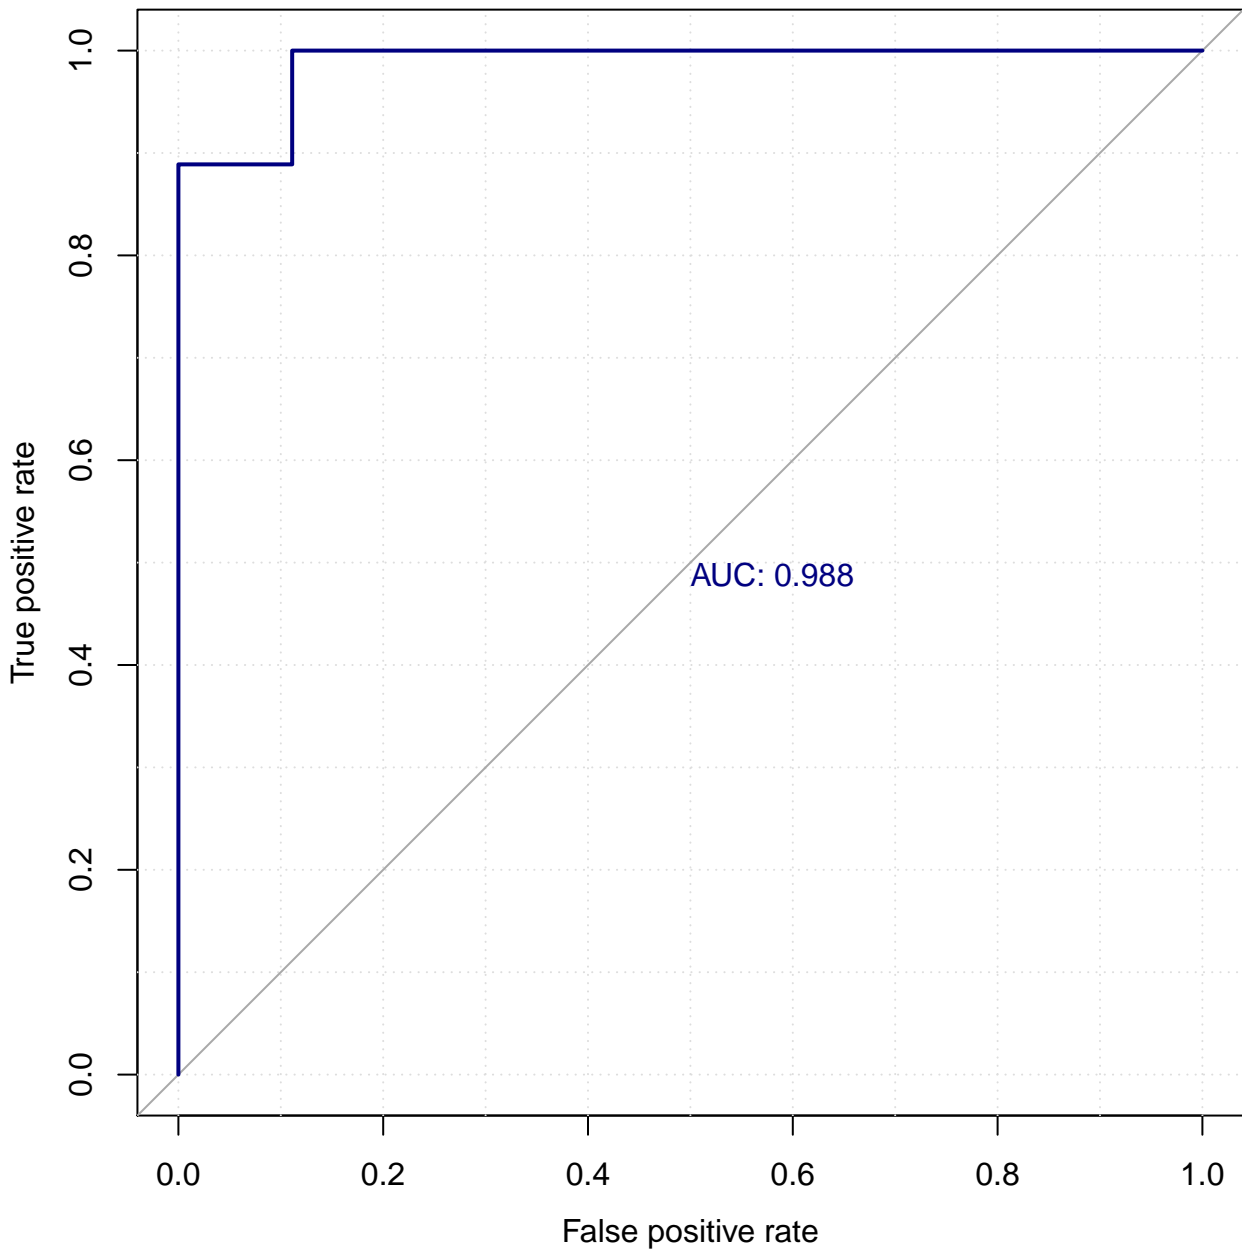

Supplement: RawDataResult.zip [file RawDataResult.zip]

# H.vs.NH

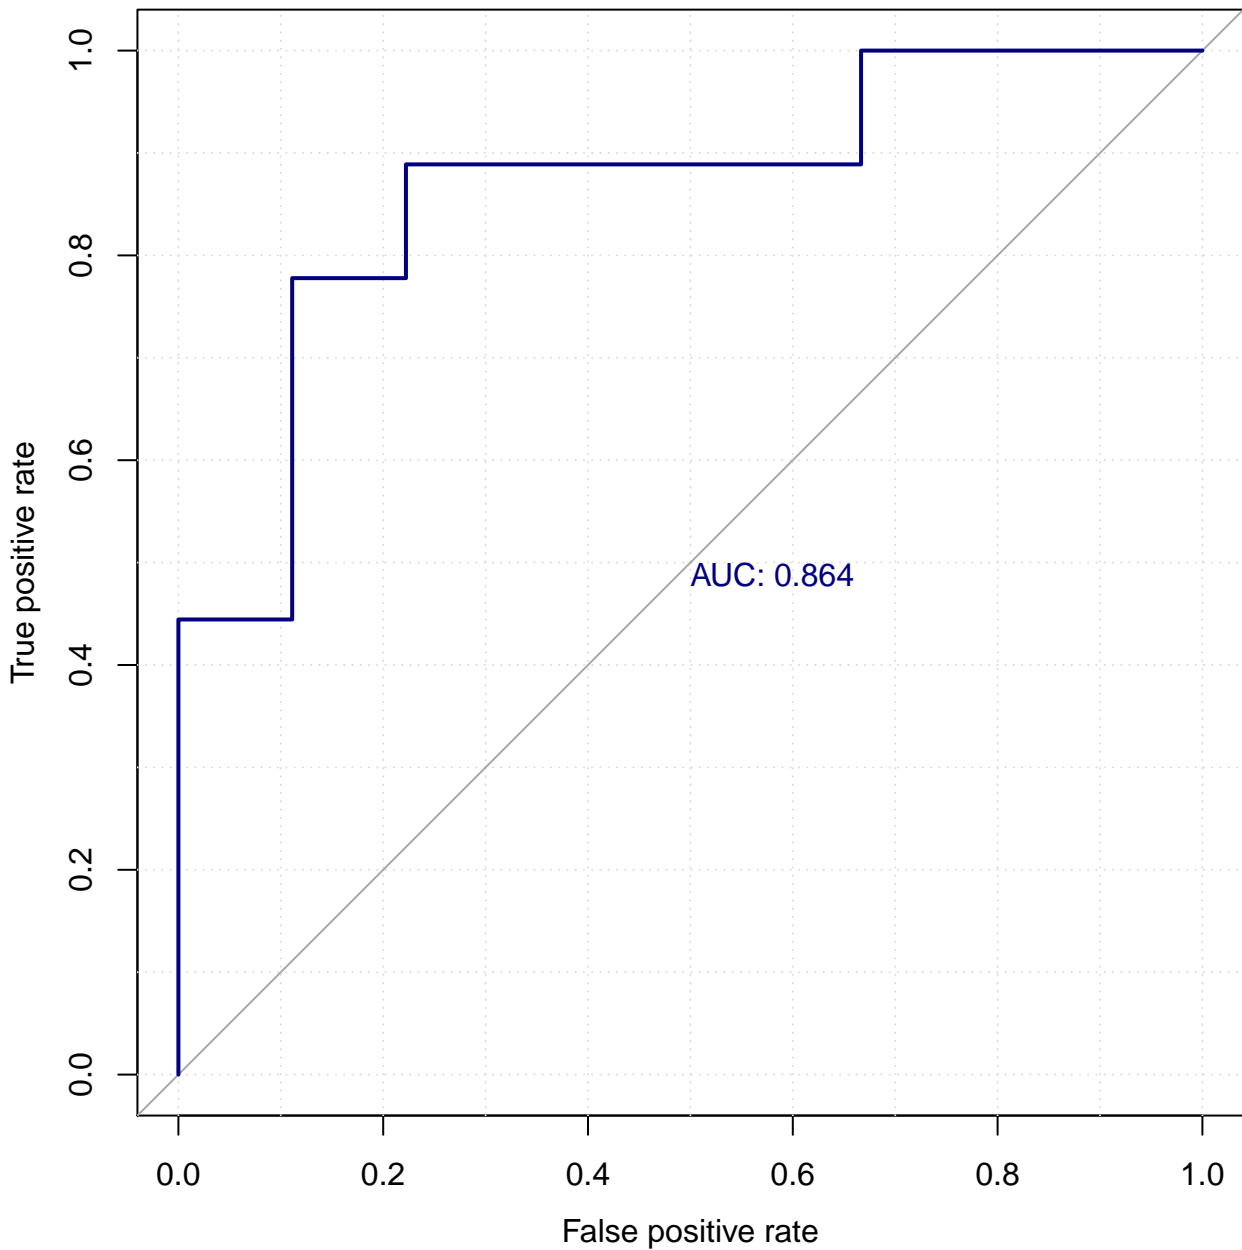

Supplement: RawDataResult.zip [file RawDataResult.zip]

# H.vs.NH



Supplement: RawDataResult.zip [file RawDataResult.zip]

H.vs.NH

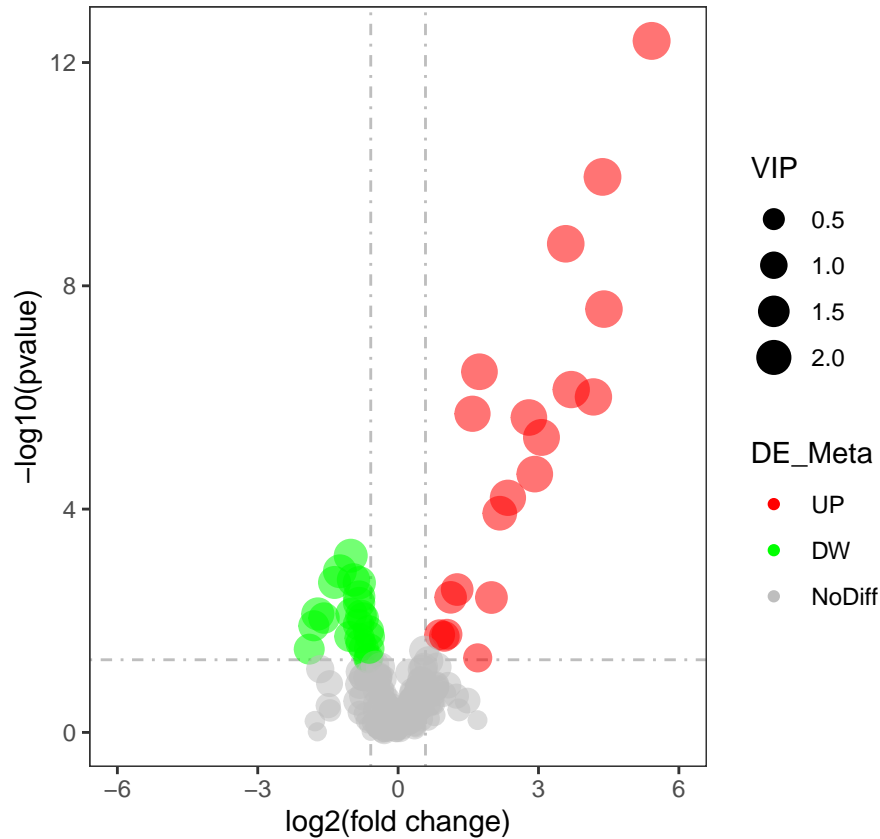

Supplement: RawDataResult.zip [file RawDataResult.zip]

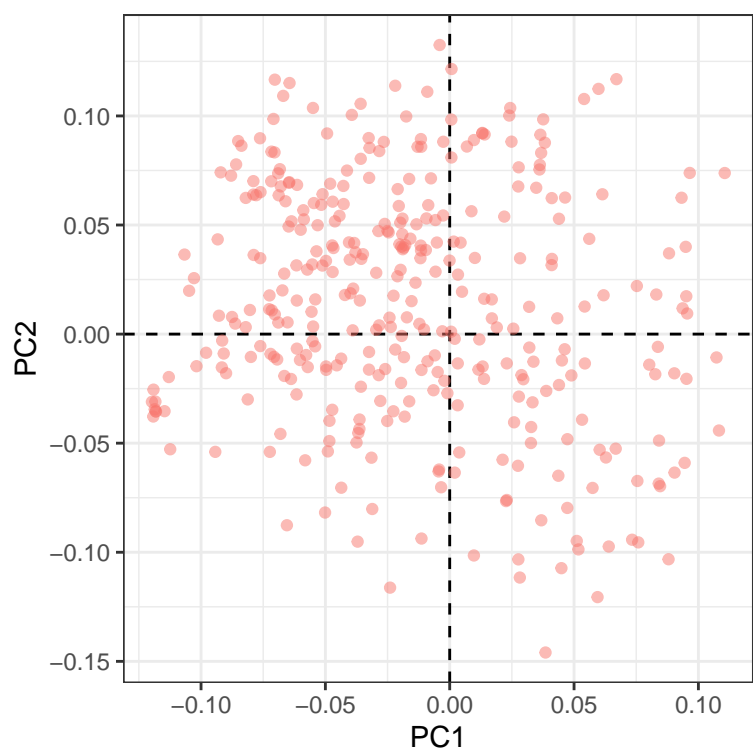

Supplement: RawDataResult.zip [file RawDataResult.zip]

H.vs.NH

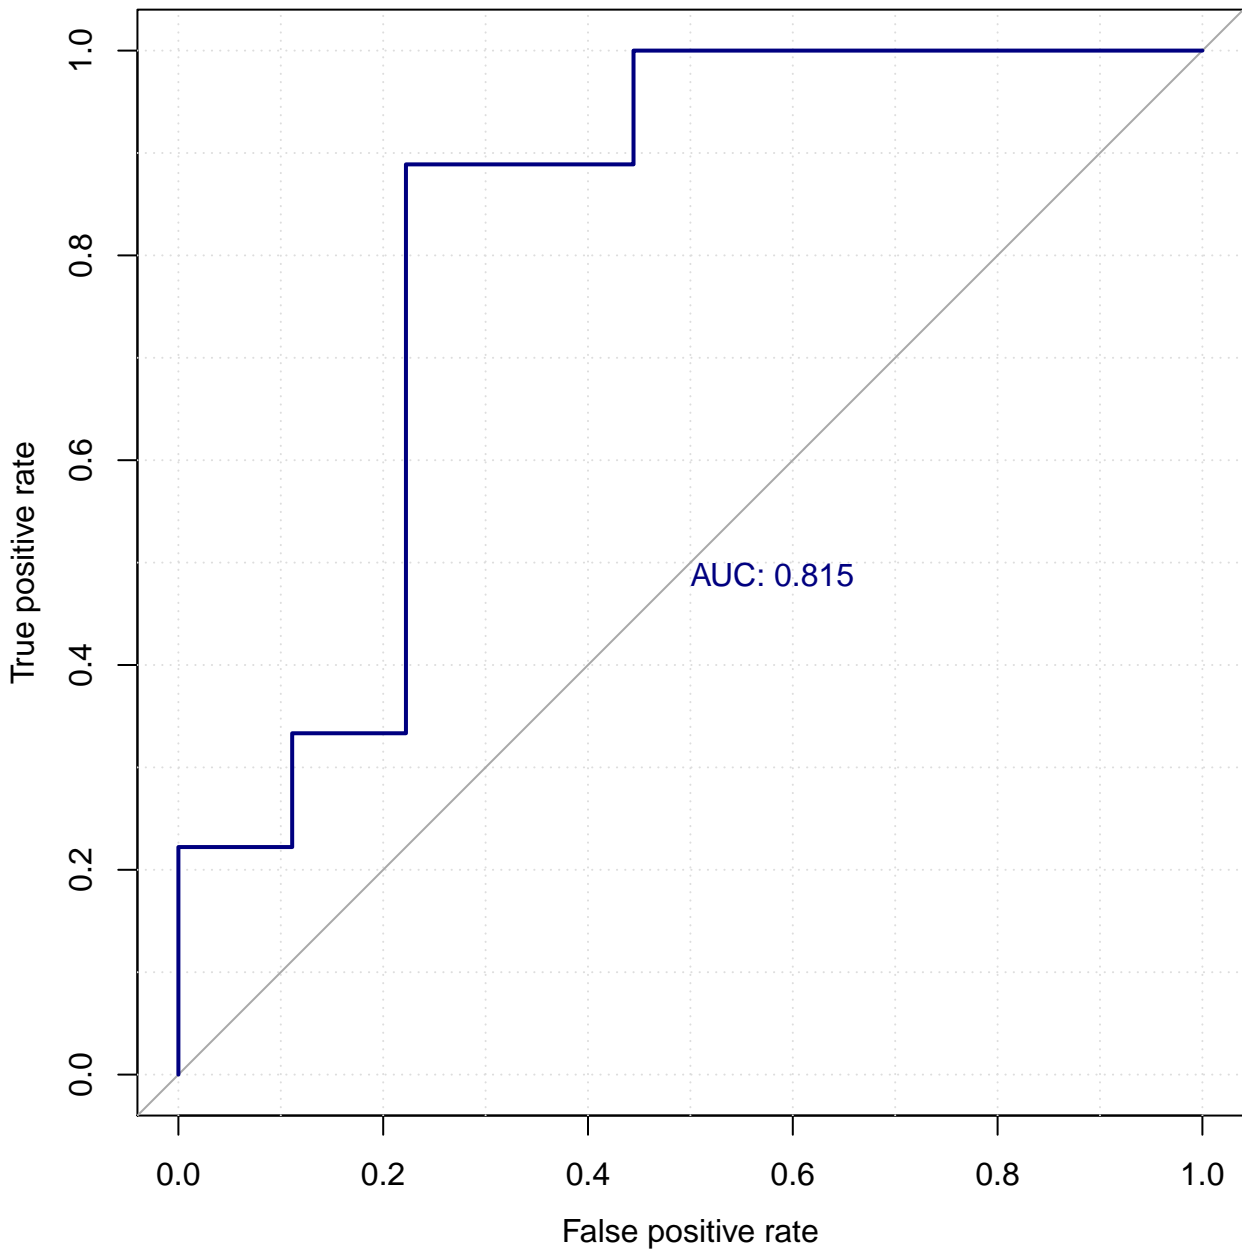

Supplement: RawDataResult.zip [file RawDataResult.zip]

# H.vs.NH

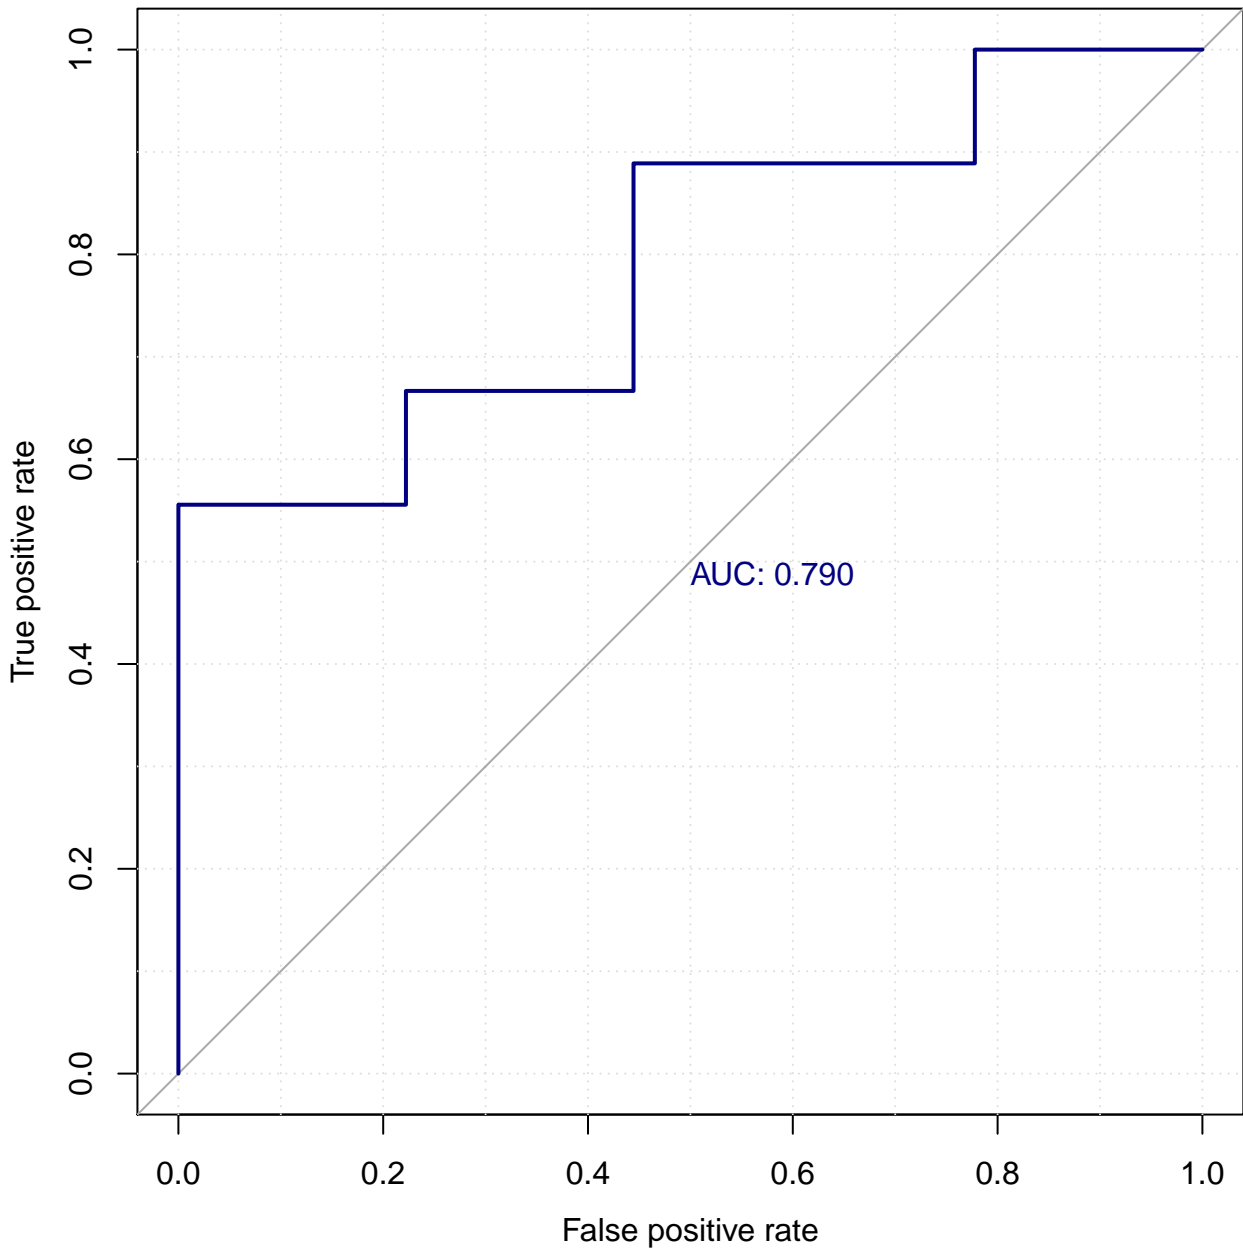

Supplement: RawDataResult.zip [file RawDataResult.zip]

# H.vs.NH

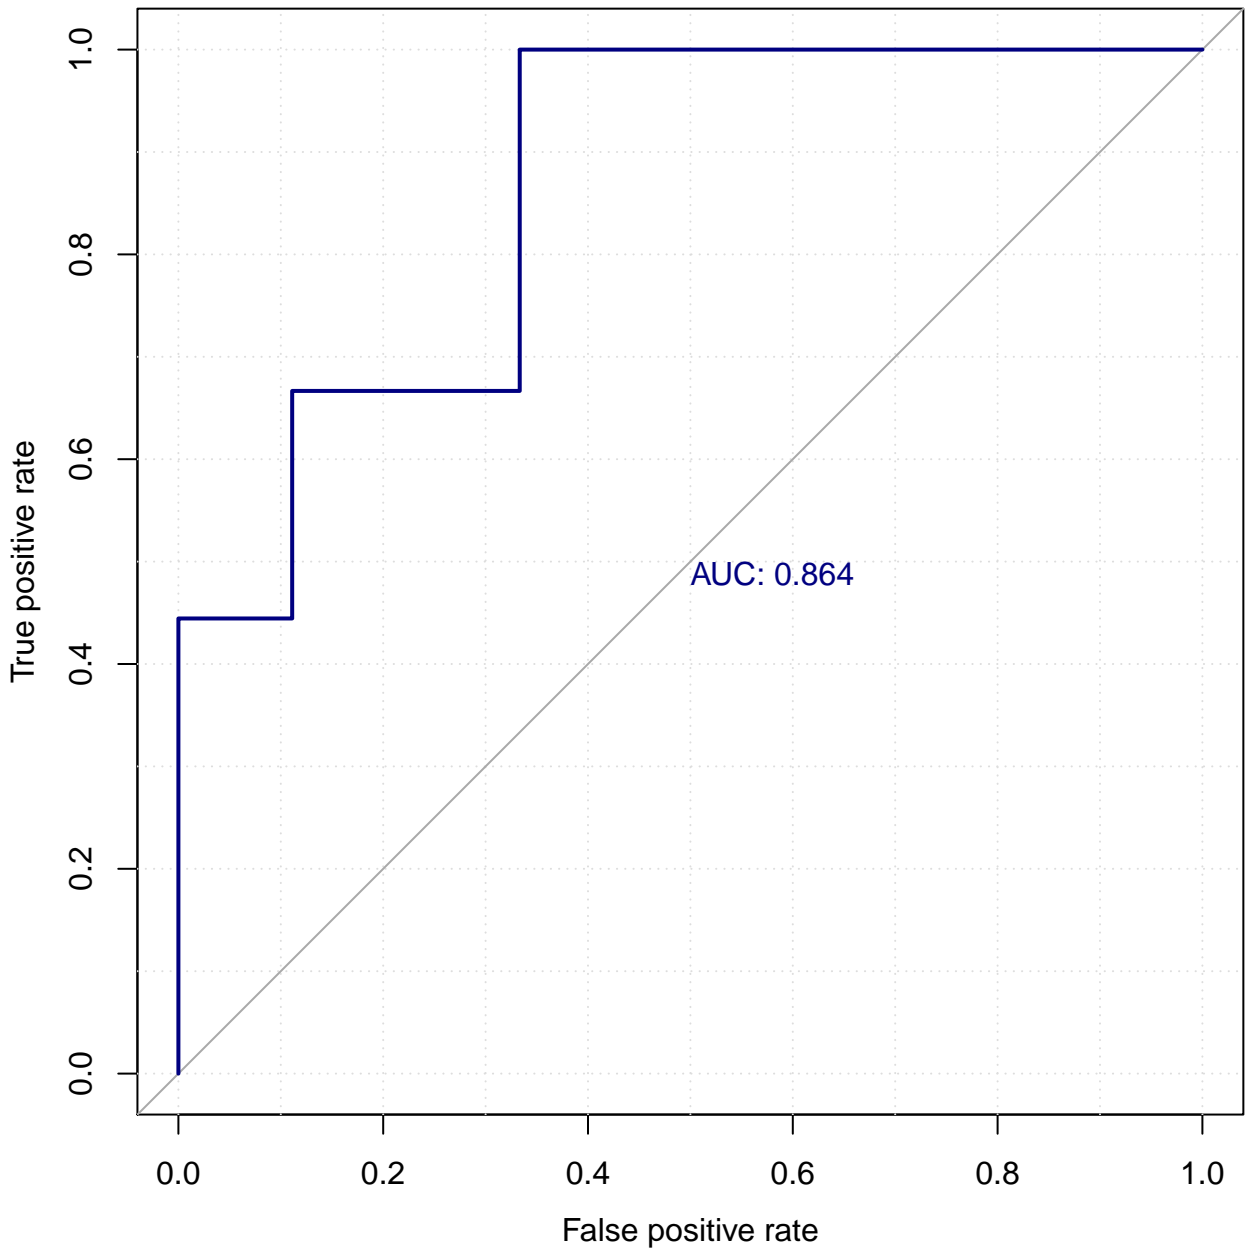

Supplement: RawDataResult.zip [file RawDataResult.zip]

H.vs.NH

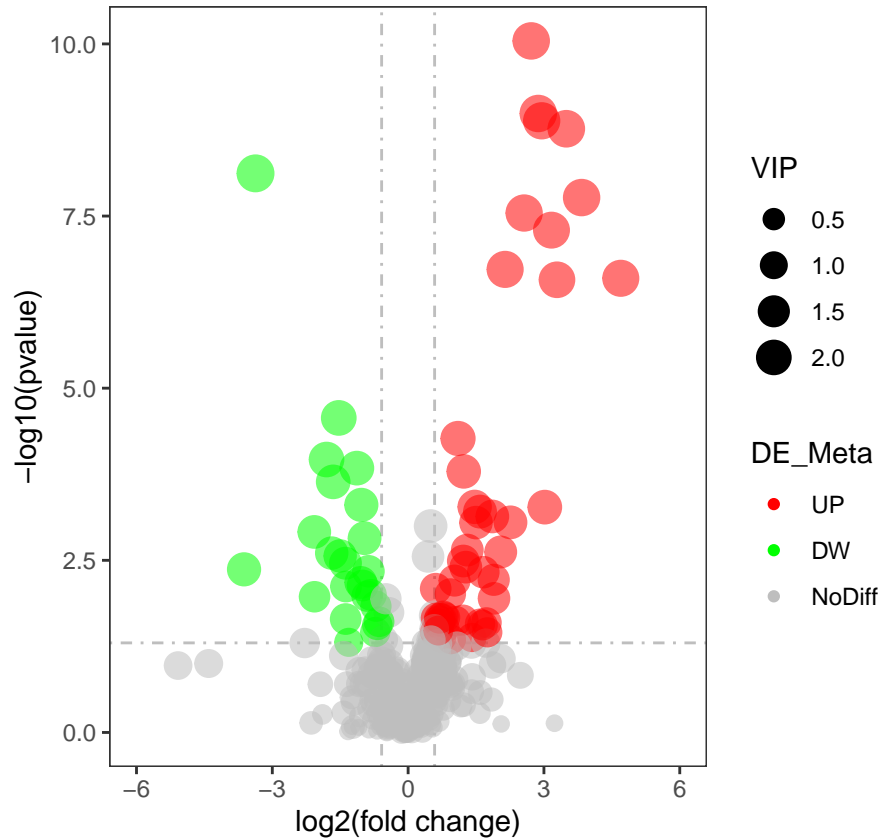

Supplement: RawDataResult.zip [file RawDataResult.zip]

# H.vs.NH

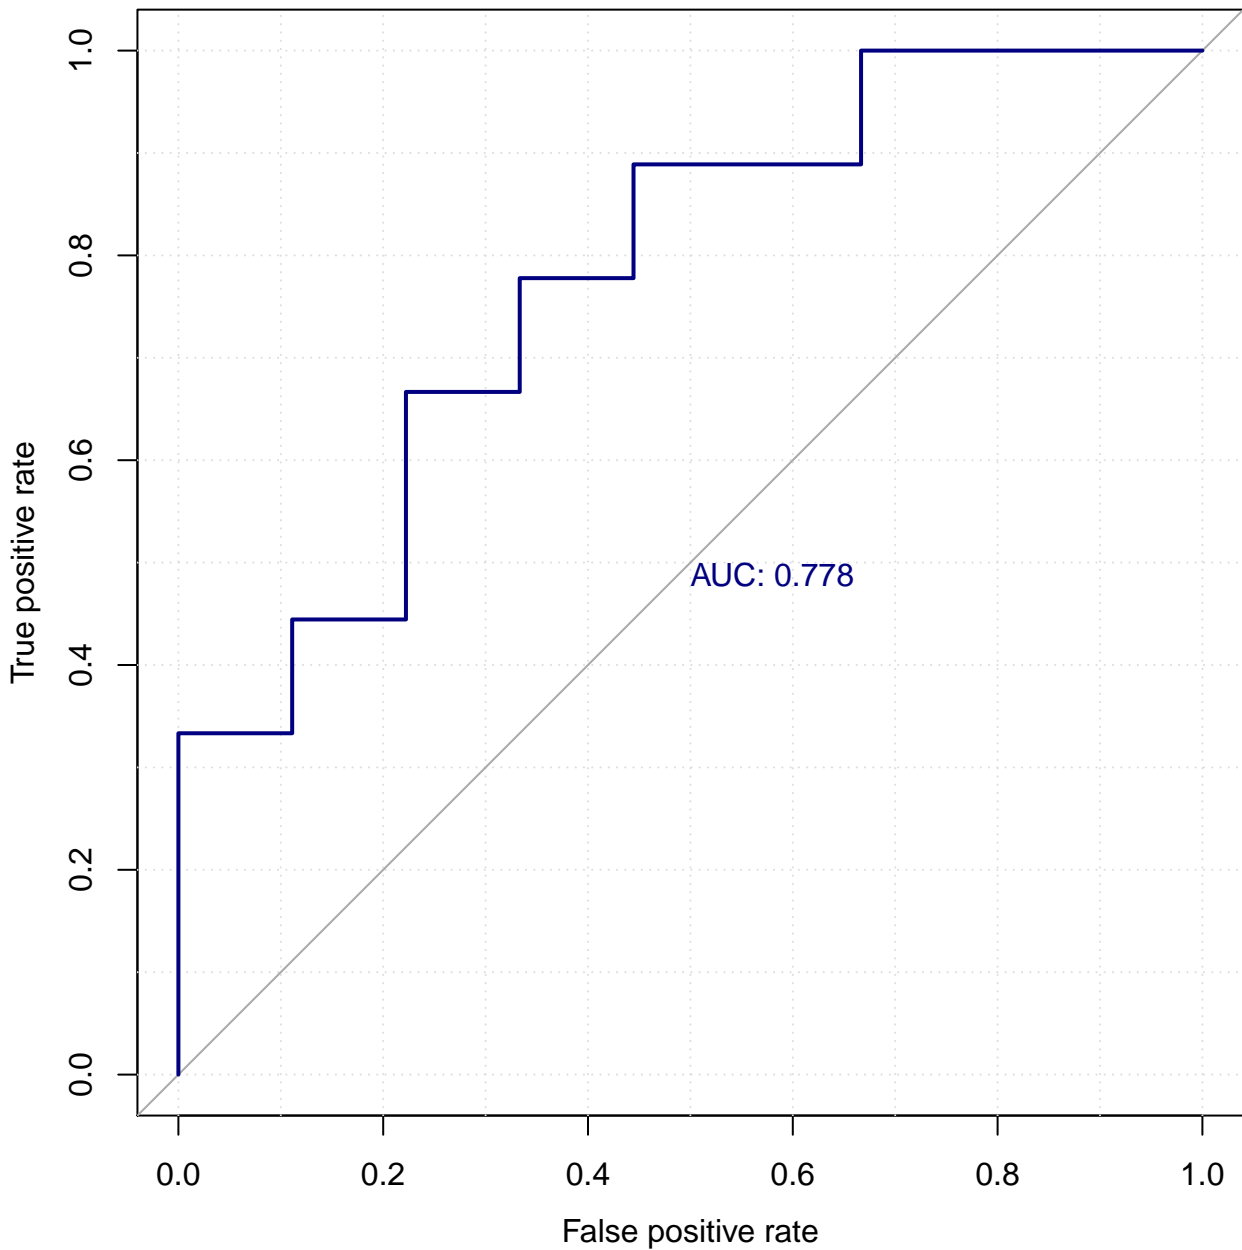

Supplement: RawDataResult.zip [file RawDataResult.zip]

# H.vs.NH



Supplement: RawDataResult.zip [file RawDataResult.zip]

H.vs.NH

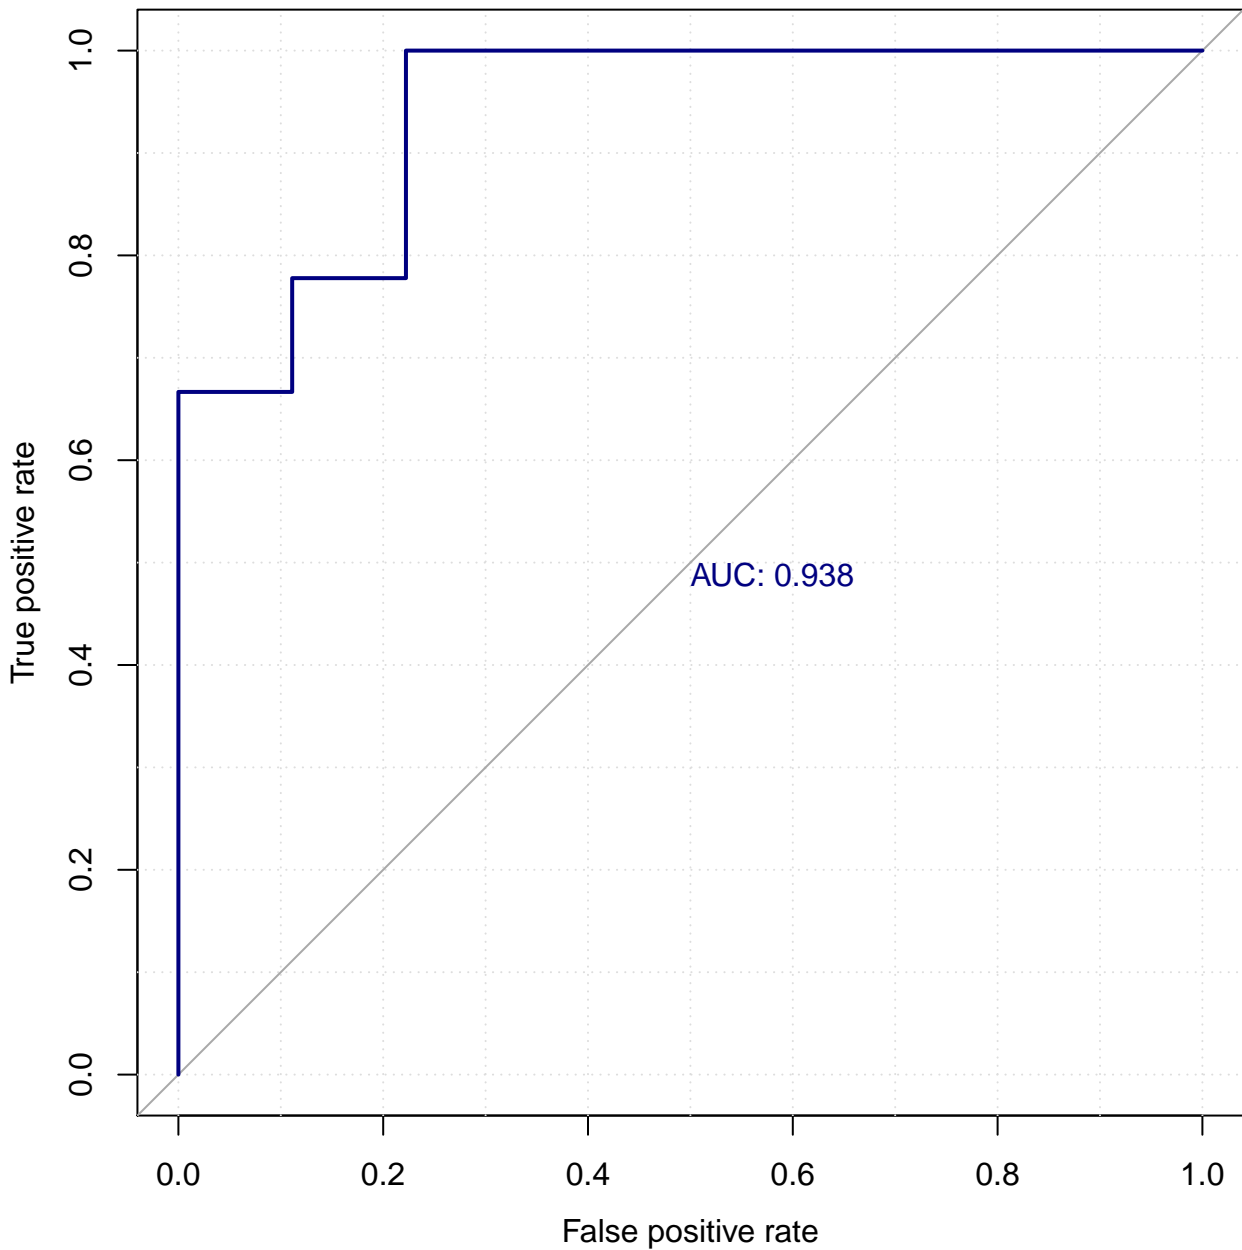

Supplement: RawDataResult.zip [file RawDataResult.zip]

H.vs.NH

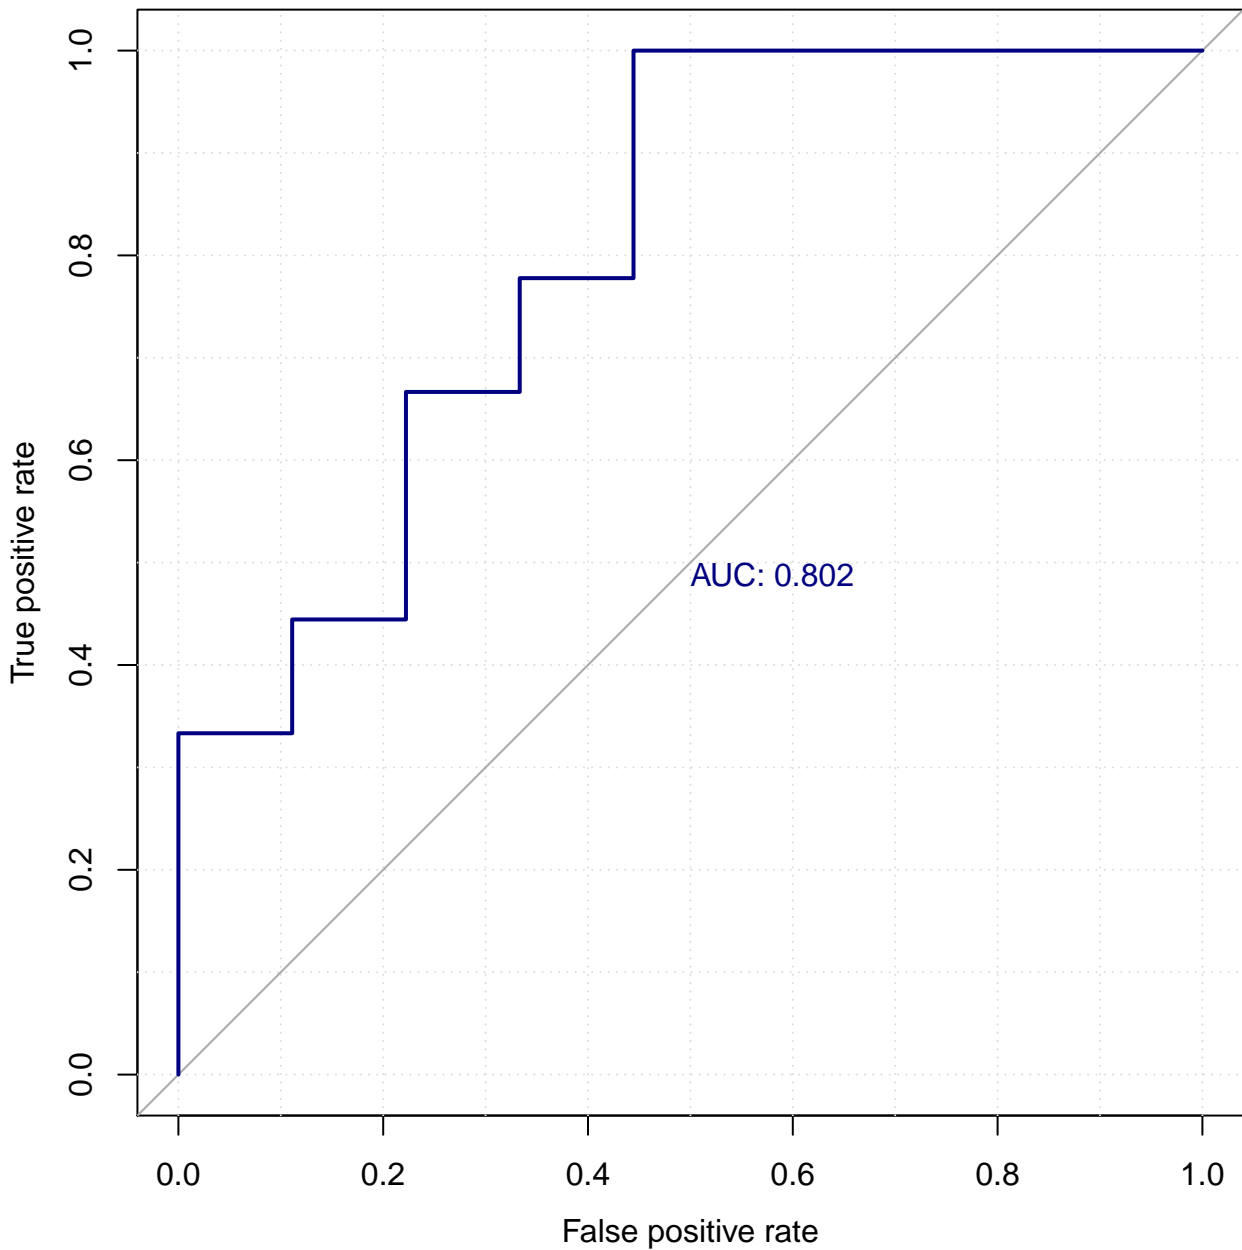

Supplement: RawDataResult.zip [file RawDataResult.zip]

H.vs.NH

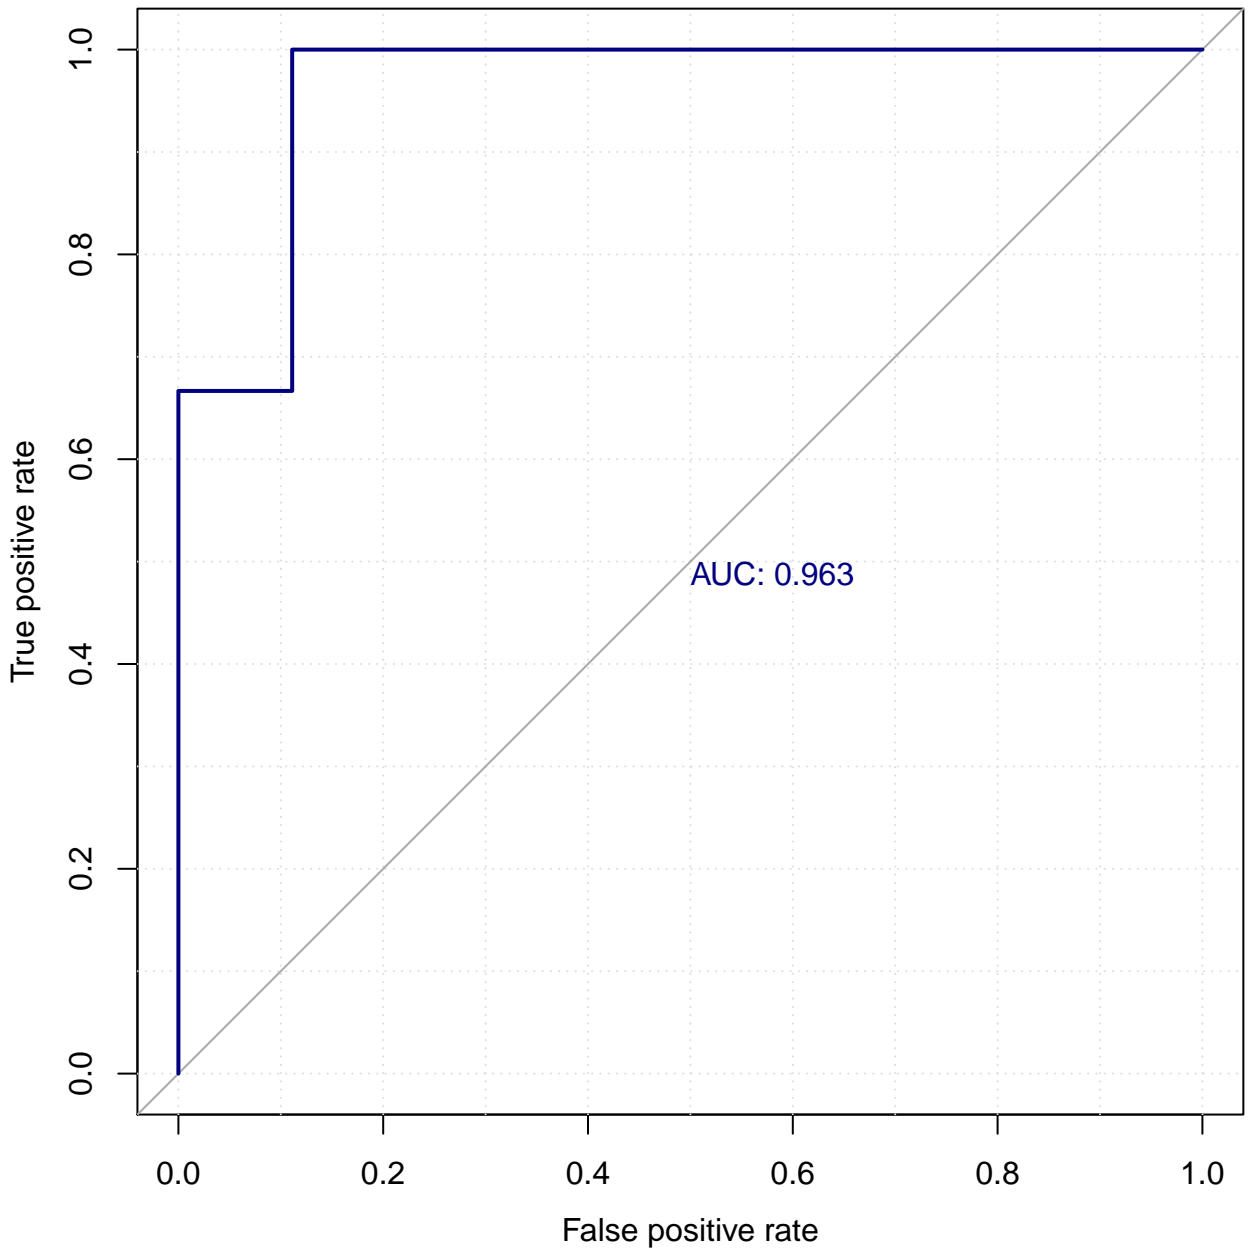

Supplement: RawDataResult.zip [file RawDataResult.zip]

H.vs.NH

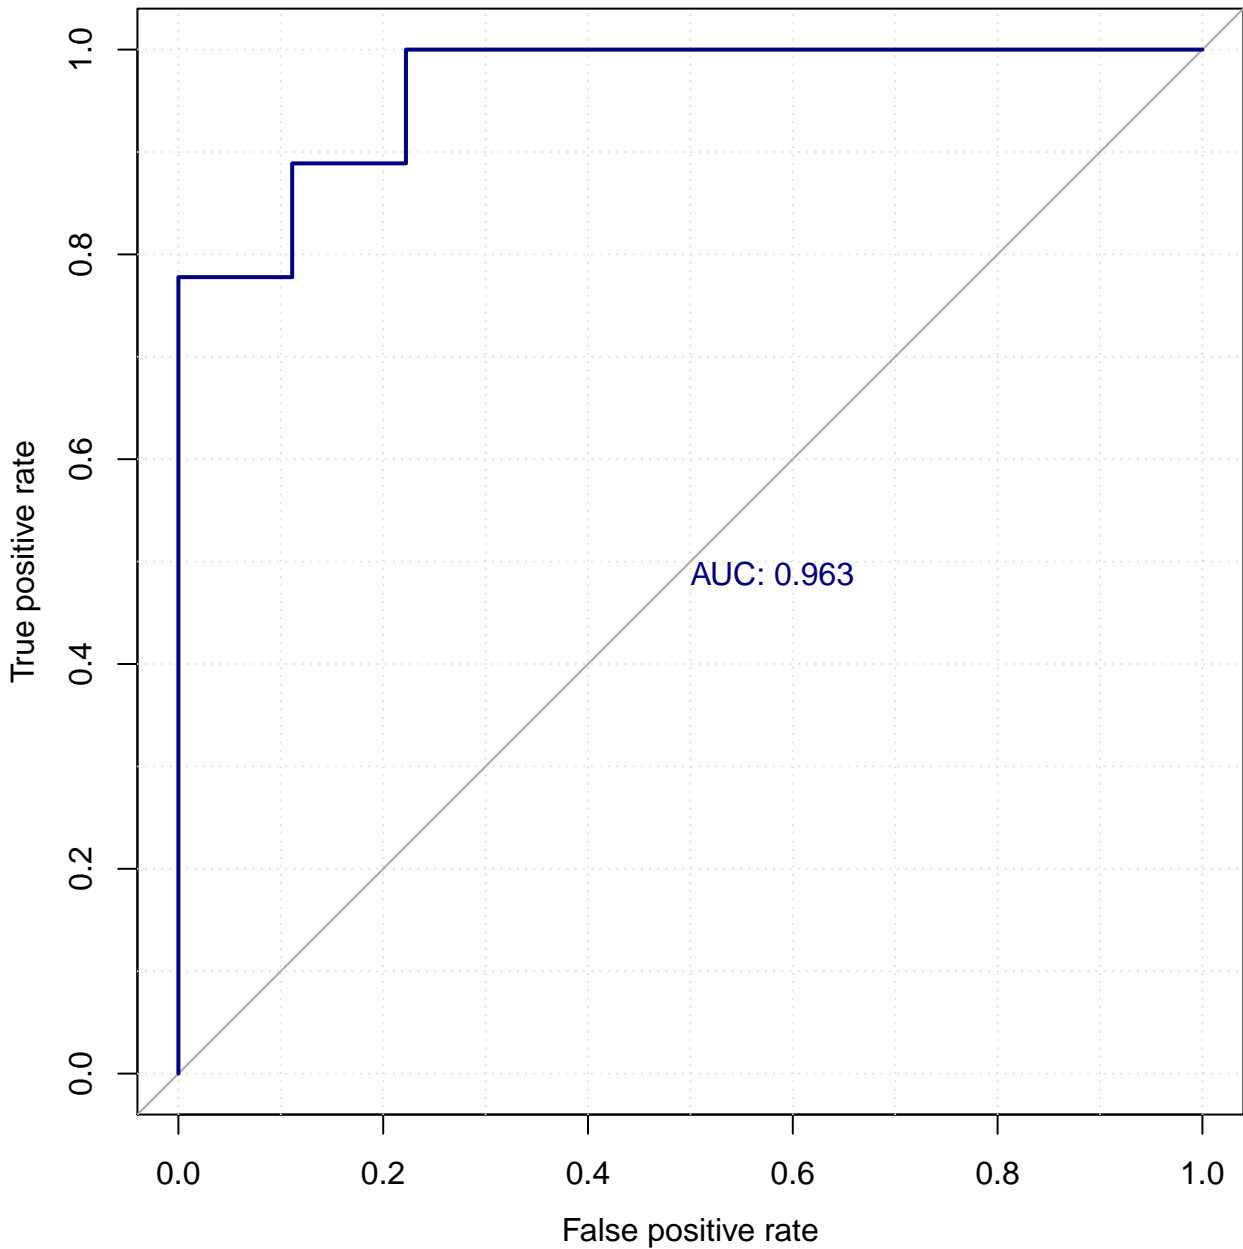

Supplement: RawDataResult.zip [file RawDataResult.zip]

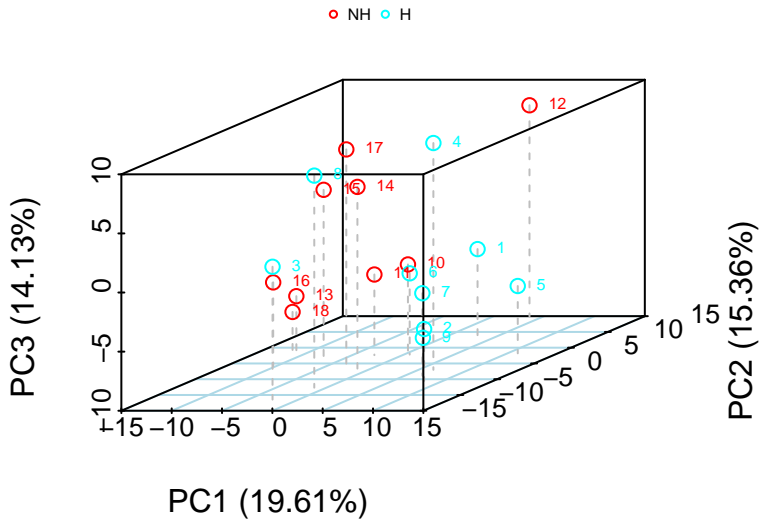

Supplement: RawDataResult.zip [file RawDataResult.zip]

H.vs.NH

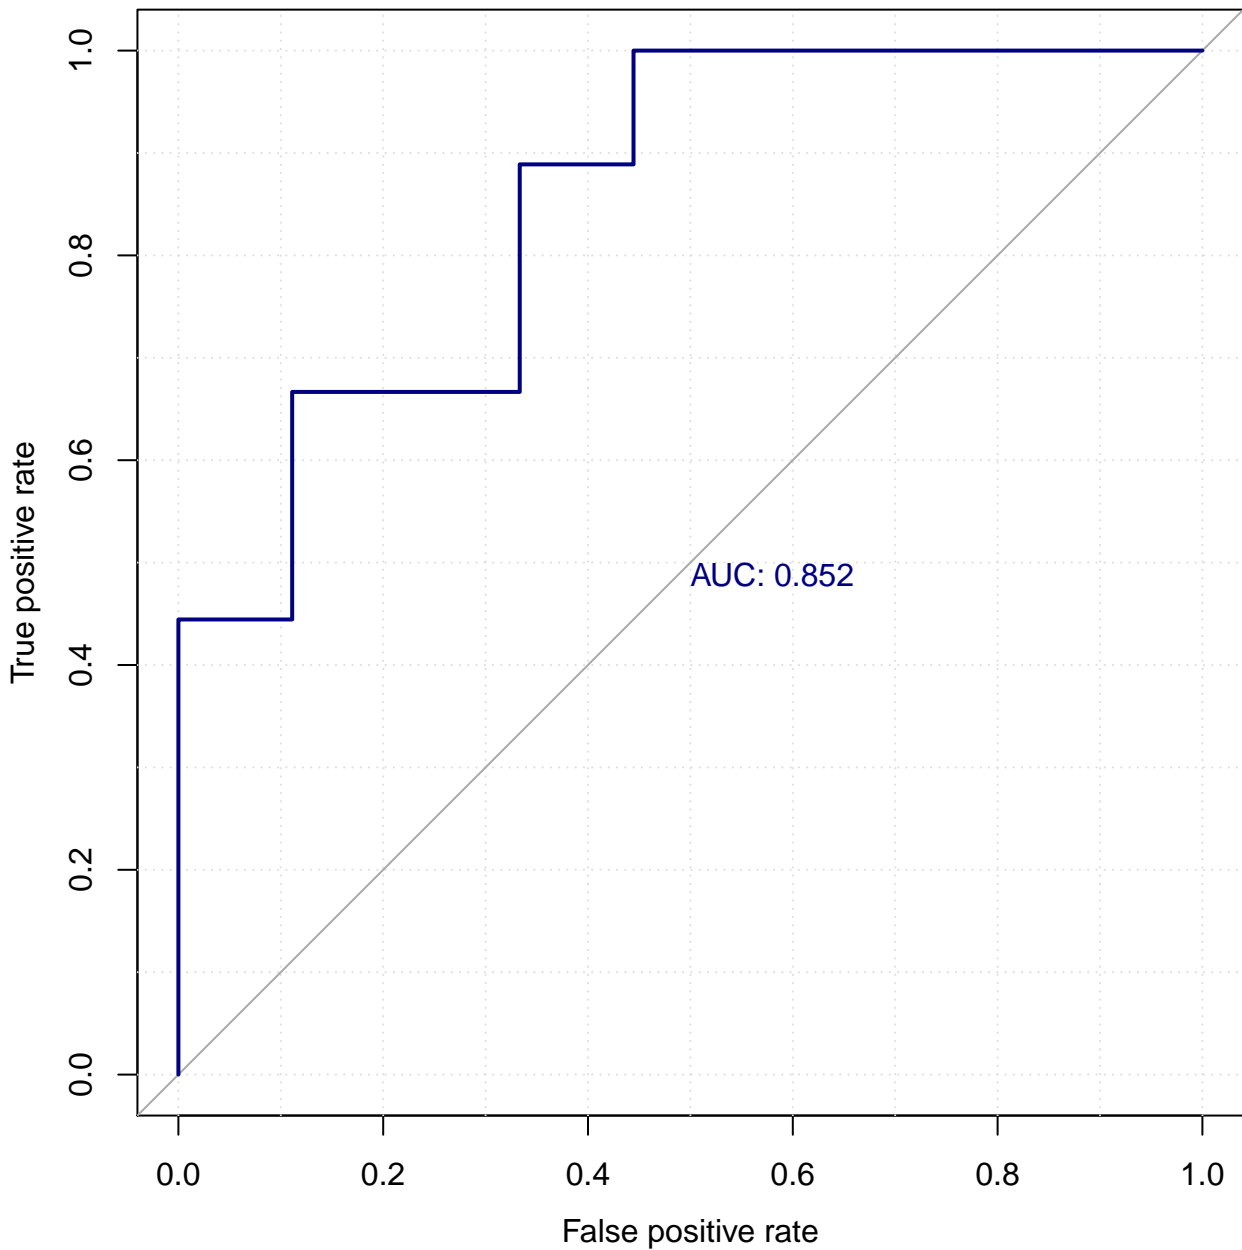

Supplement: RawDataResult.zip [file RawDataResult.zip]

# H.vs.NH

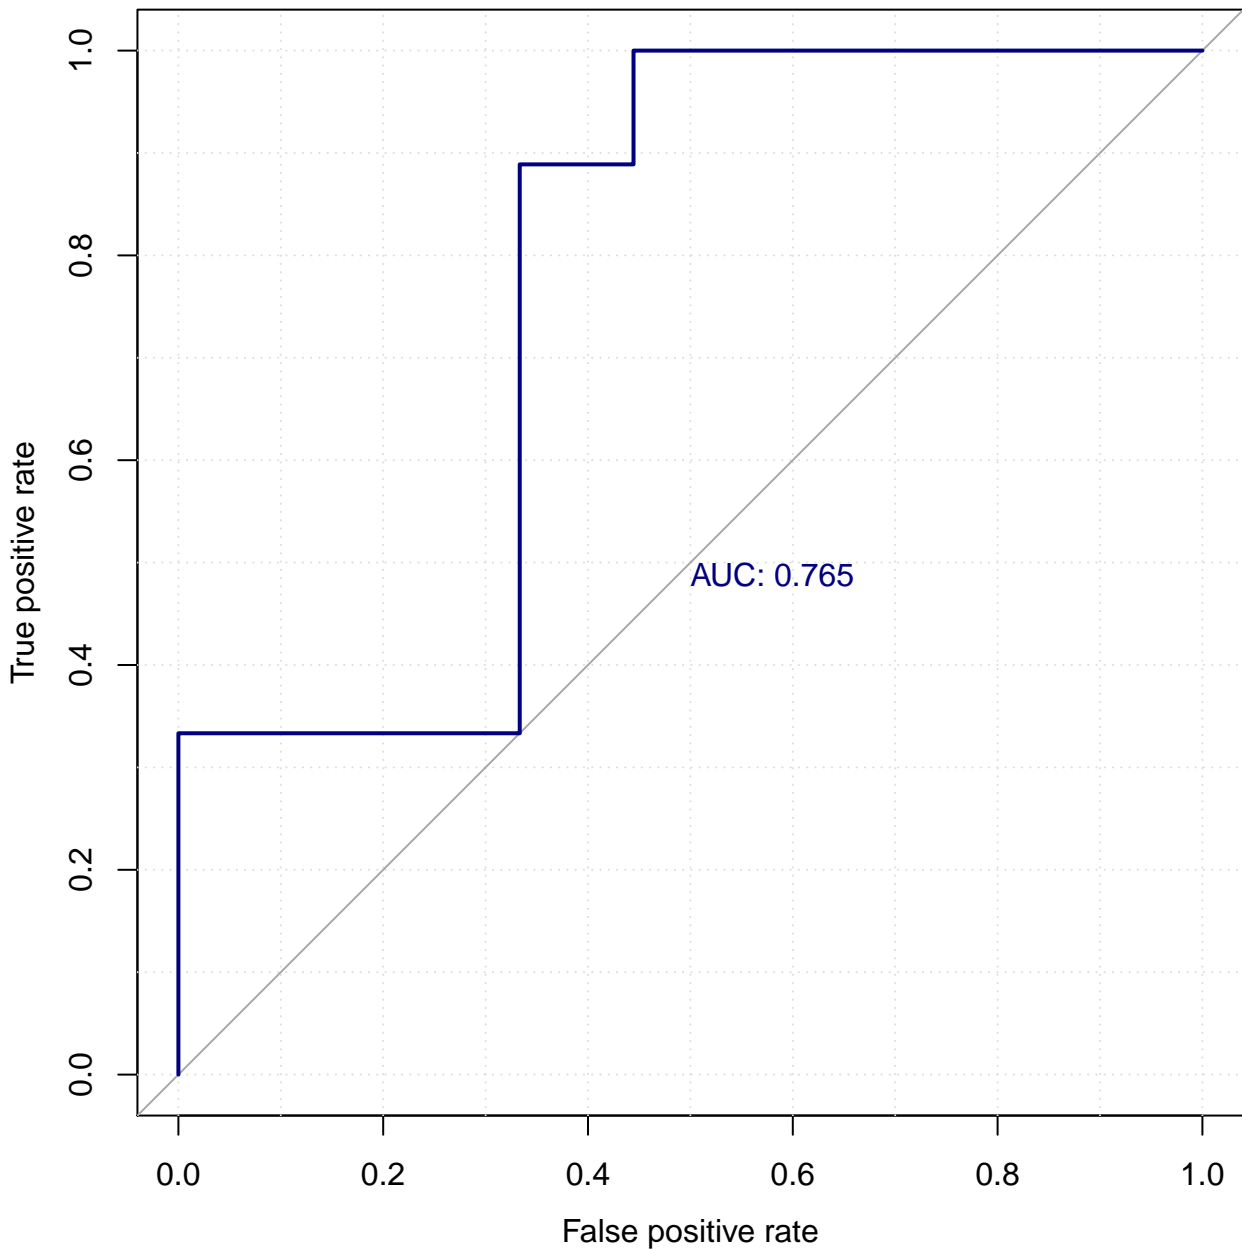

Supplement: RawDataResult.zip [file RawDataResult.zip]

# H.vs.NH

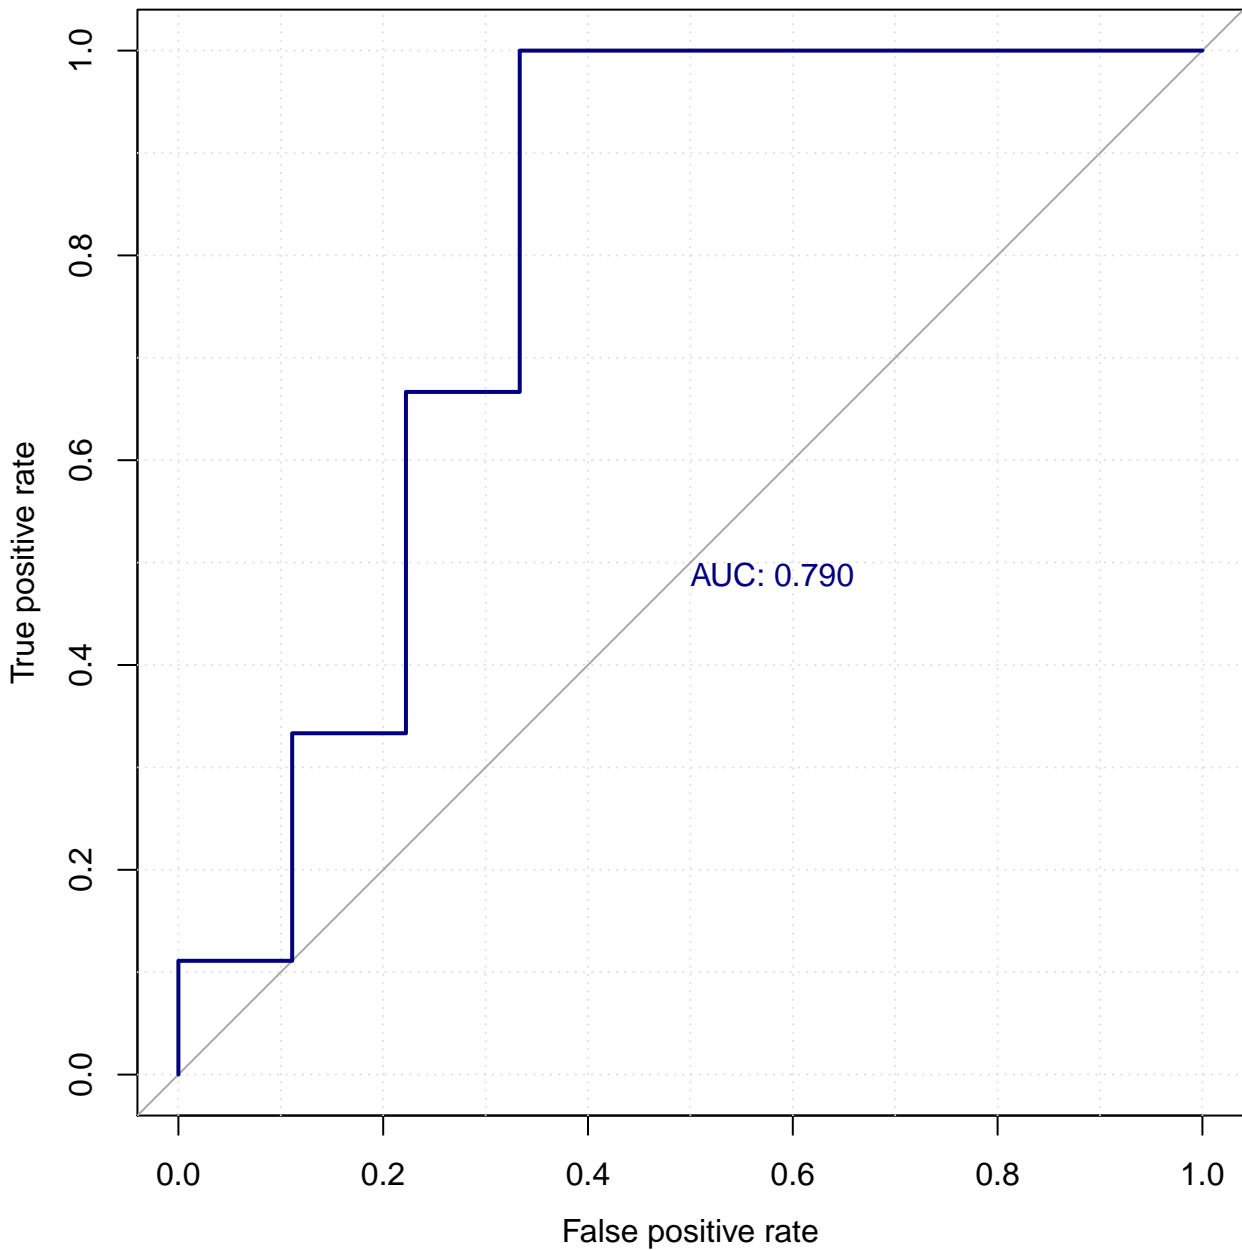

Supplement: RawDataResult.zip [file RawDataResult.zip]

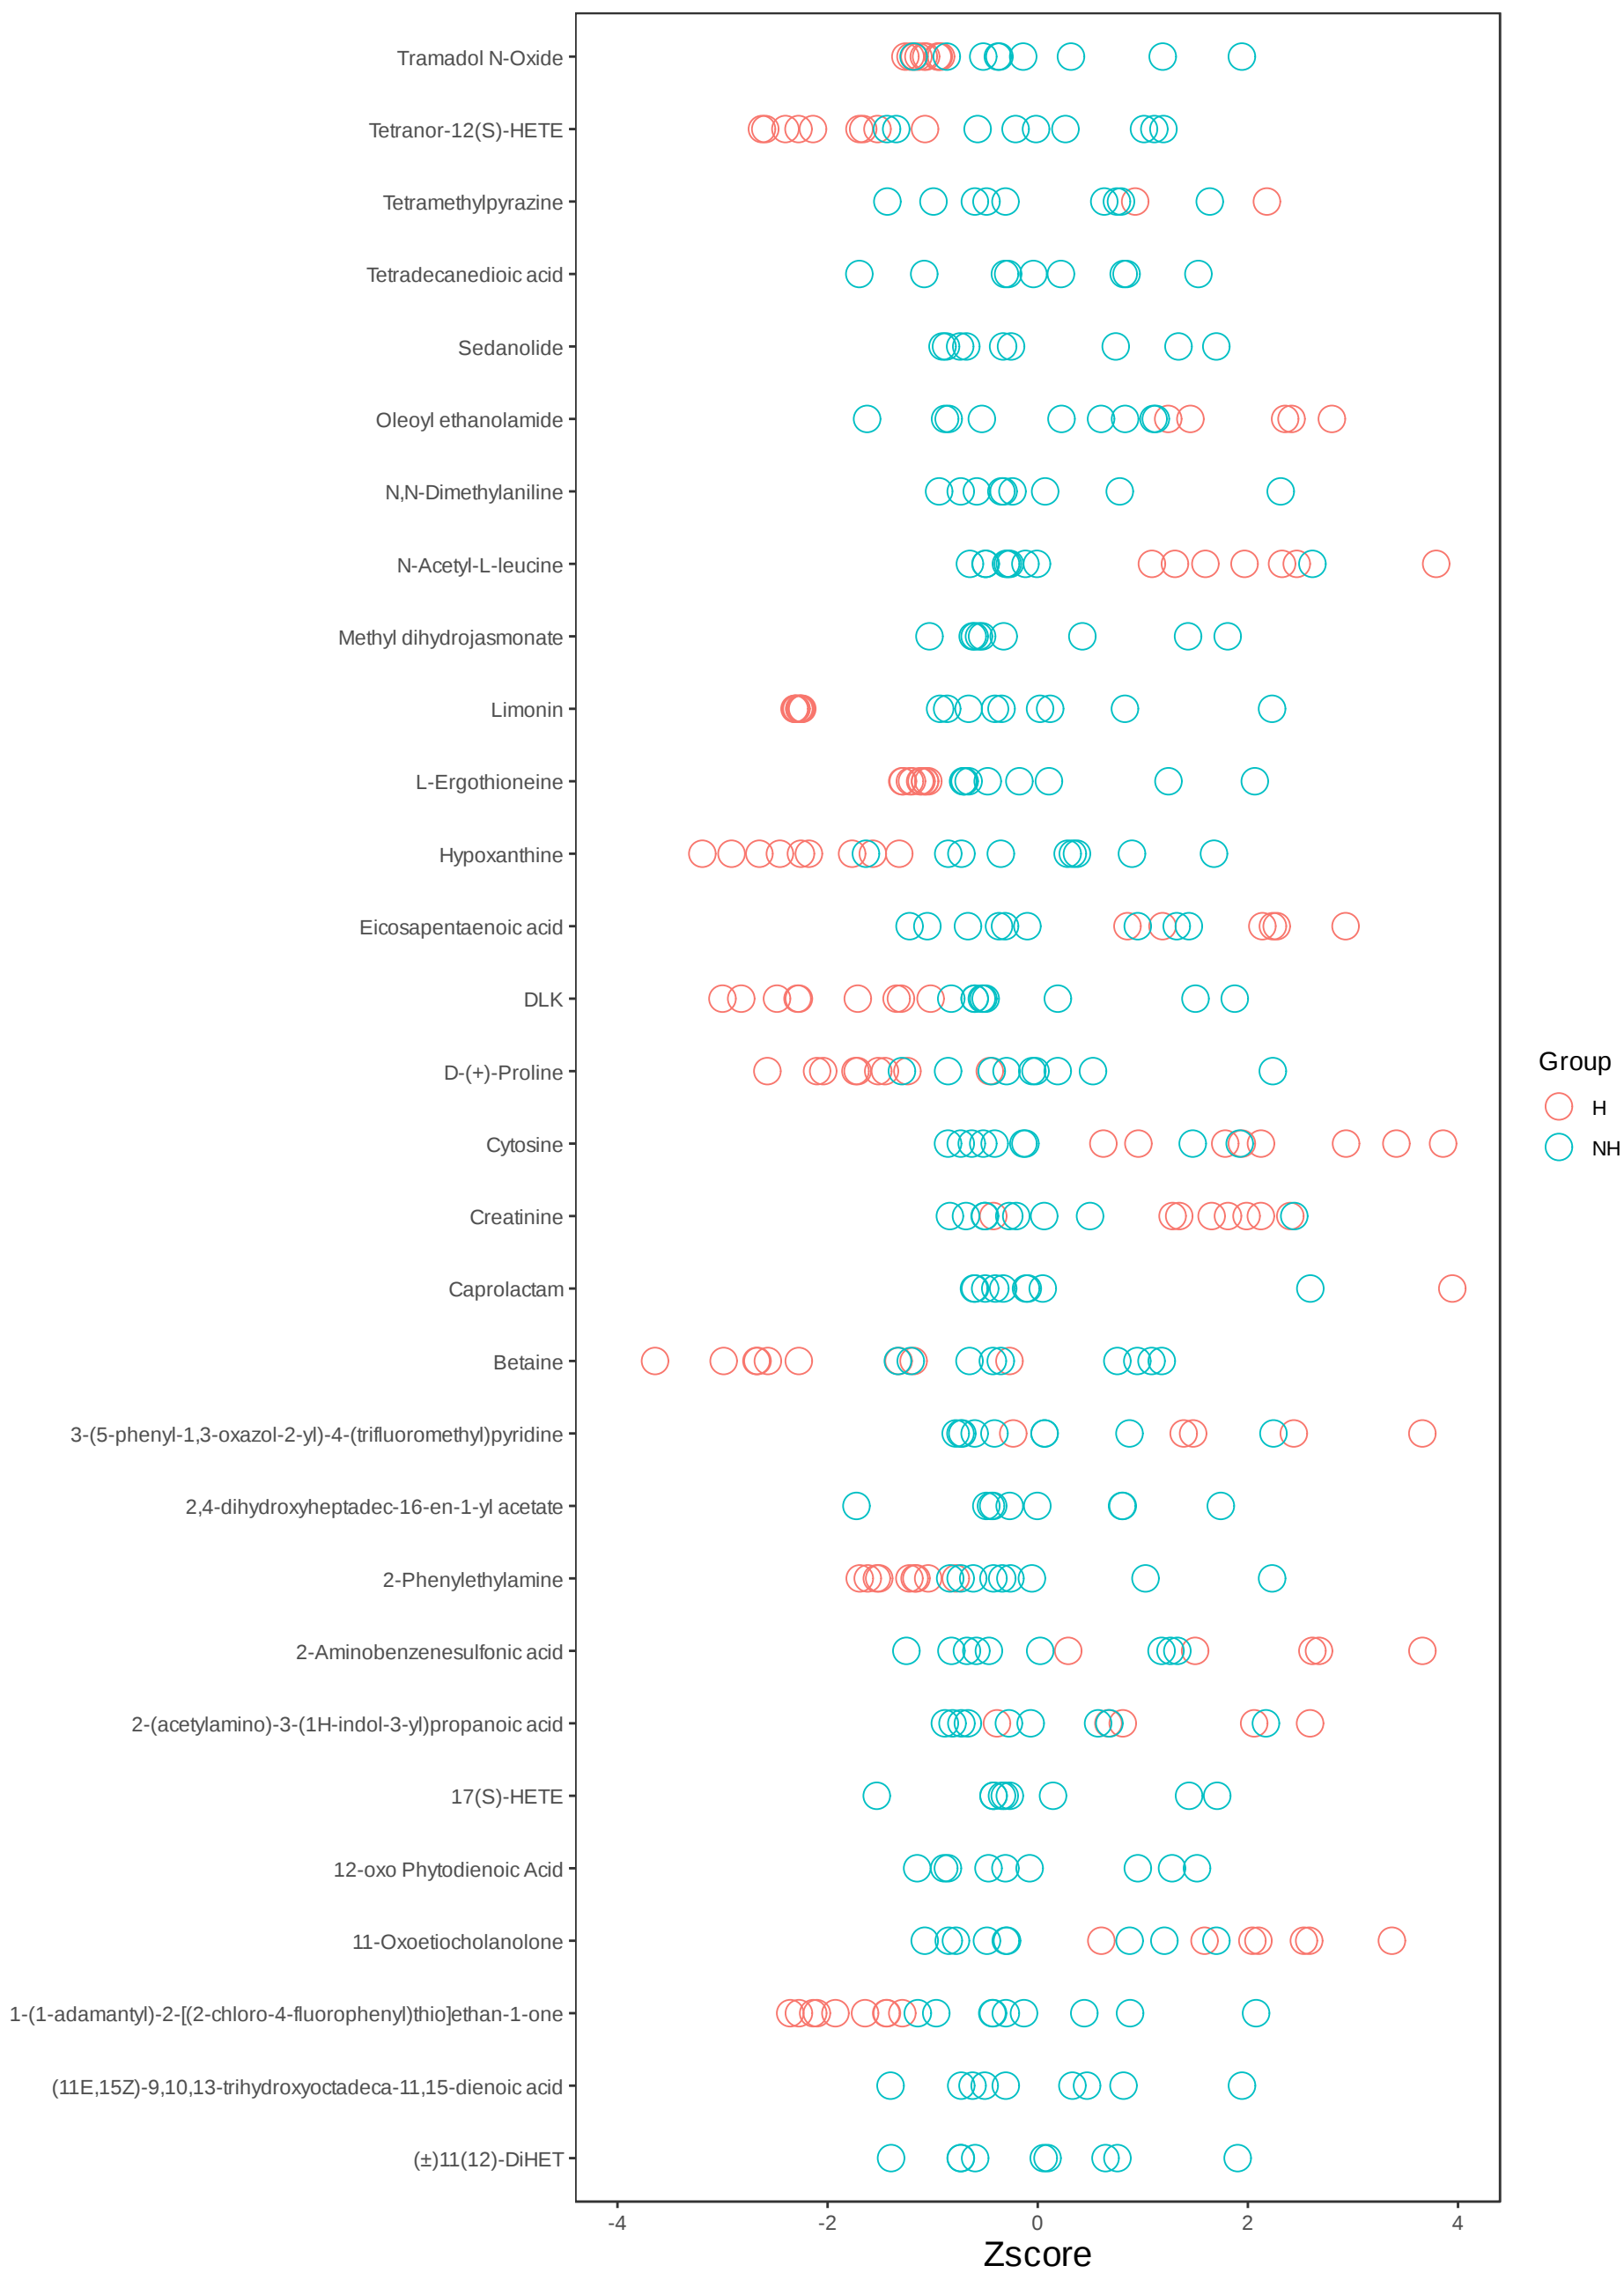

Supplement: RawDataResult.zip [file RawDataResult.zip]

H.vs.NH

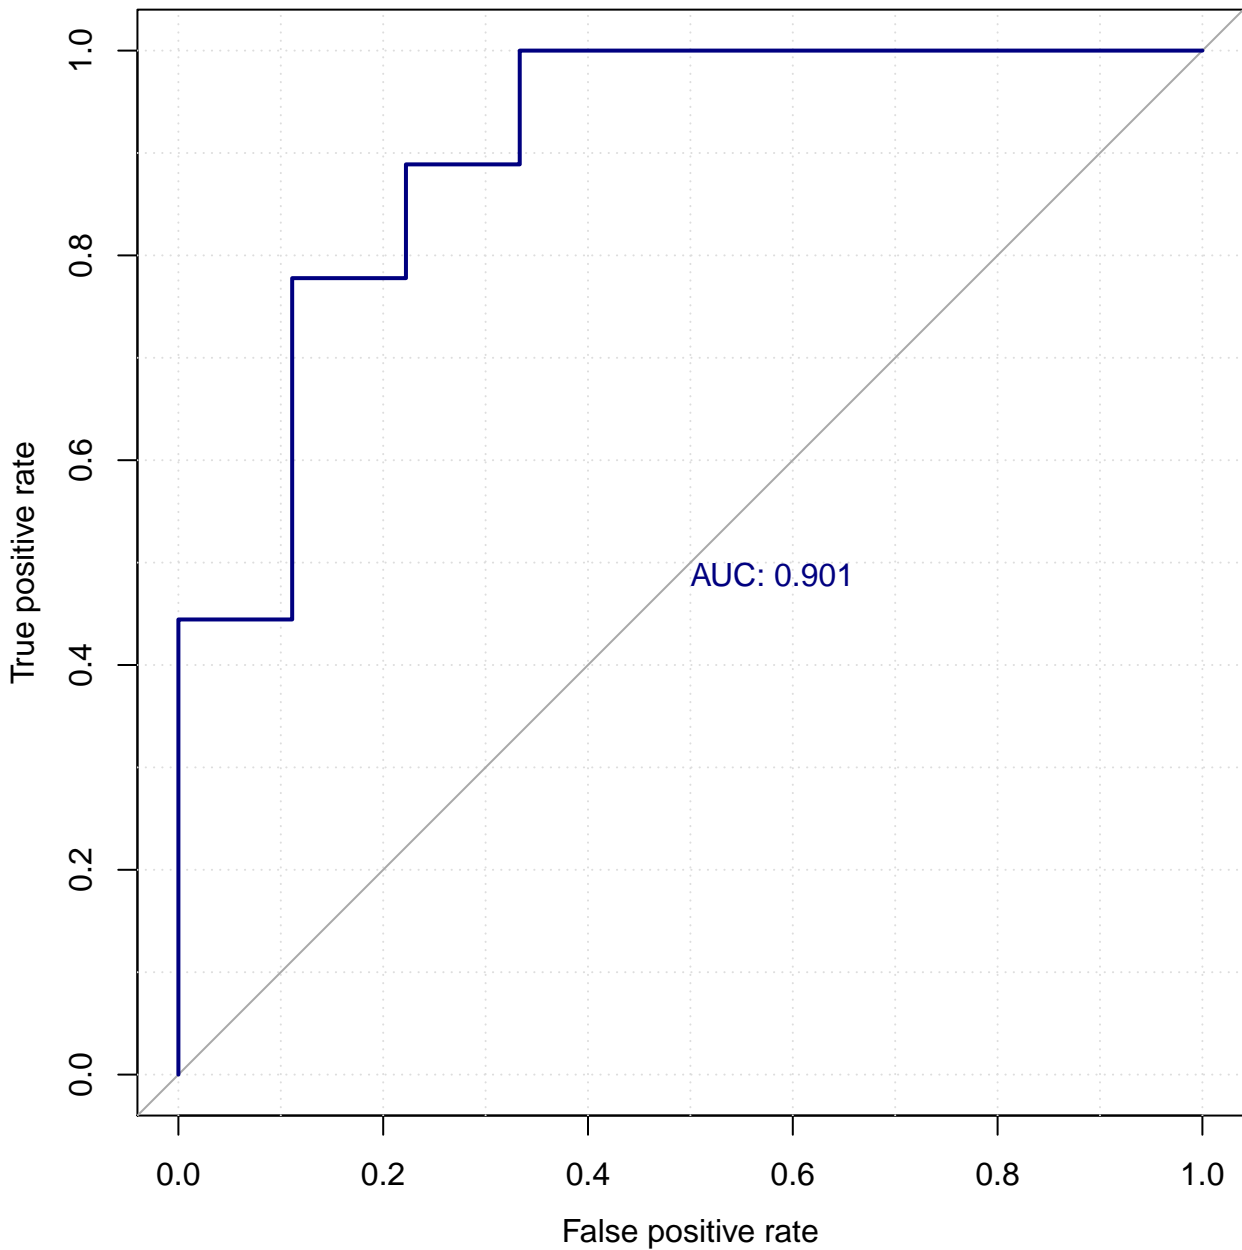

Supplement: RawDataResult.zip [file RawDataResult.zip]

# H.vs.NH



Supplement: RawDataResult.zip [file RawDataResult.zip]

# H.vs.NH

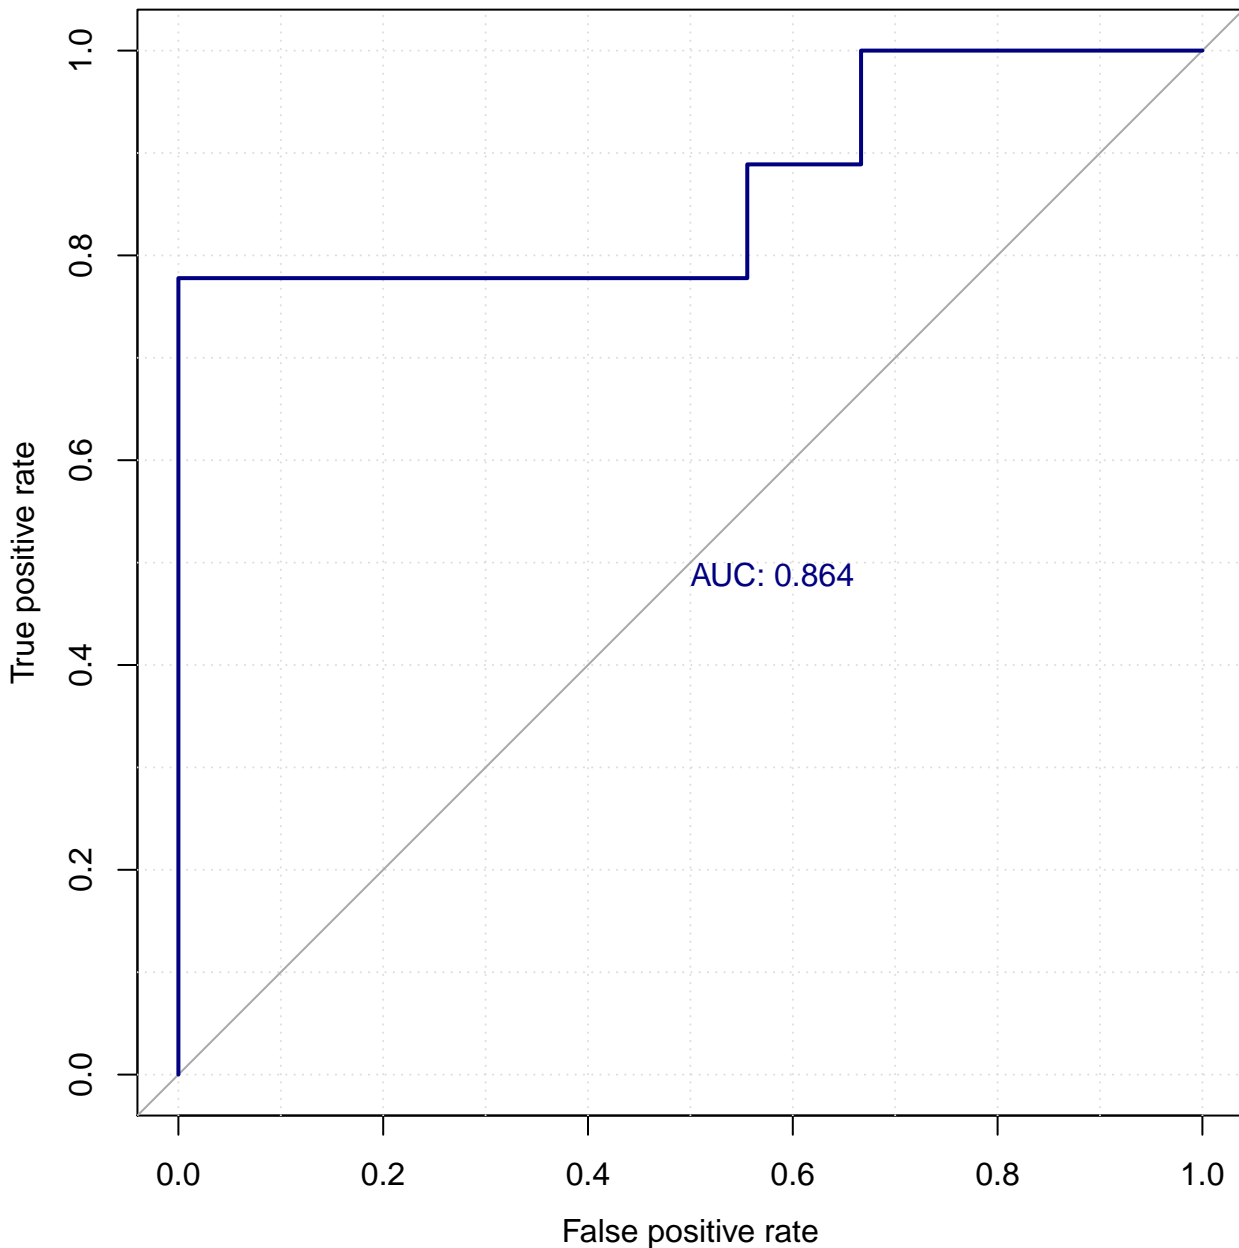

Supplement: RawDataResult.zip [file RawDataResult.zip]

H.vs.NH

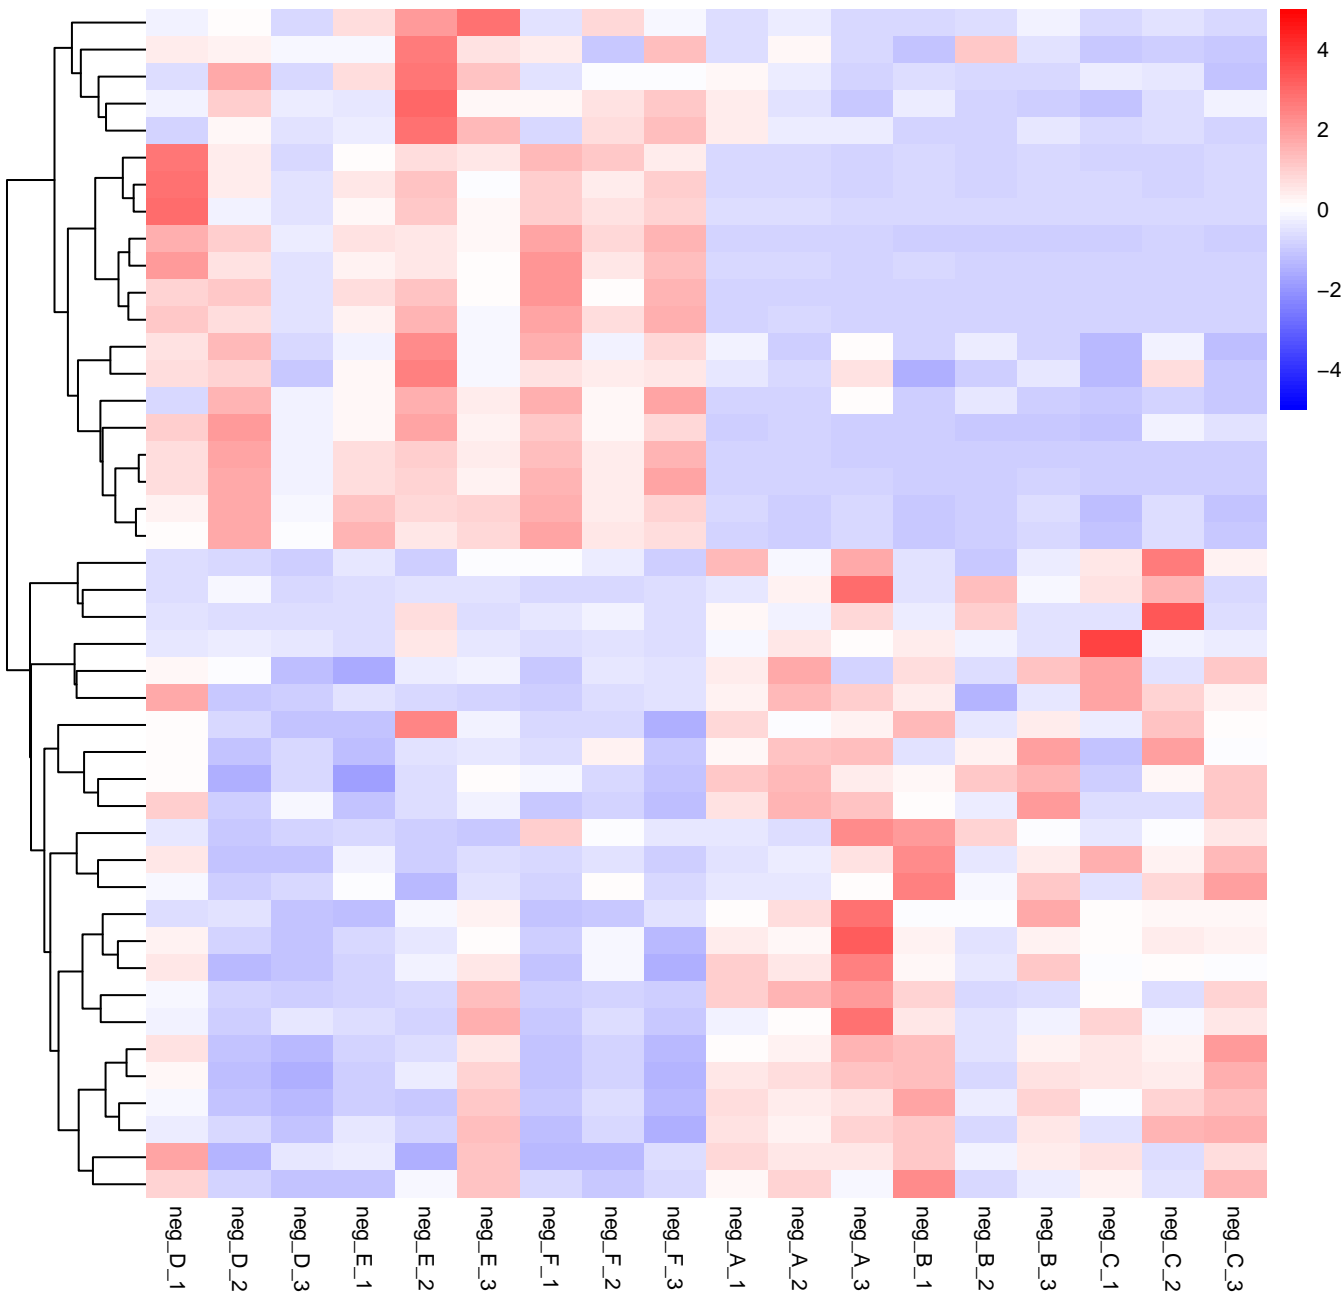

Supplement: RawDataResult.zip [file RawDataResult.zip]

# H.vs.NH

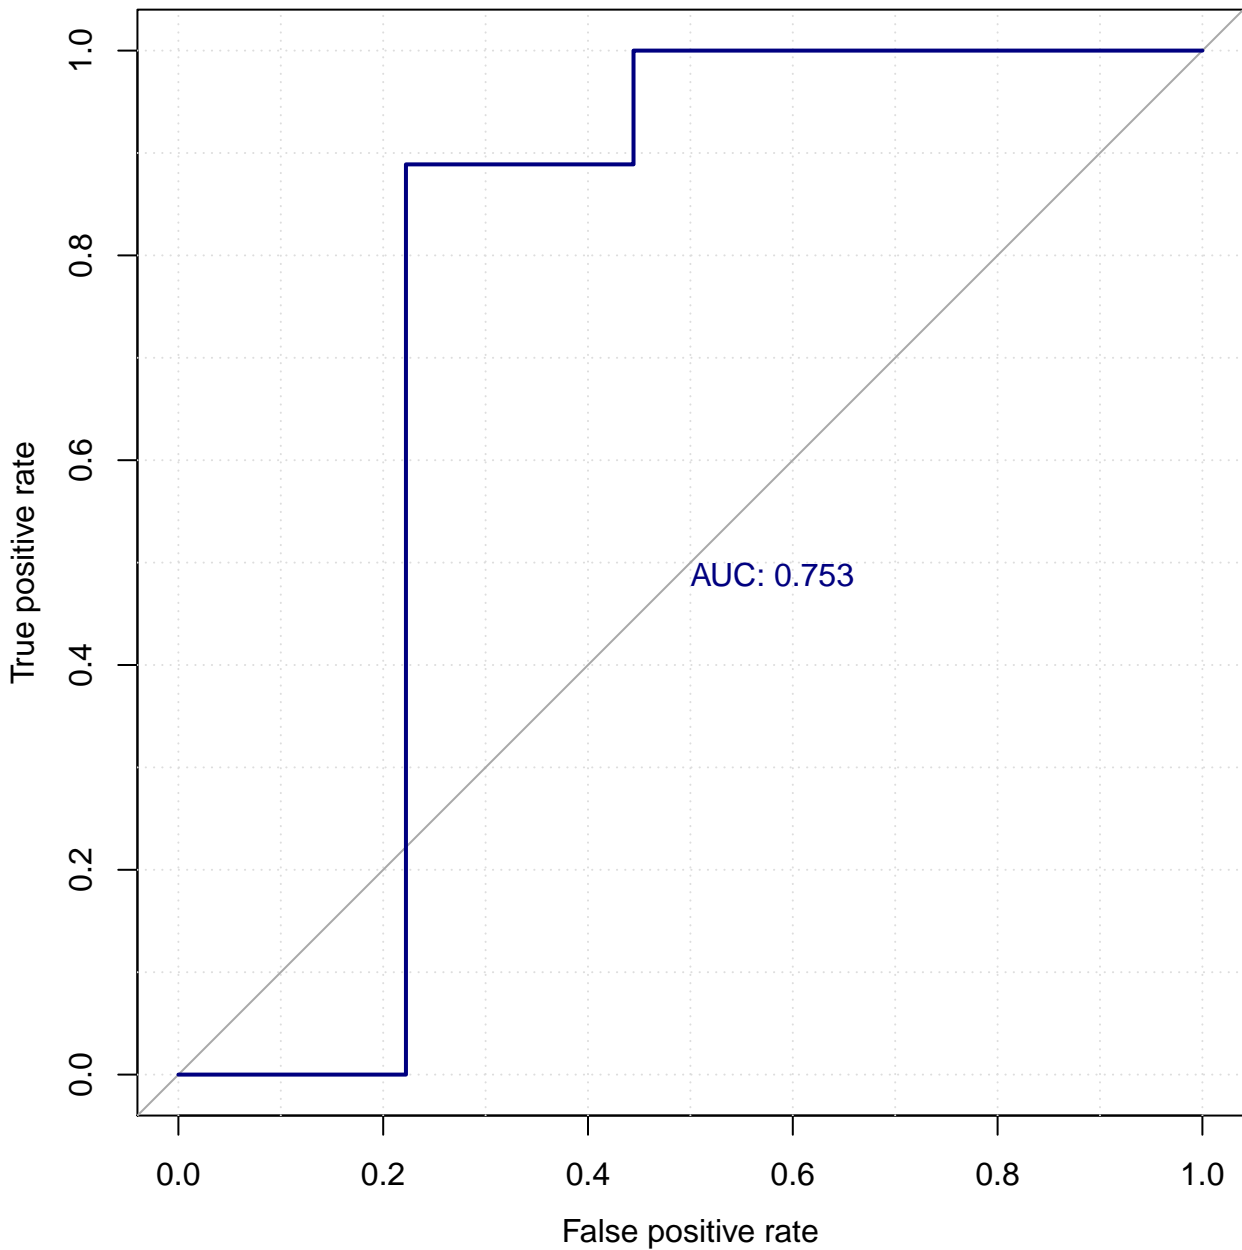

Supplement: RawDataResult.zip [file RawDataResult.zip]

# H.vs.NH

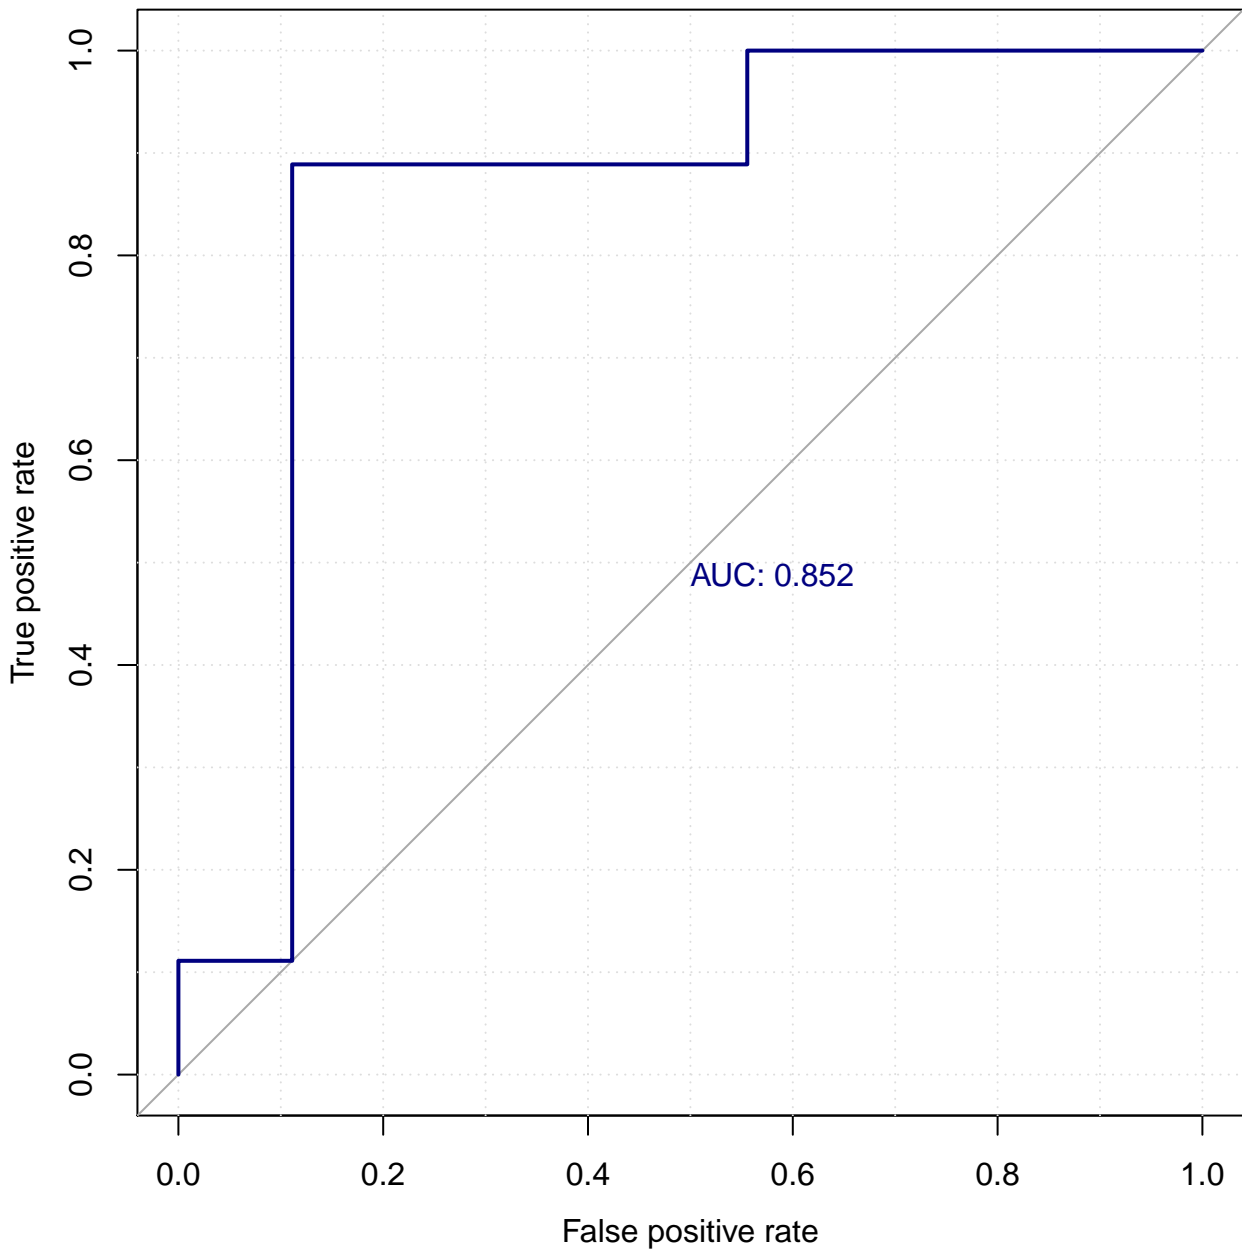

Supplement: RawDataResult.zip [file RawDataResult.zip]

# H.vs.NH

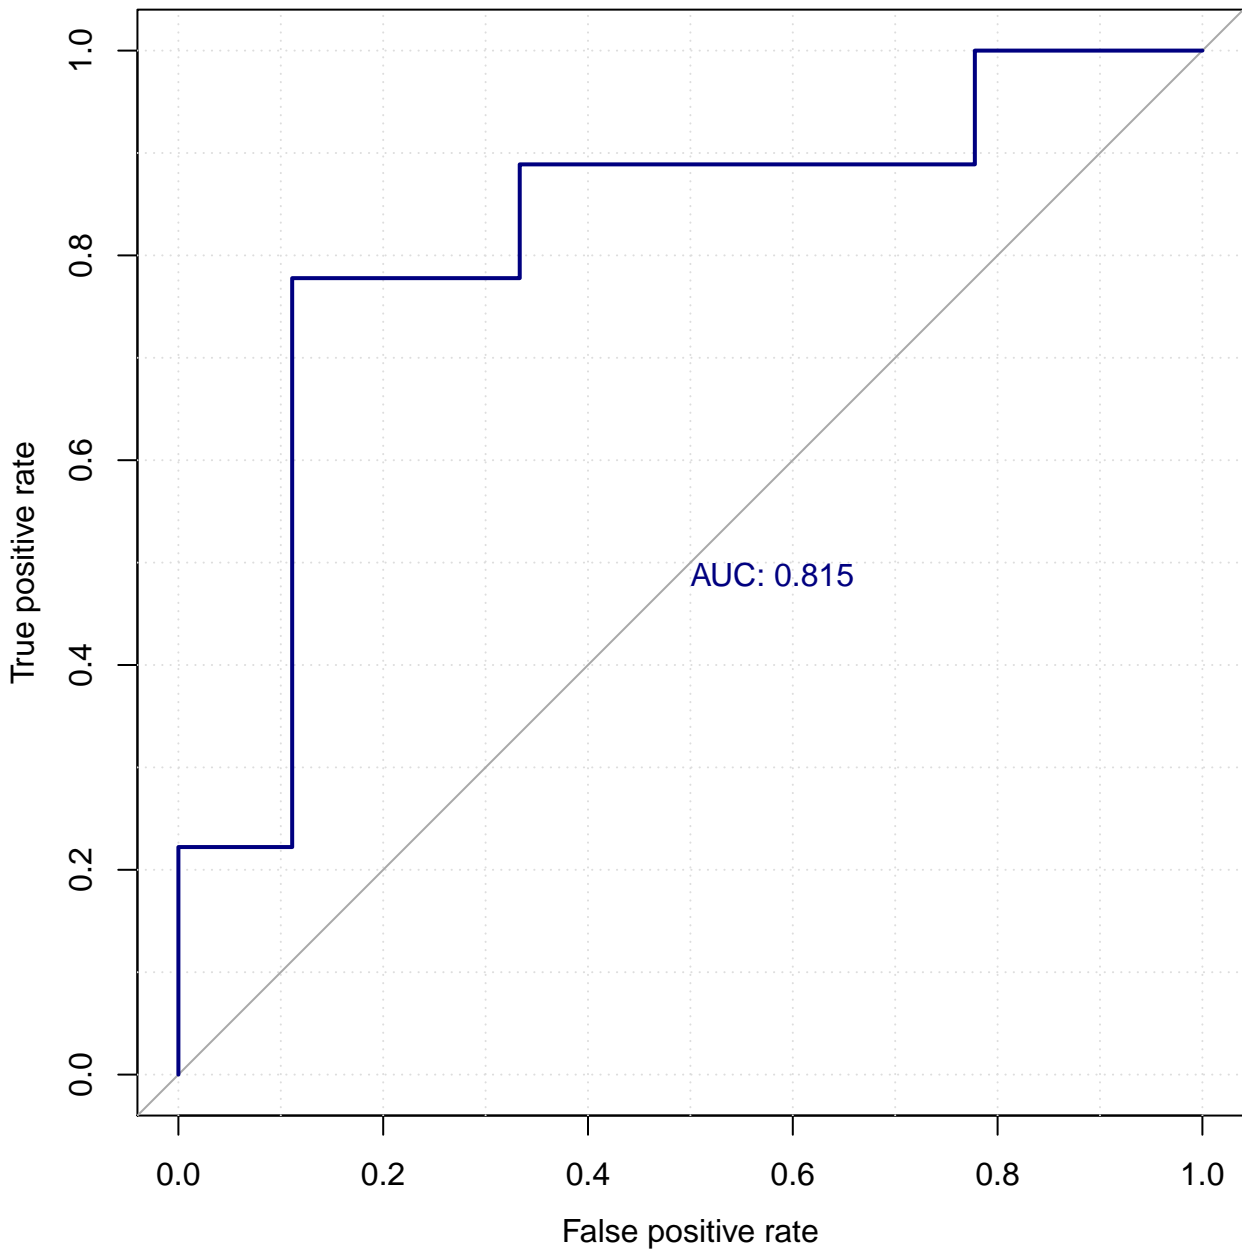

Supplement: RawDataResult.zip [file RawDataResult.zip]

# H.vs.NH

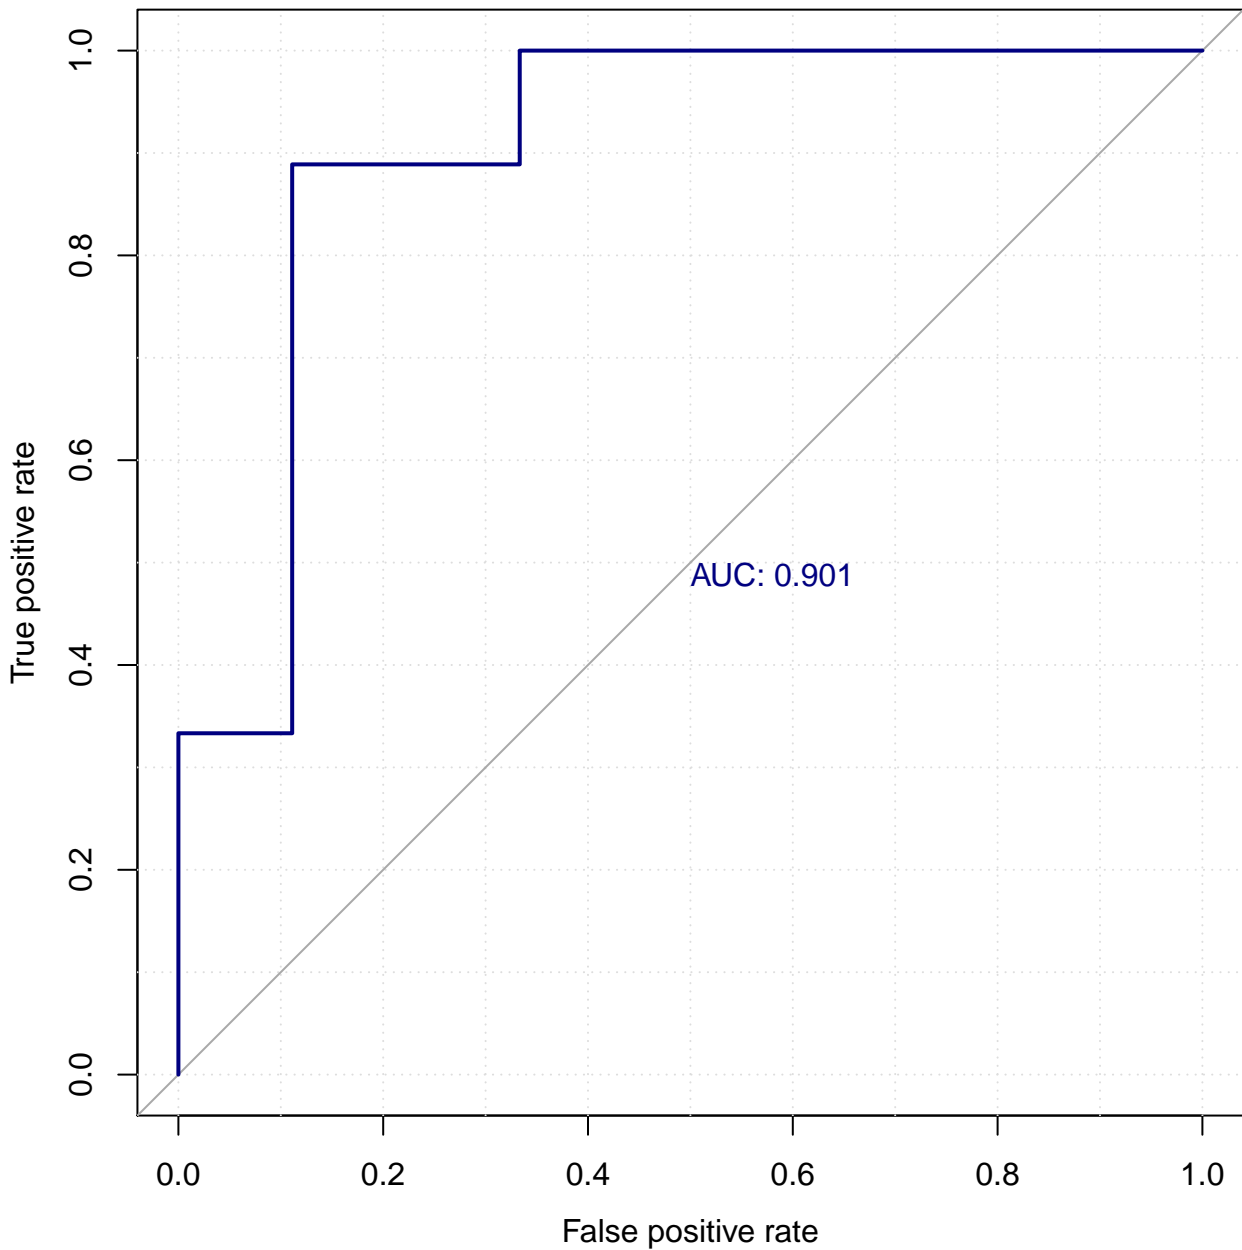

Supplement: RawDataResult.zip [file RawDataResult.zip]

## H.vs.NH

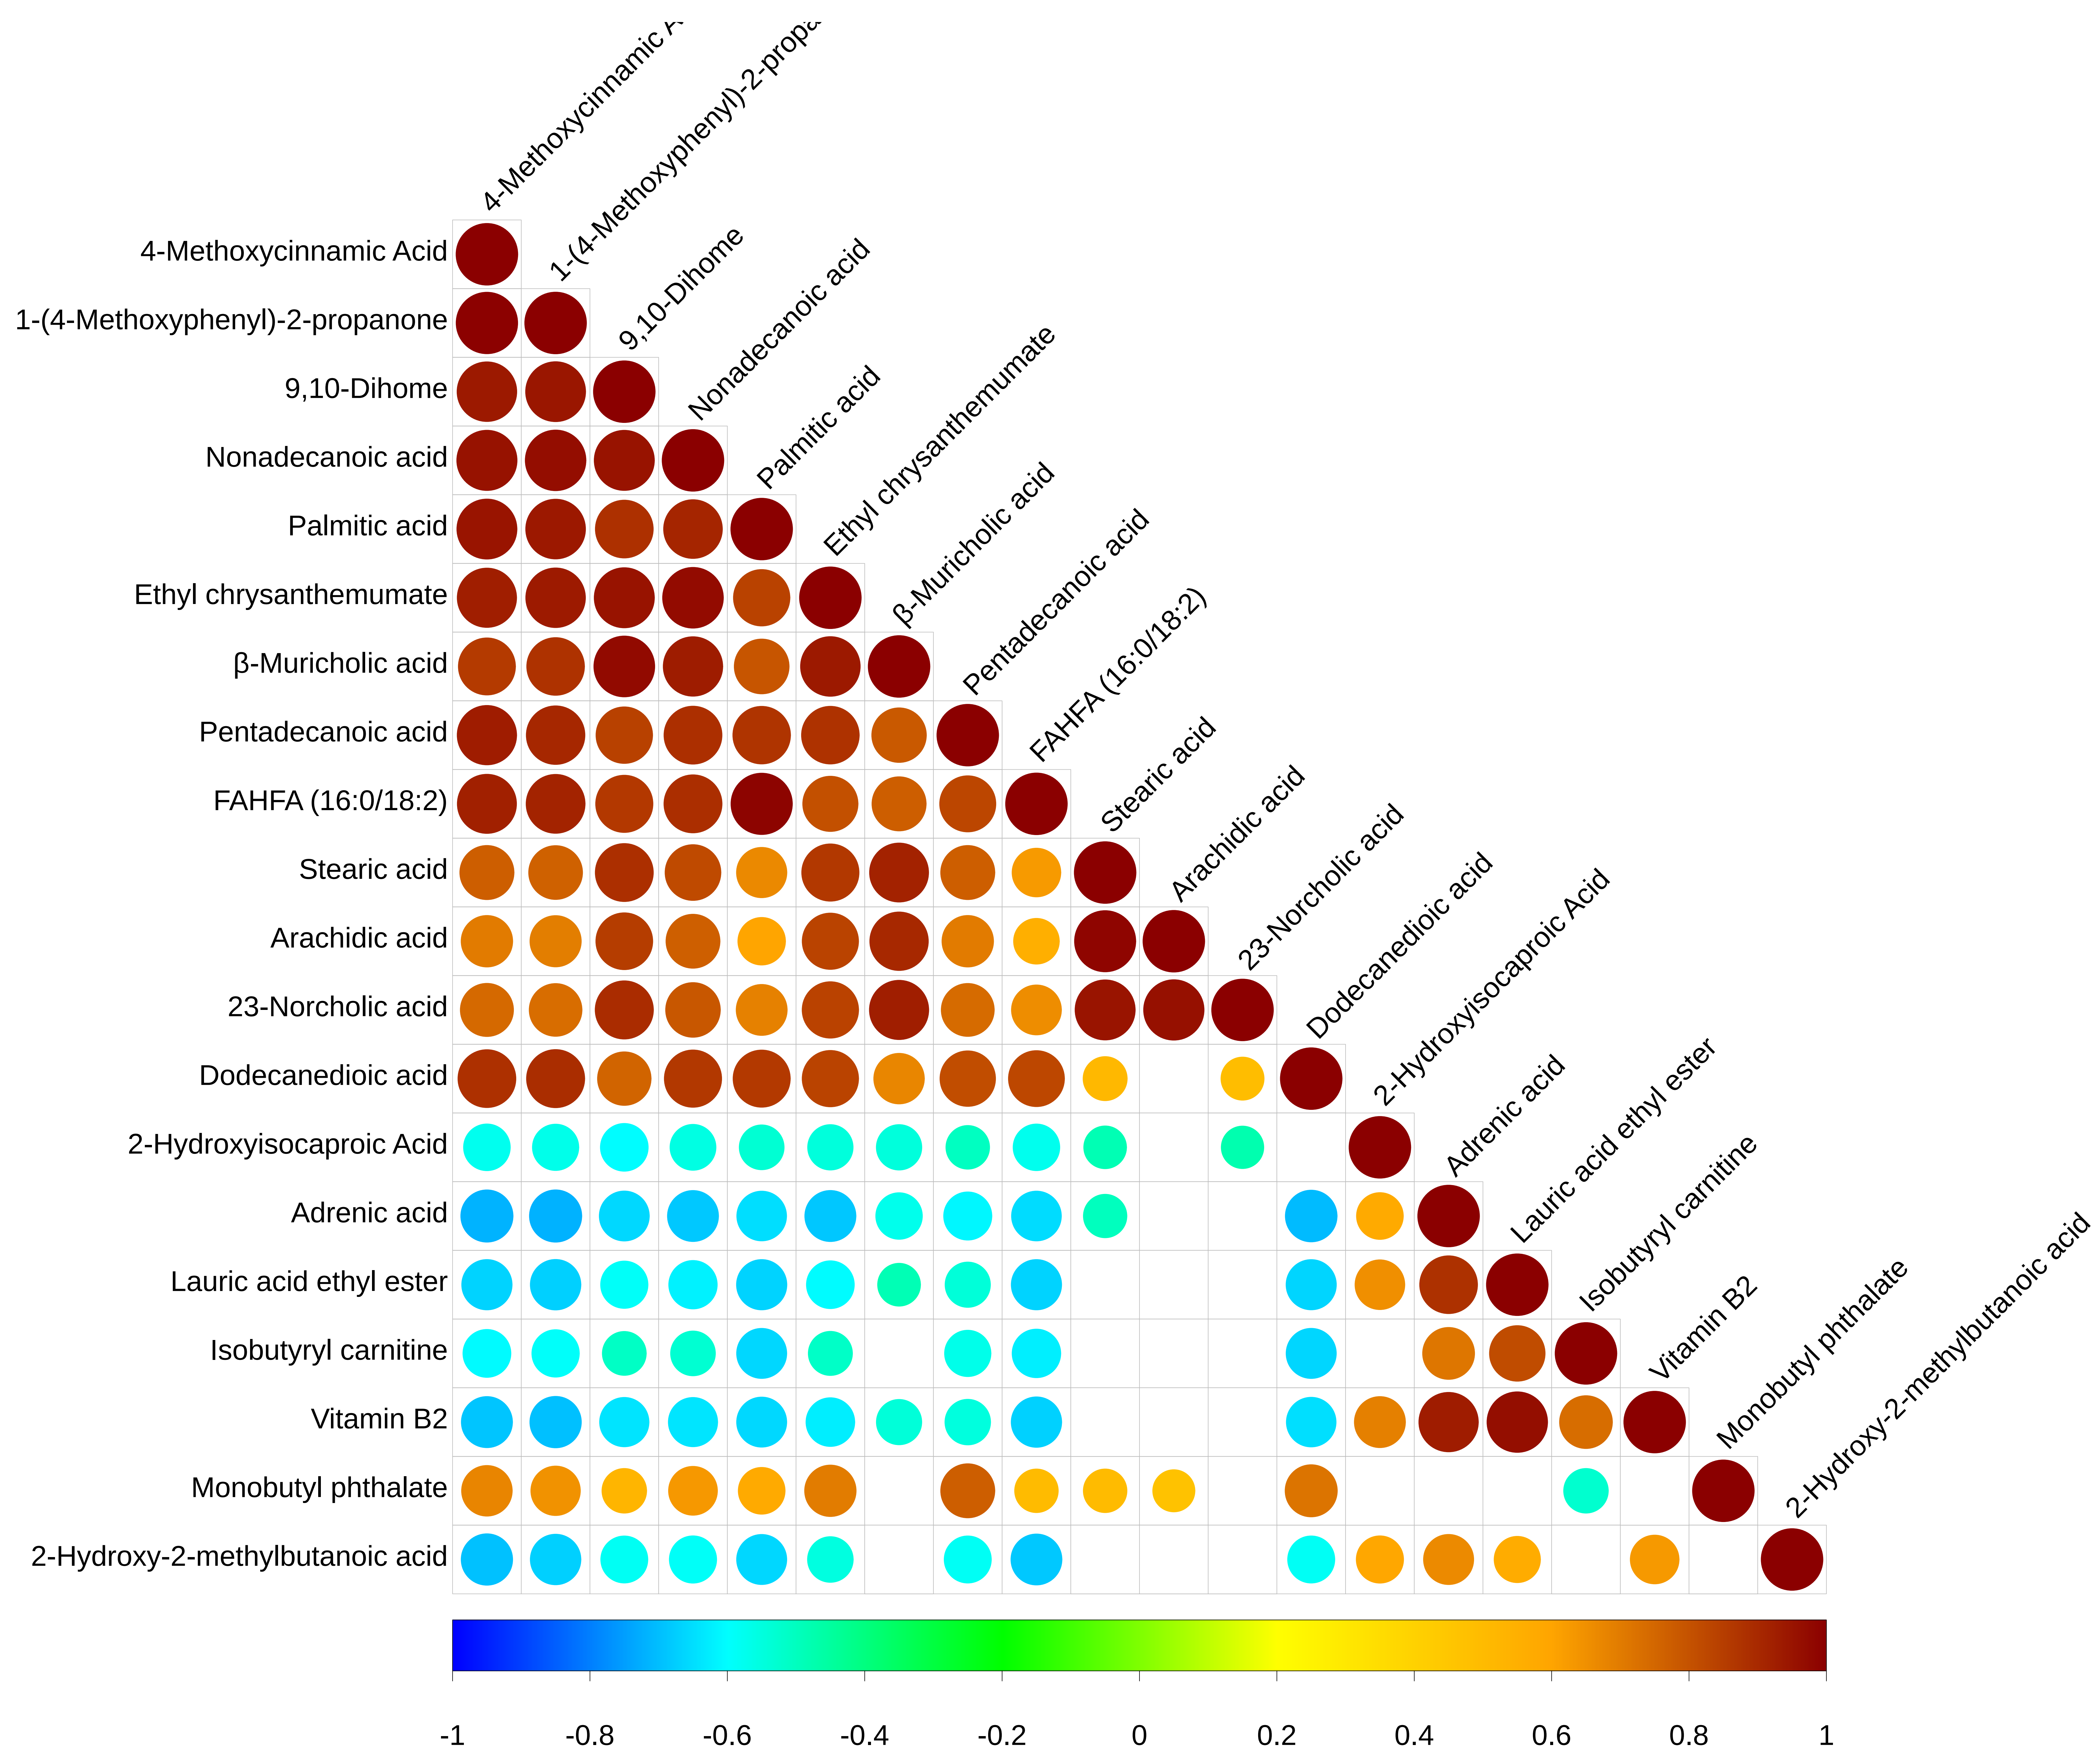

Supplement: RawDataResult.zip [file RawDataResult.zip]

H.vs.NH

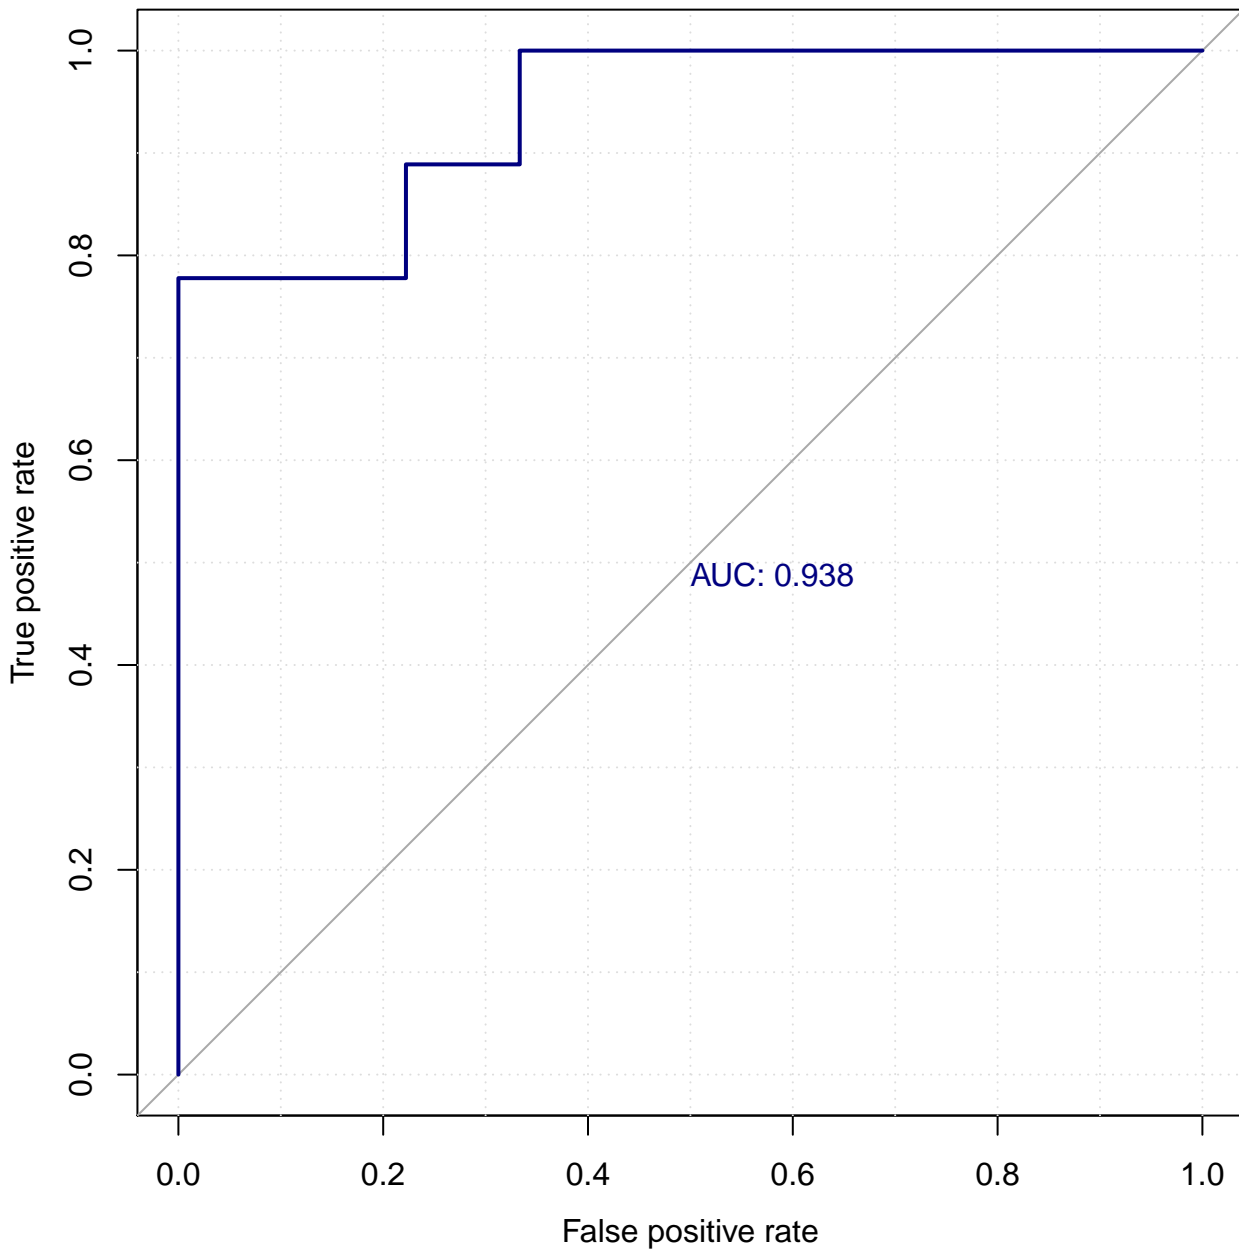

Supplement: RawDataResult.zip [file RawDataResult.zip]

# H.vs.NH

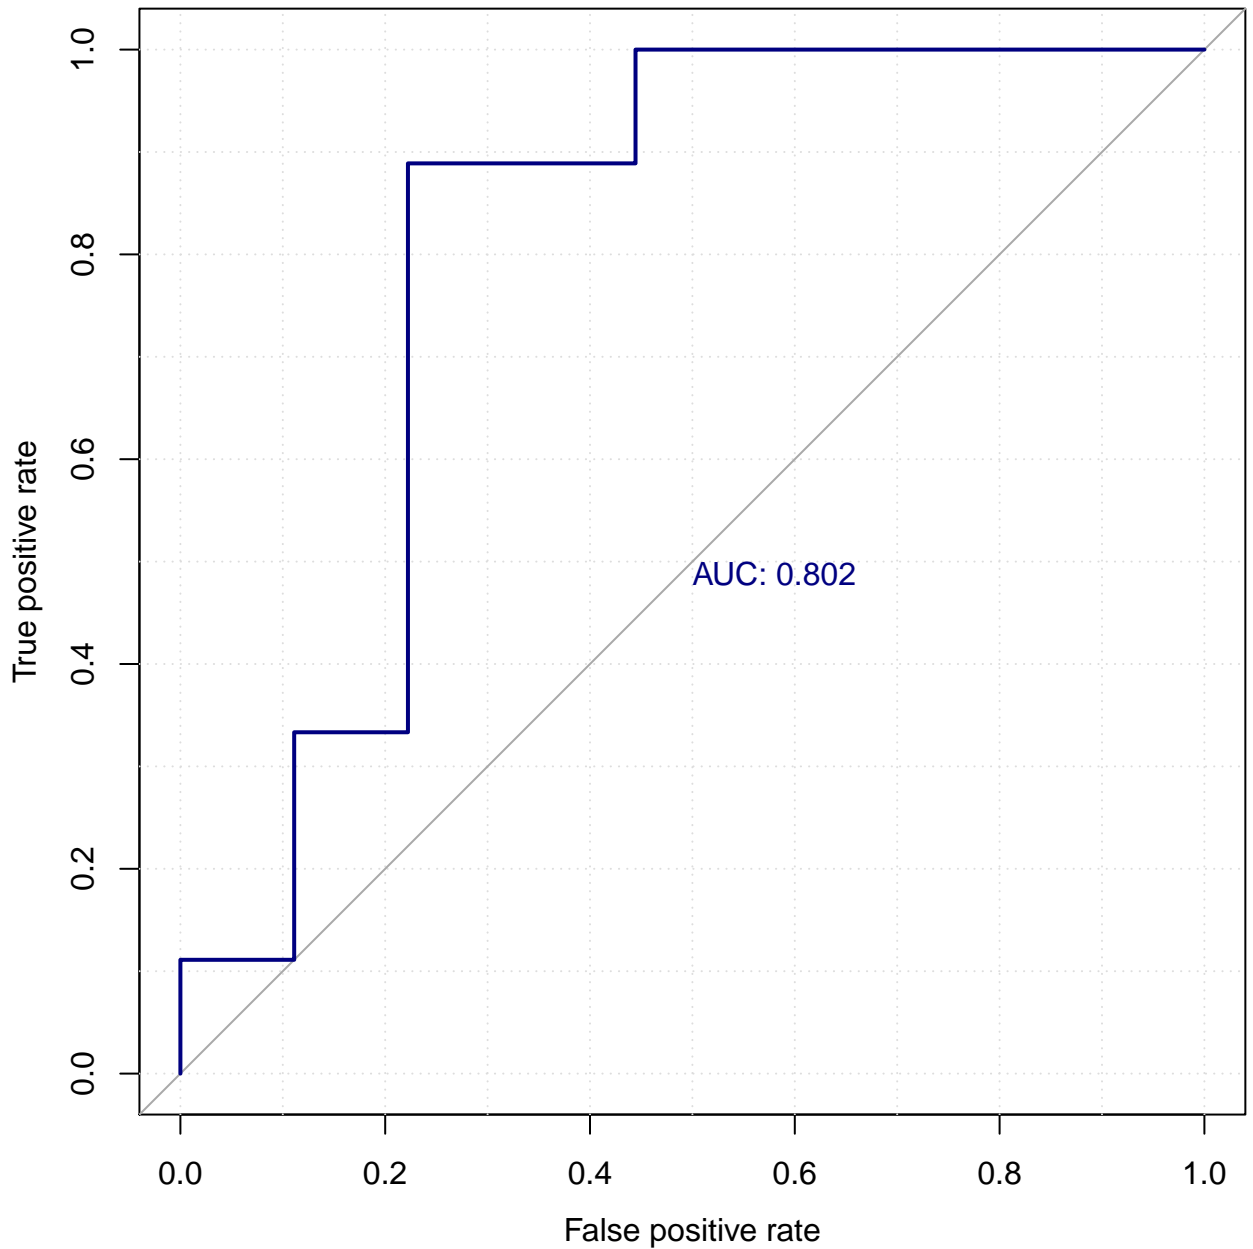

Supplement: RawDataResult.zip [file RawDataResult.zip]

# H.vs.NH

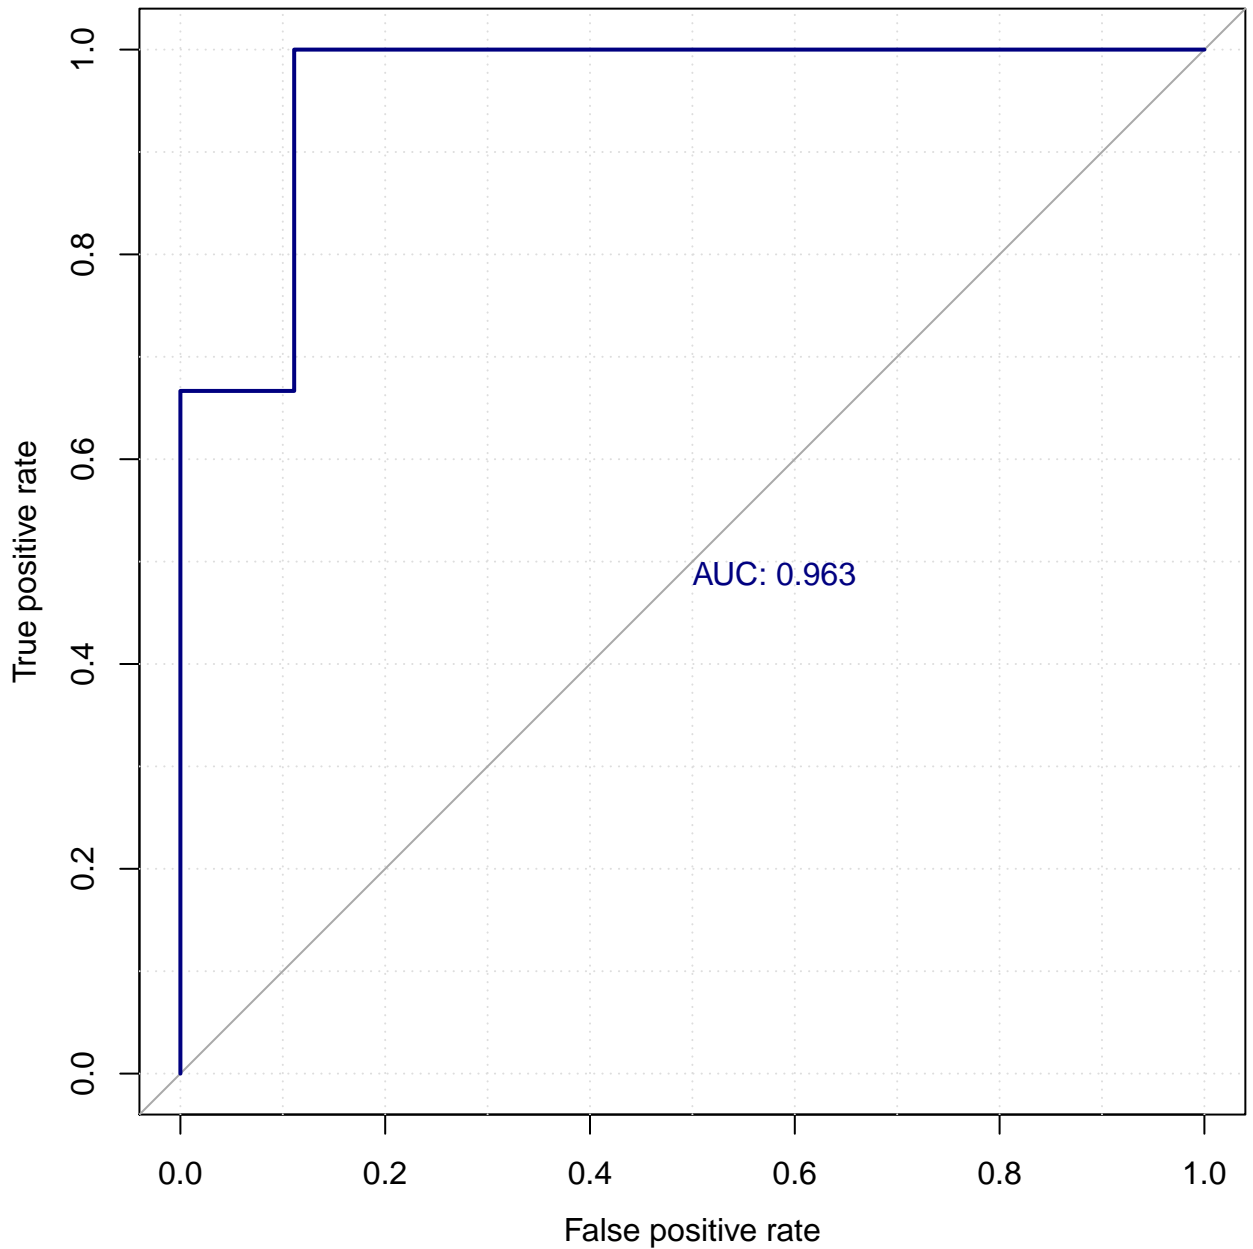

Supplement: RawDataResult.zip [file RawDataResult.zip]

H.vs.NH

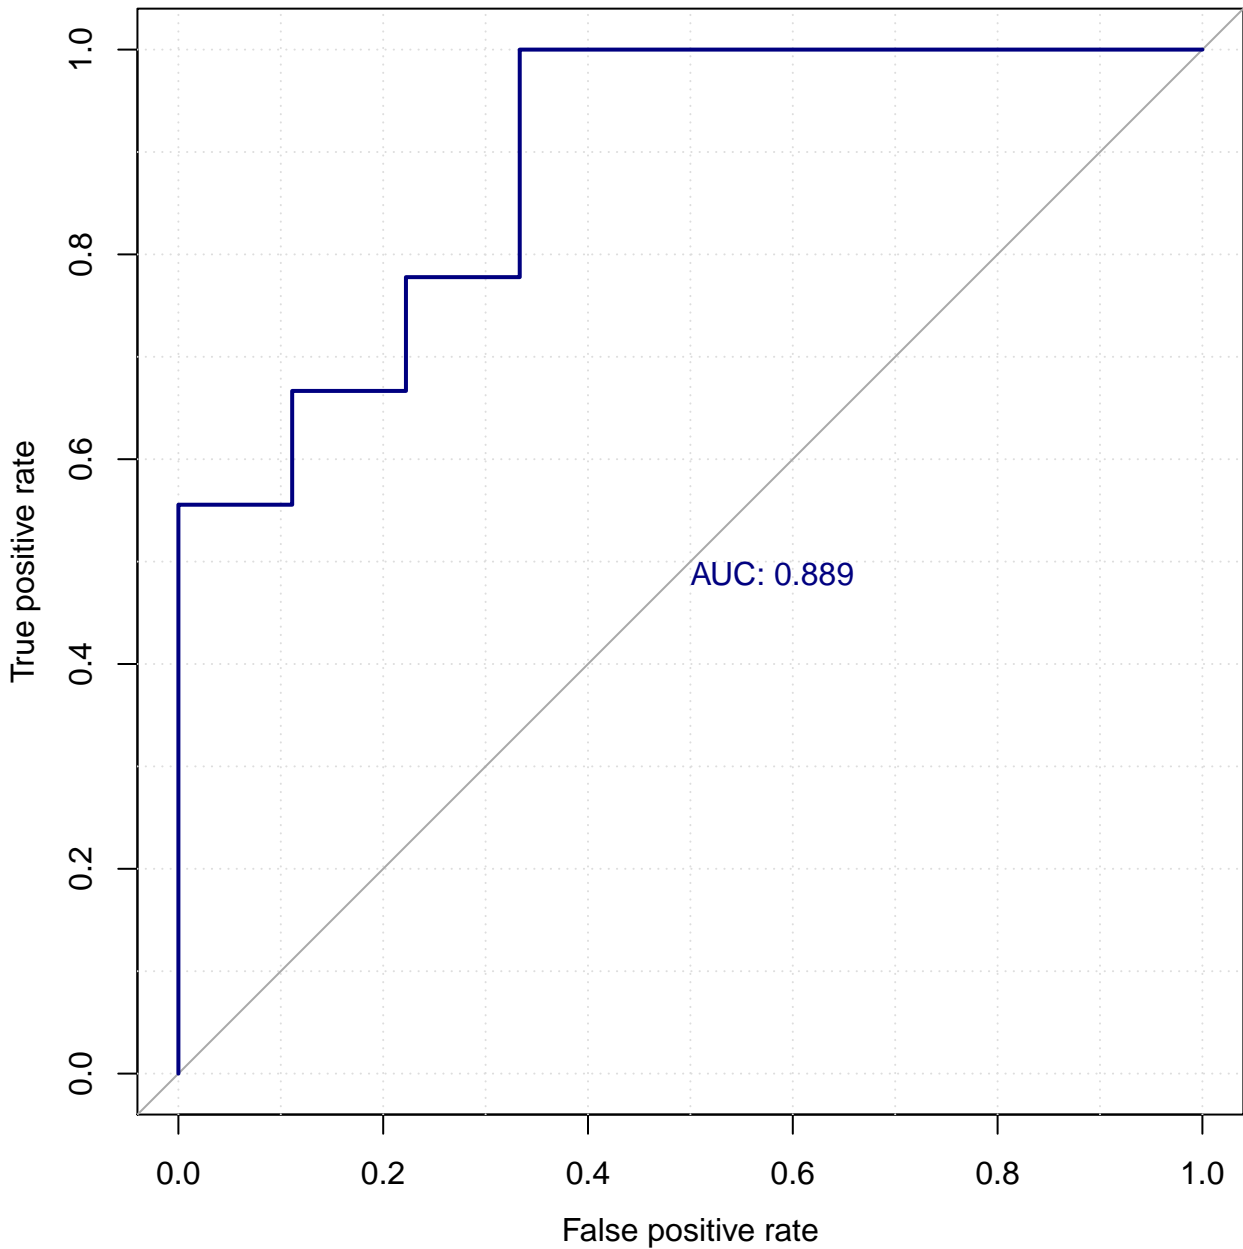

Supplement: RawDataResult.zip [file RawDataResult.zip]

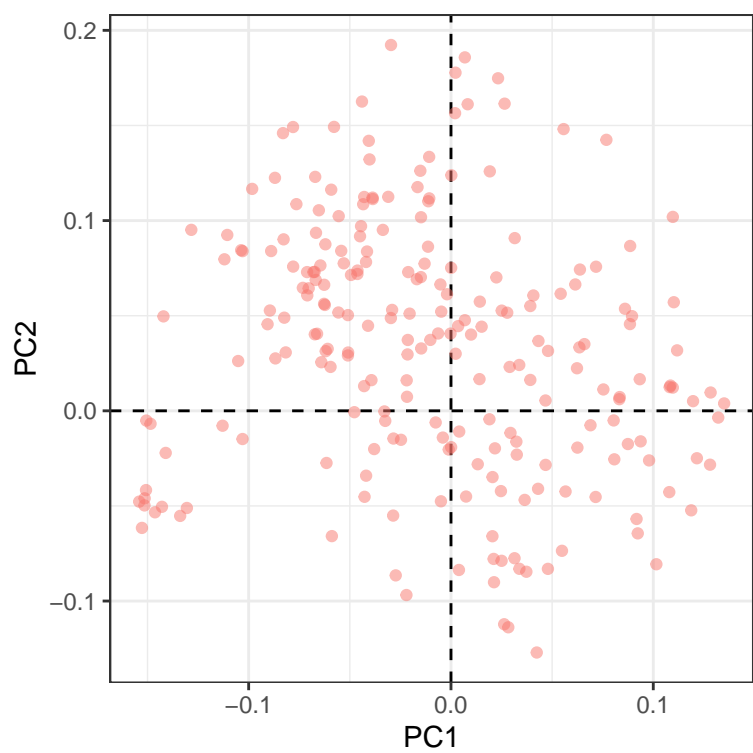

Supplement: RawDataResult.zip [file RawDataResult.zip]

H.vs.NH

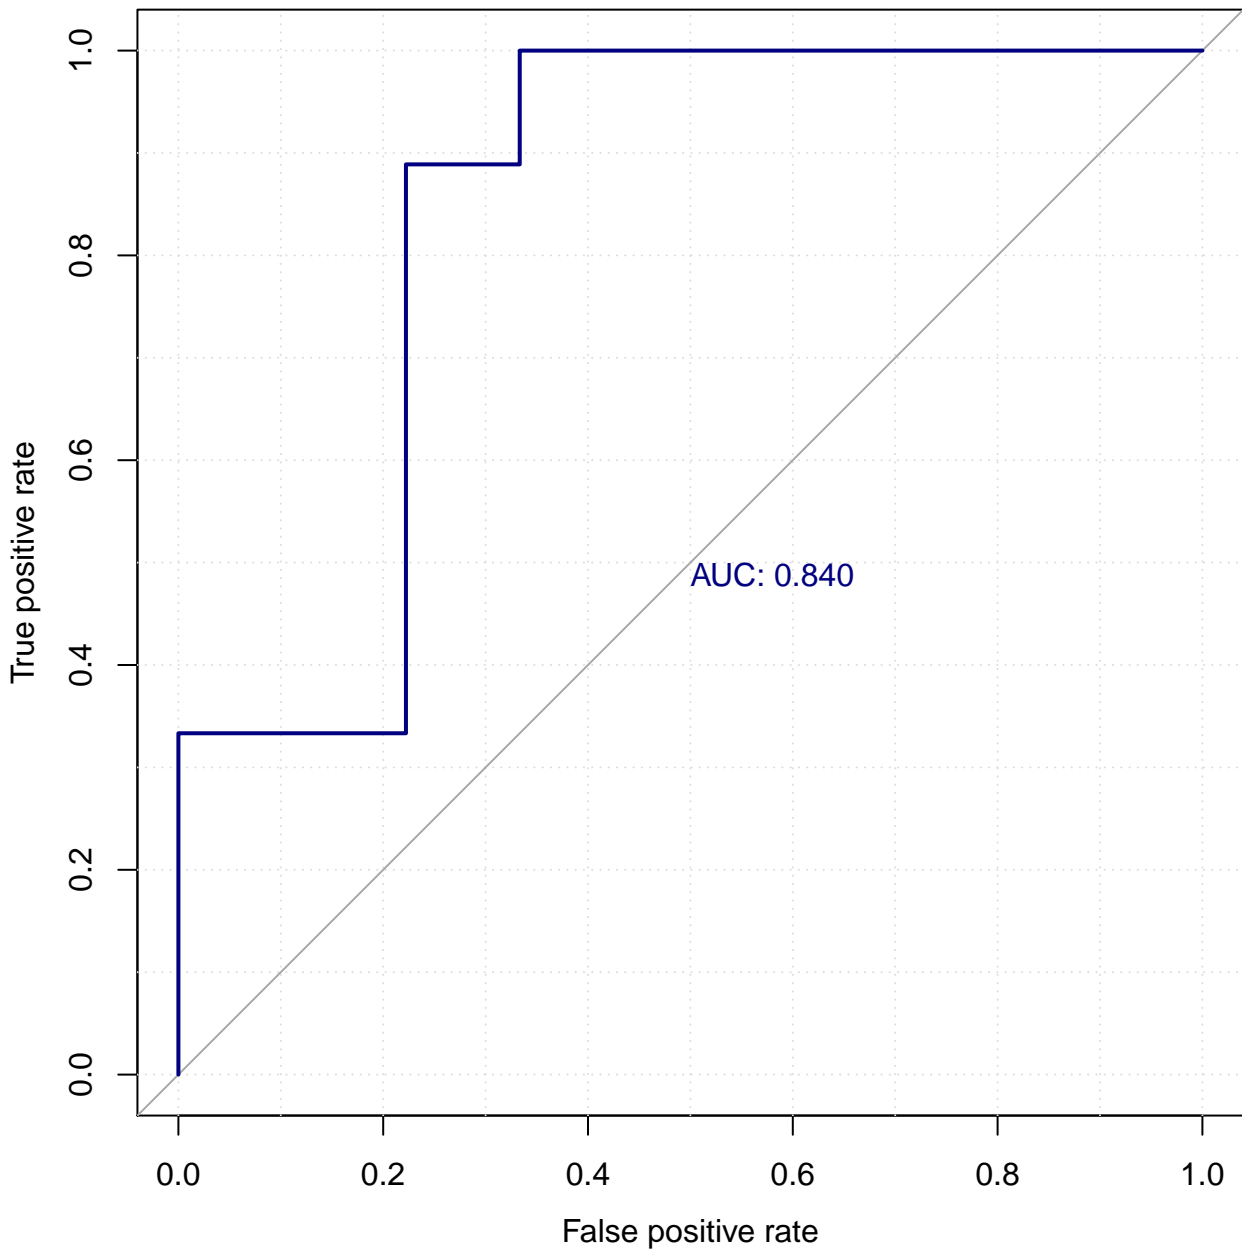

Supplement: RawDataResult.zip [file RawDataResult.zip]

# H.vs.NH

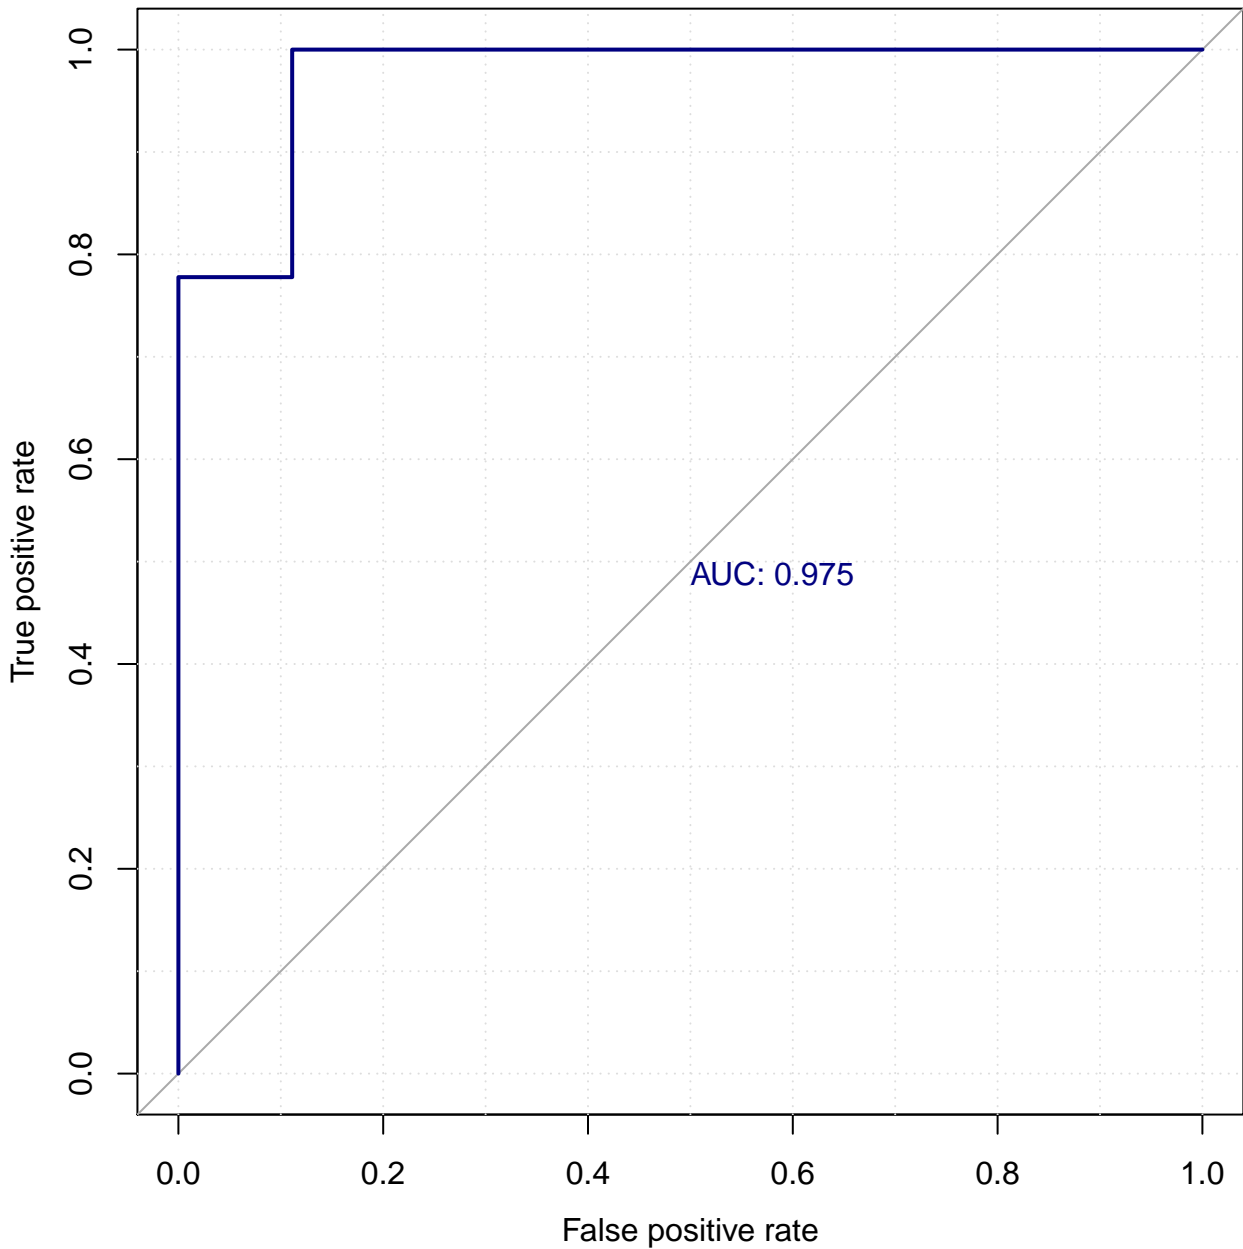

Supplement: RawDataResult.zip [file RawDataResult.zip]

H.vs.NH

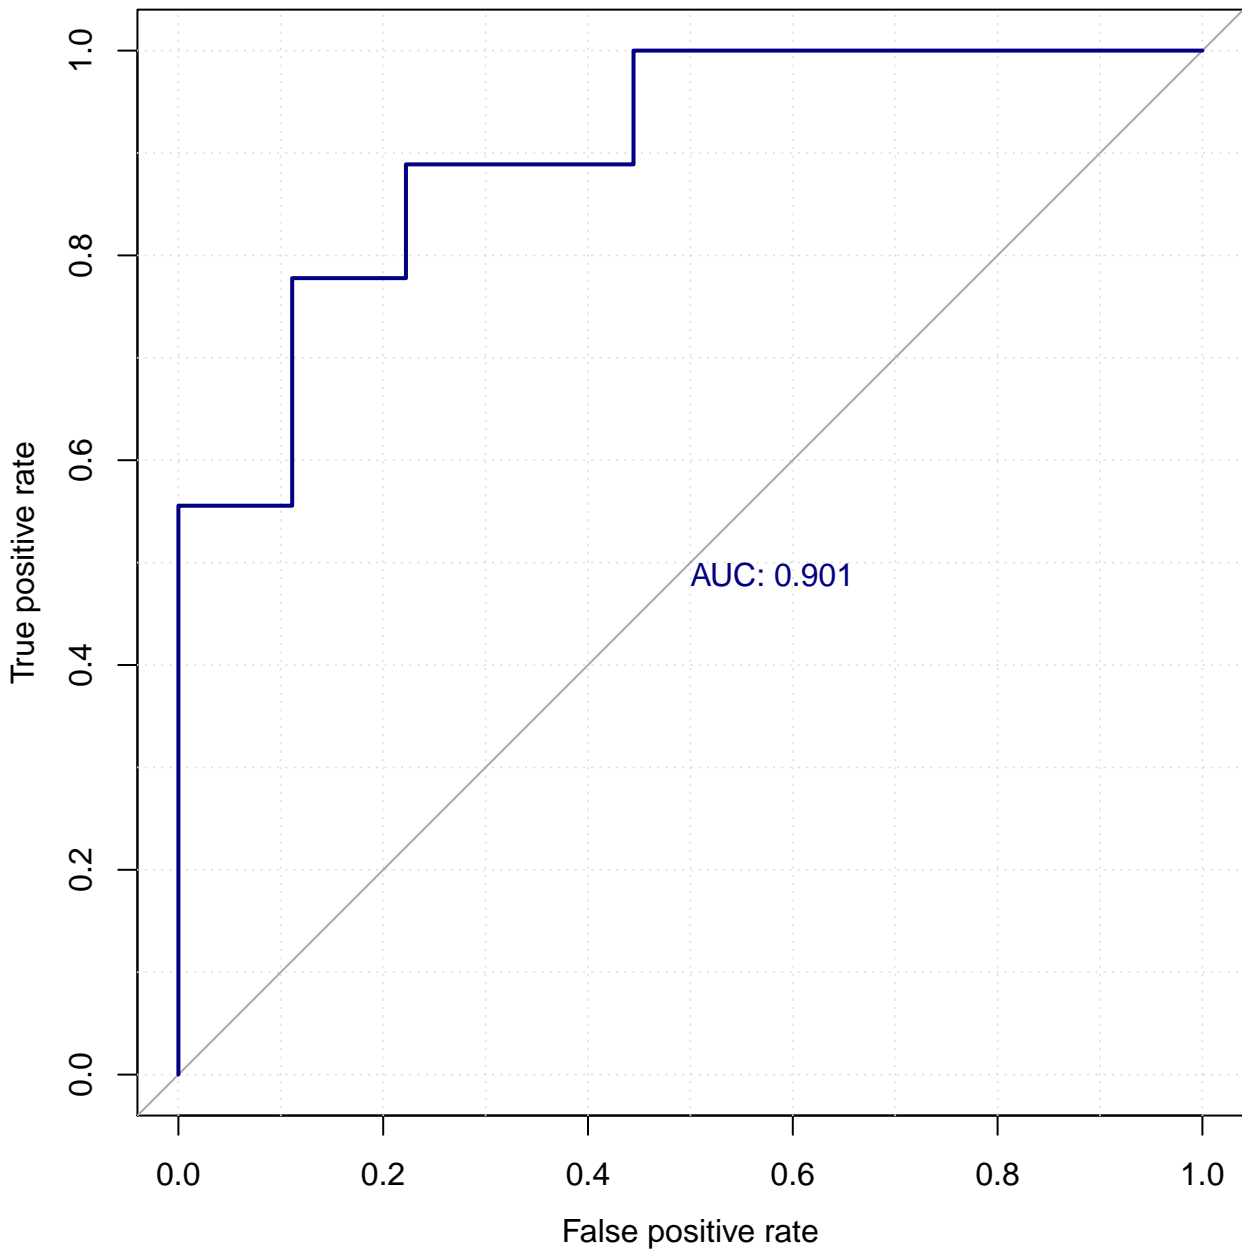

Supplement: RawDataResult.zip [file RawDataResult.zip]

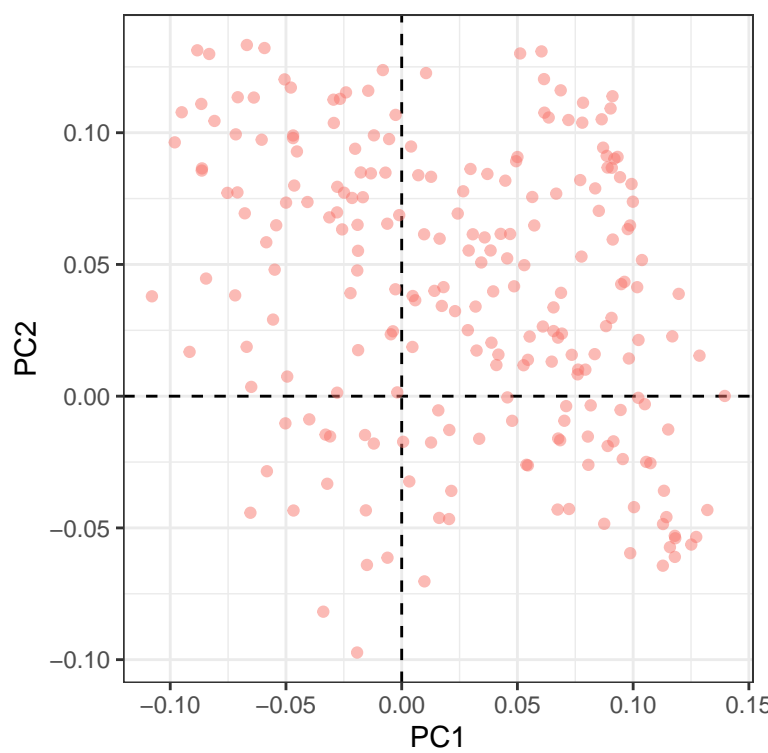

Supplement: RawDataResult.zip [file RawDataResult.zip]

# H.vs.NH

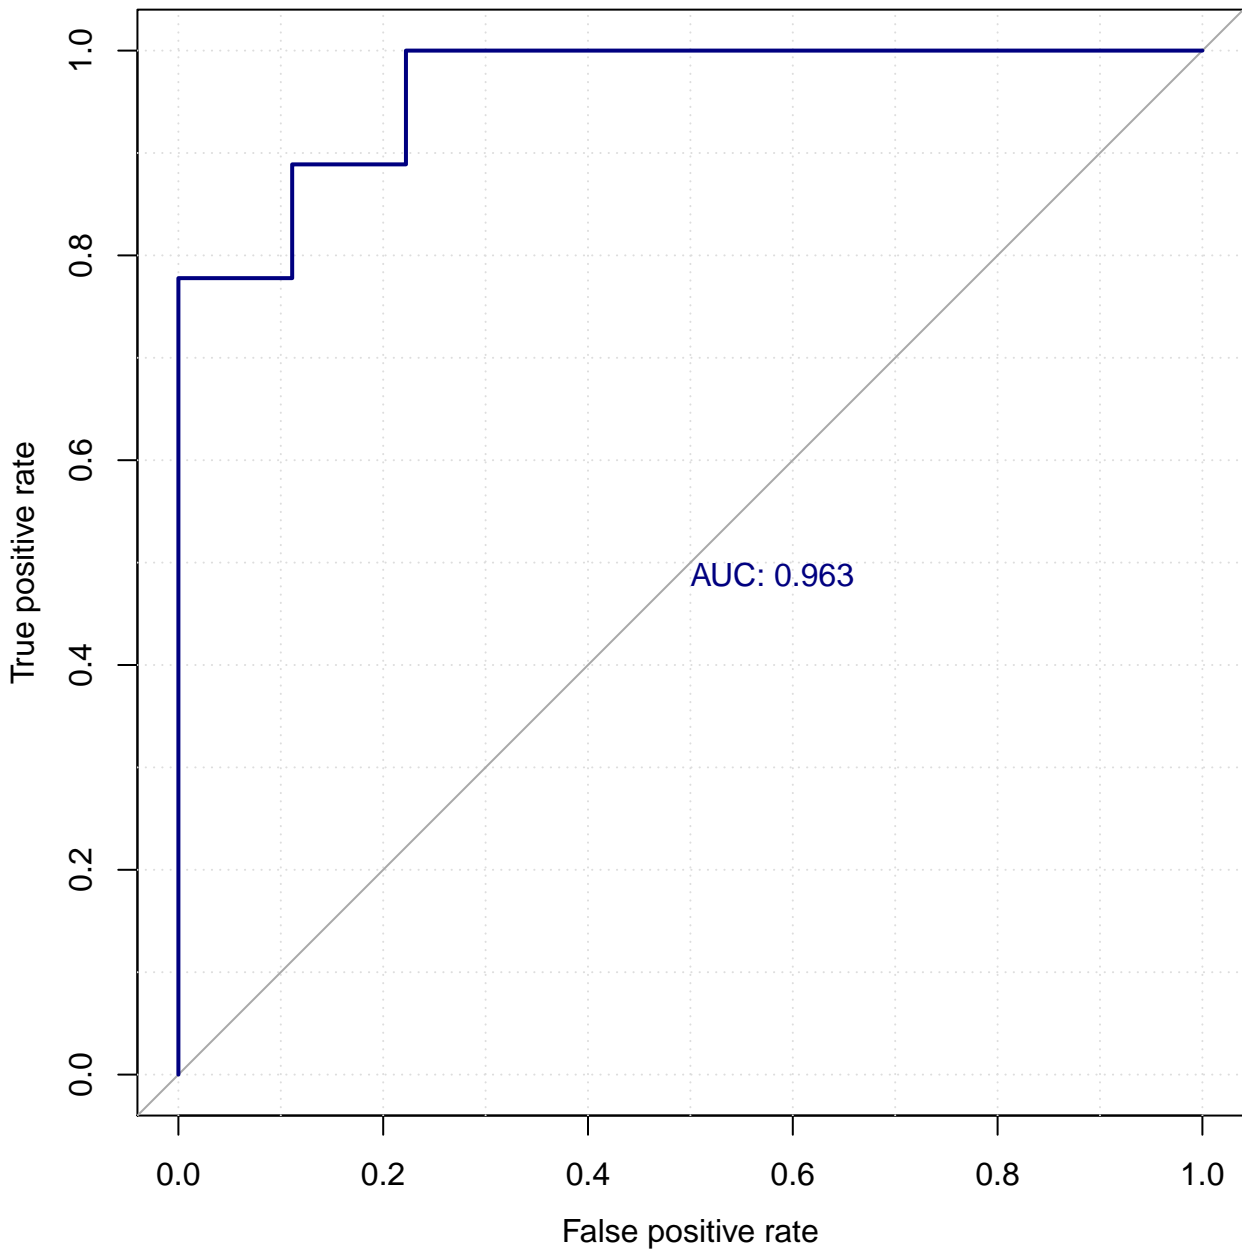

Supplement: RawDataResult.zip [file RawDataResult.zip]

# H.vs.NH

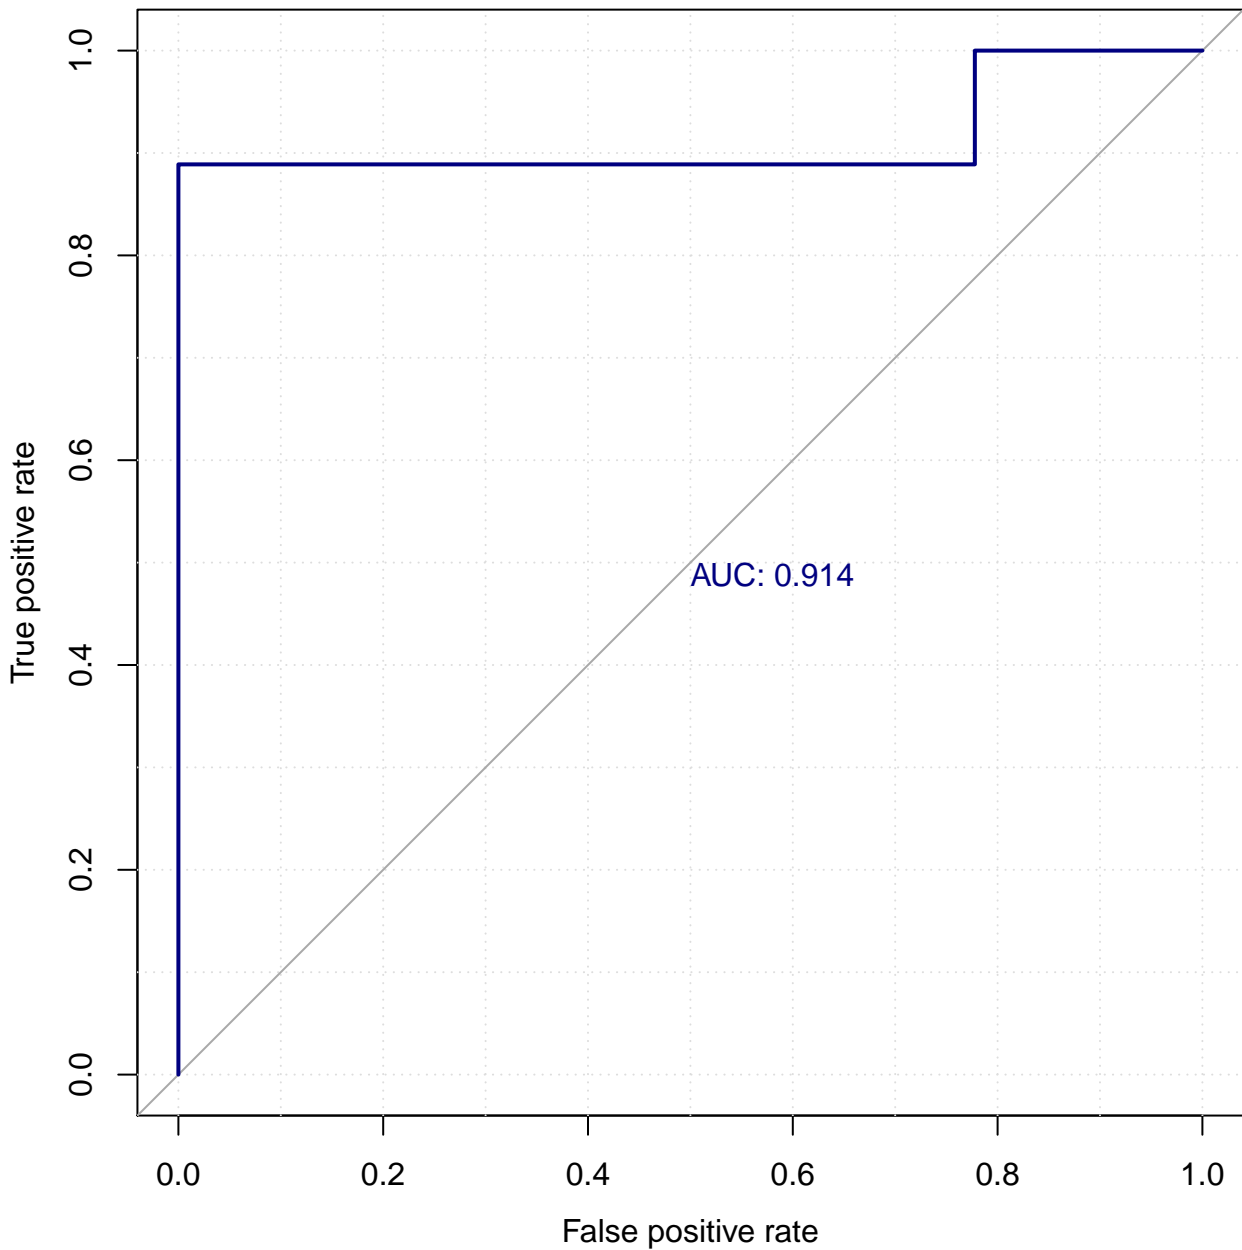

Supplement: RawDataResult.zip [file RawDataResult.zip]

# H.vs.NH

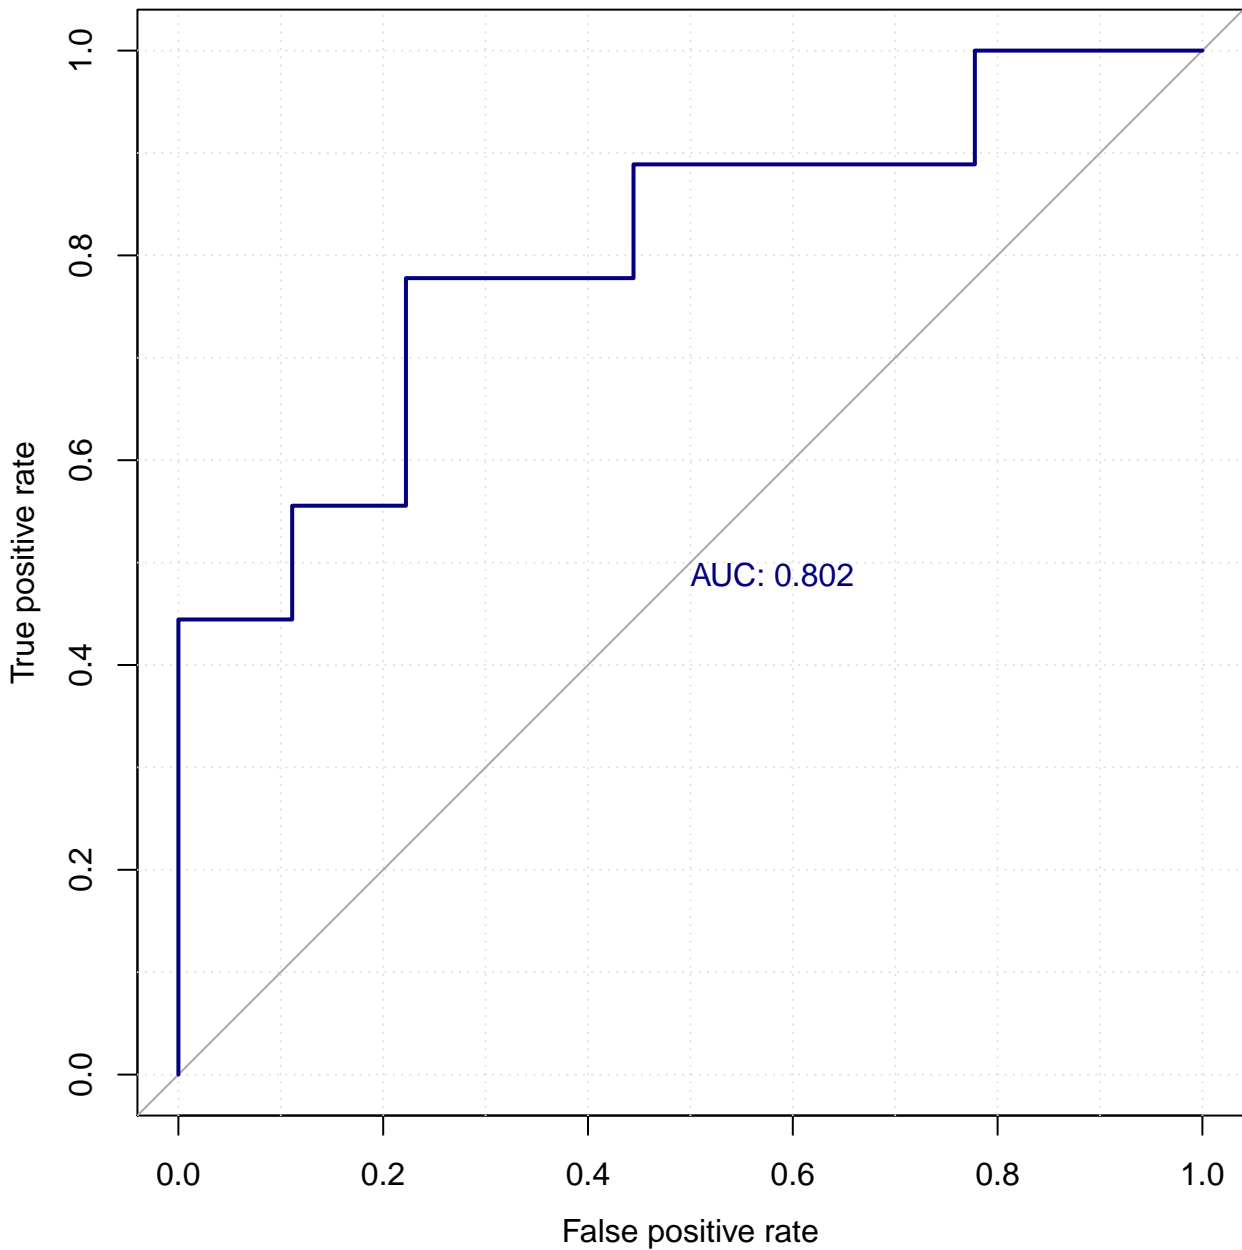

Supplement: RawDataResult.zip [file RawDataResult.zip]

H.vs.NH

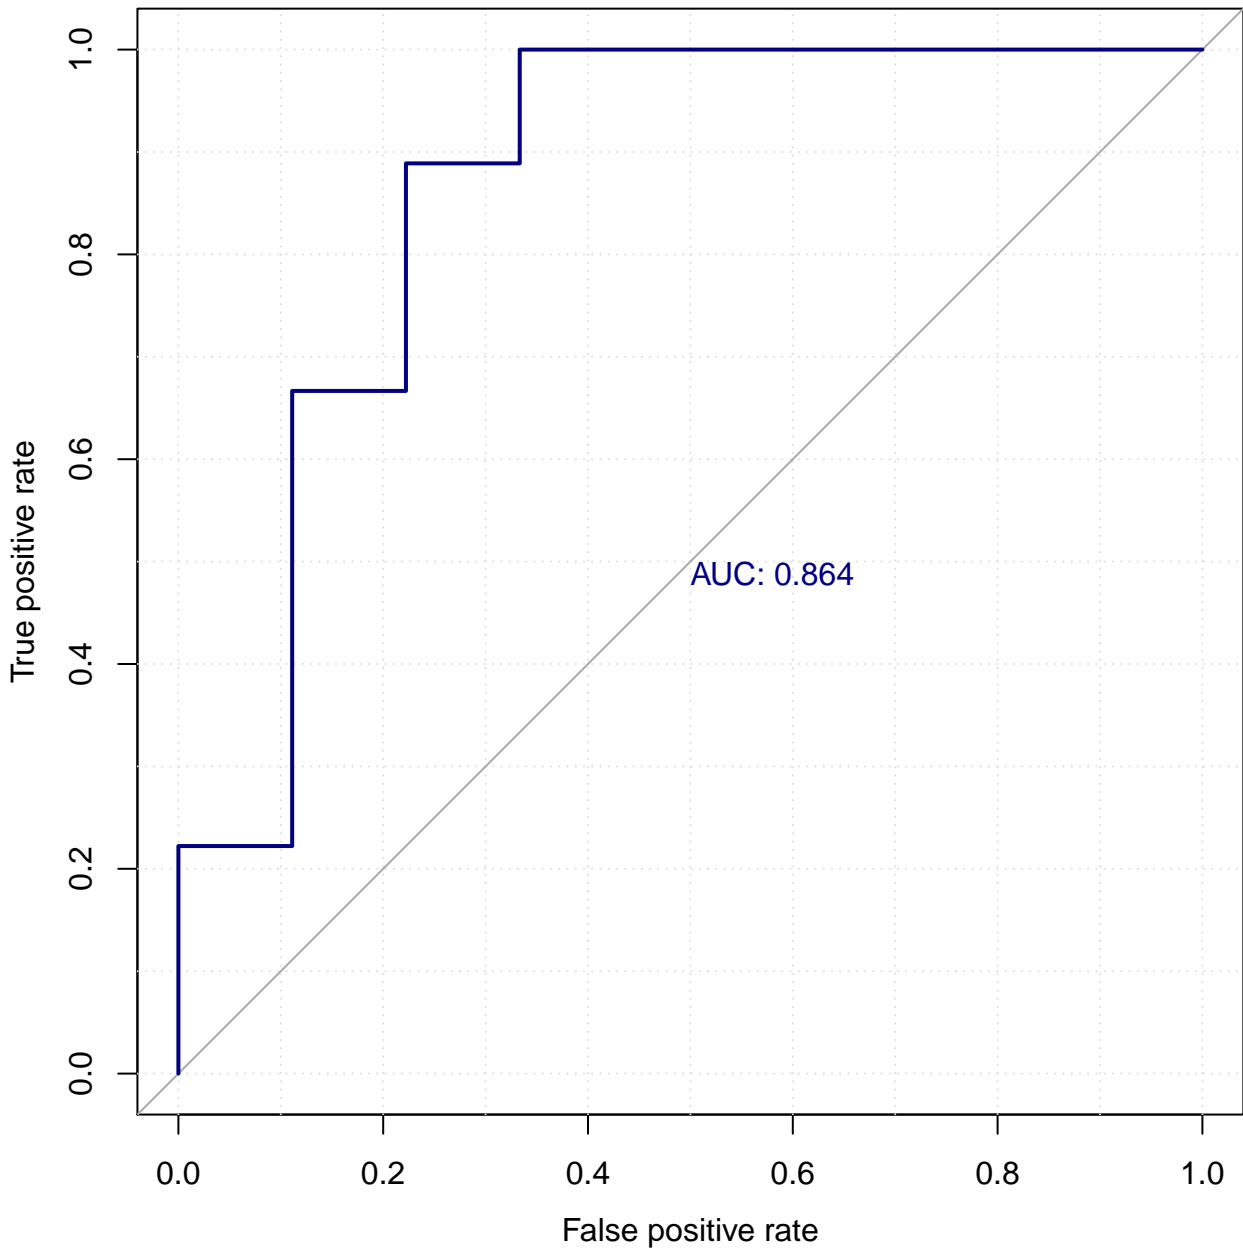

Supplement: RawDataResult.zip [file RawDataResult.zip]

H.vs.NH

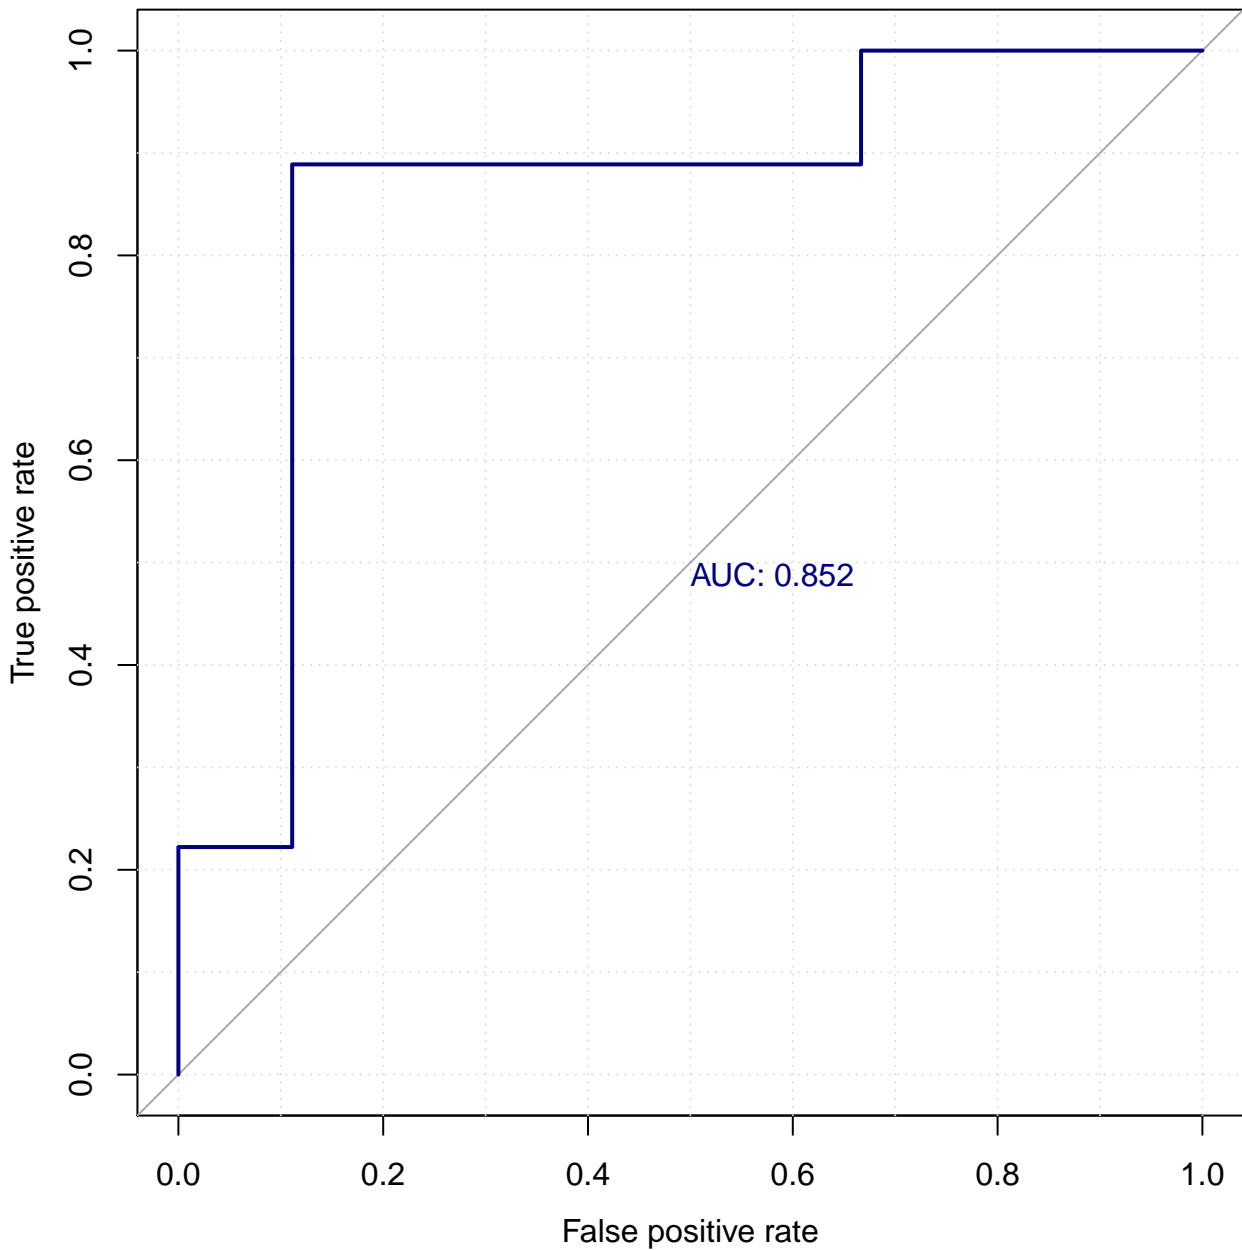

Supplement: RawDataResult.zip [file RawDataResult.zip]

H.vs.NH

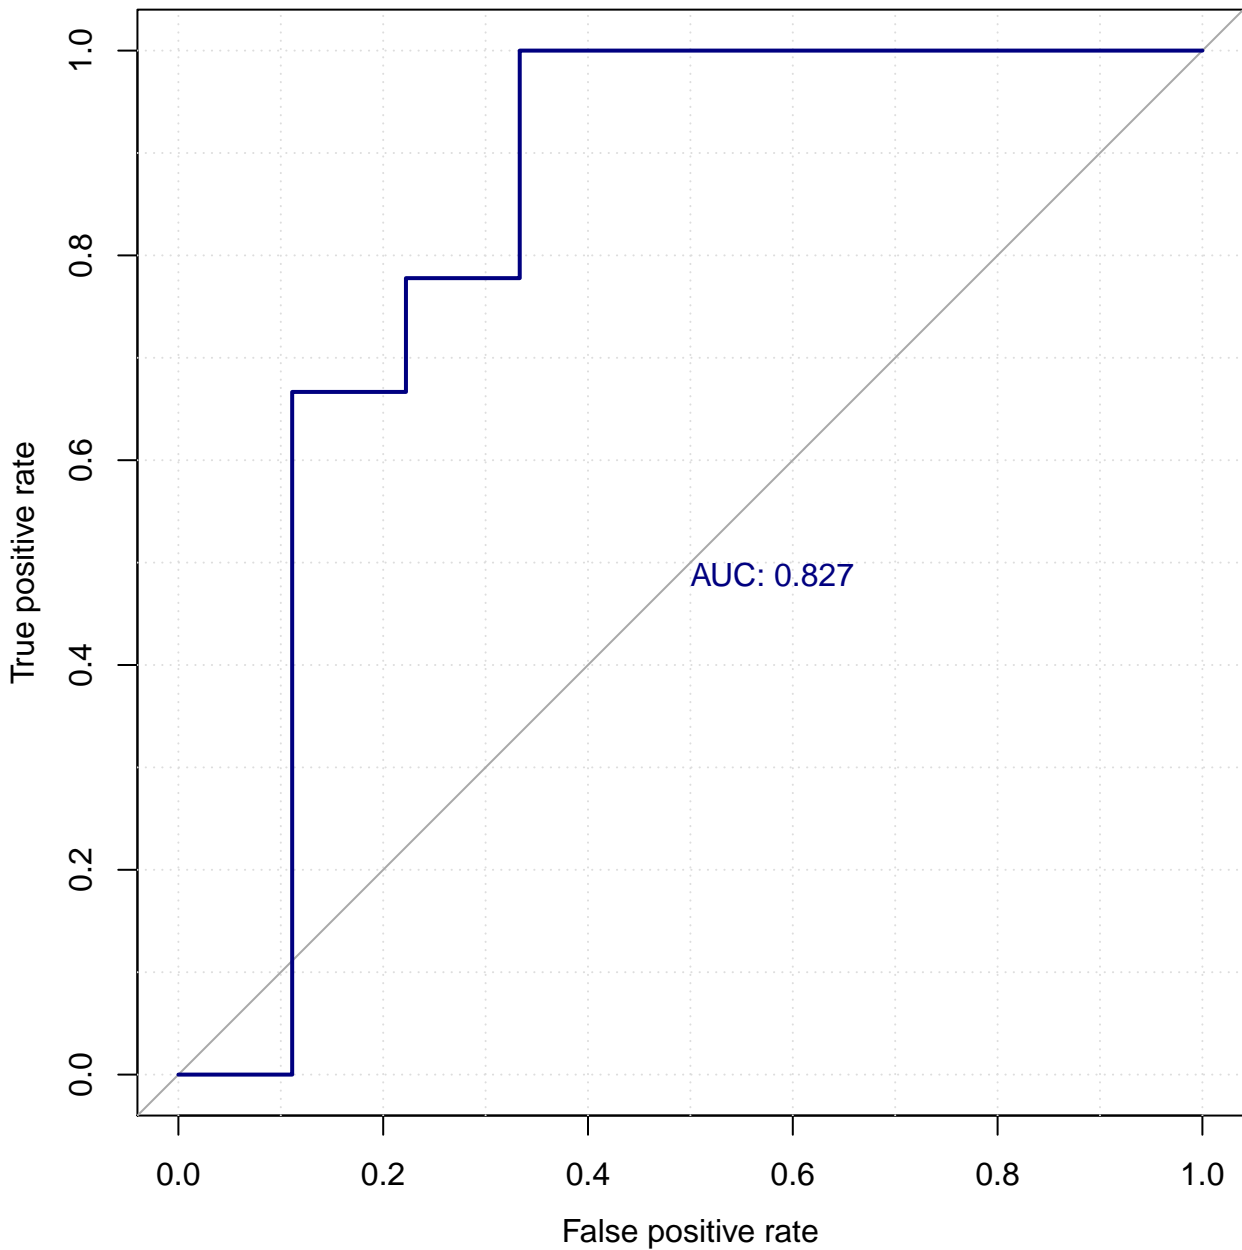

Supplement: RawDataResult.zip [file RawDataResult.zip]

# H.vs.NH



Supplement: RawDataResult.zip [file RawDataResult.zip]

# H.vs.NH

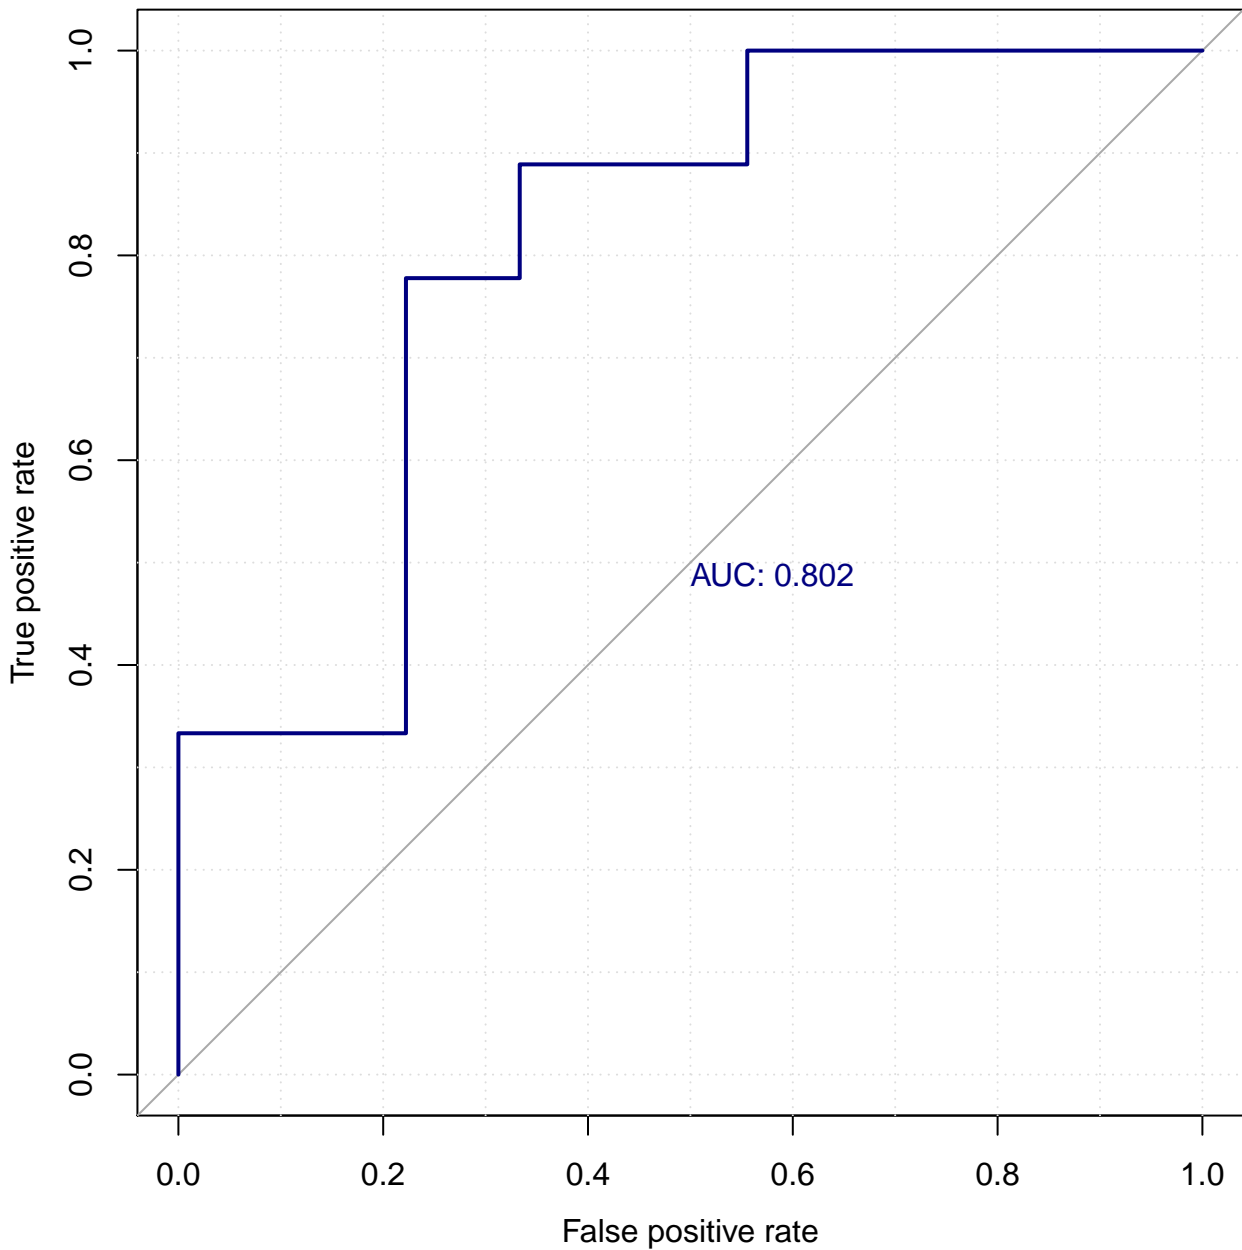

Supplement: RawDataResult.zip [file RawDataResult.zip]

H.vs.NH

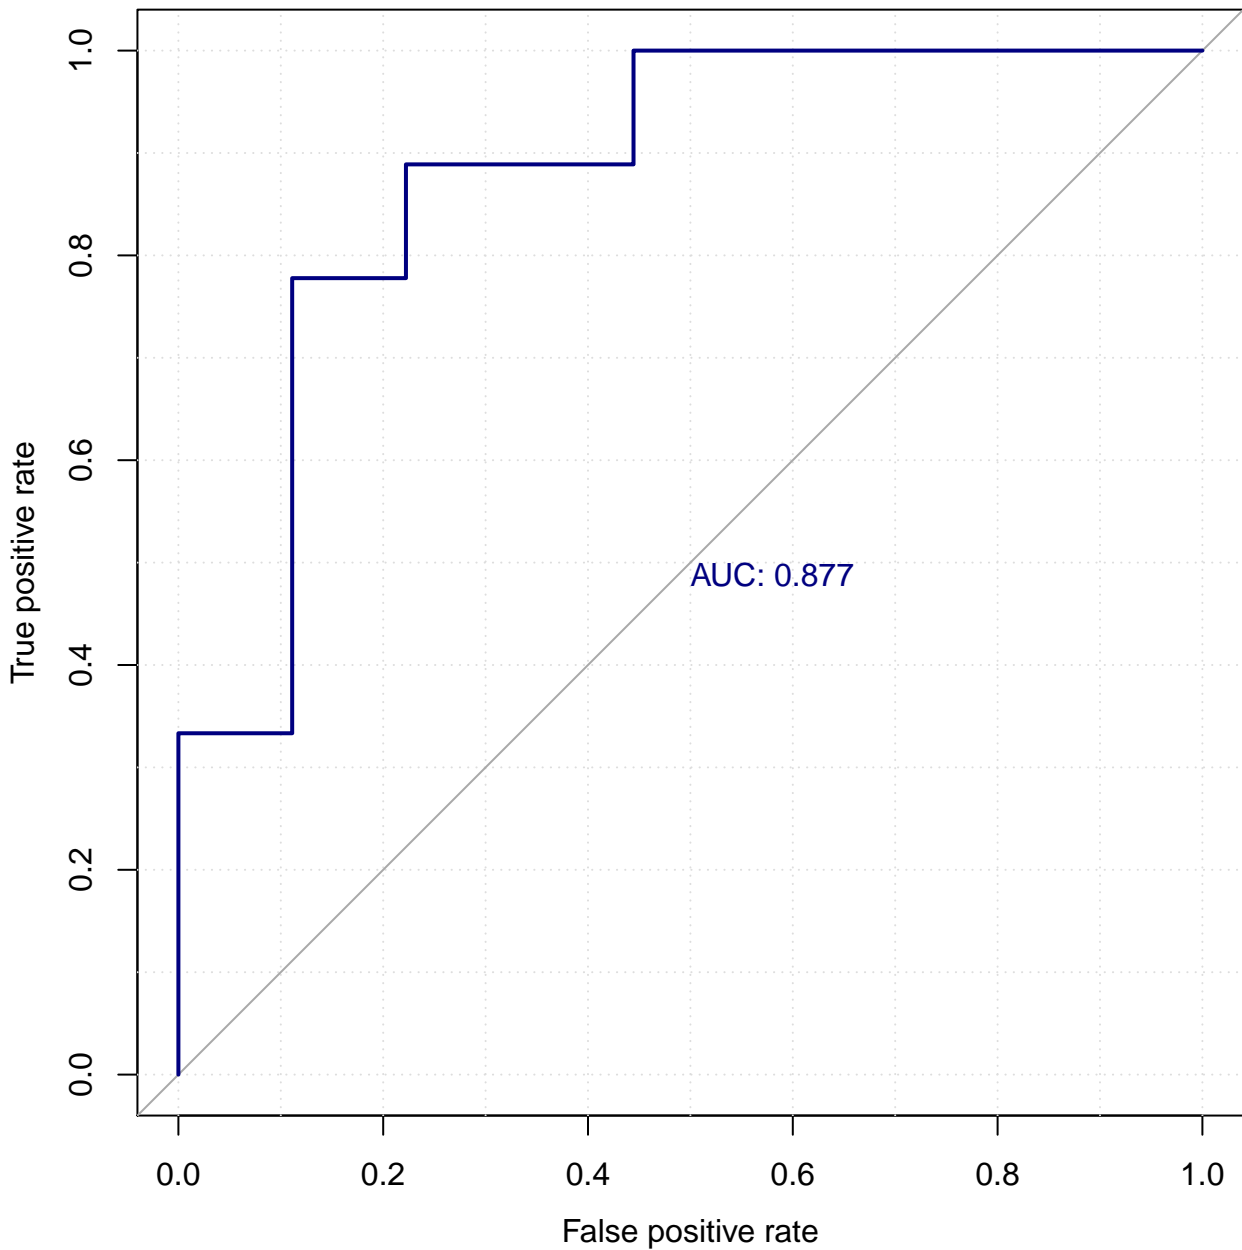

Supplement: RawDataResult.zip [file RawDataResult.zip]

H.vs.NH

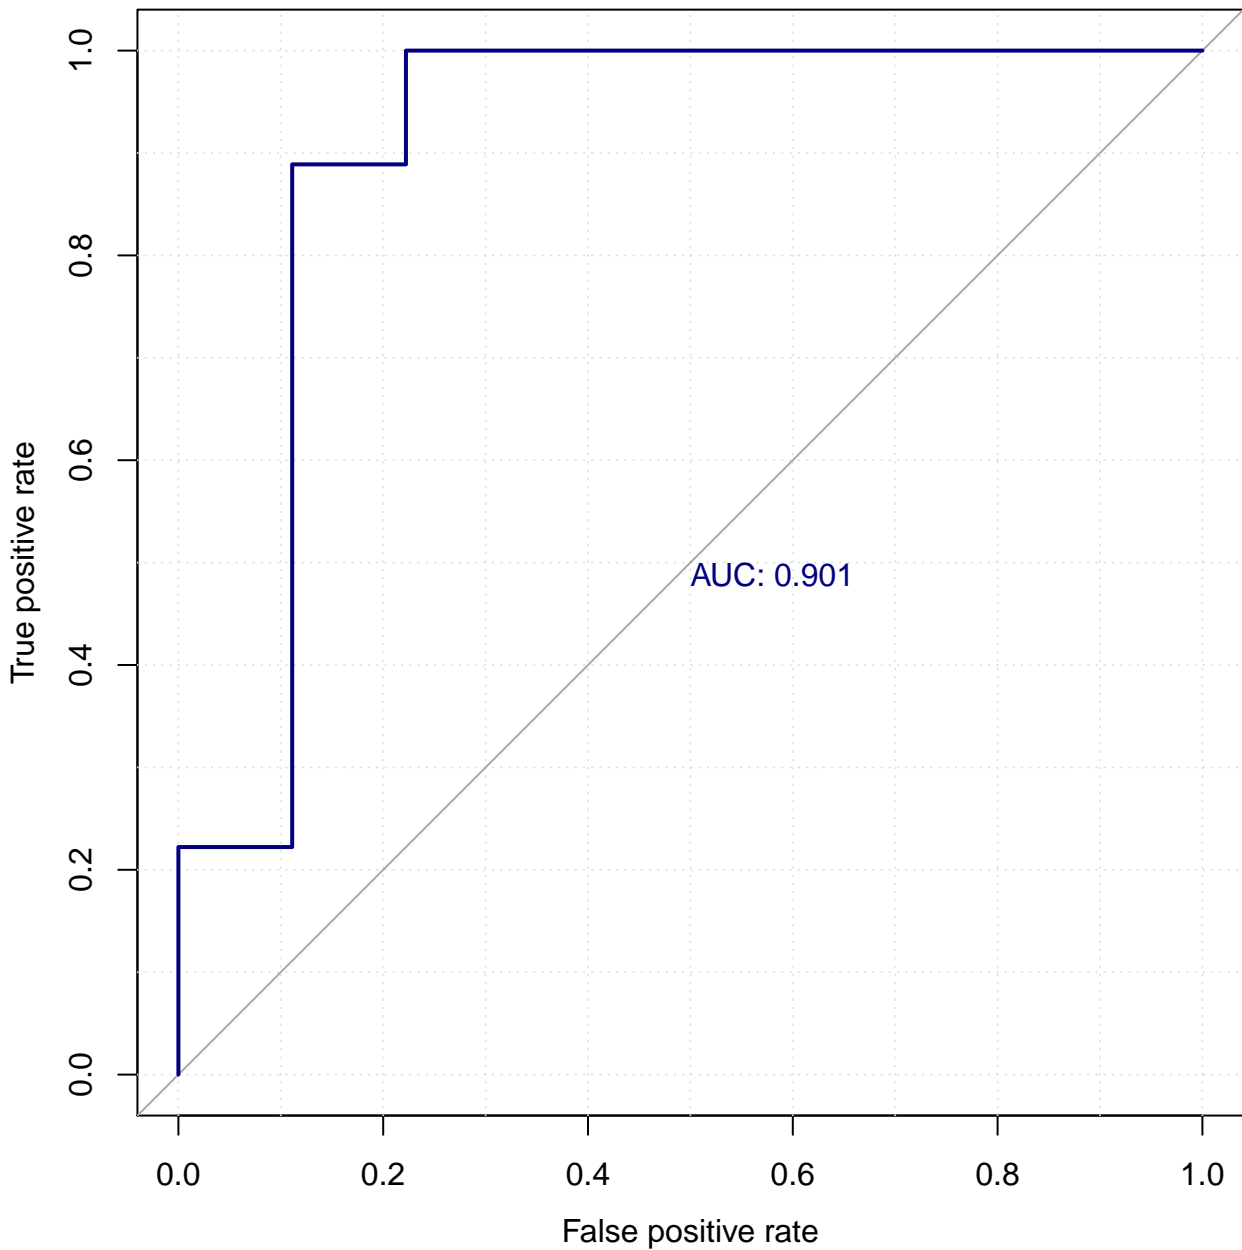

Supplement: RawDataResult.zip [file RawDataResult.zip]



Supplement: RawDataResult.zip [file RawDataResult.zip]

# H.vs.NH

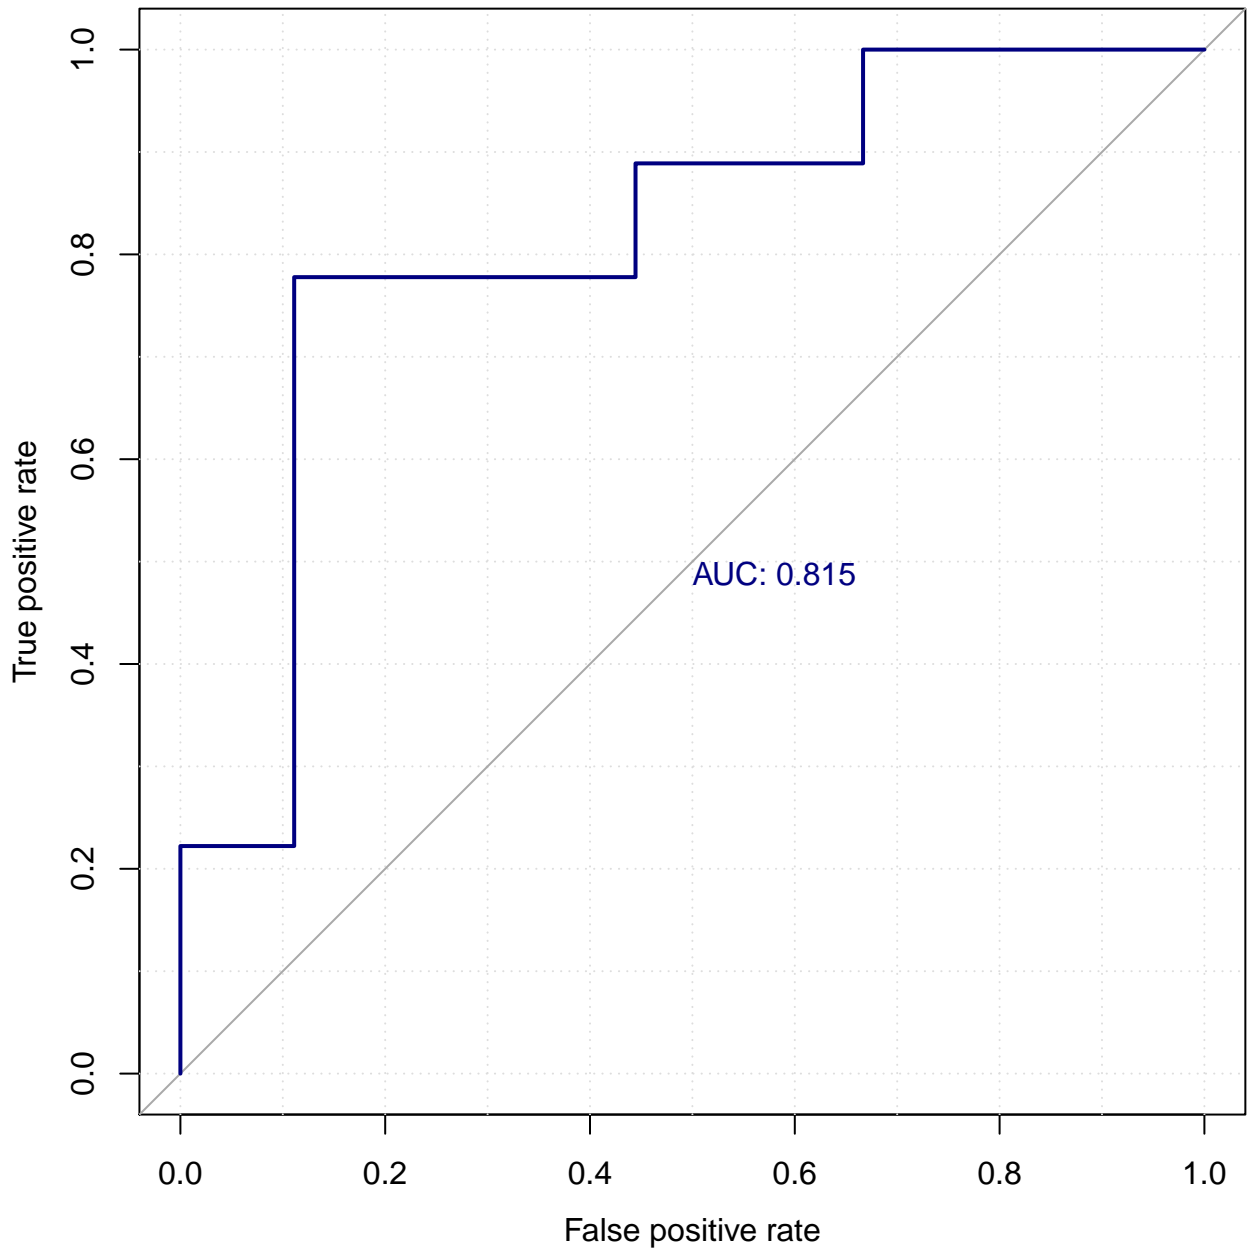

Supplement: RawDataResult.zip [file RawDataResult.zip]

H.vs.NH

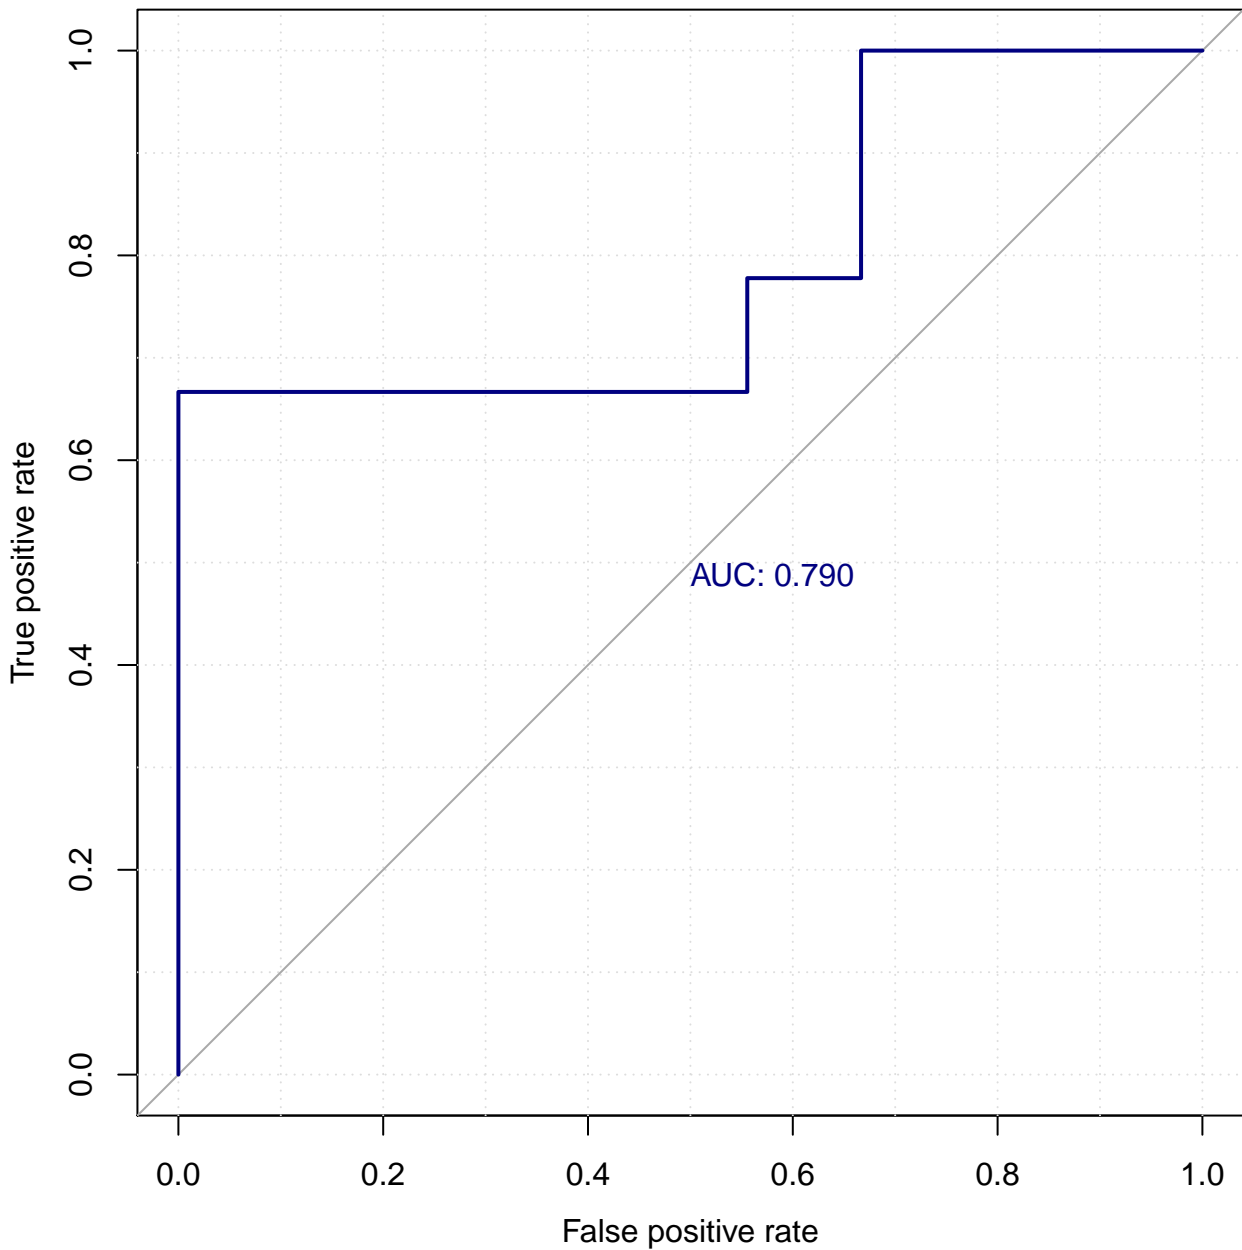

Supplement: RawDataResult.zip [file RawDataResult.zip]

H.vs.NH

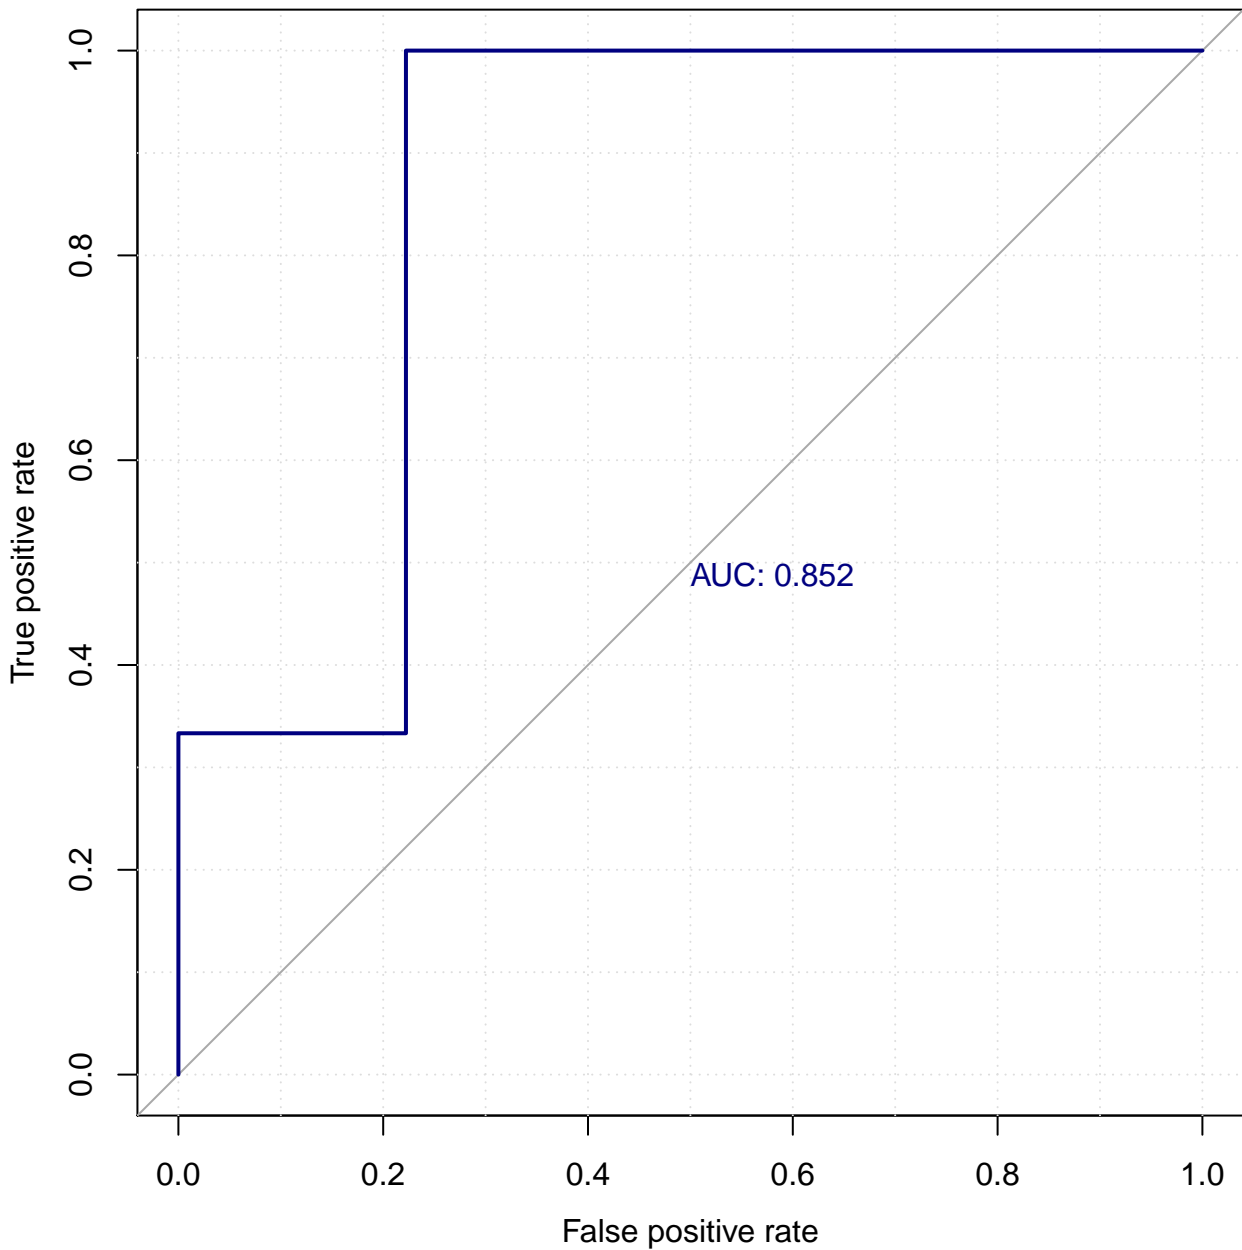

Supplement: RawDataResult.zip [file RawDataResult.zip]

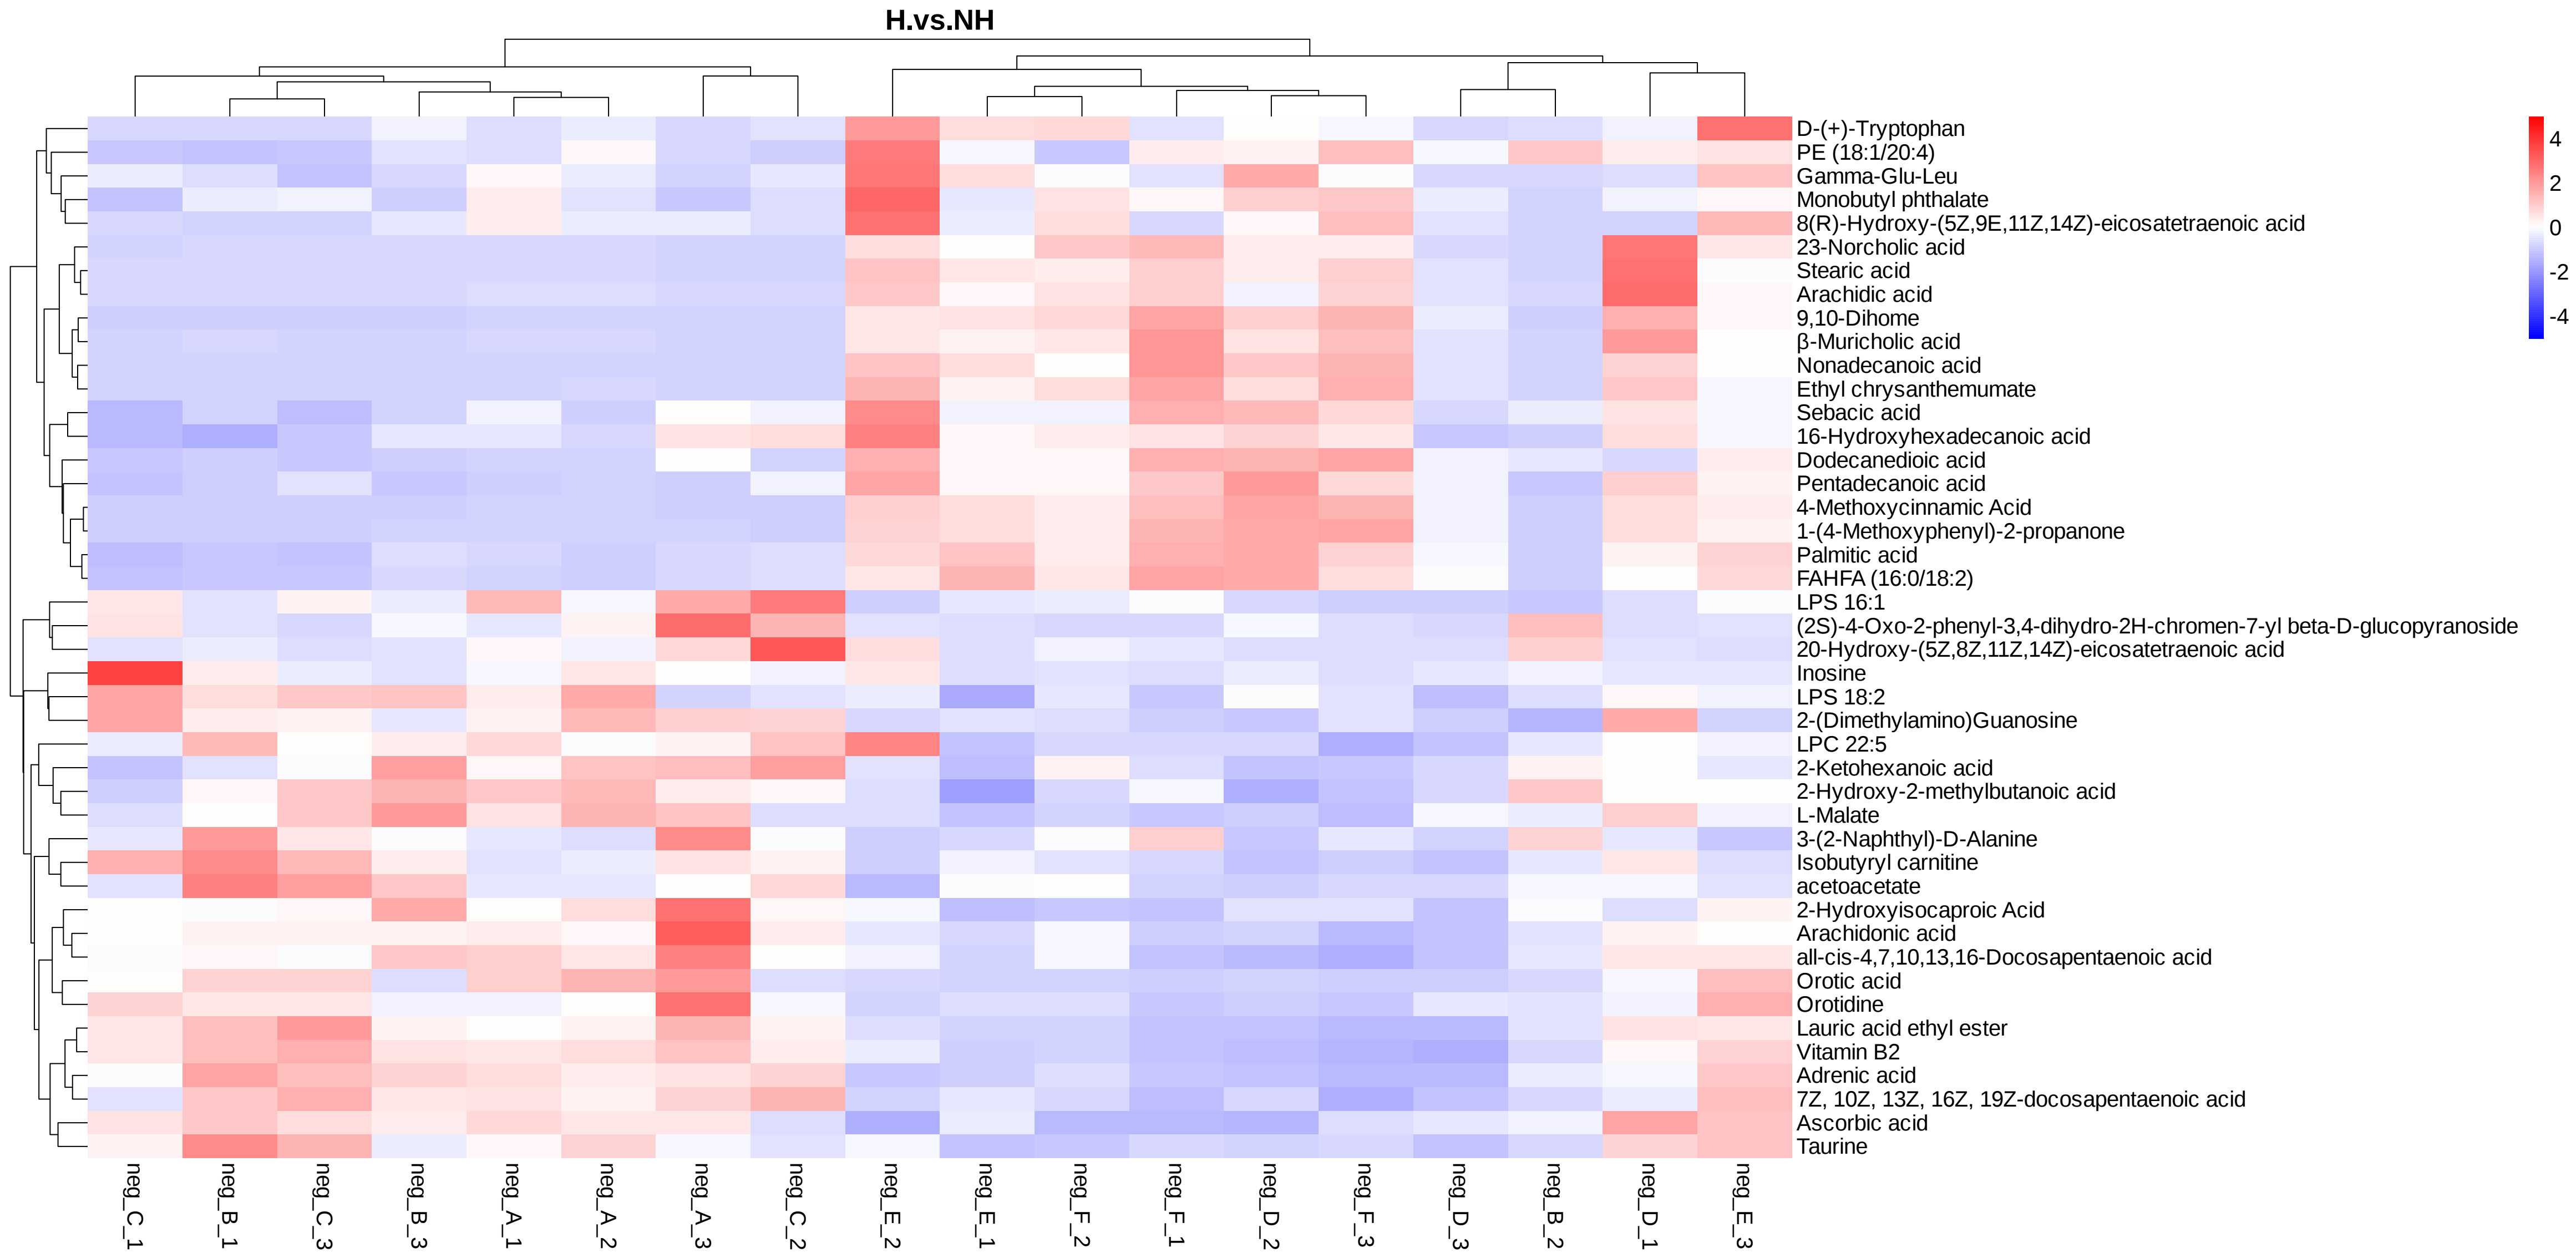

Supplement: RawDataResult.zip [file RawDataResult.zip]

H.vs.NH

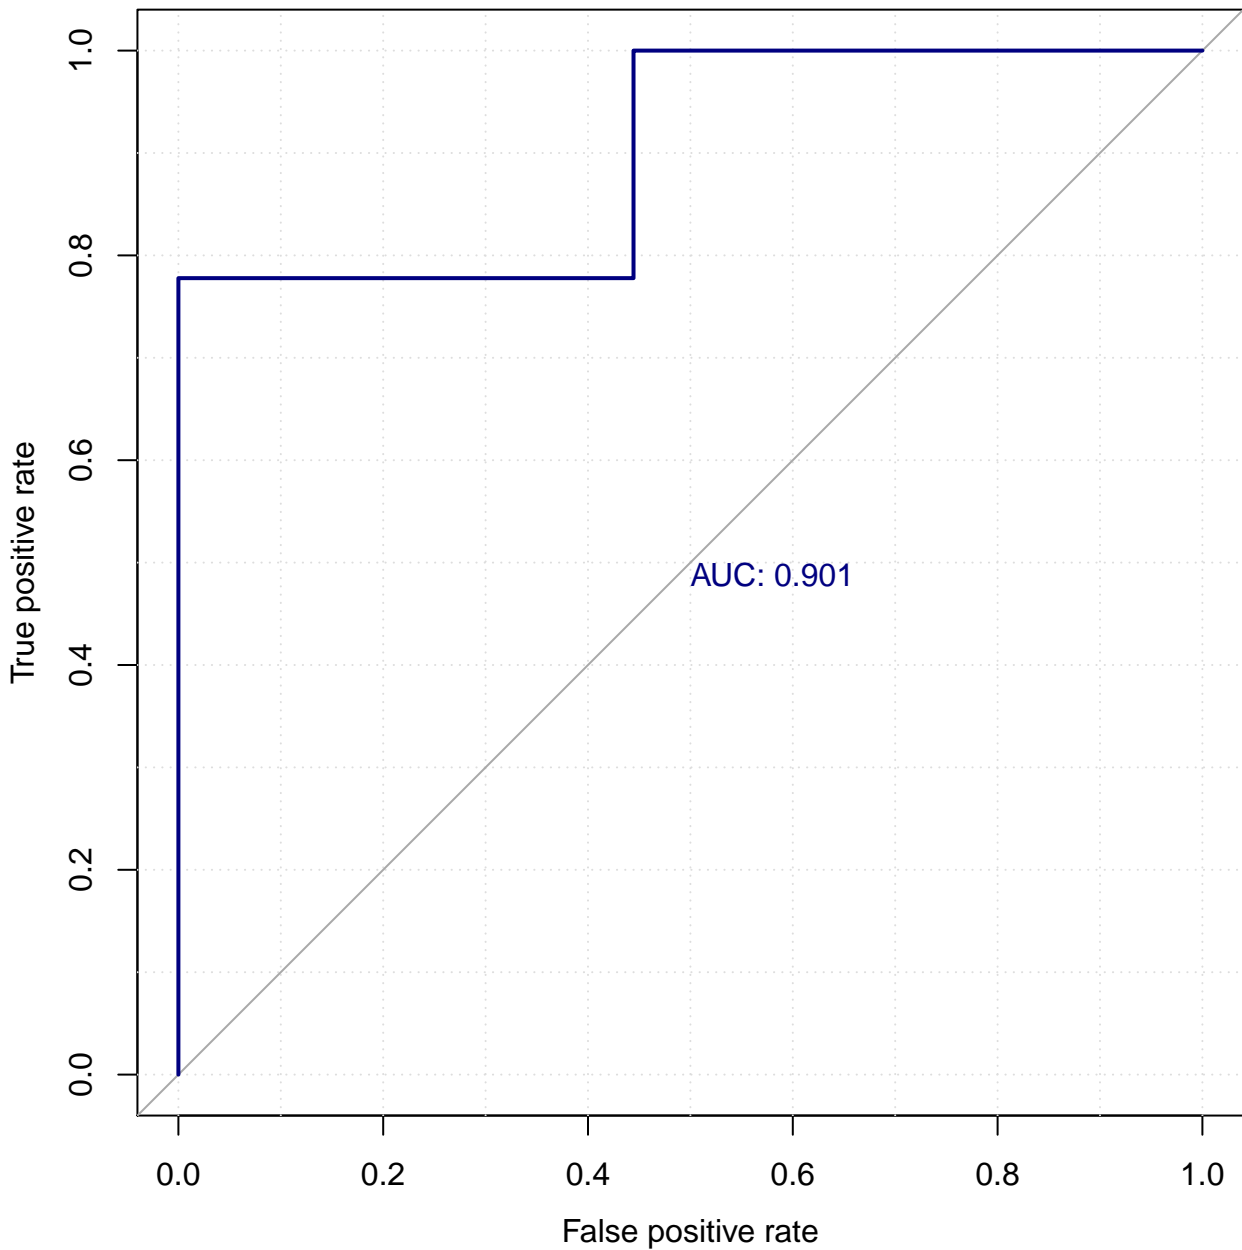

Supplement: RawDataResult.zip [file RawDataResult.zip]

# H.vs.NH

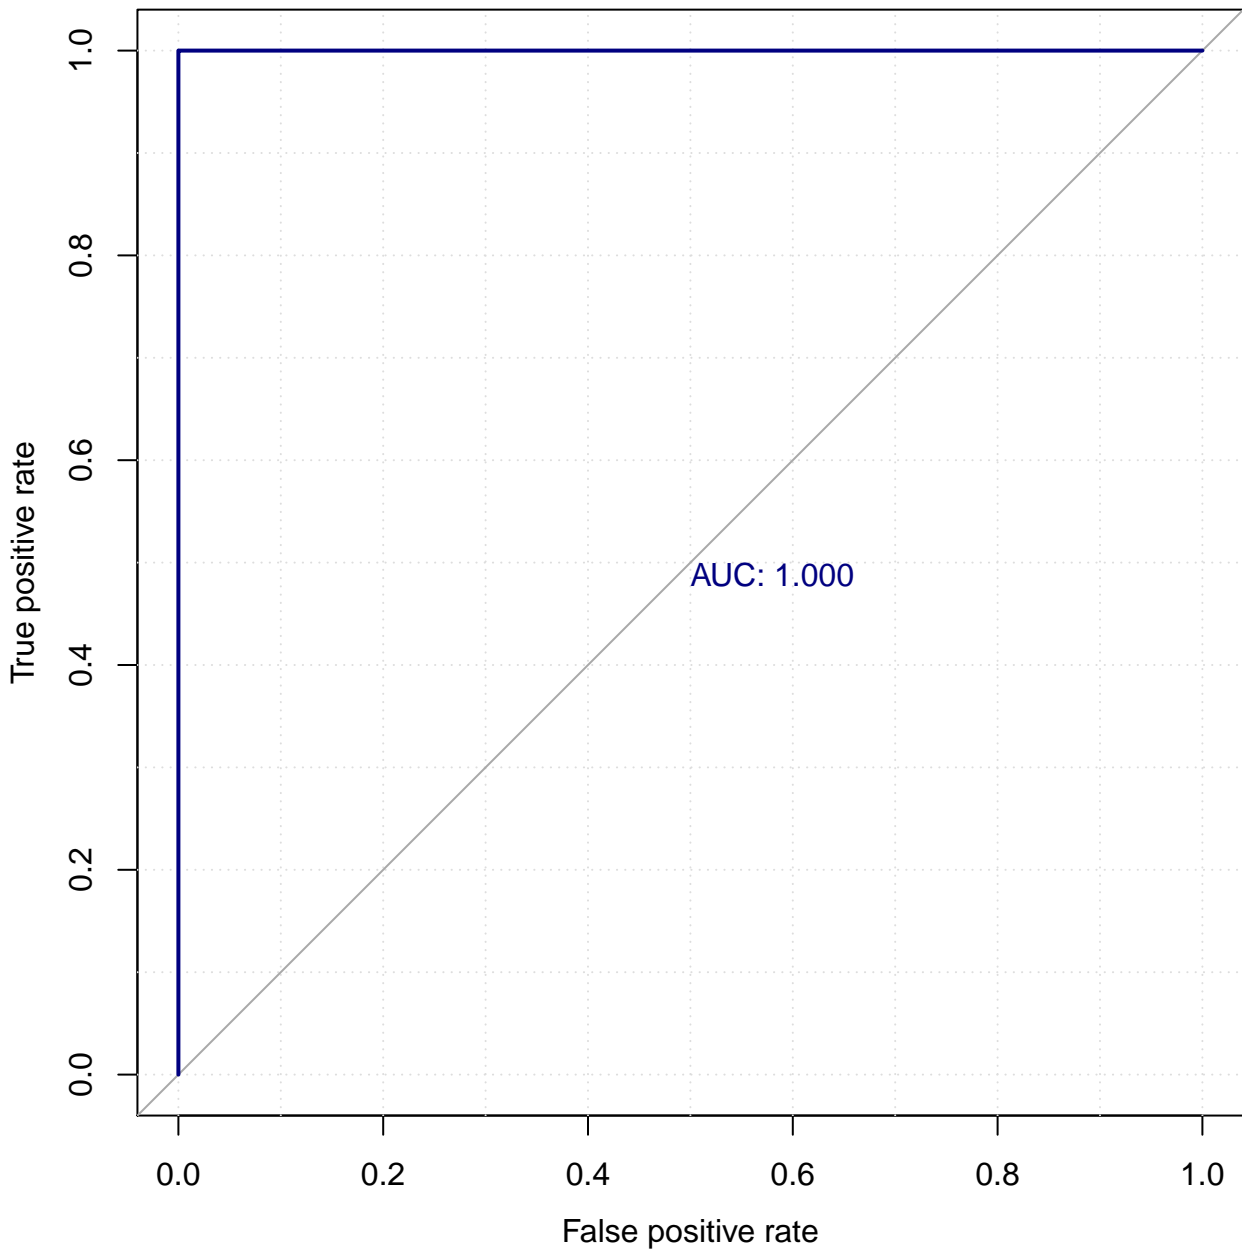

Supplement: RawDataResult.zip [file RawDataResult.zip]

H.vs.NH

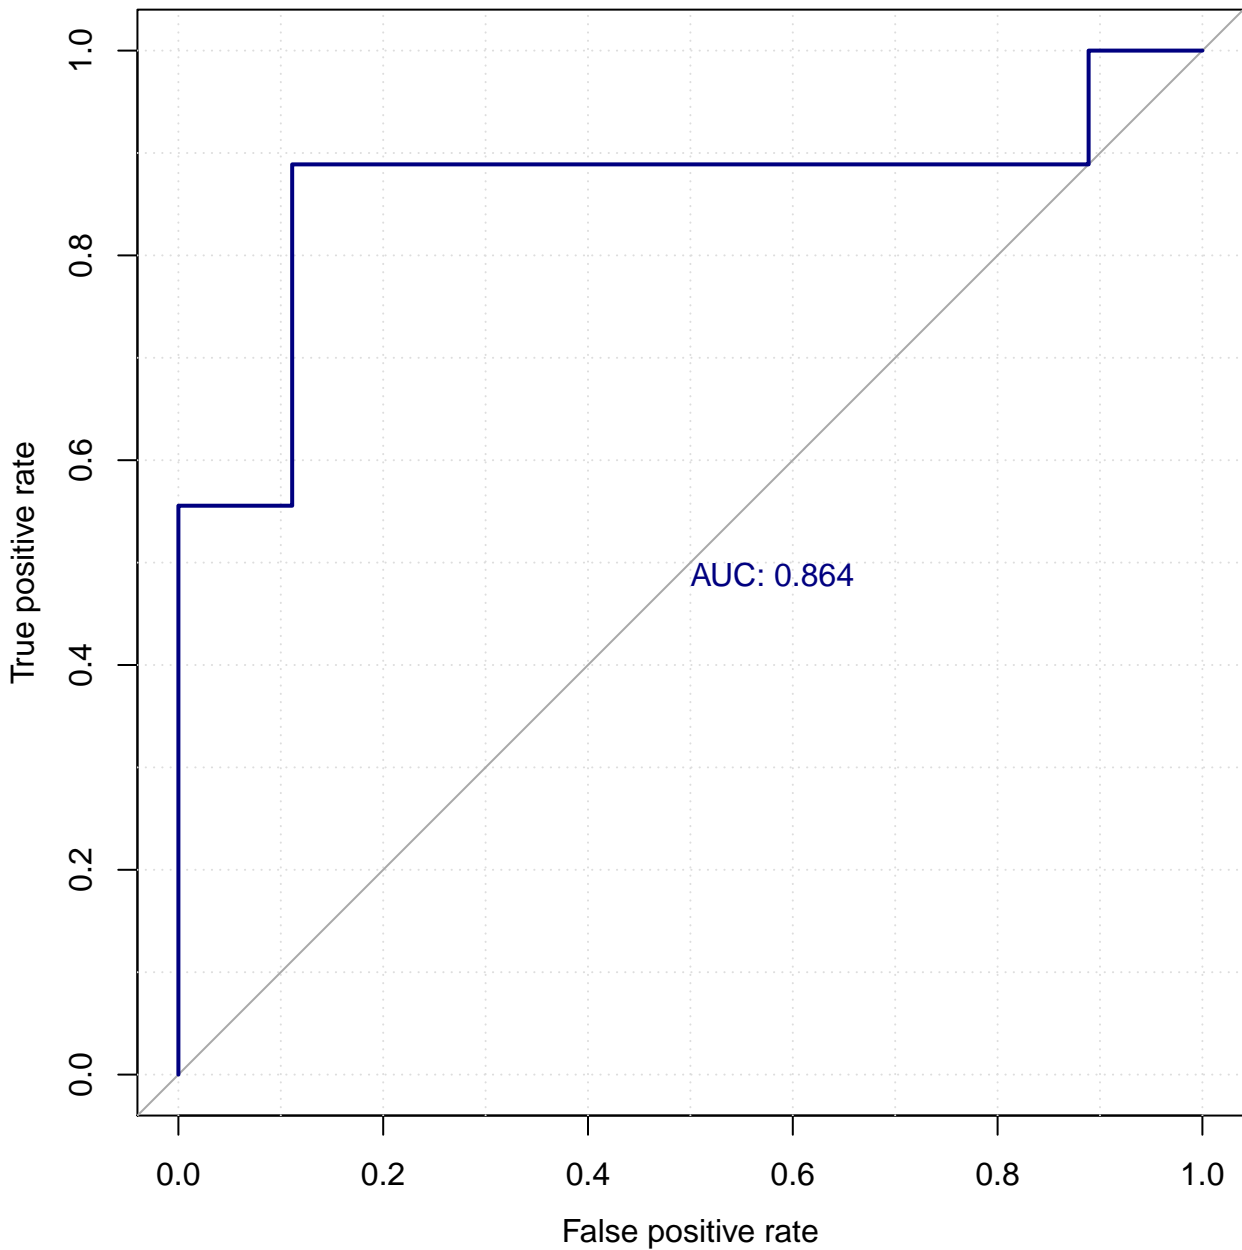

Supplement: RawDataResult.zip [file RawDataResult.zip]

# H.vs.NH

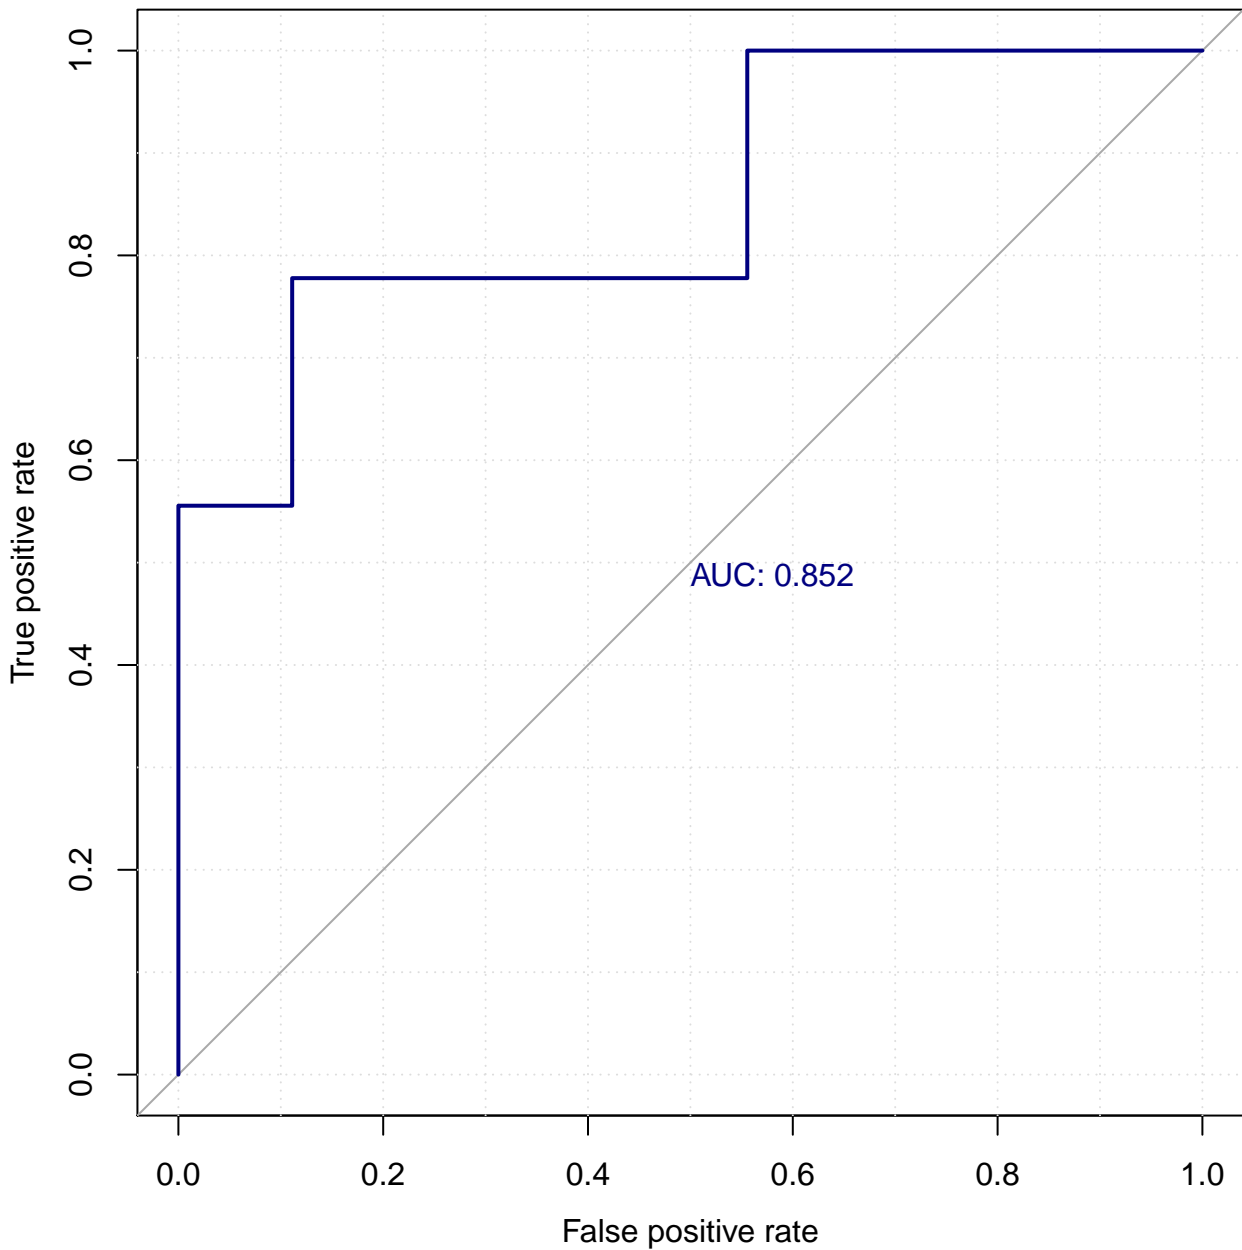

Supplement: RawDataResult.zip [file RawDataResult.zip]

H.vs.NH

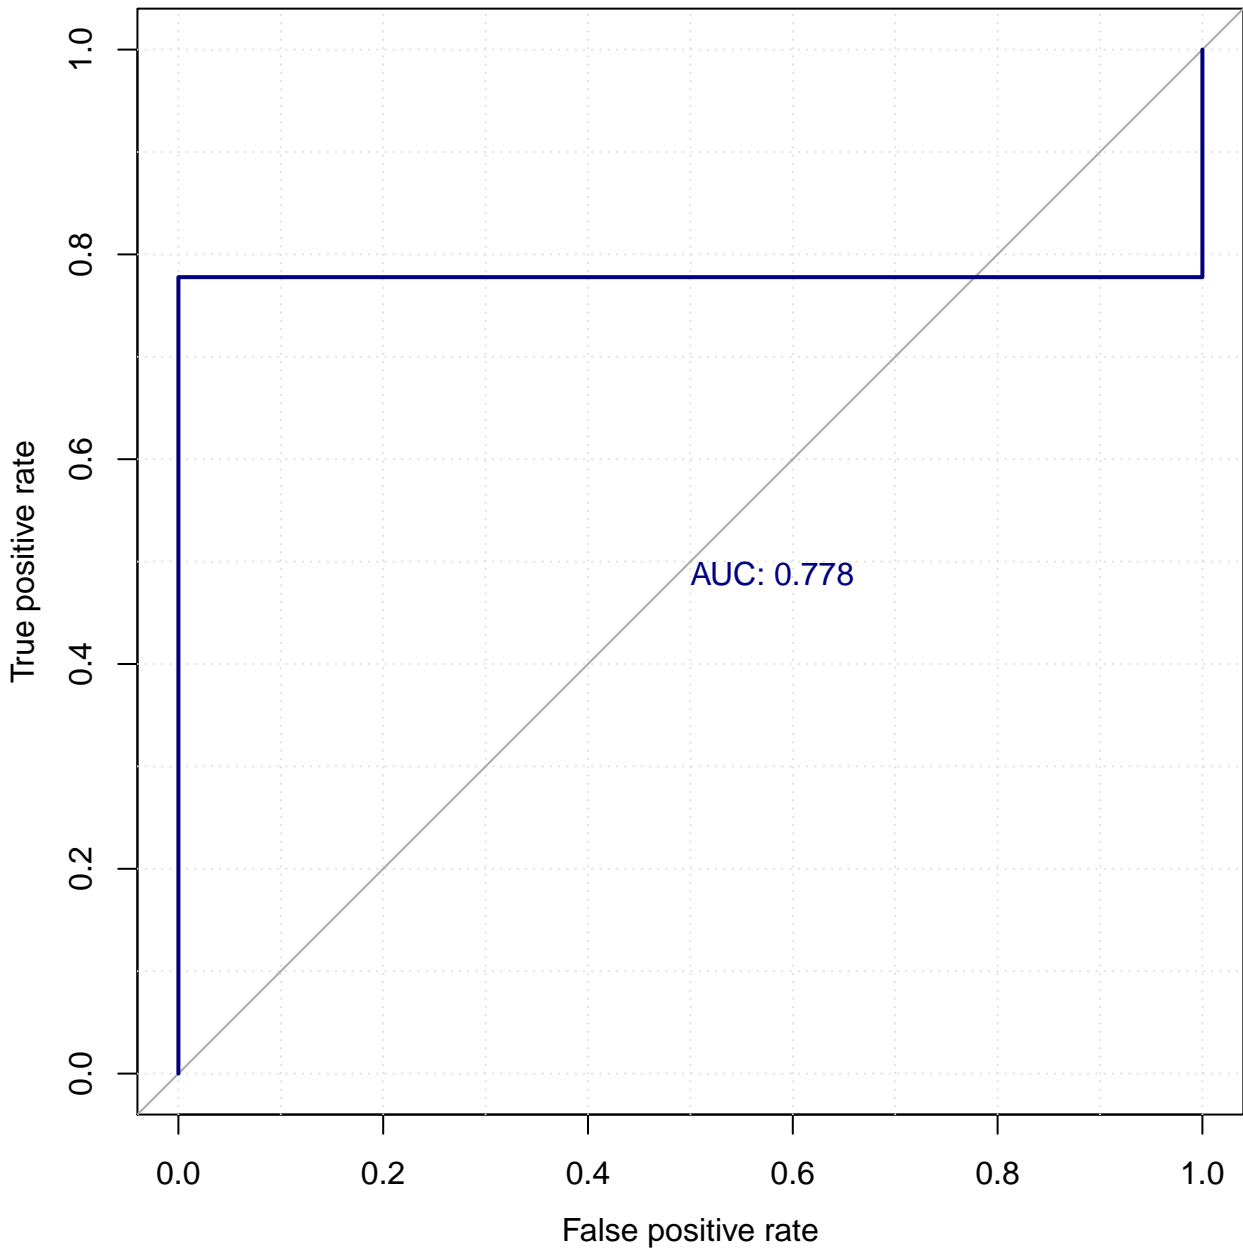

Supplement: RawDataResult.zip [file RawDataResult.zip]

# H.vs.NH

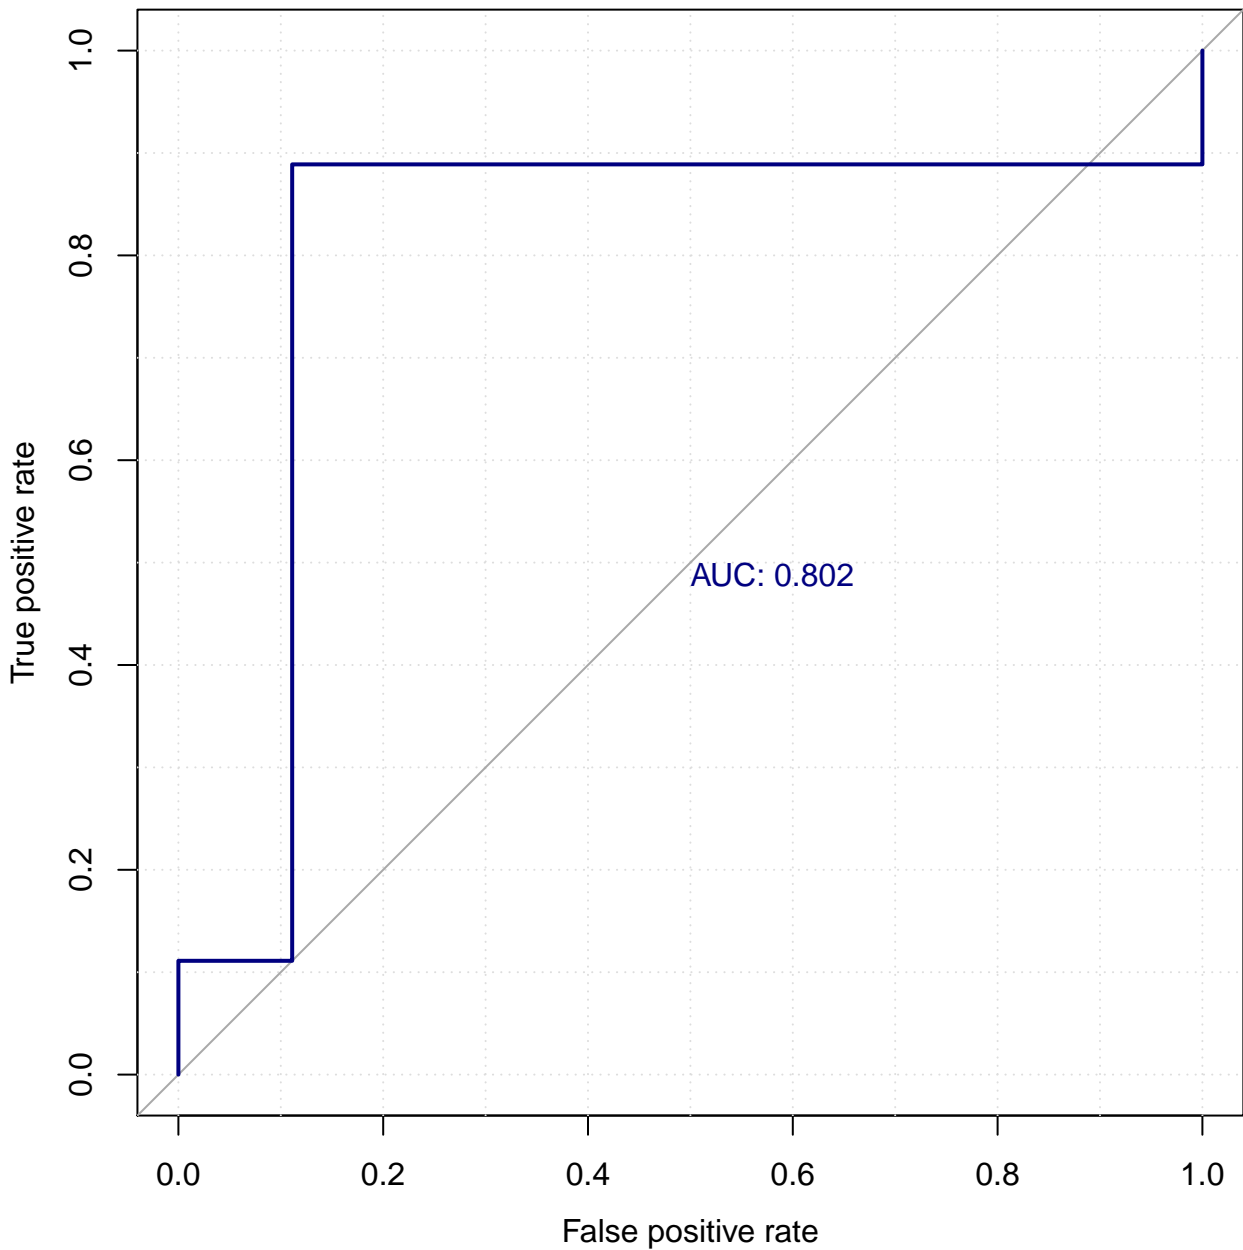

Supplement: RawDataResult.zip [file RawDataResult.zip]

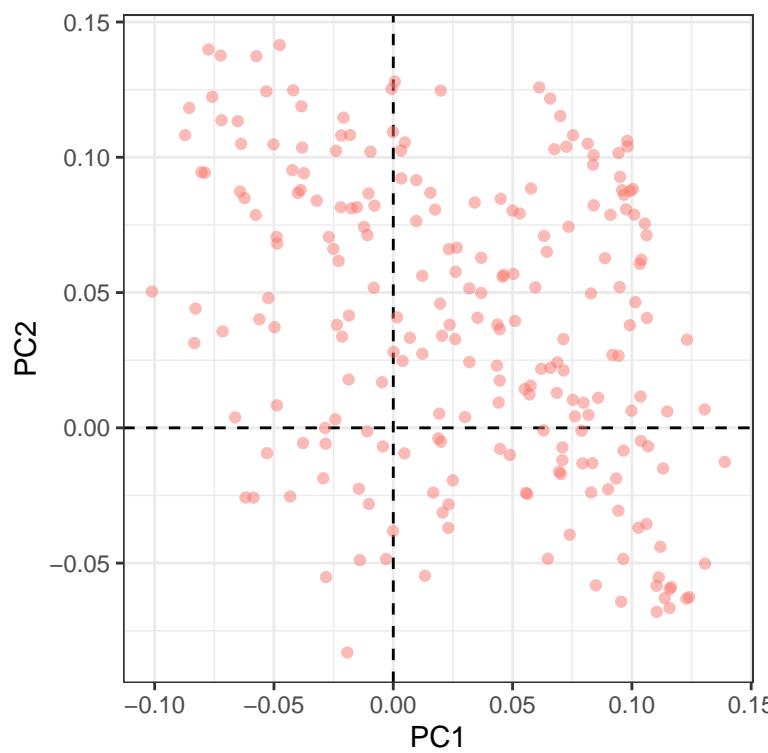

Supplement: RawDataResult.zip [file RawDataResult.zip]
