# Supplementary figures and images for: Semen quality and seminal plasma metabolites in male rabbits (Oryctolagus Cuniculus) under heat stress (part 2 of 2)
Source: PeerJ journal article supplement (doi:10.7717/peerj.15112), 2023-04-07

# H.vs.NH

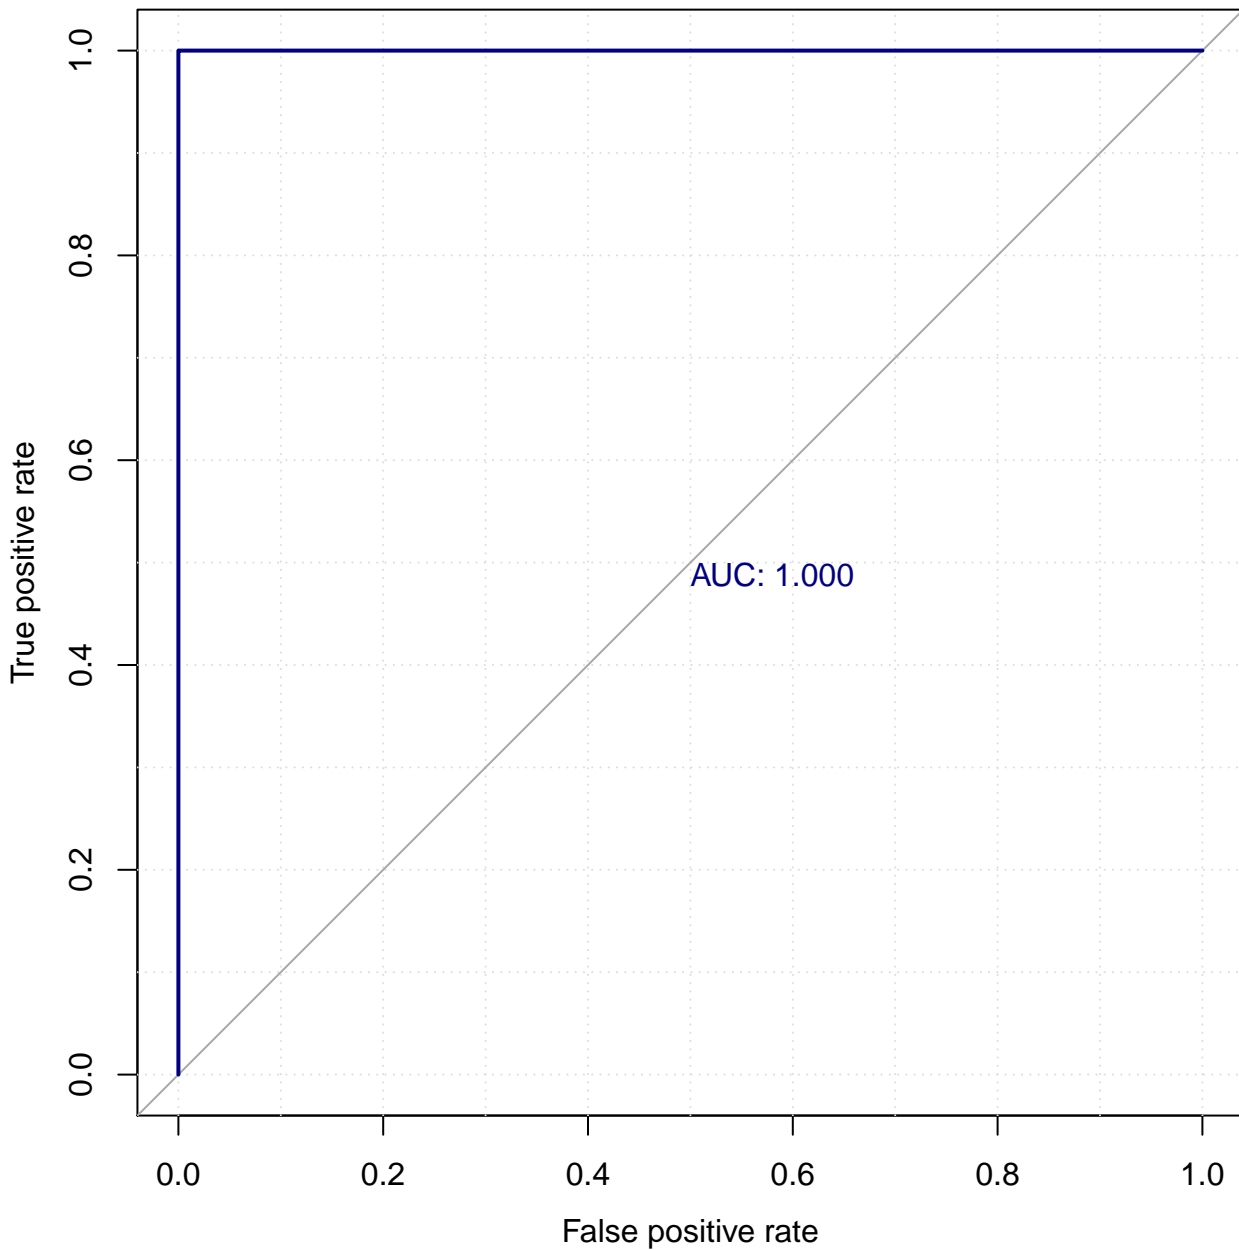

Supplement: RawDataResult.zip [file RawDataResult.zip]

# H.vs.NH

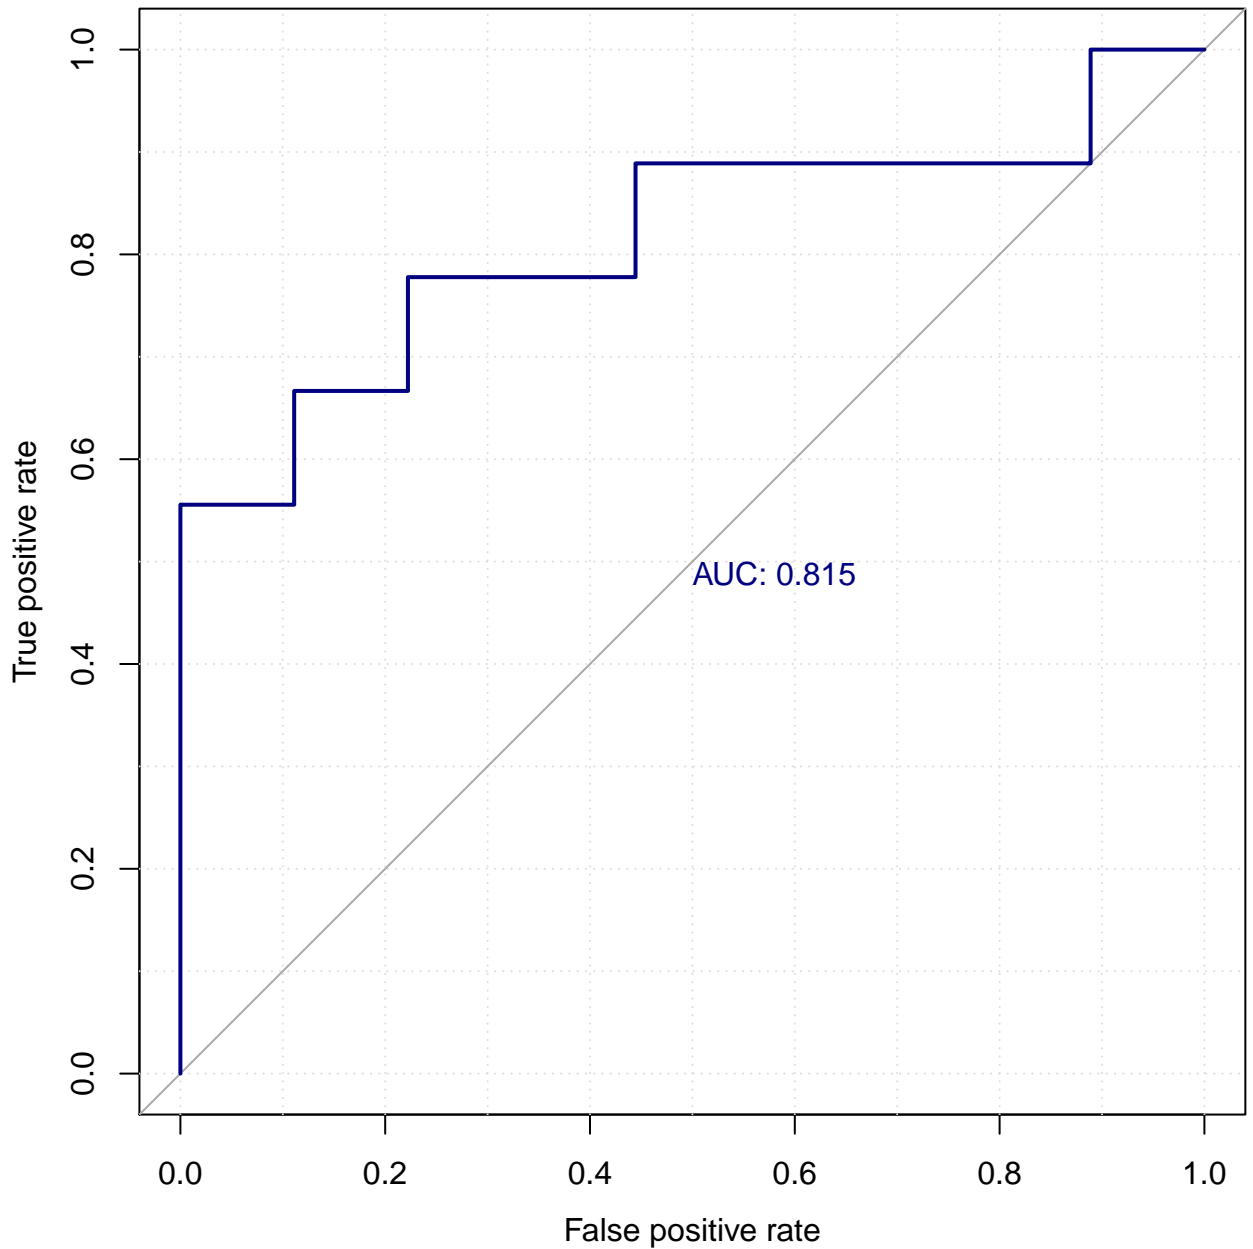

Supplement: RawDataResult.zip [file RawDataResult.zip]

# H.vs.NH

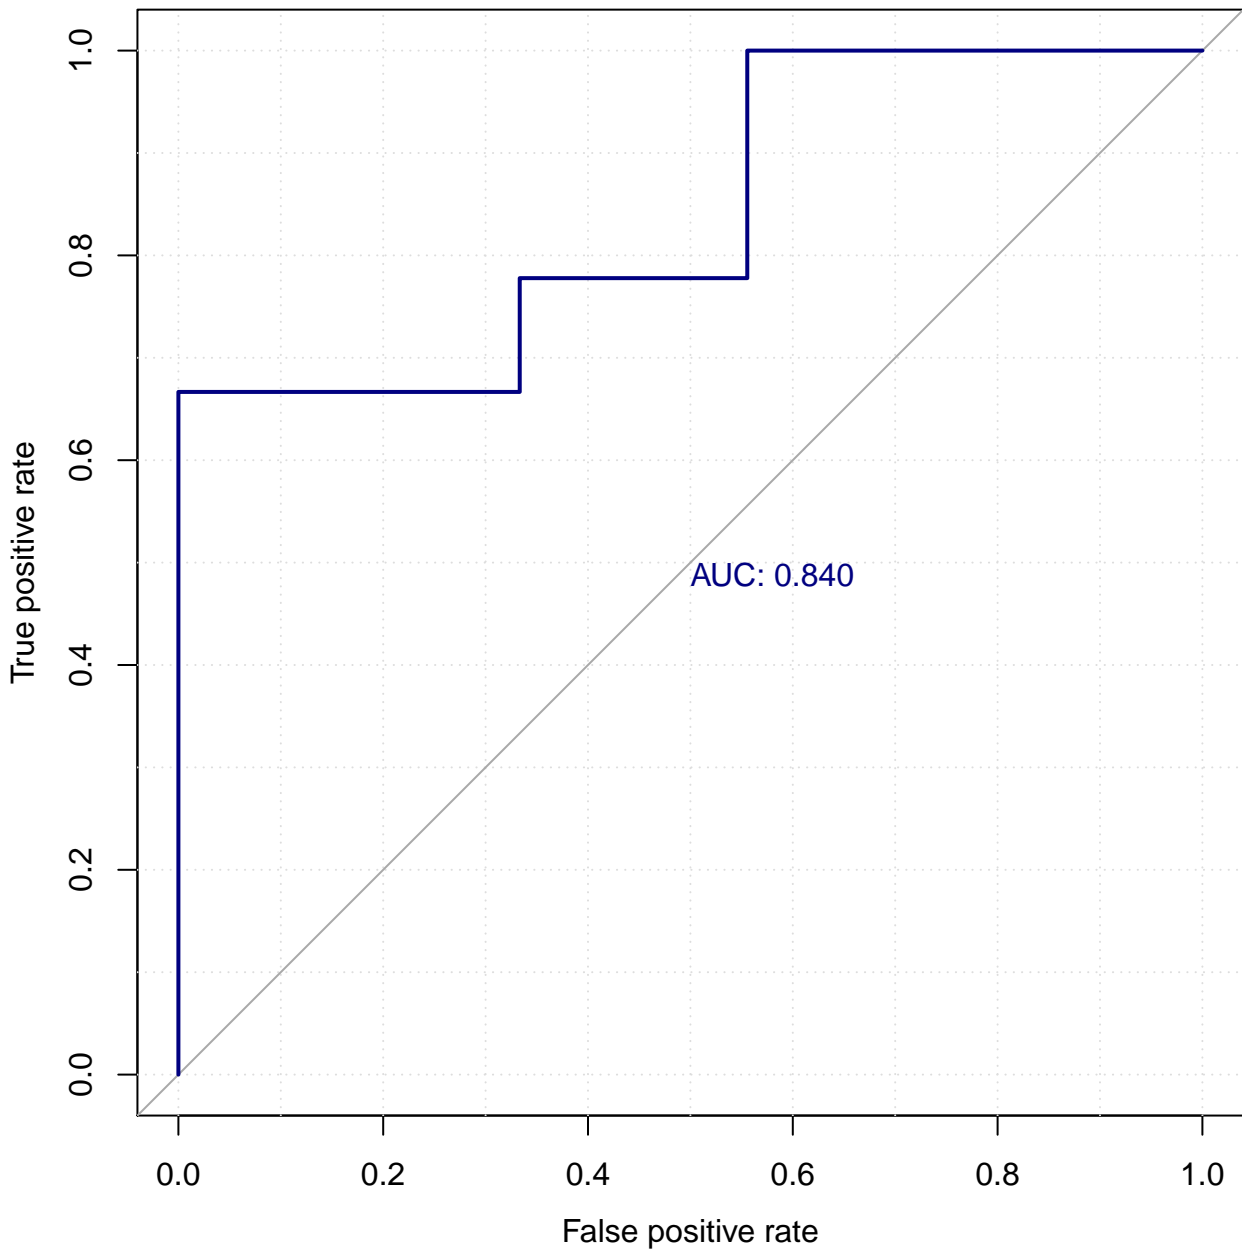

Supplement: RawDataResult.zip [file RawDataResult.zip]

H.vs.NH

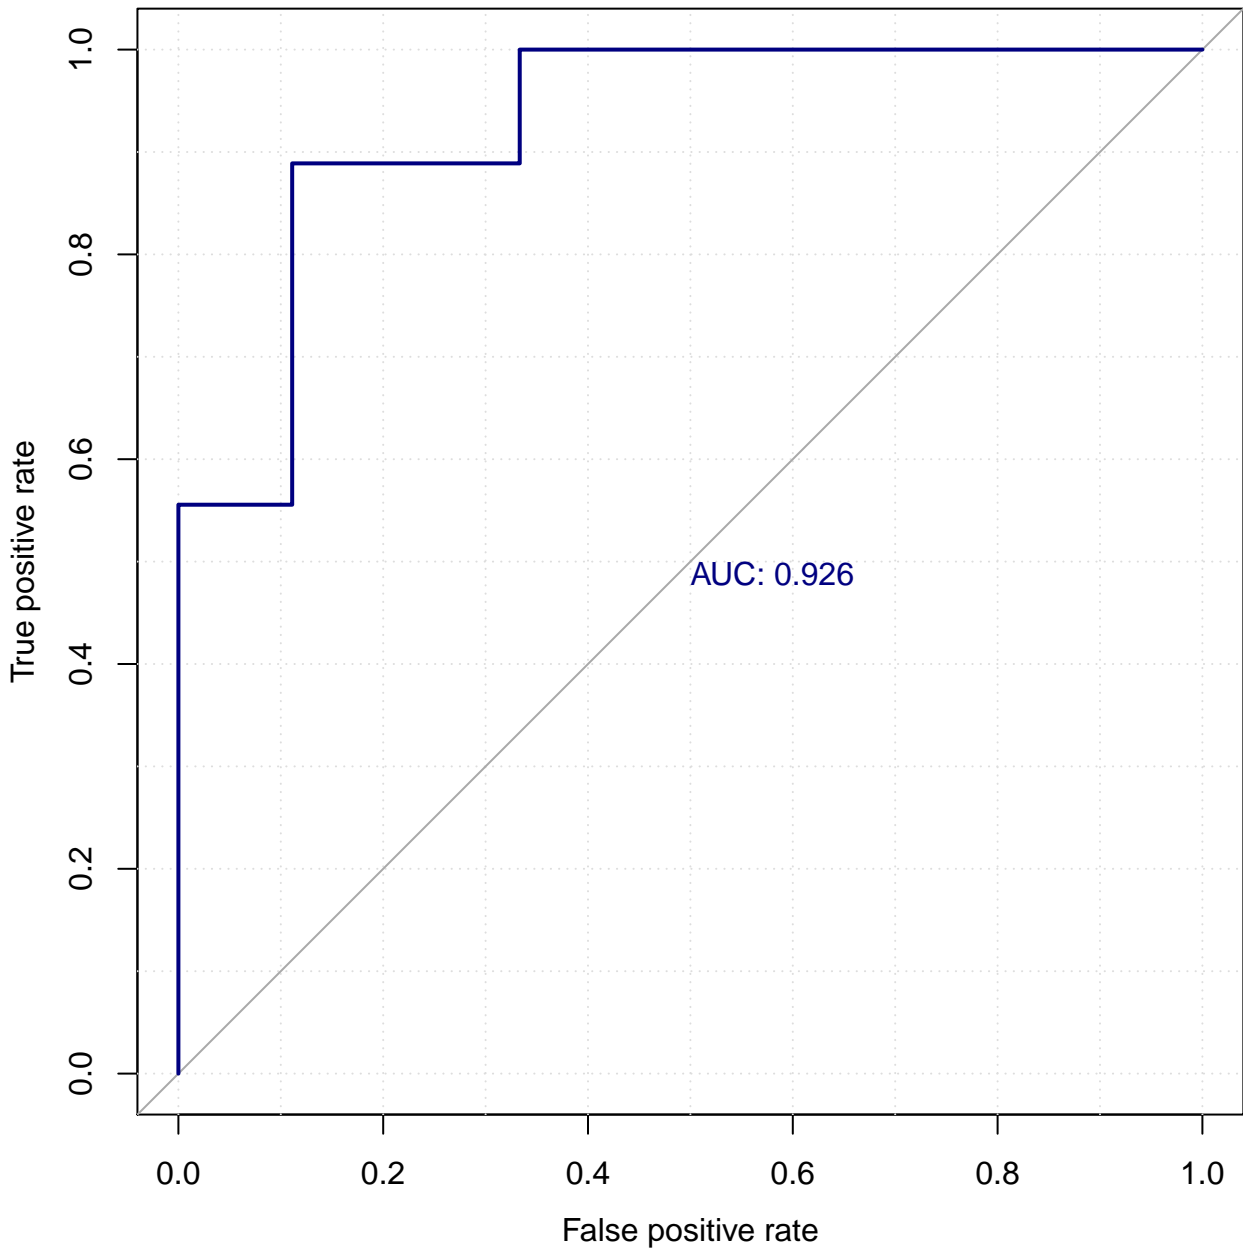

Supplement: RawDataResult.zip [file RawDataResult.zip]

# H.vs.NH

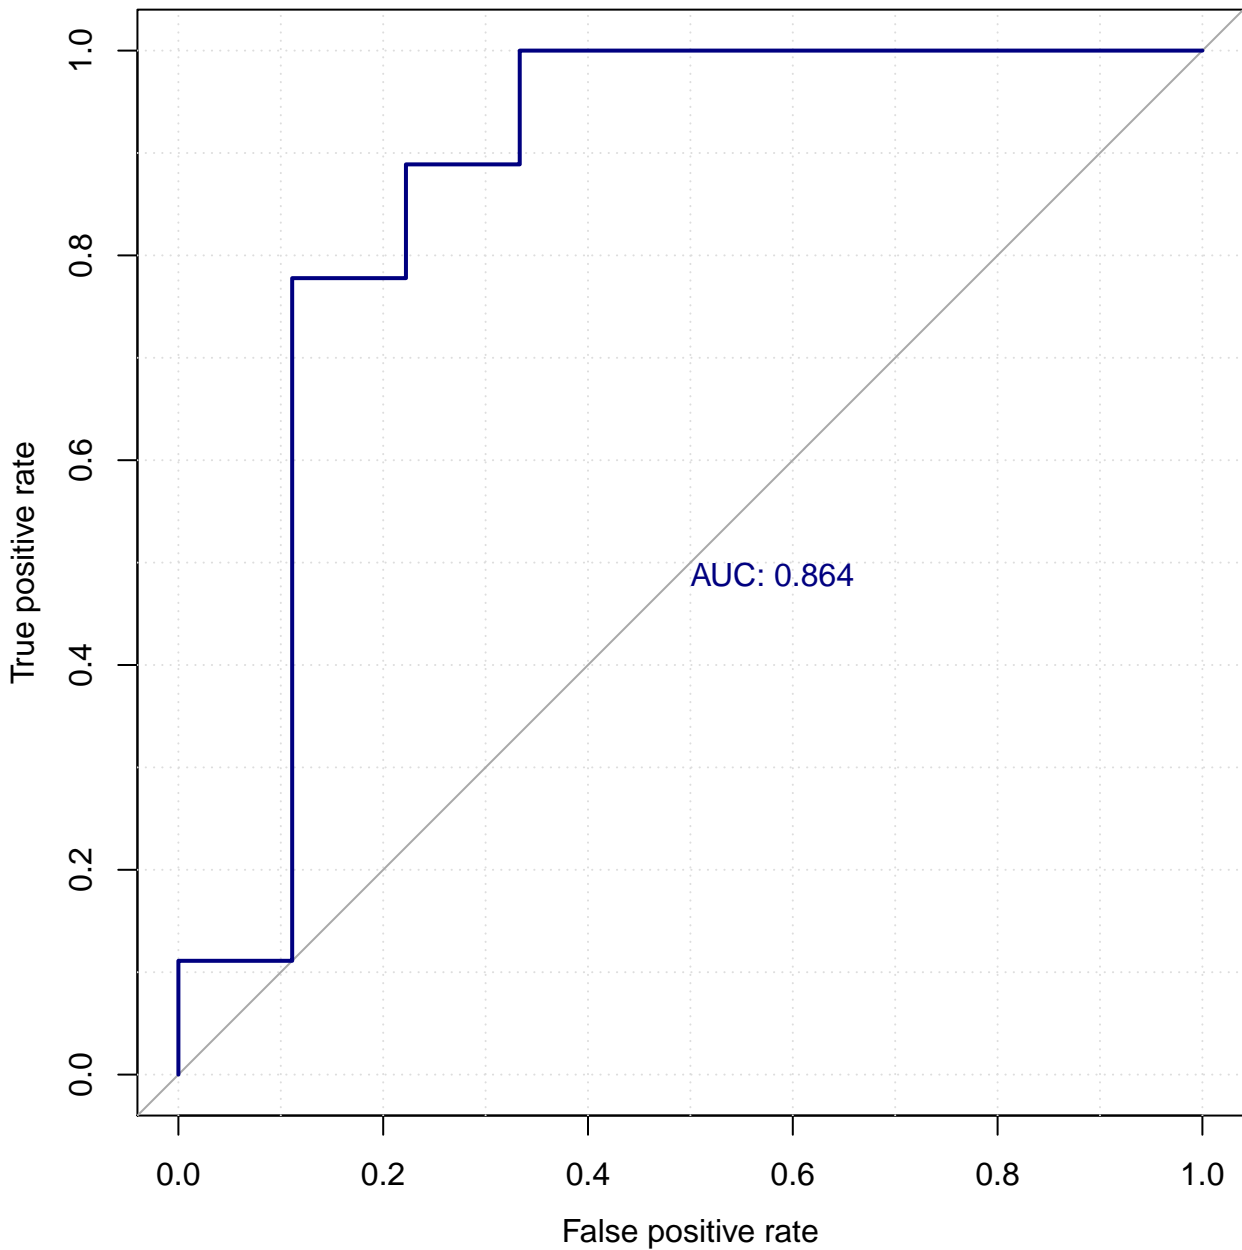

Supplement: RawDataResult.zip [file RawDataResult.zip]

H.vs.NH

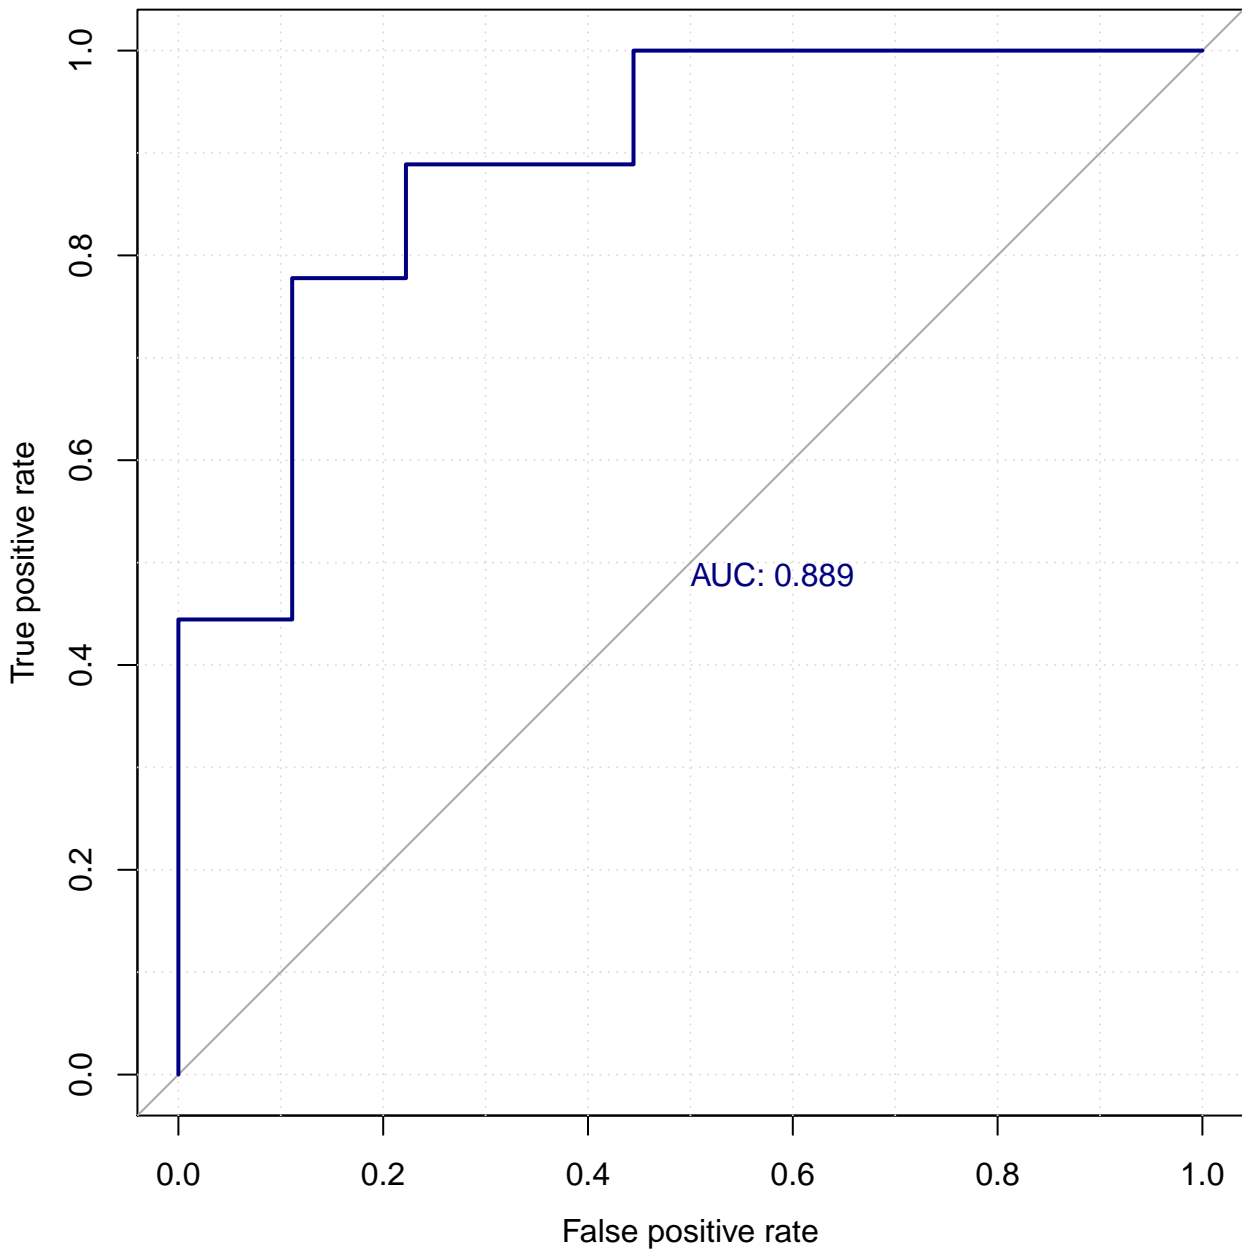

Supplement: RawDataResult.zip [file RawDataResult.zip]

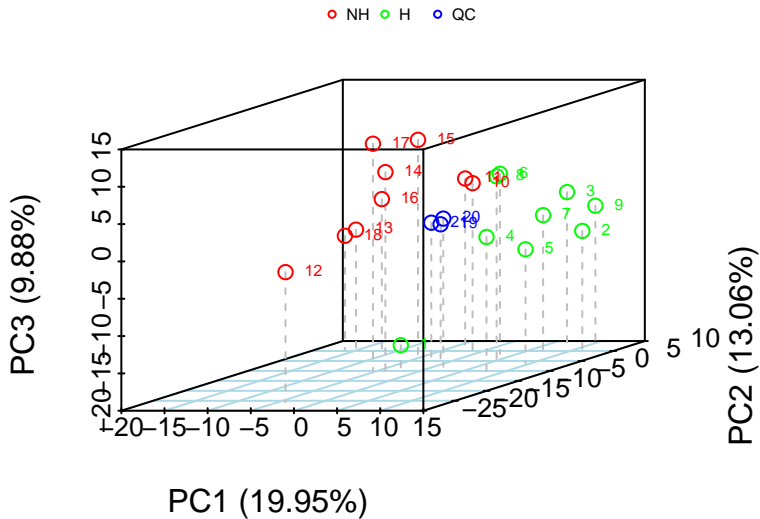

Supplement: RawDataResult.zip [file RawDataResult.zip]

# H.vs.NH

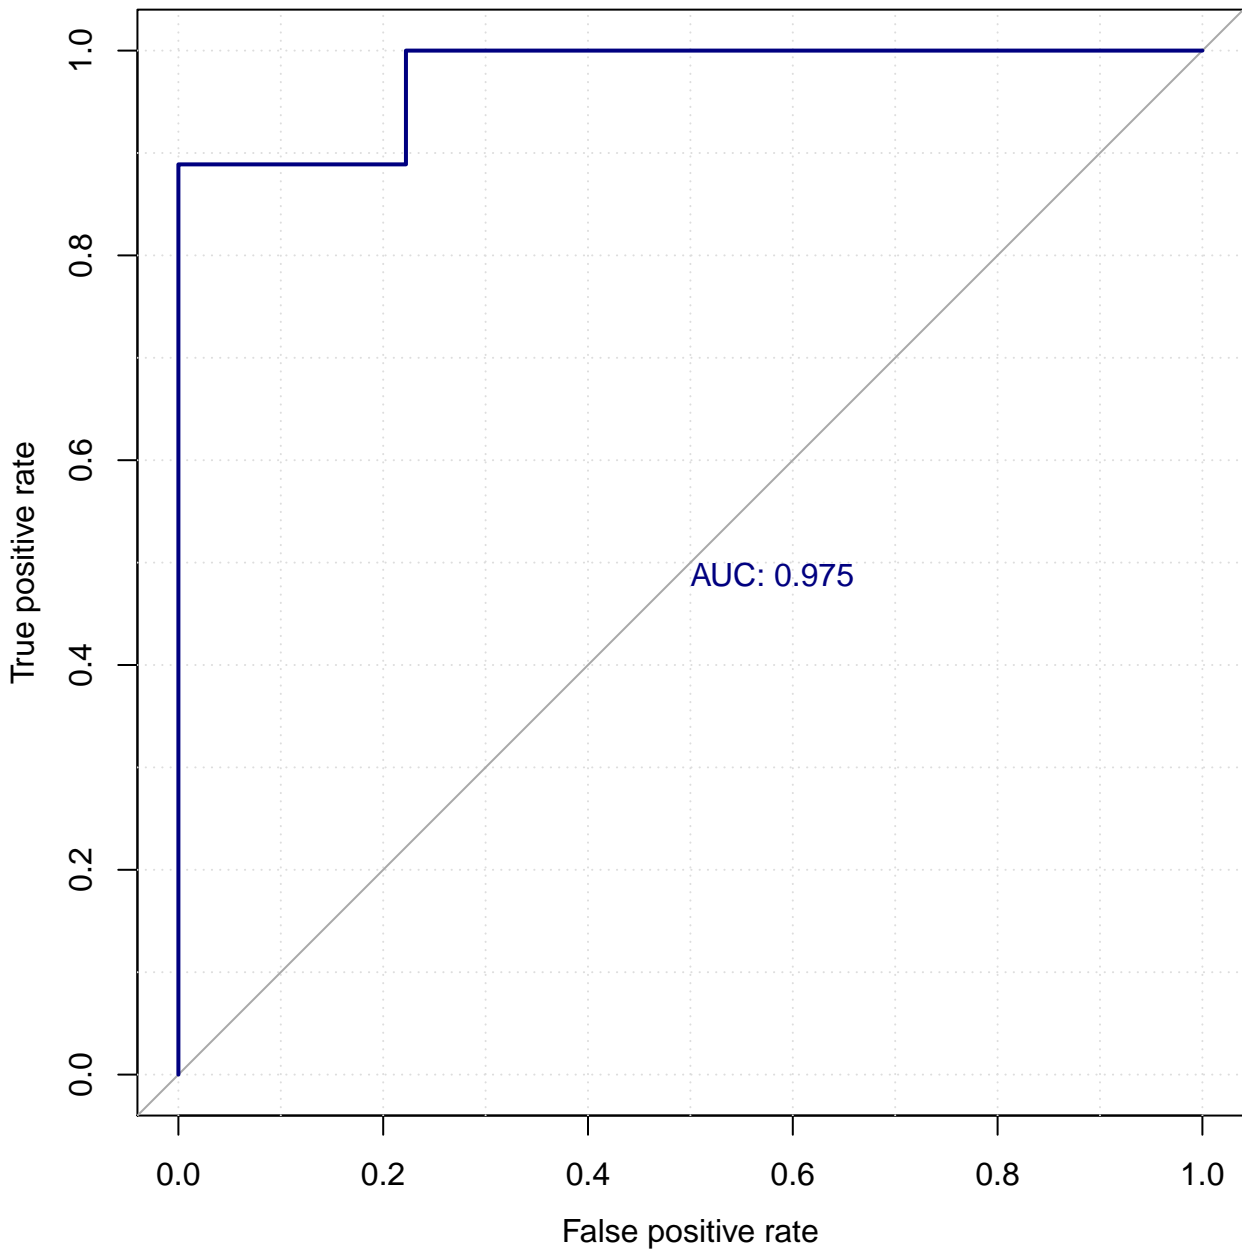

Supplement: RawDataResult.zip [file RawDataResult.zip]

# H.vs.NH

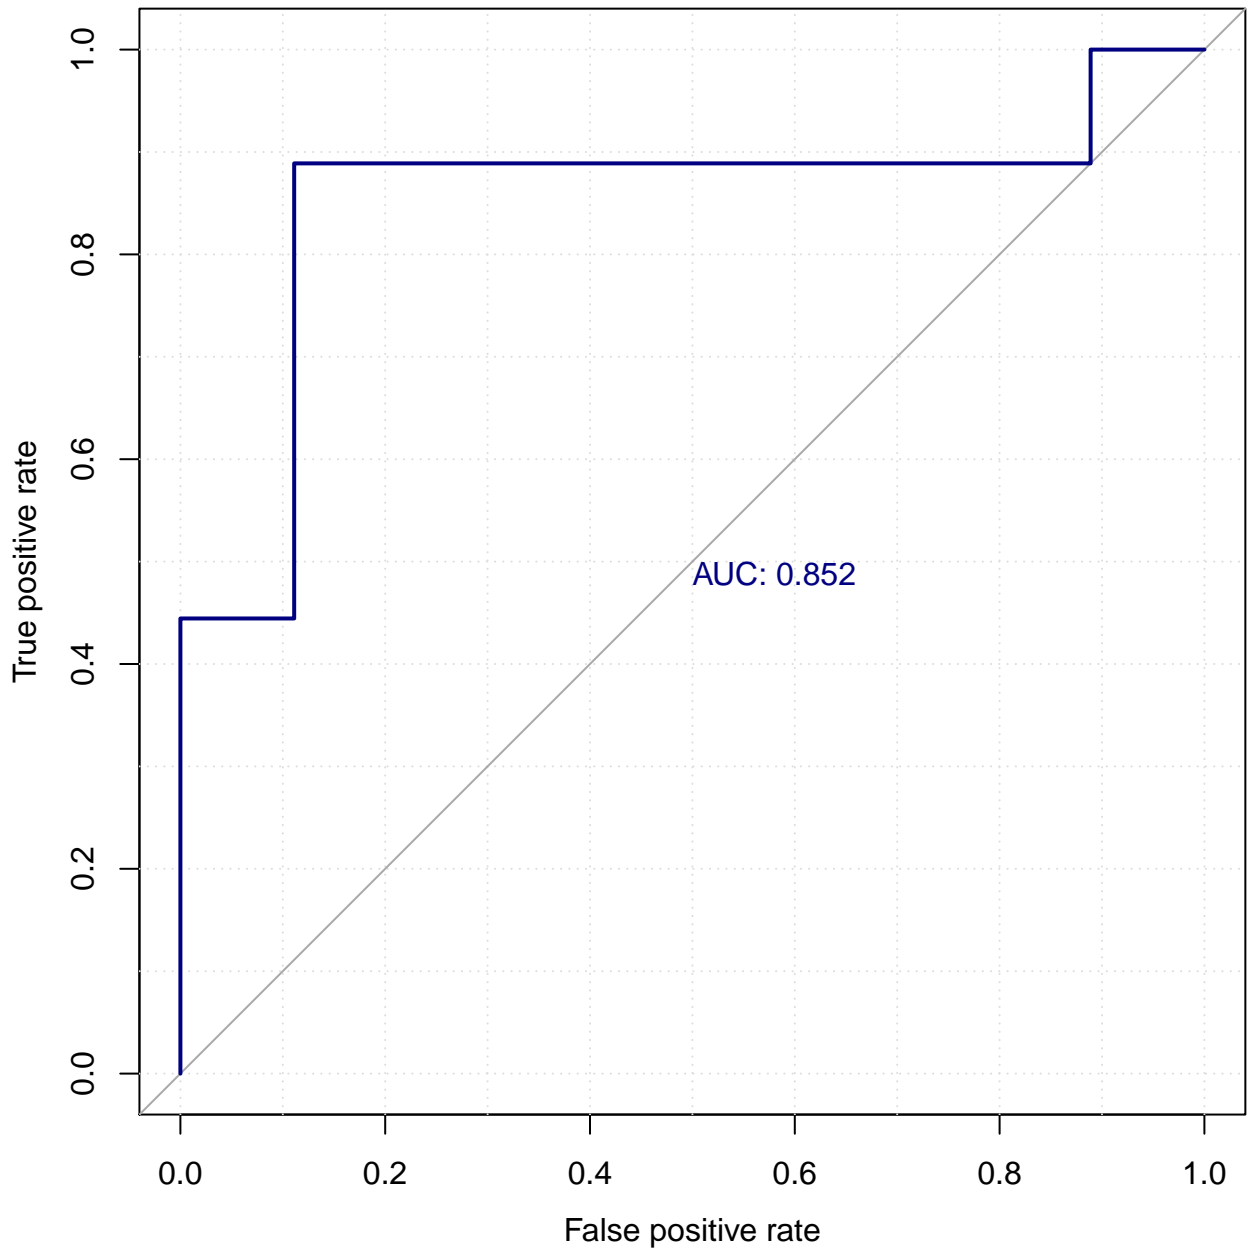

Supplement: RawDataResult.zip [file RawDataResult.zip]

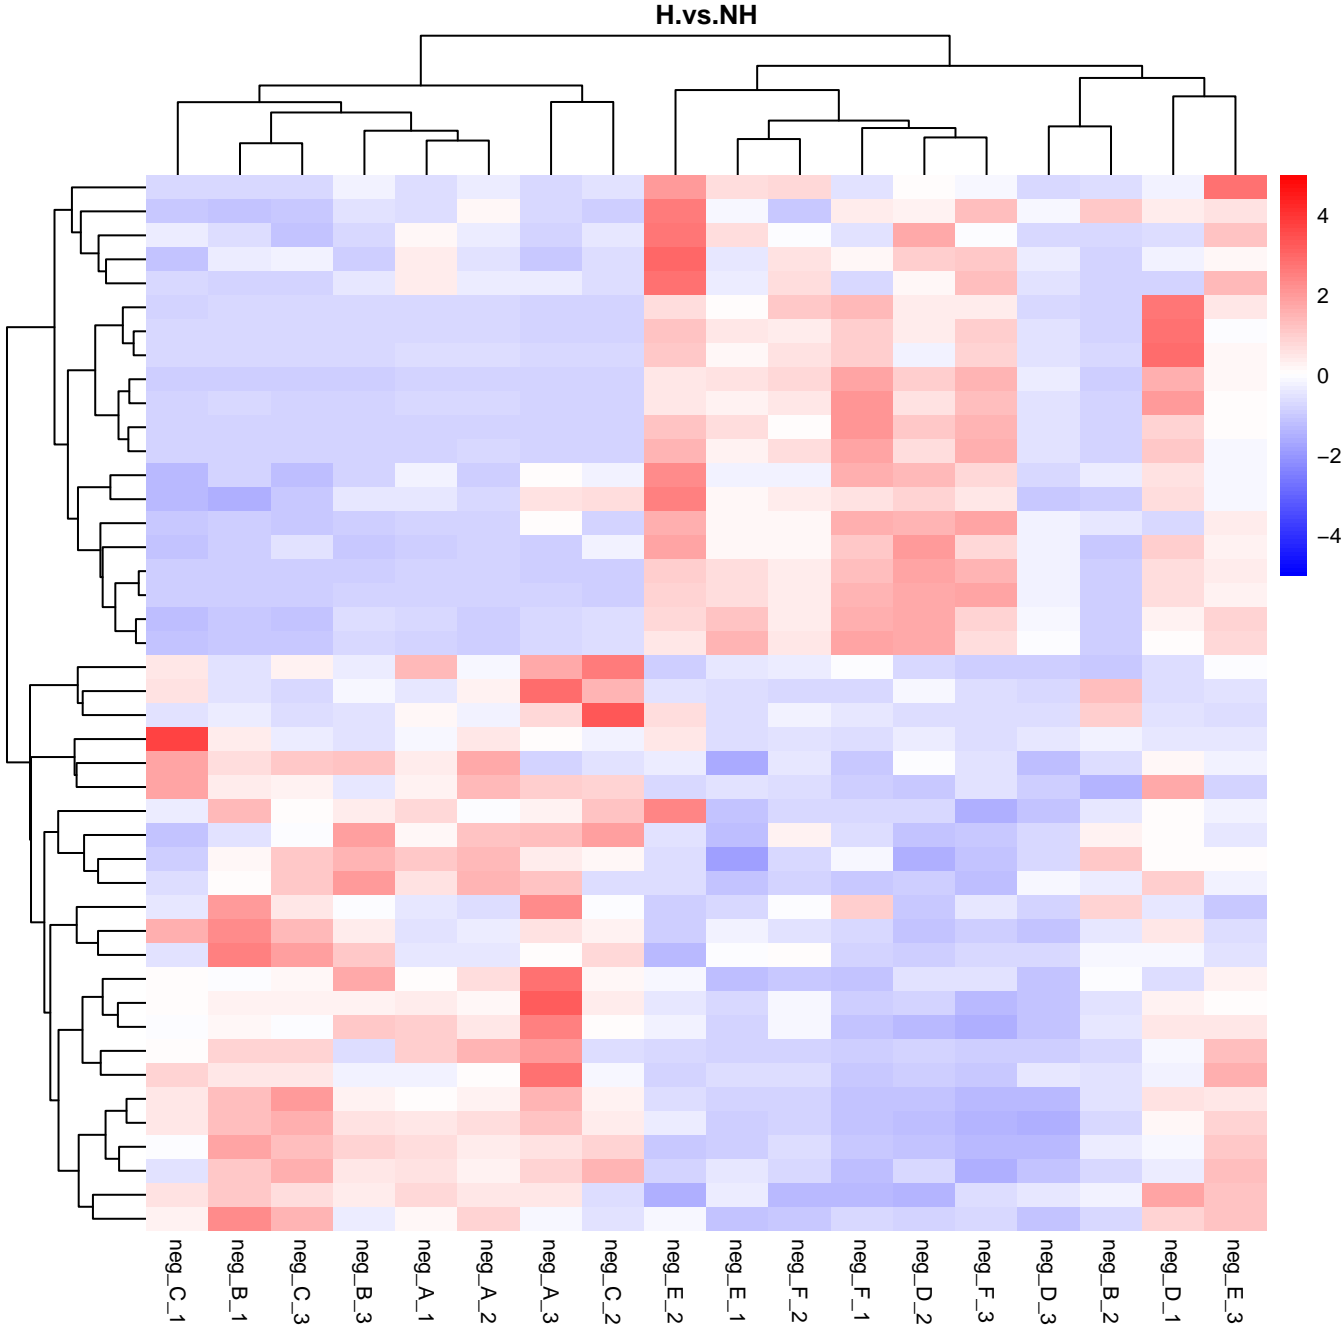

Supplement: RawDataResult.zip [file RawDataResult.zip]

# H.vs.NH

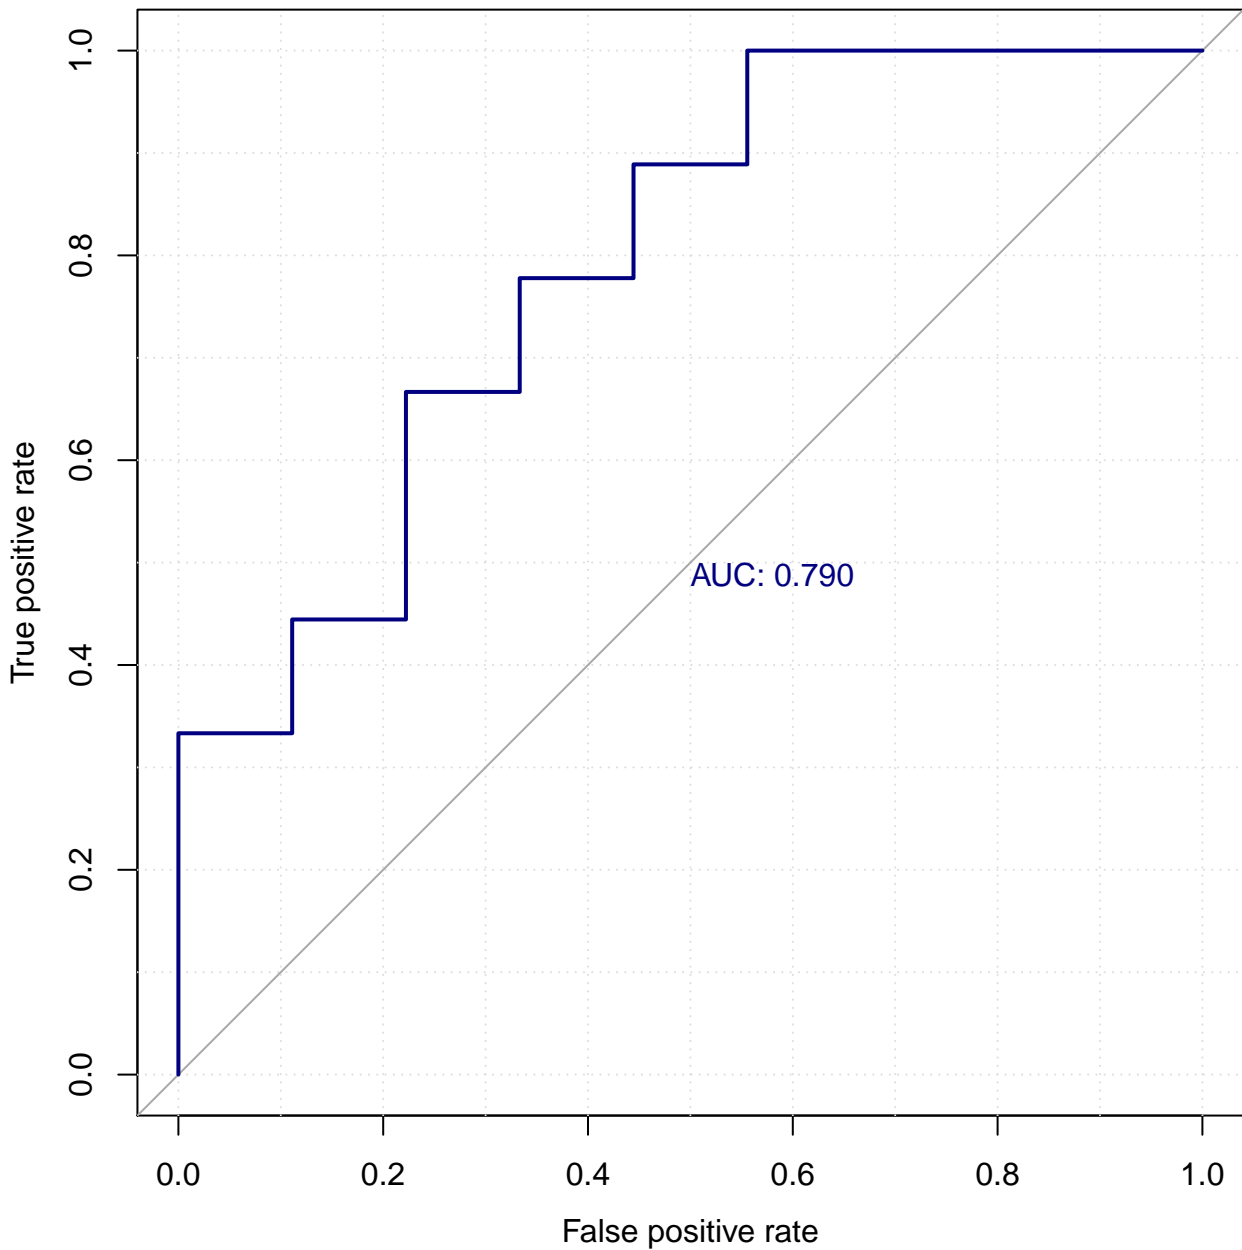

Supplement: RawDataResult.zip [file RawDataResult.zip]

H.vs.NH

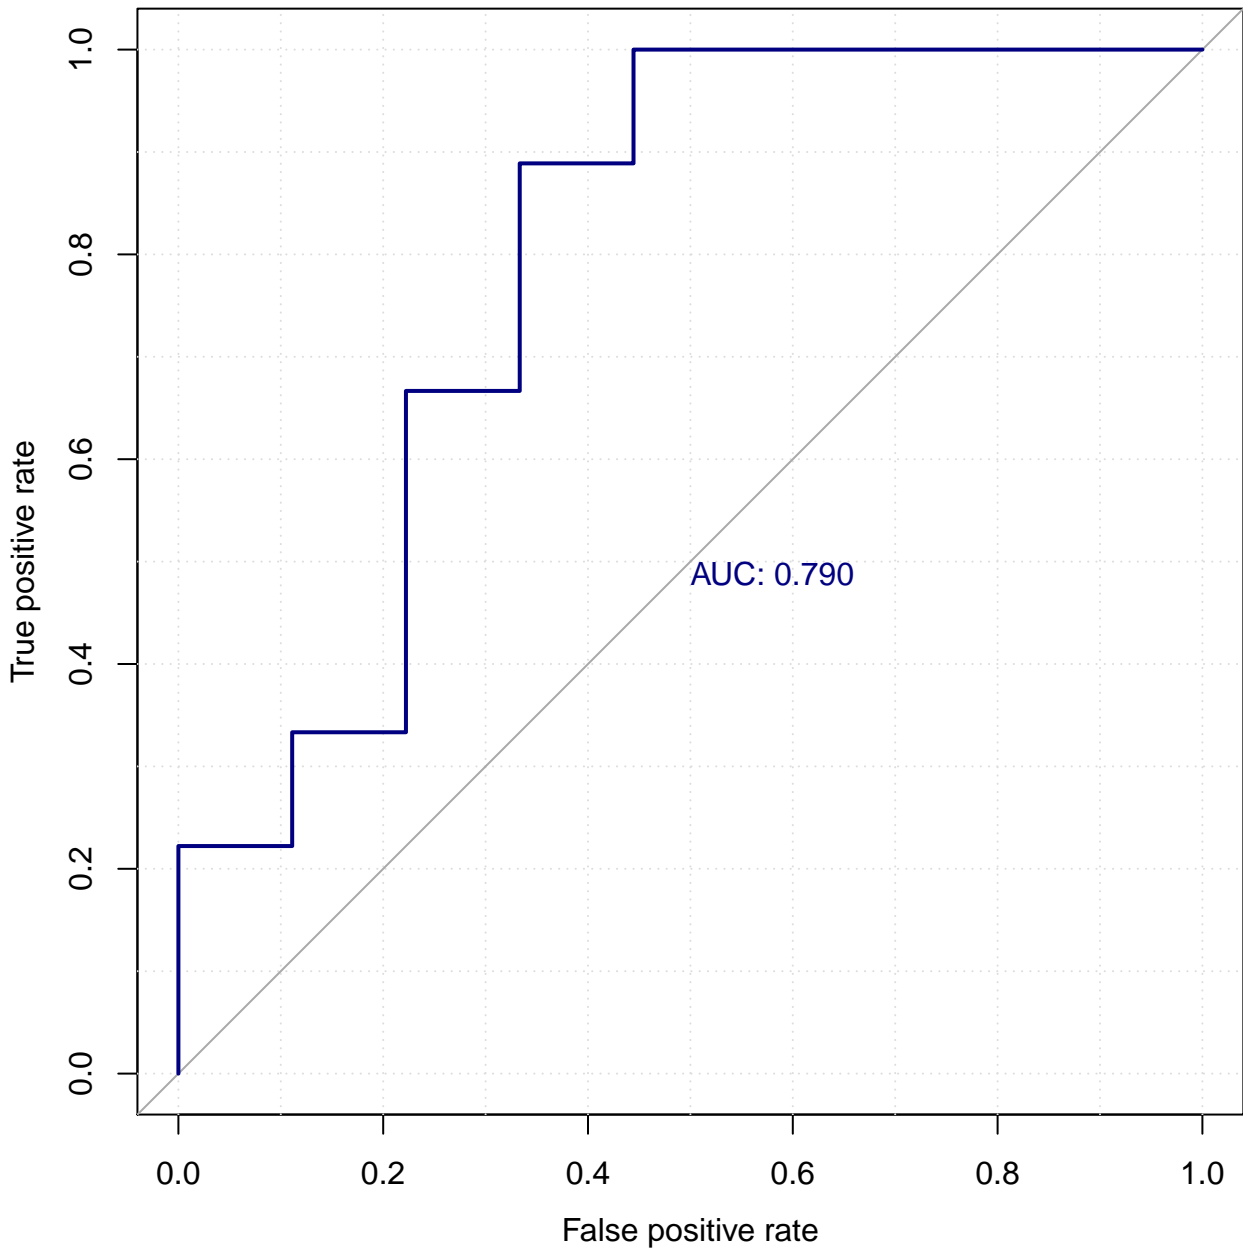

Supplement: RawDataResult.zip [file RawDataResult.zip]

# H.vs.NH

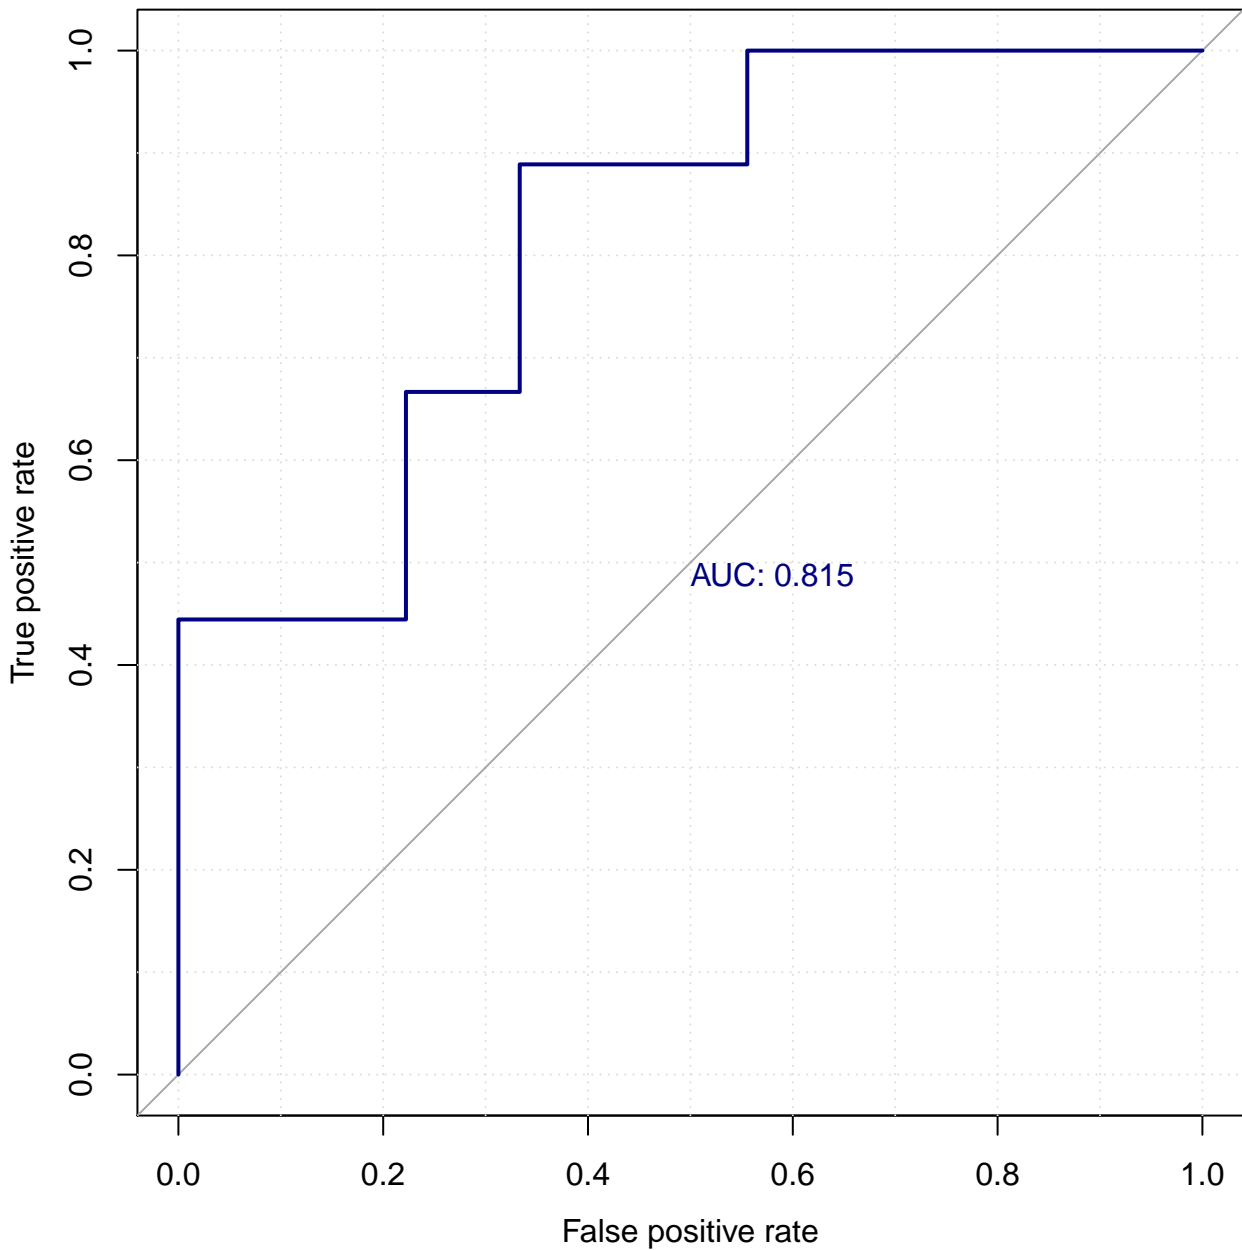

Supplement: RawDataResult.zip [file RawDataResult.zip]

# H.vs.NH

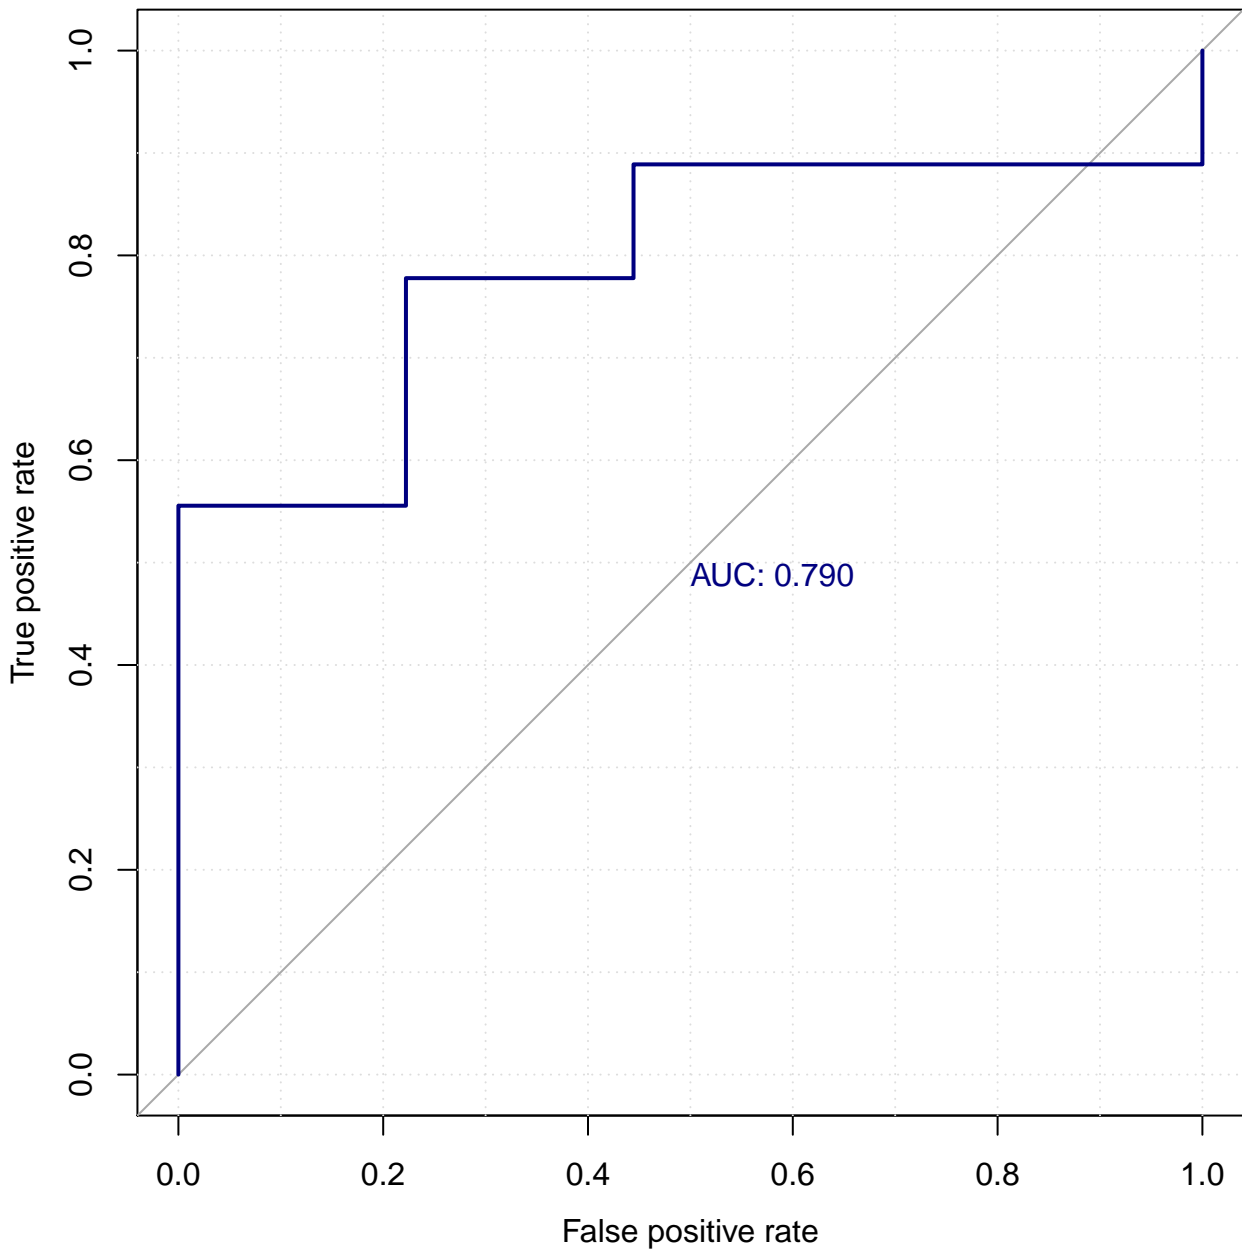

Supplement: RawDataResult.zip [file RawDataResult.zip]

# H.vs.NH

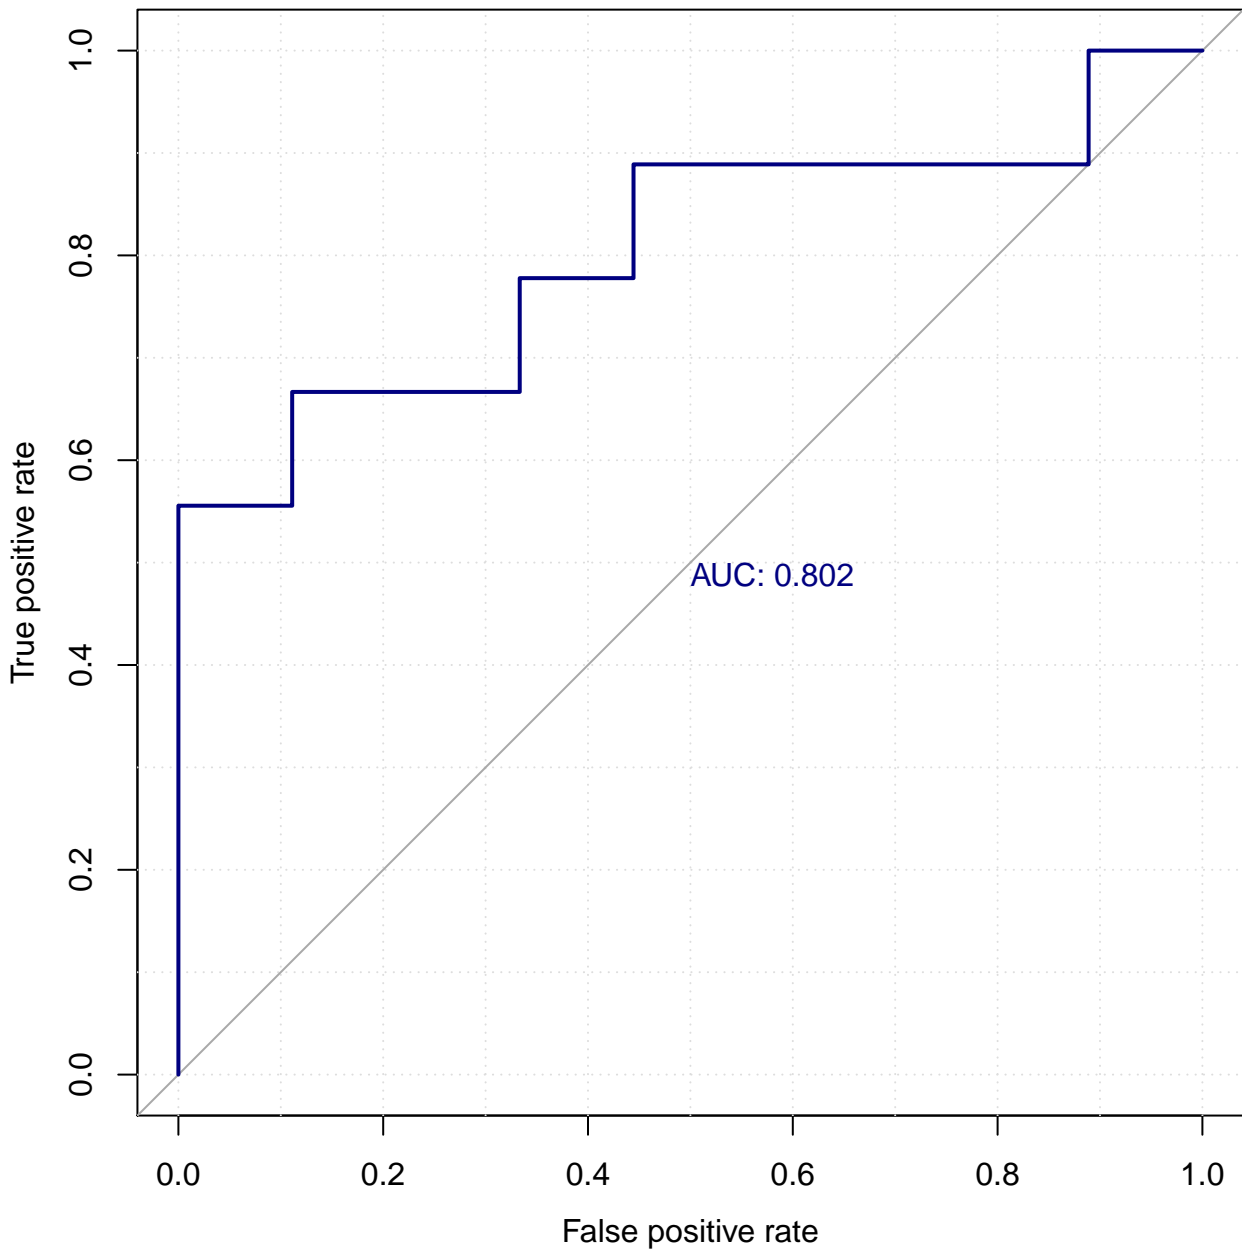

Supplement: RawDataResult.zip [file RawDataResult.zip]

H.vs.NH

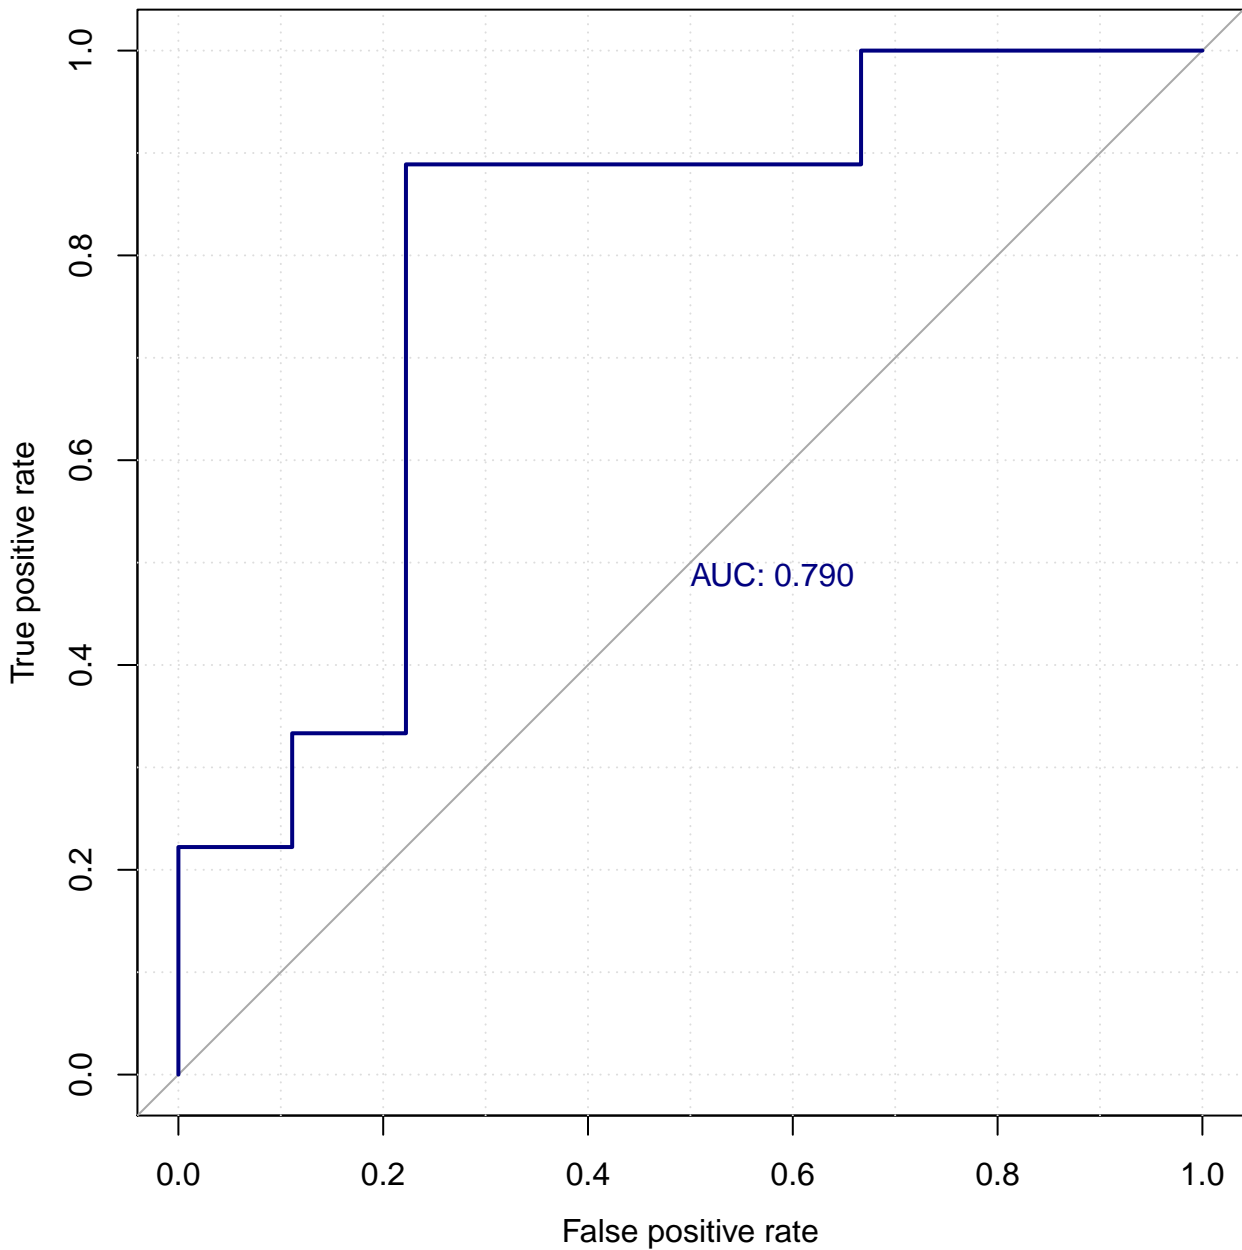

Supplement: RawDataResult.zip [file RawDataResult.zip]

Pearson correlation between neg QC samples

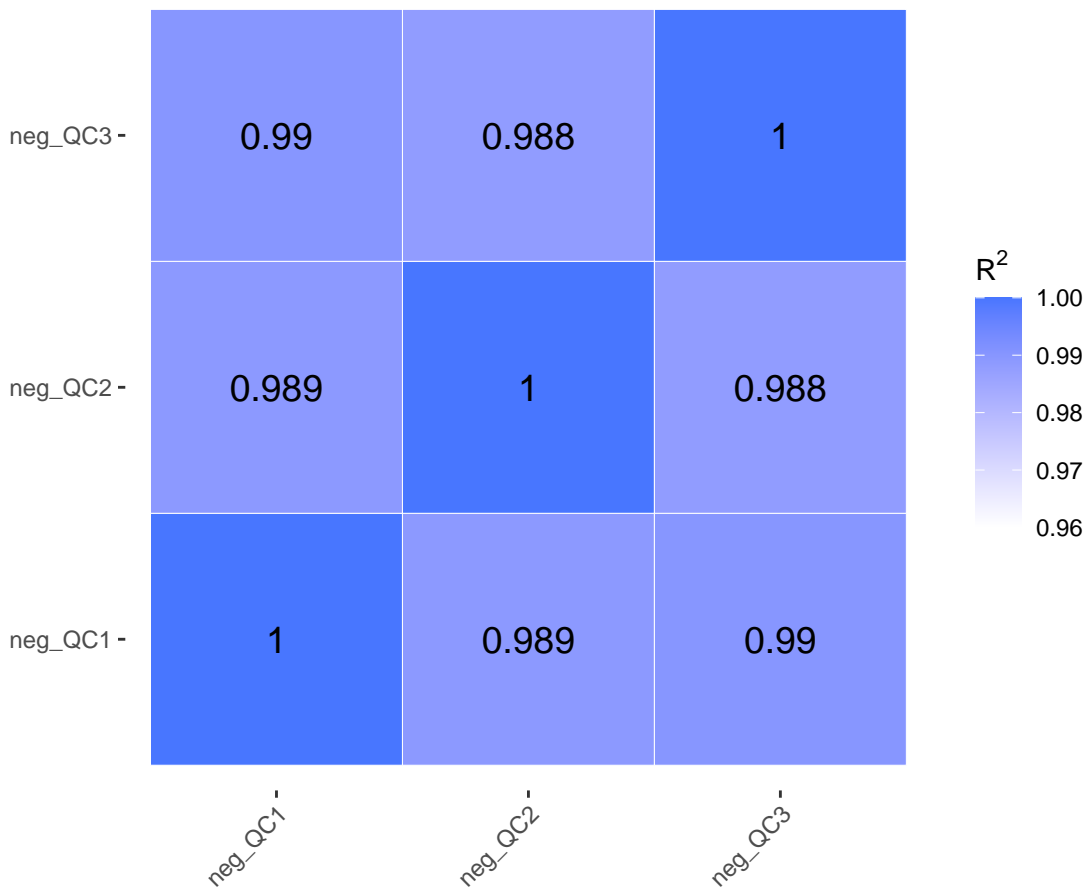

Supplement: RawDataResult.zip [file RawDataResult.zip]

# H.vs.NH

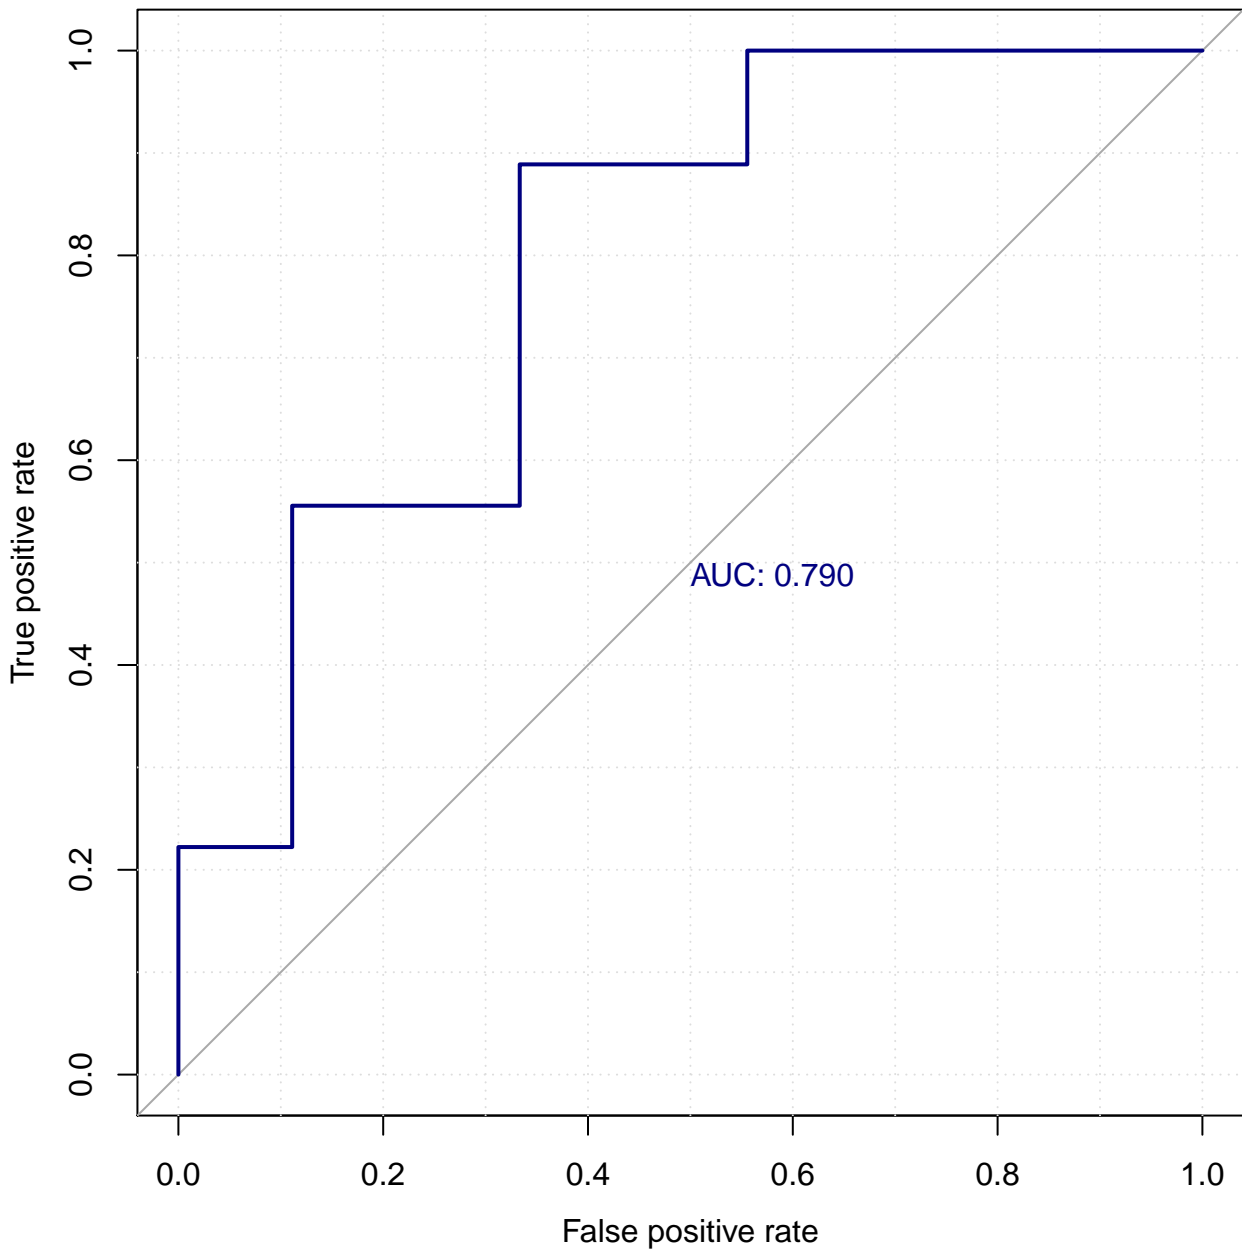

Supplement: RawDataResult.zip [file RawDataResult.zip]

# H.vs.NH

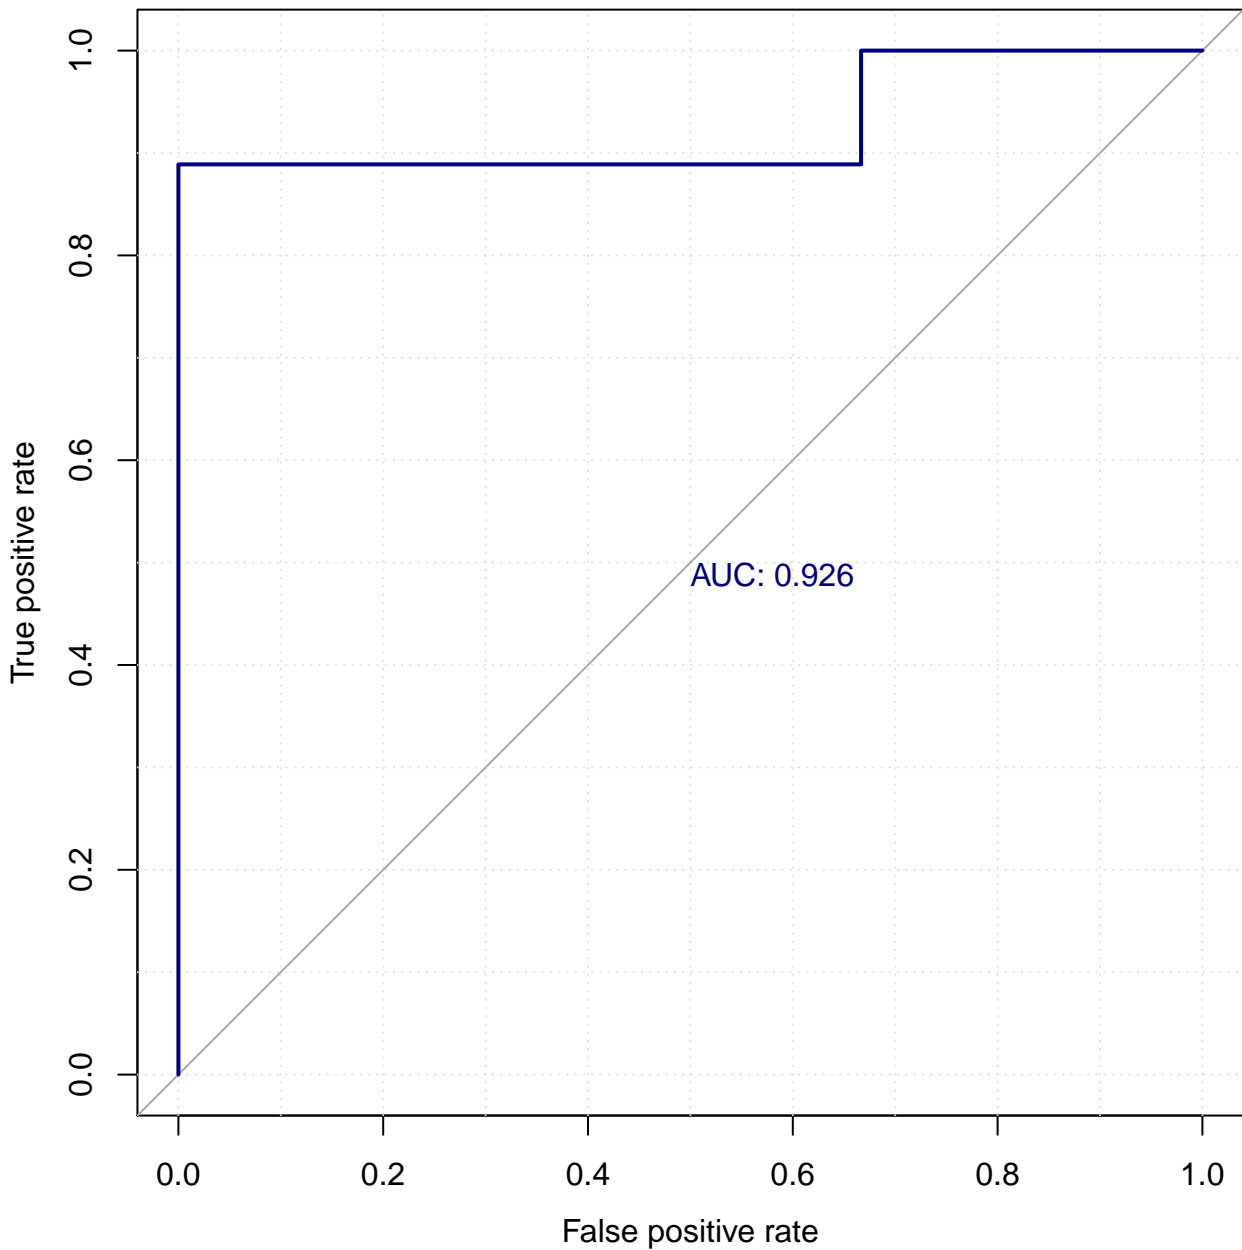

Supplement: RawDataResult.zip [file RawDataResult.zip]

# H.vs.NH

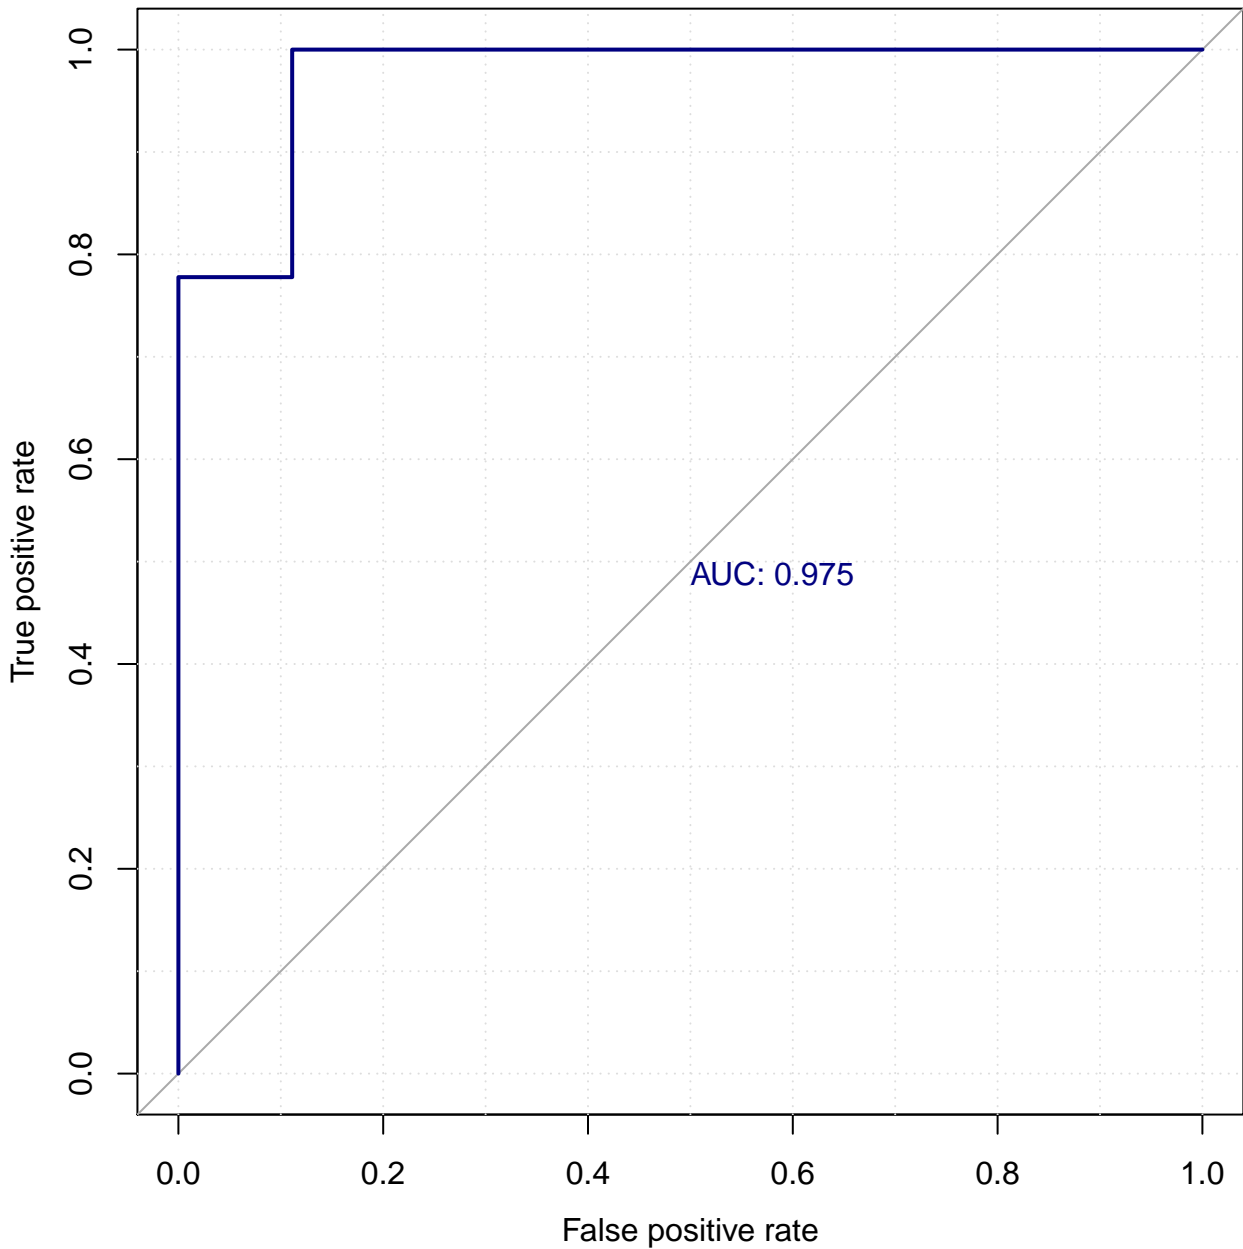

Supplement: RawDataResult.zip [file RawDataResult.zip]

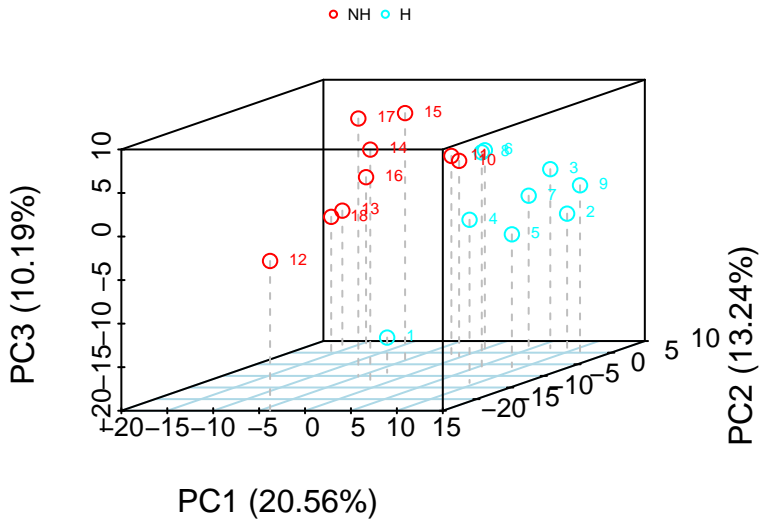

Supplement: RawDataResult.zip [file RawDataResult.zip]

H.vs.NH

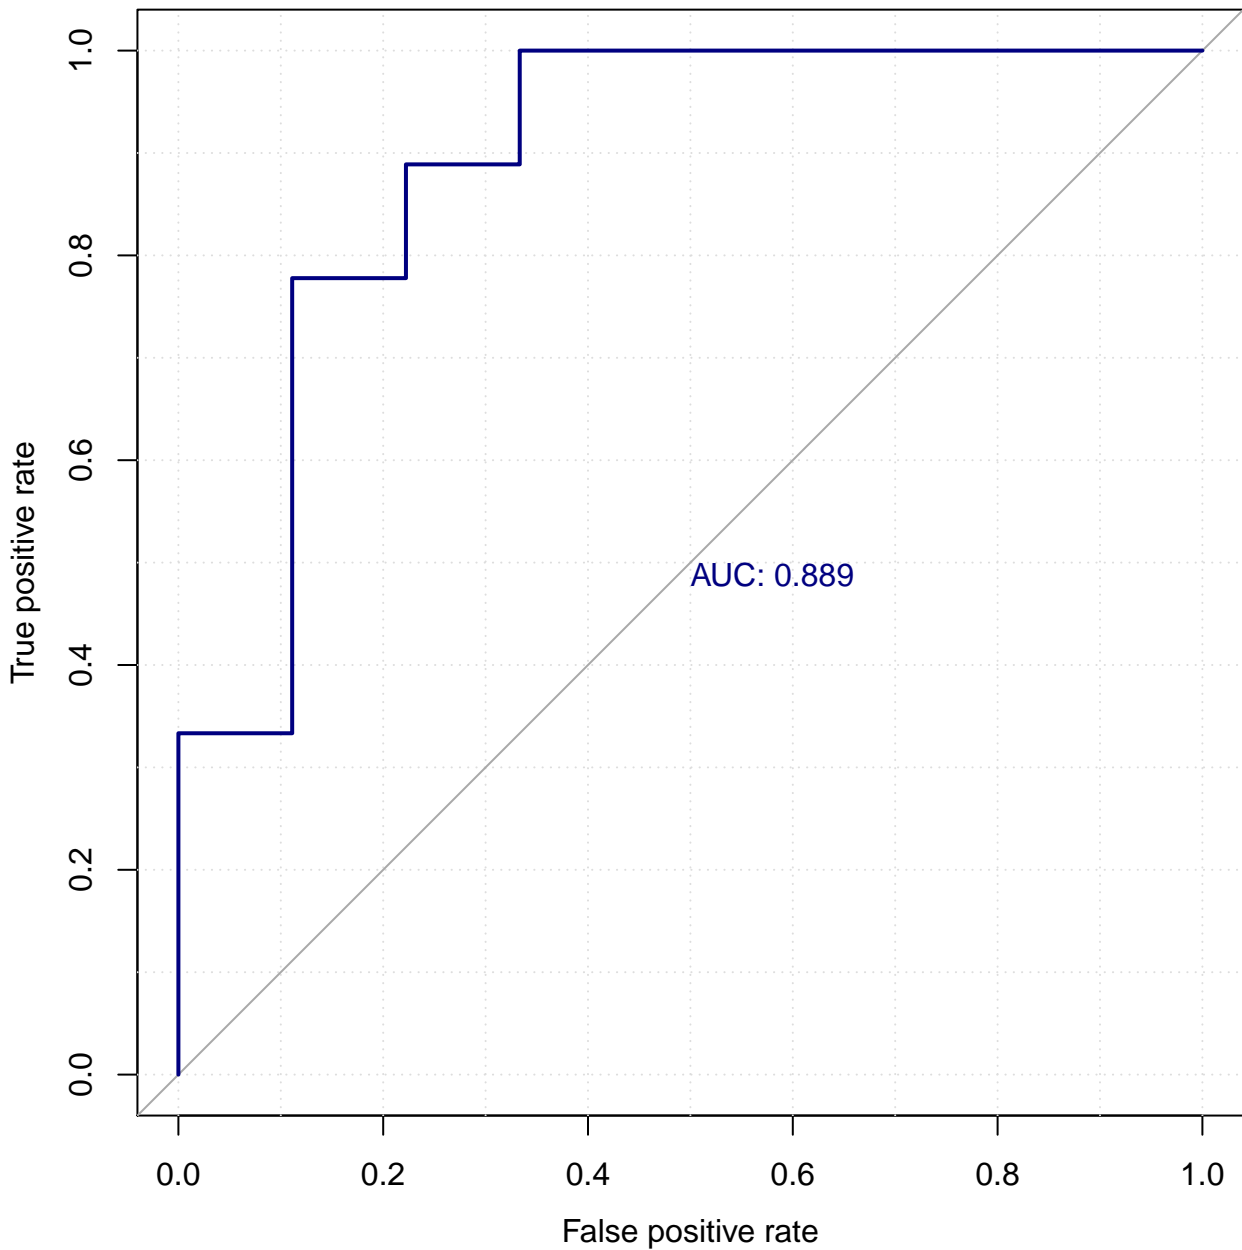

Supplement: RawDataResult.zip [file RawDataResult.zip]

# H.vs.NH

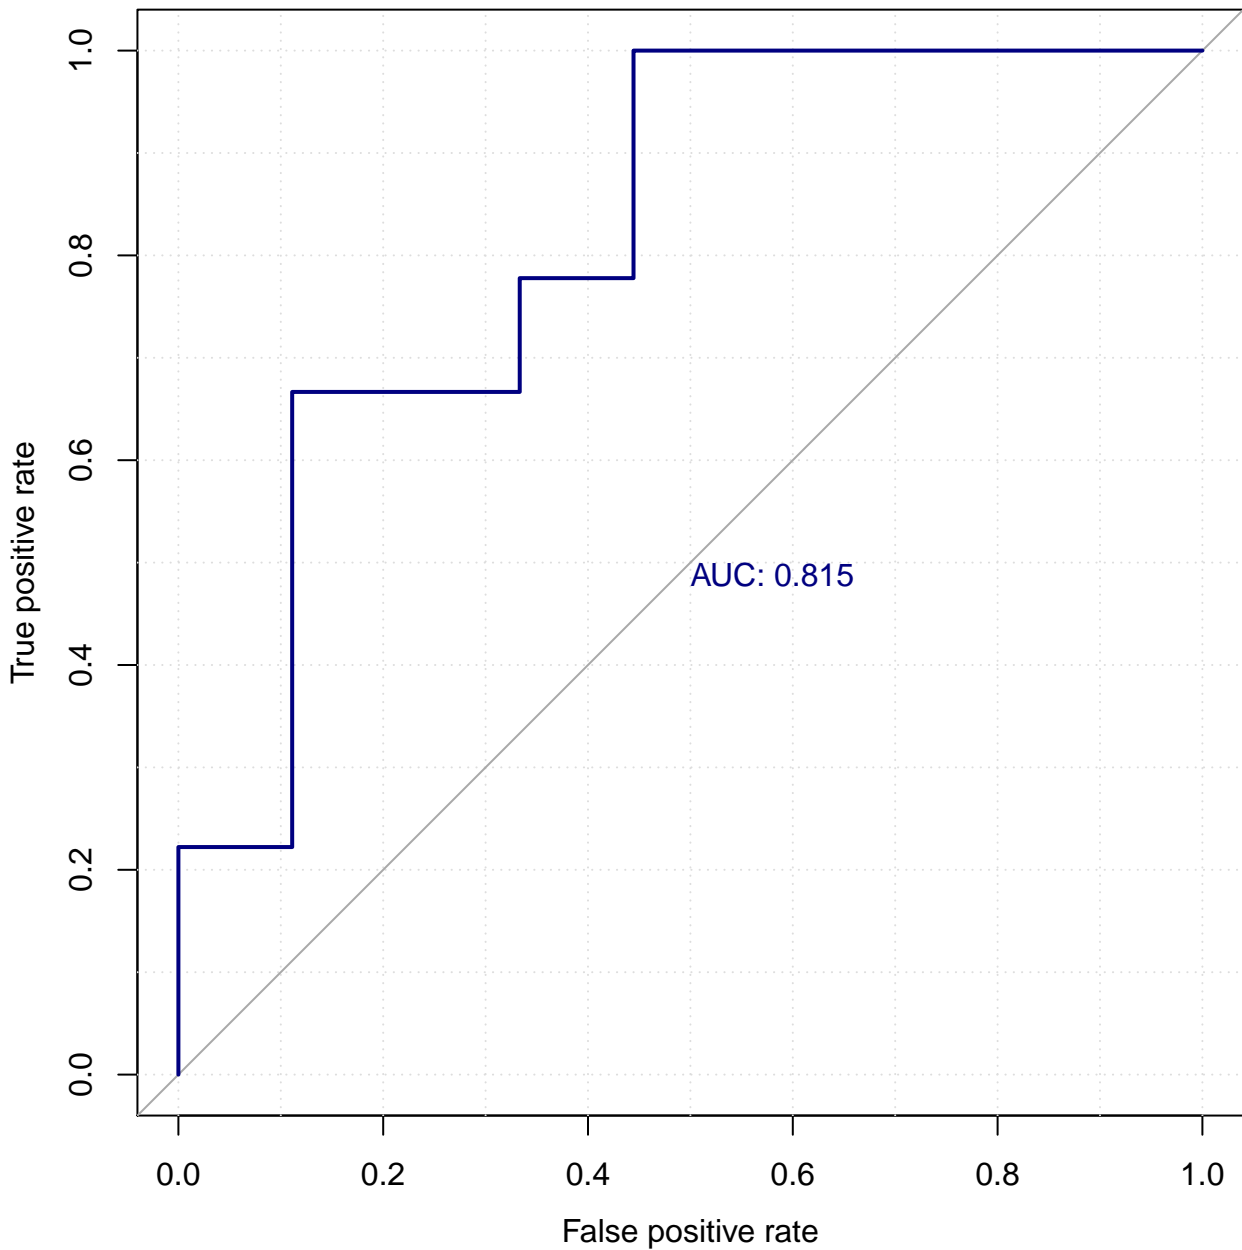

Supplement: RawDataResult.zip [file RawDataResult.zip]

# H.vs.NH

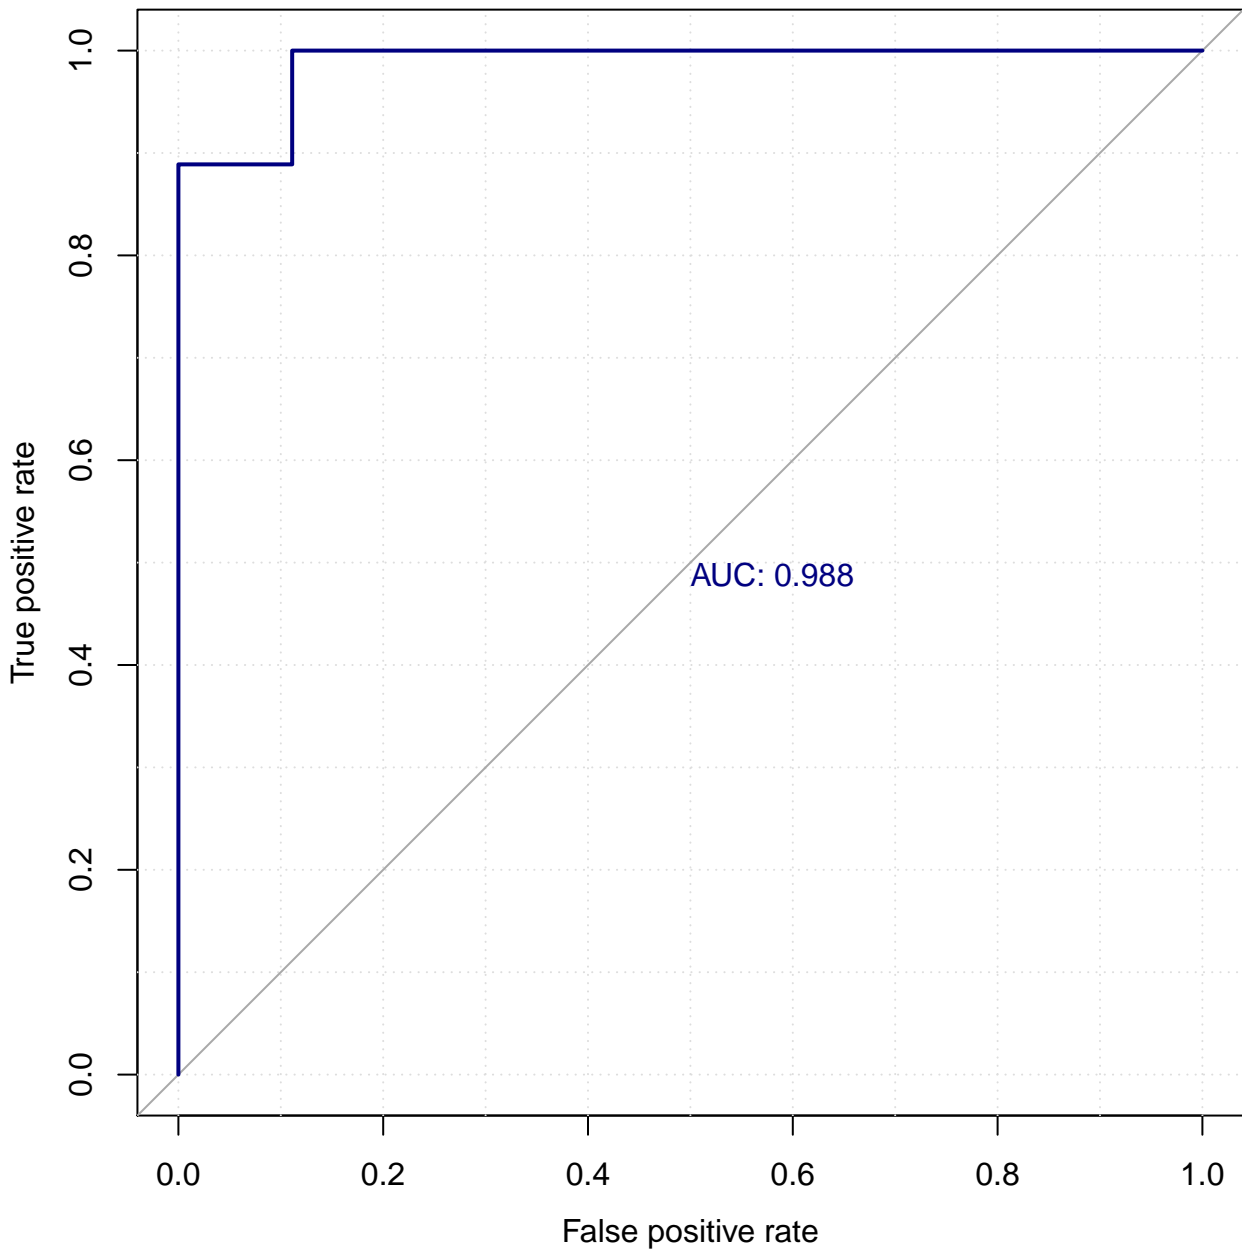

Supplement: RawDataResult.zip [file RawDataResult.zip]

H.vs.NH\_pos

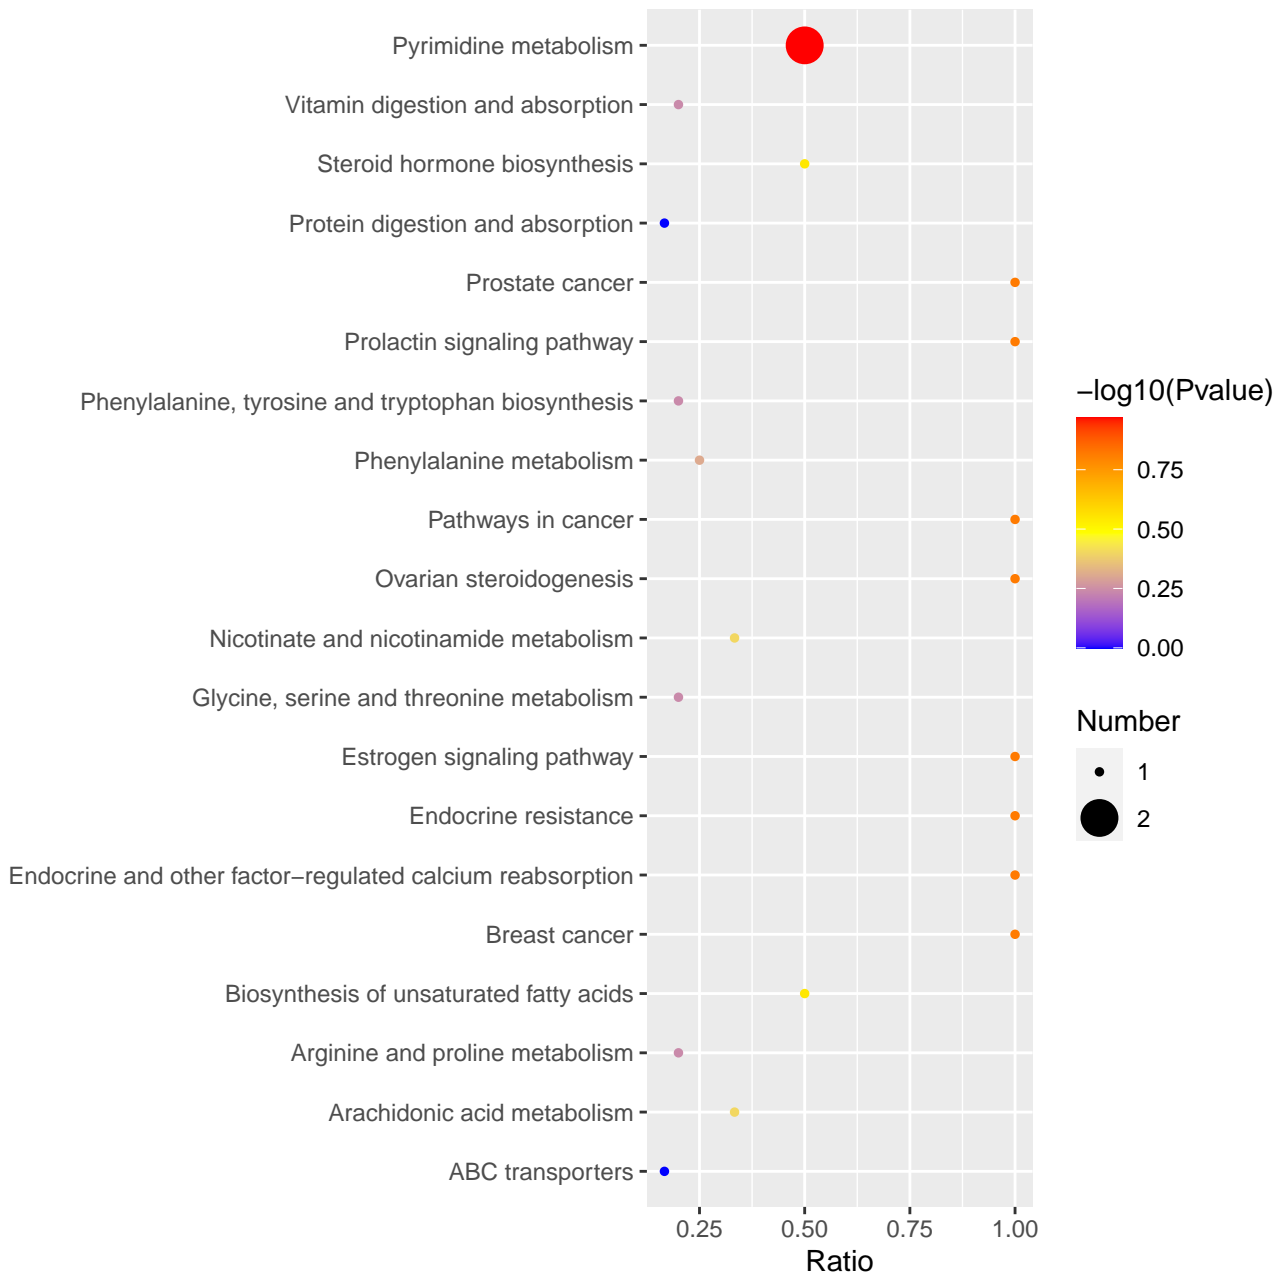

Supplement: RawDataResult.zip [file RawDataResult.zip]

H.vs.NH

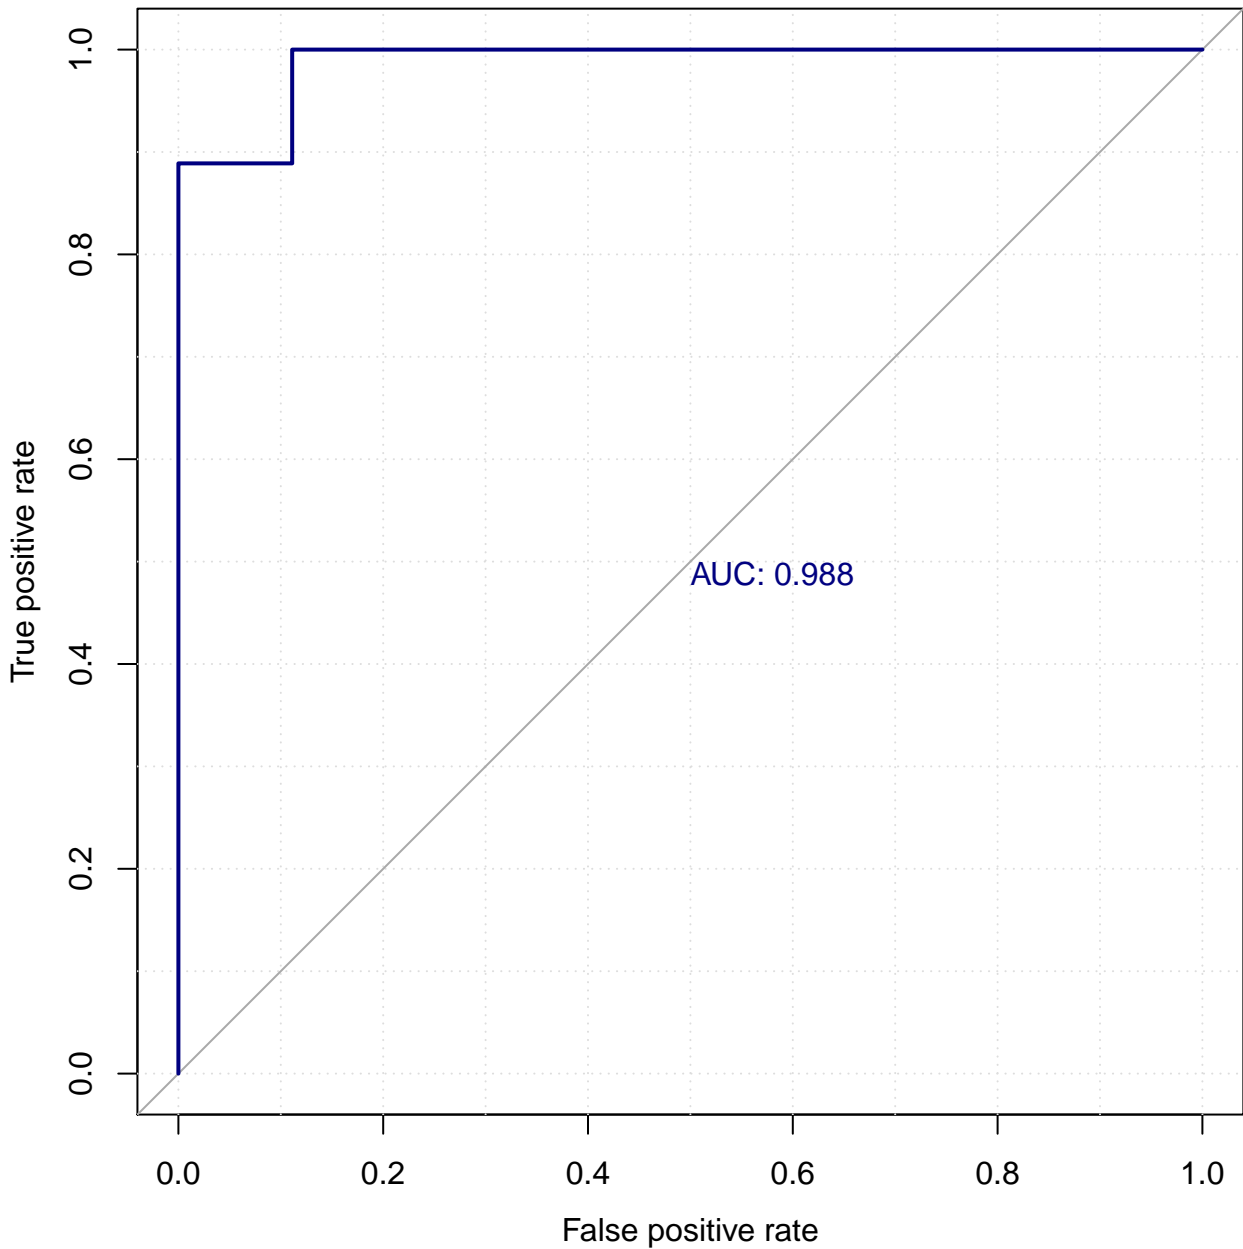

Supplement: RawDataResult.zip [file RawDataResult.zip]

H.vs.NH

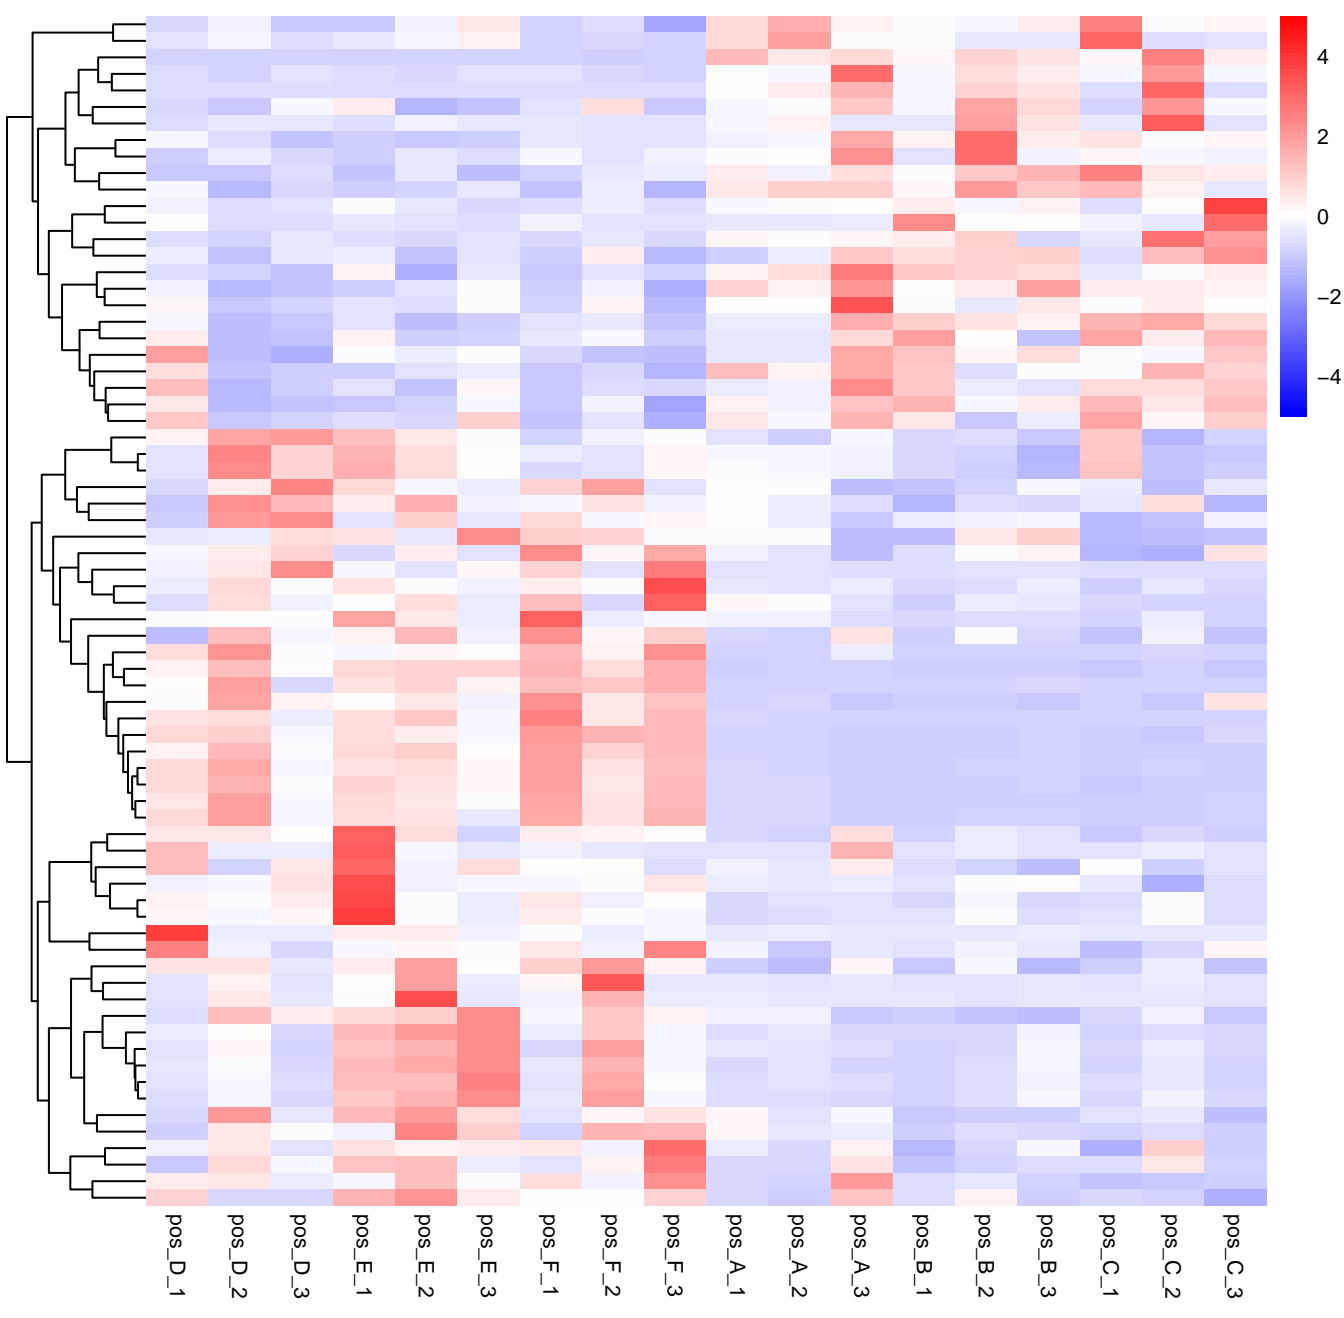

Supplement: RawDataResult.zip [file RawDataResult.zip]

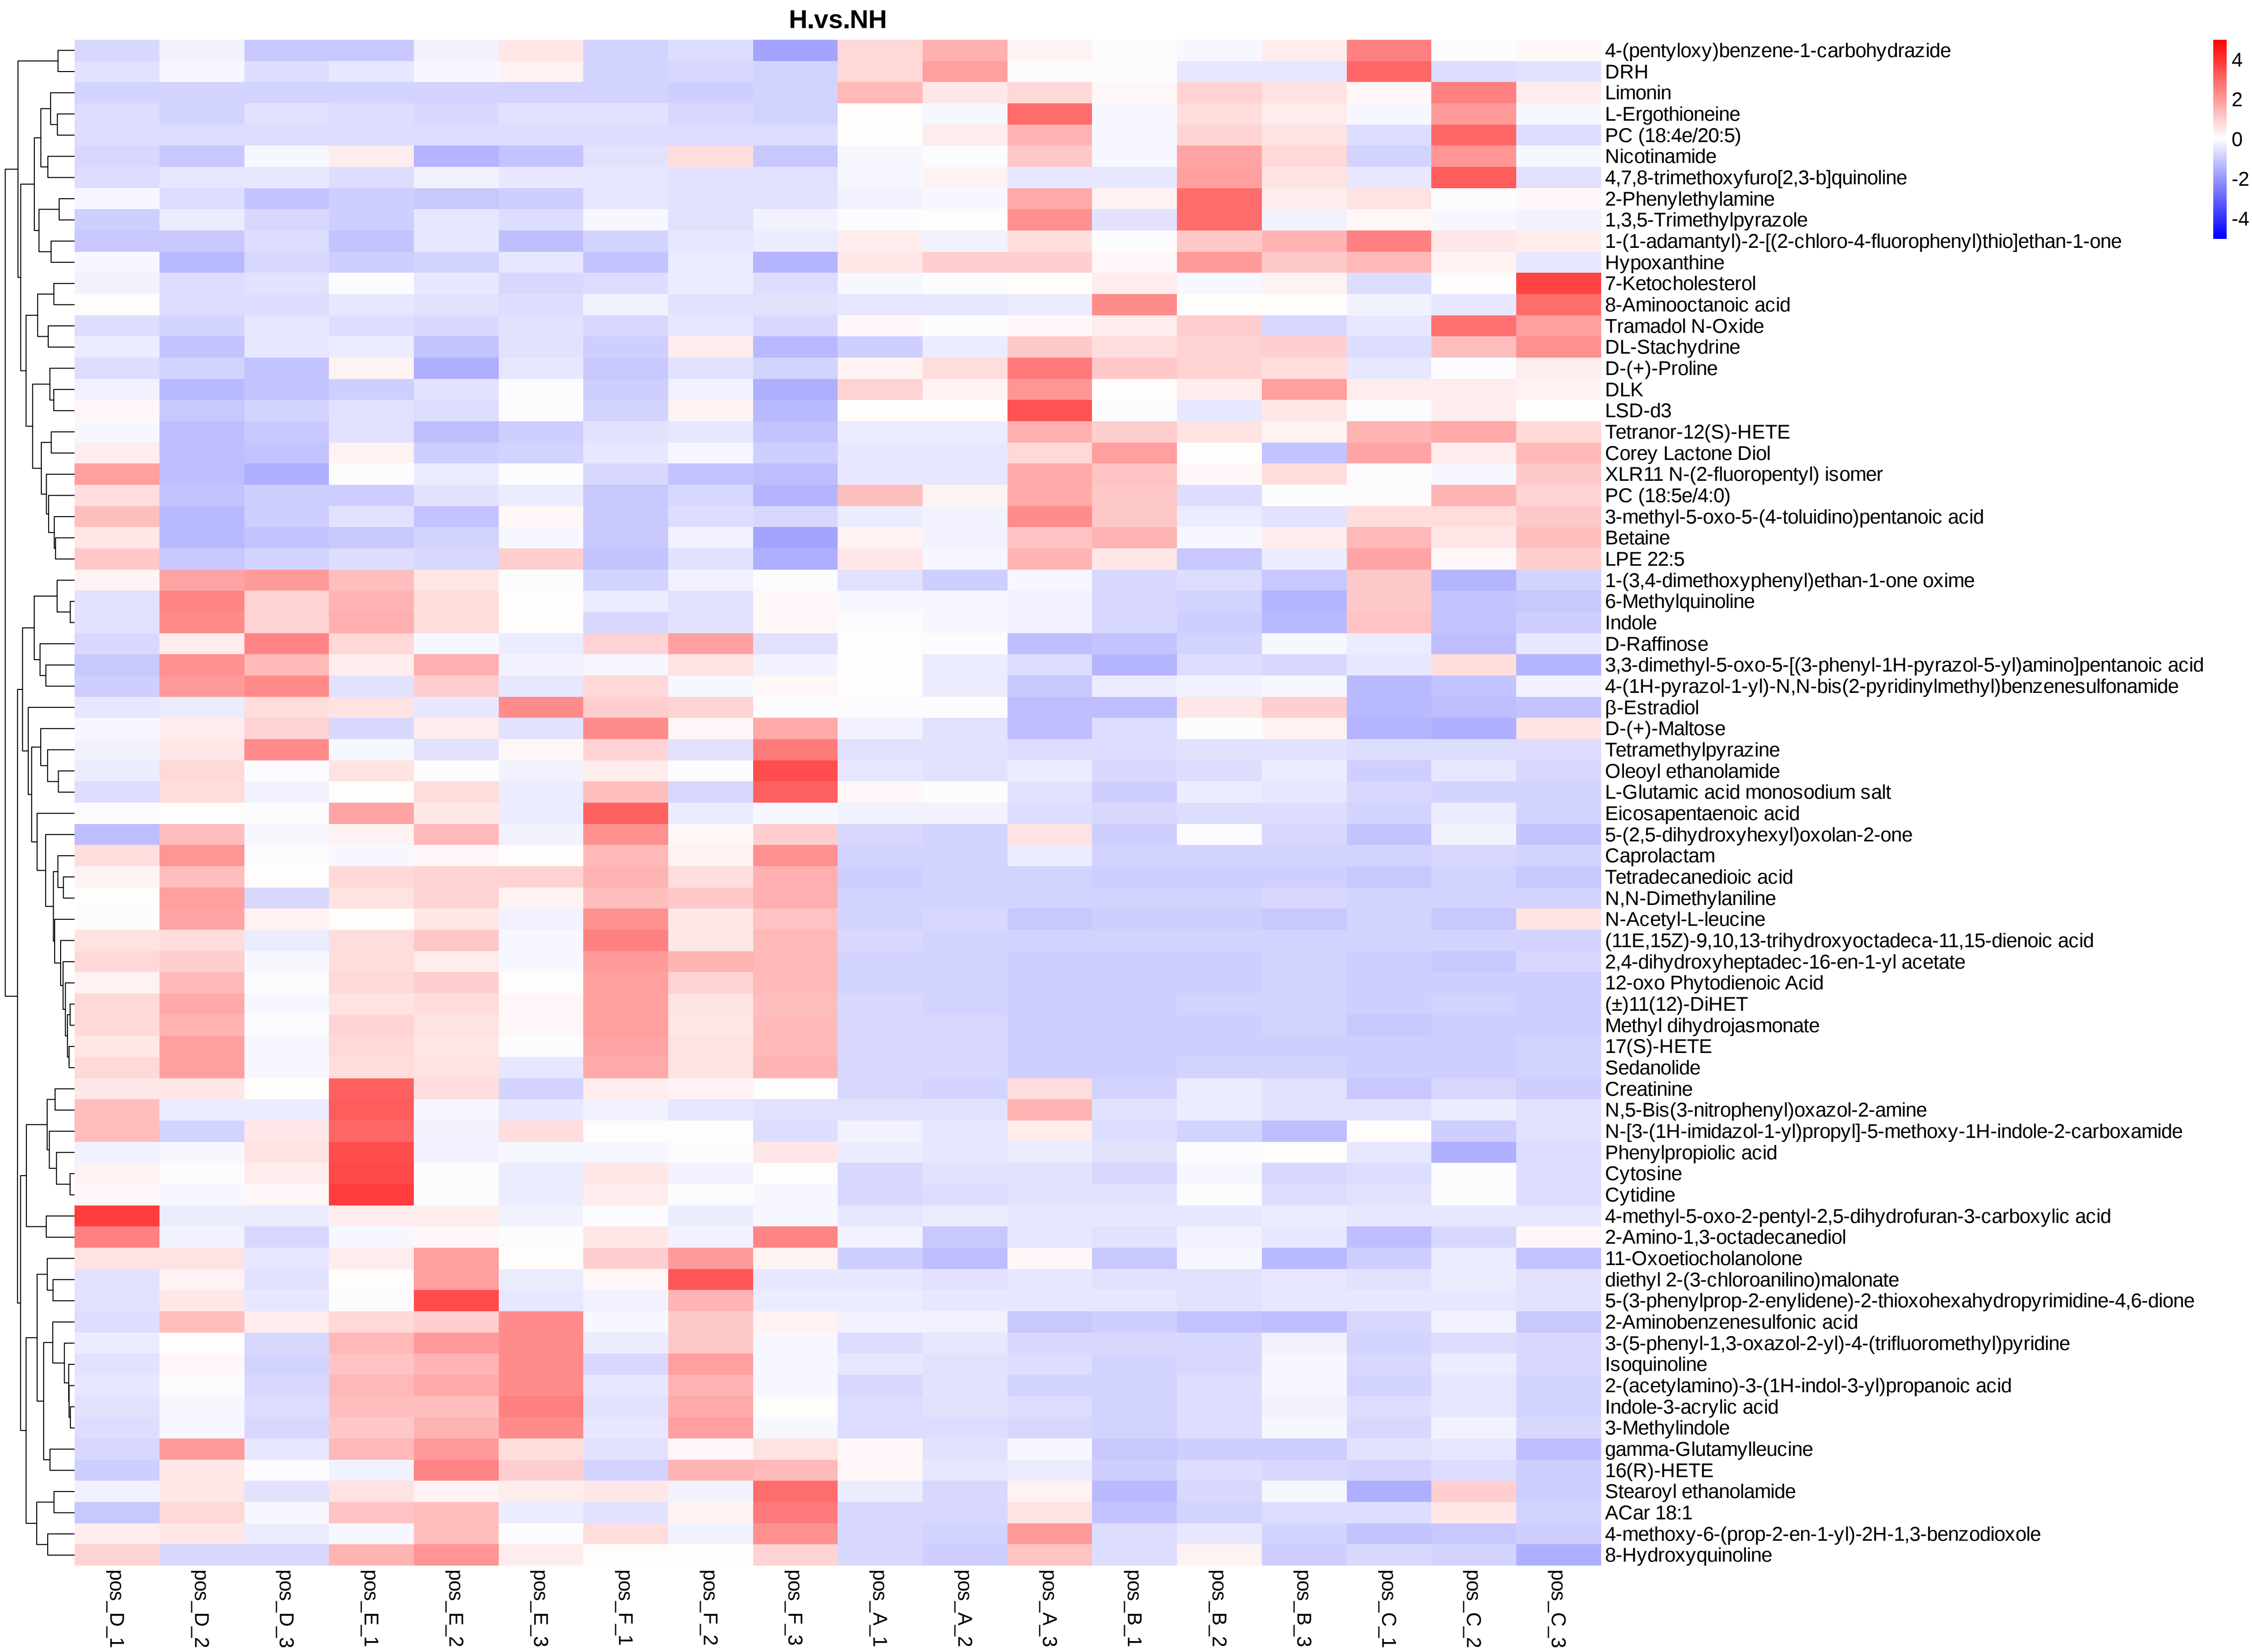

Supplement: RawDataResult.zip [file RawDataResult.zip]

# H.vs.NH

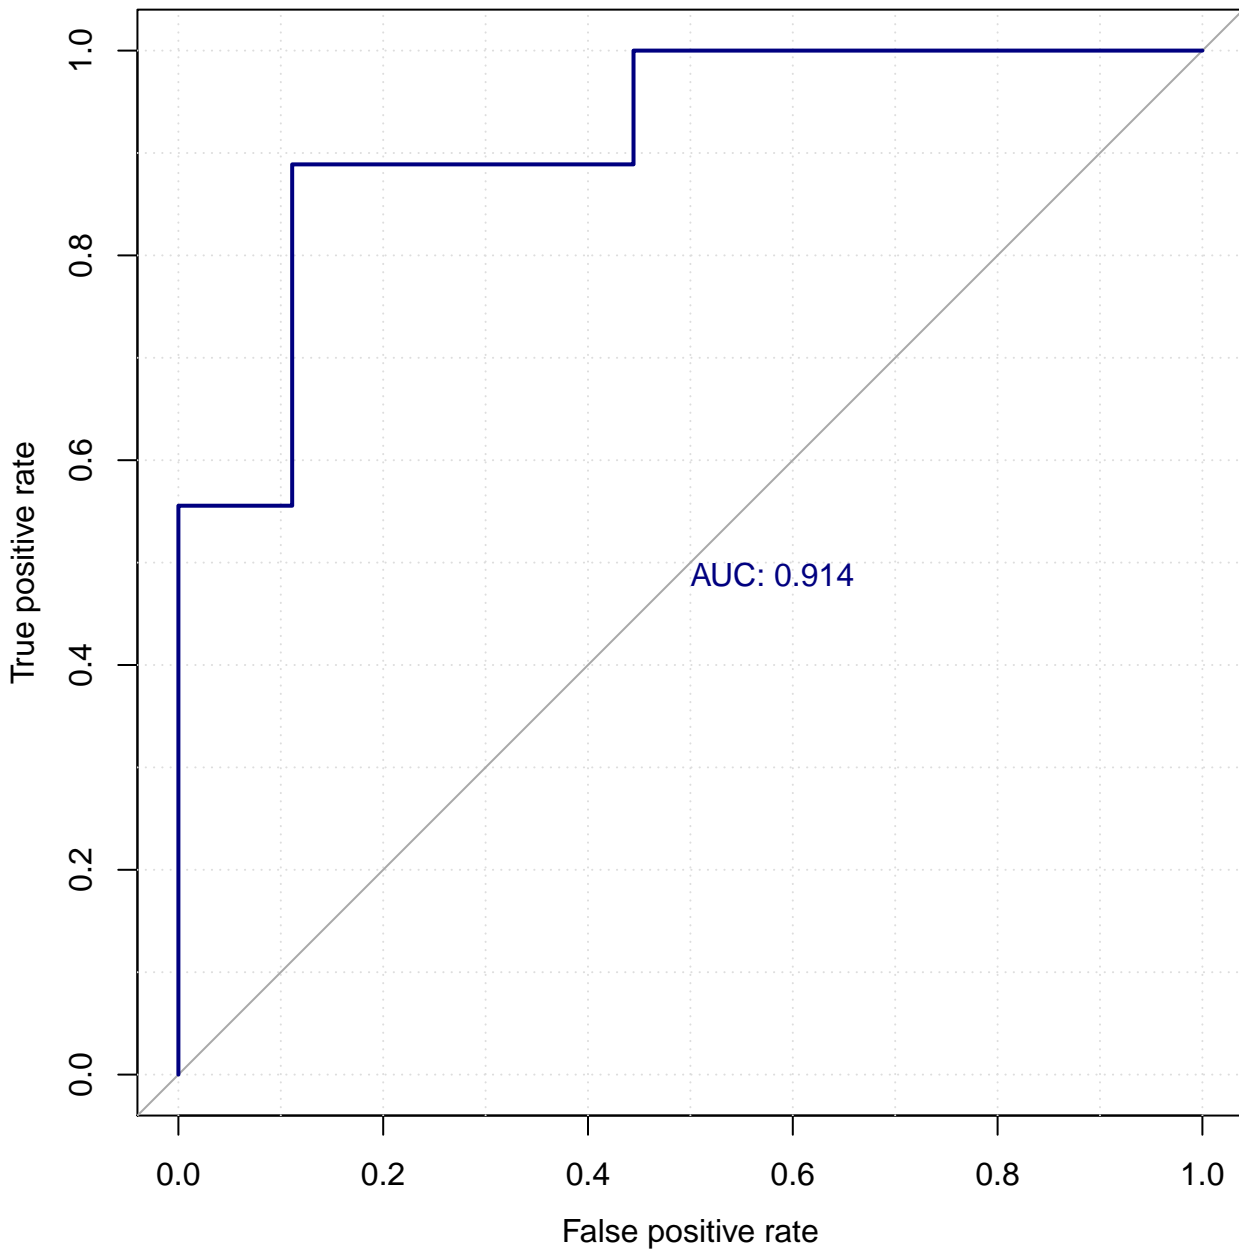

Supplement: RawDataResult.zip [file RawDataResult.zip]

H.vs.NH

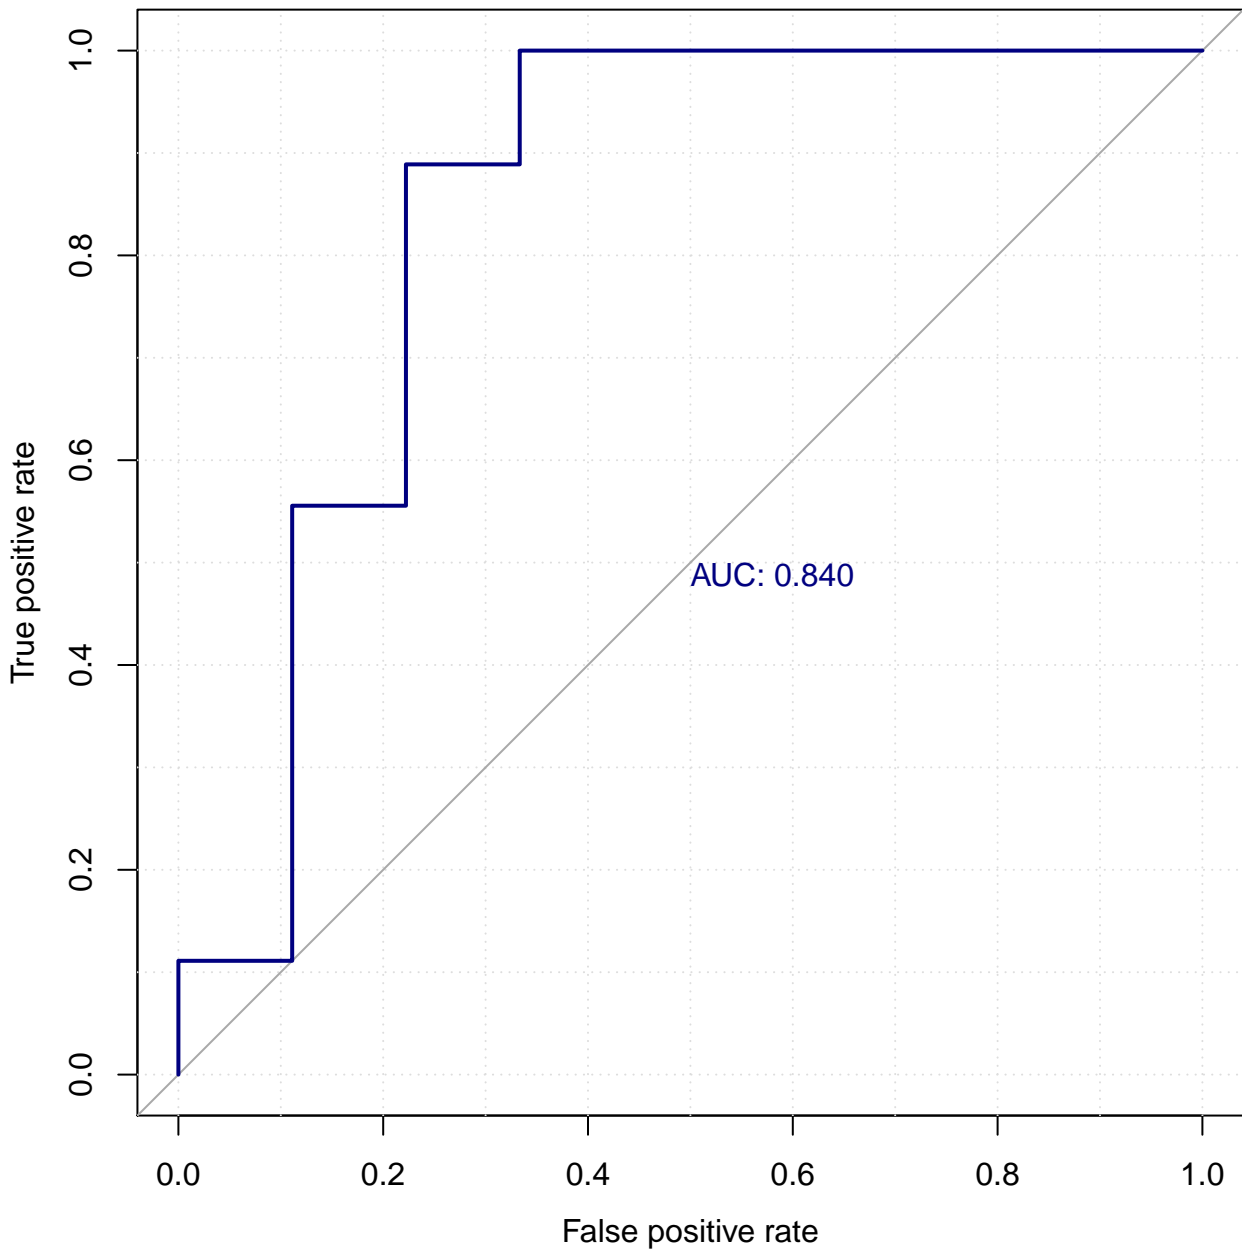

Supplement: RawDataResult.zip [file RawDataResult.zip]

class    ● H    ● NH

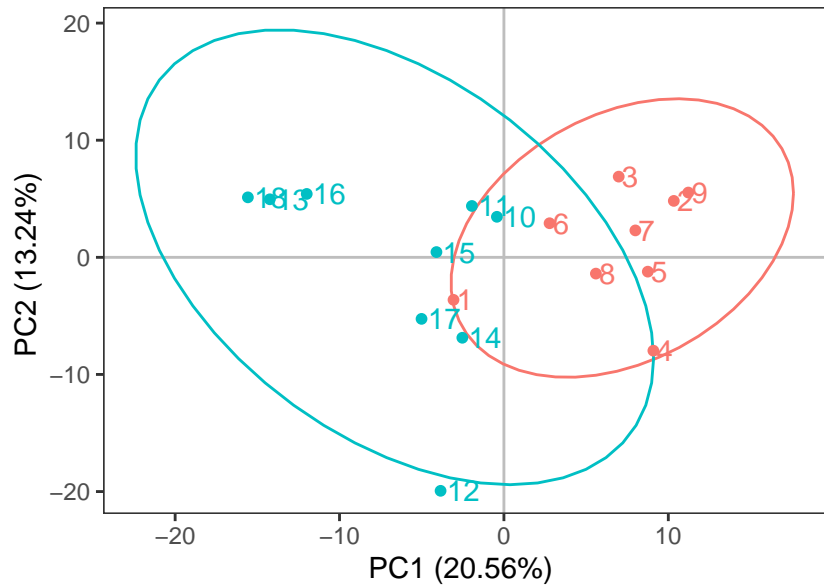

Supplement: RawDataResult.zip [file RawDataResult.zip]

# H.vs.NH

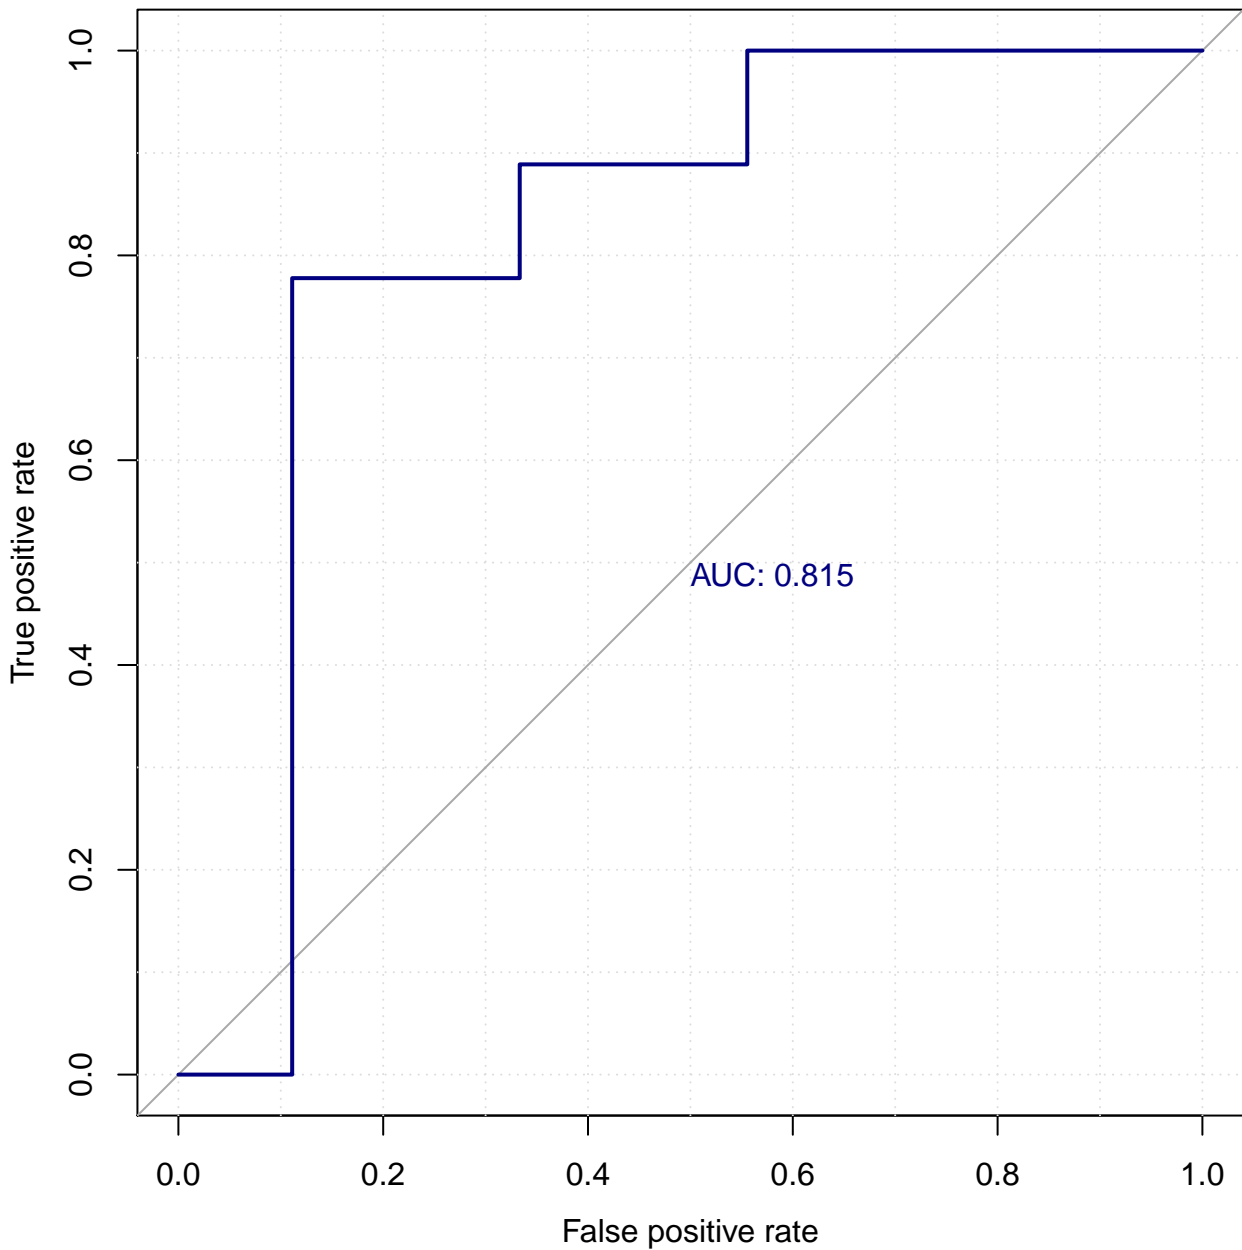

Supplement: RawDataResult.zip [file RawDataResult.zip]

# H.vs.NH

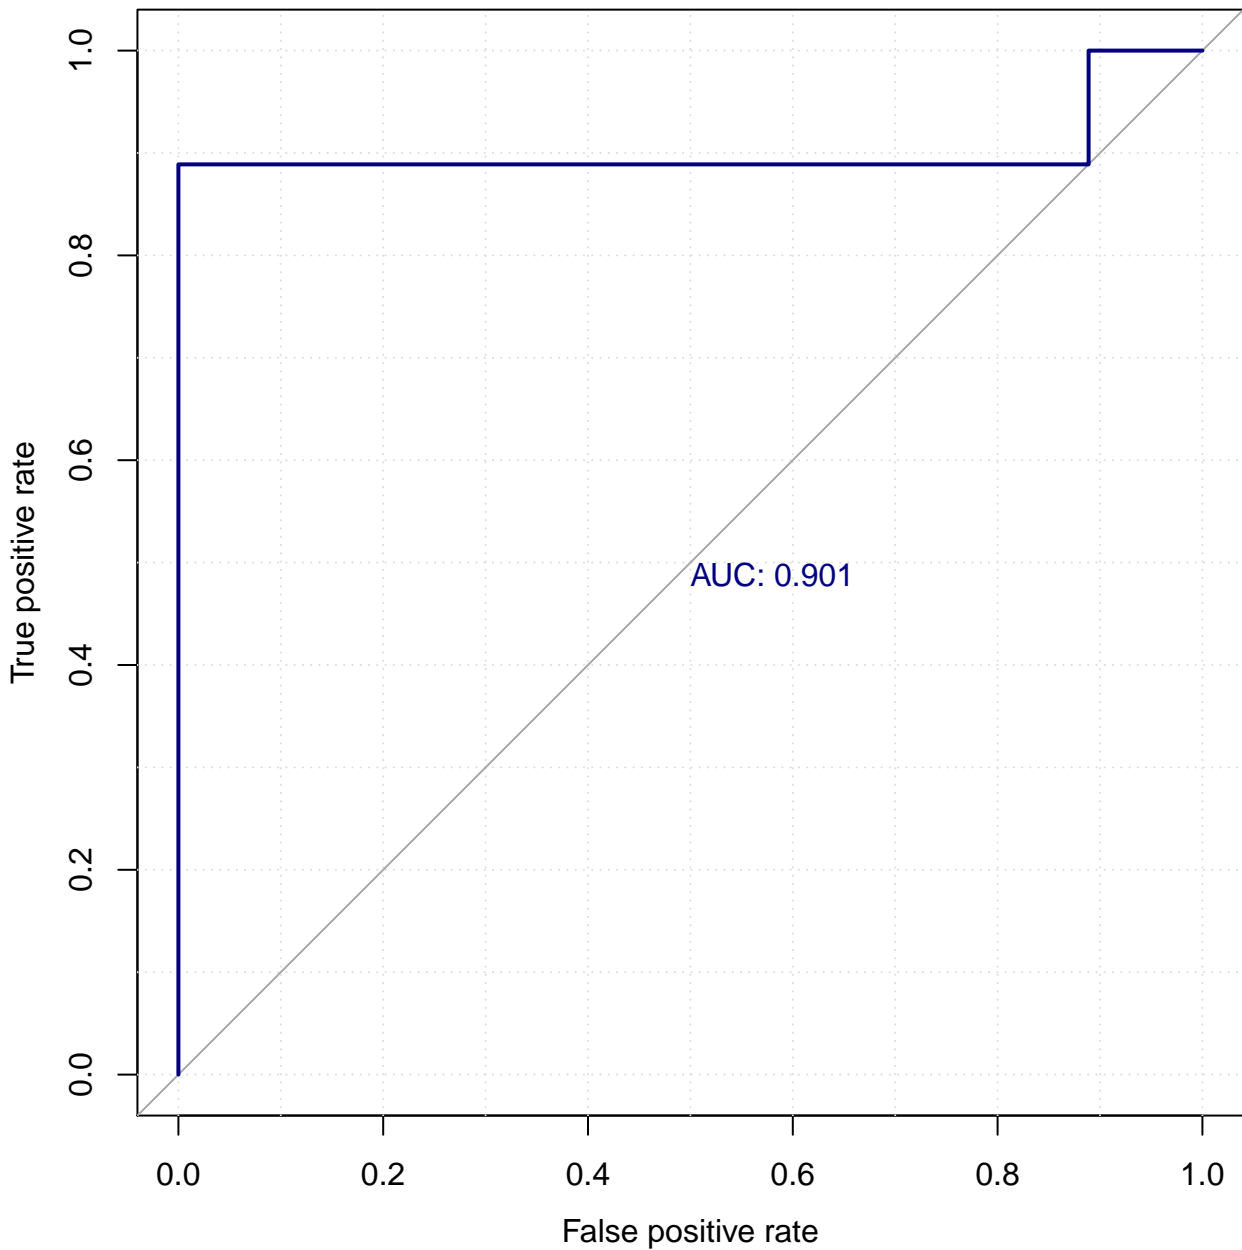

Supplement: RawDataResult.zip [file RawDataResult.zip]

PC2 (13.24%)

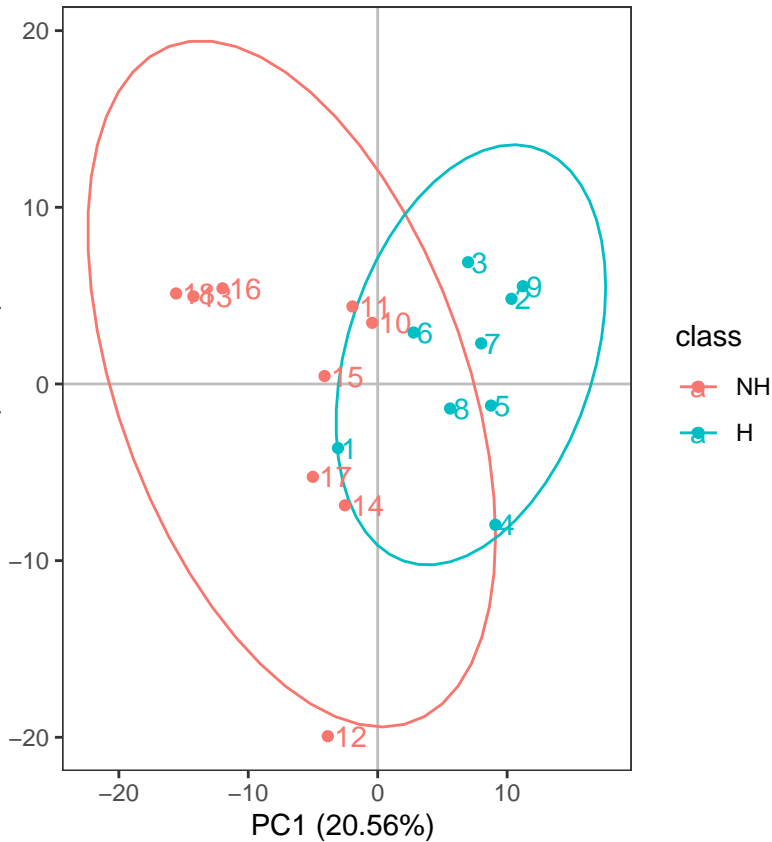

PC1 (20.56%)

Supplement: RawDataResult.zip [file RawDataResult.zip]

# H.vs.NH

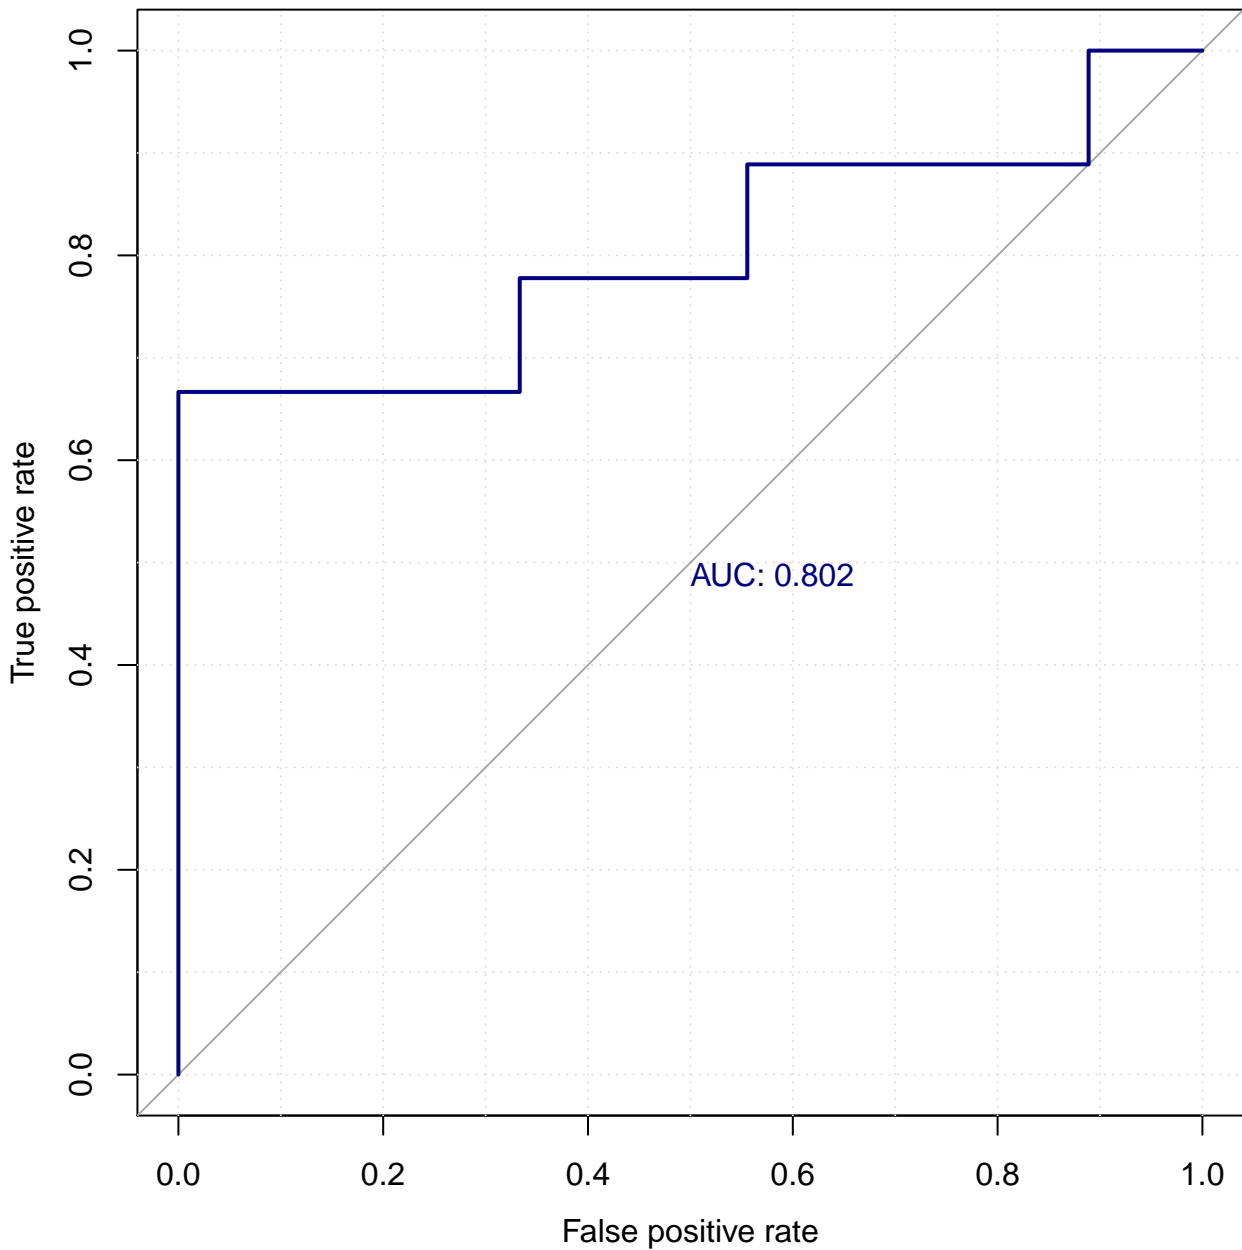

Supplement: RawDataResult.zip [file RawDataResult.zip]

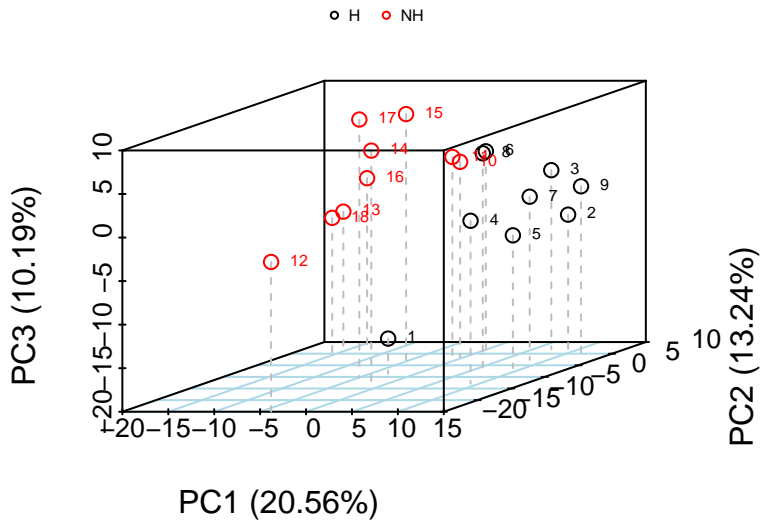

Supplement: RawDataResult.zip [file RawDataResult.zip]

# H.vs.NH

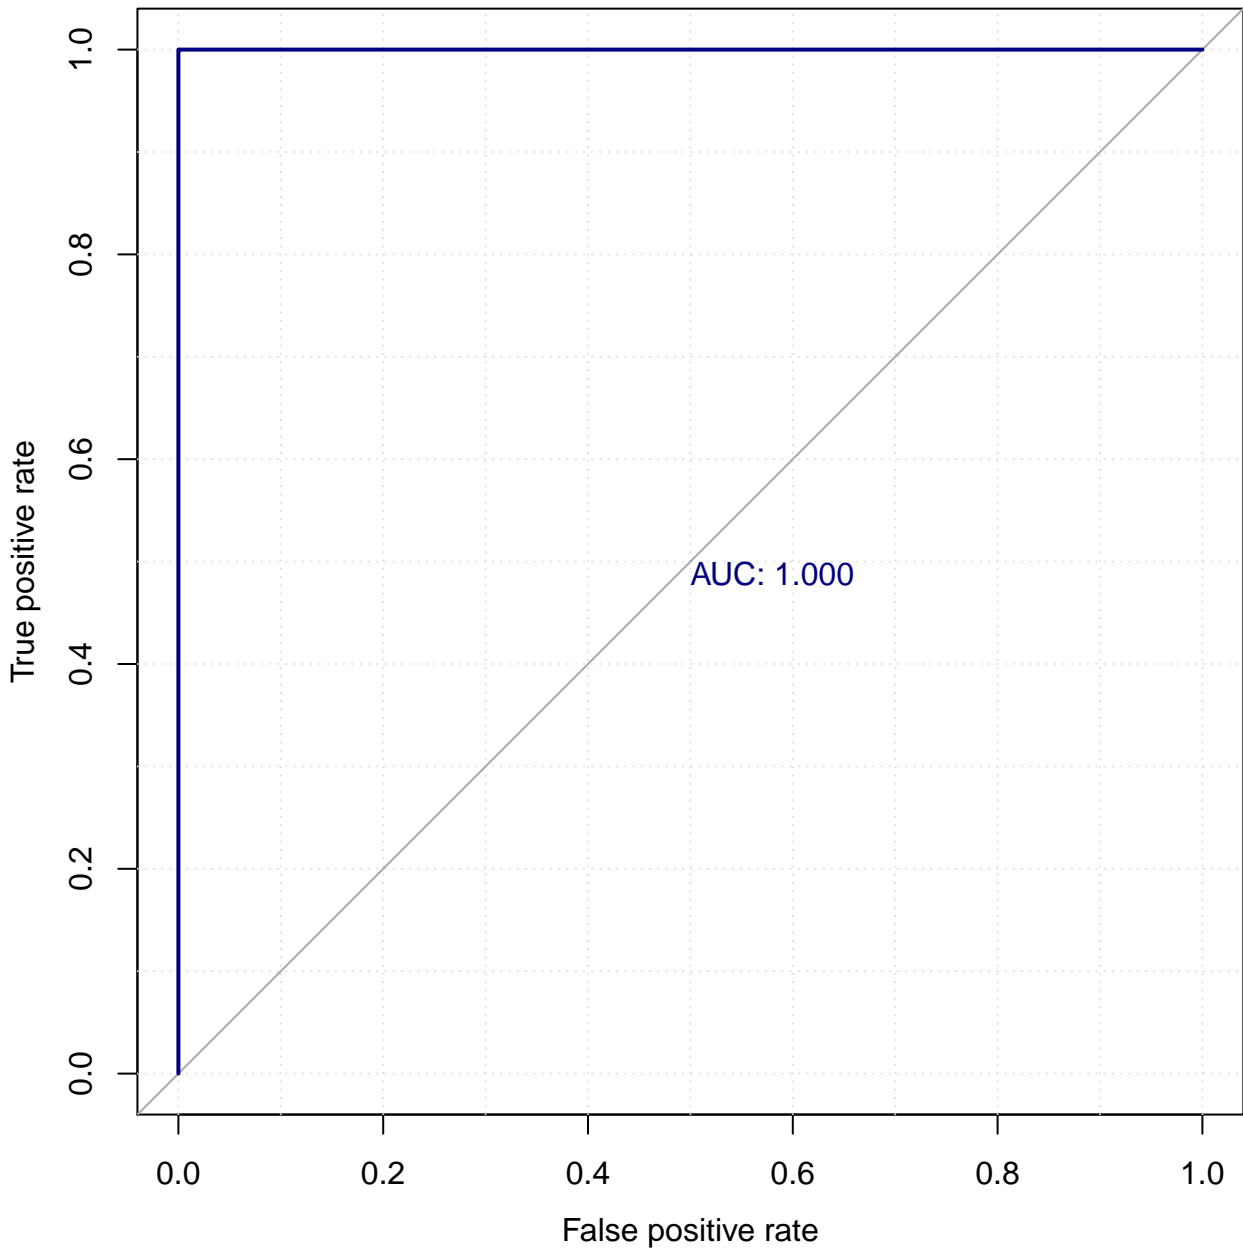

Supplement: RawDataResult.zip [file RawDataResult.zip]

# H.vs.NH

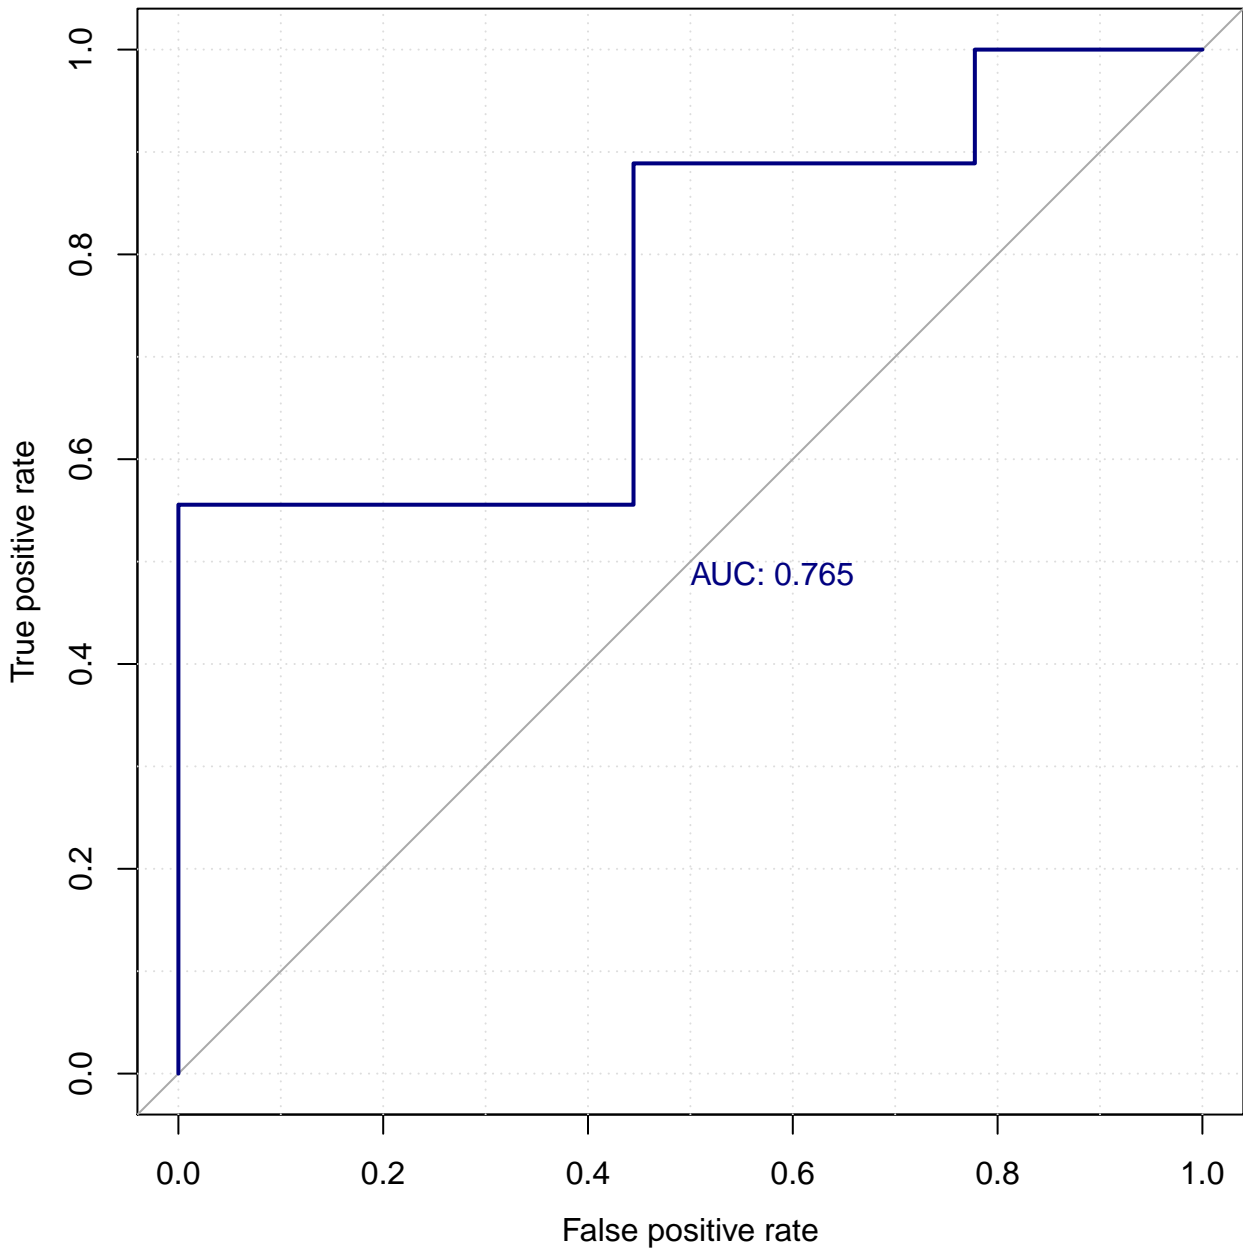

Supplement: RawDataResult.zip [file RawDataResult.zip]

H.vs.NH

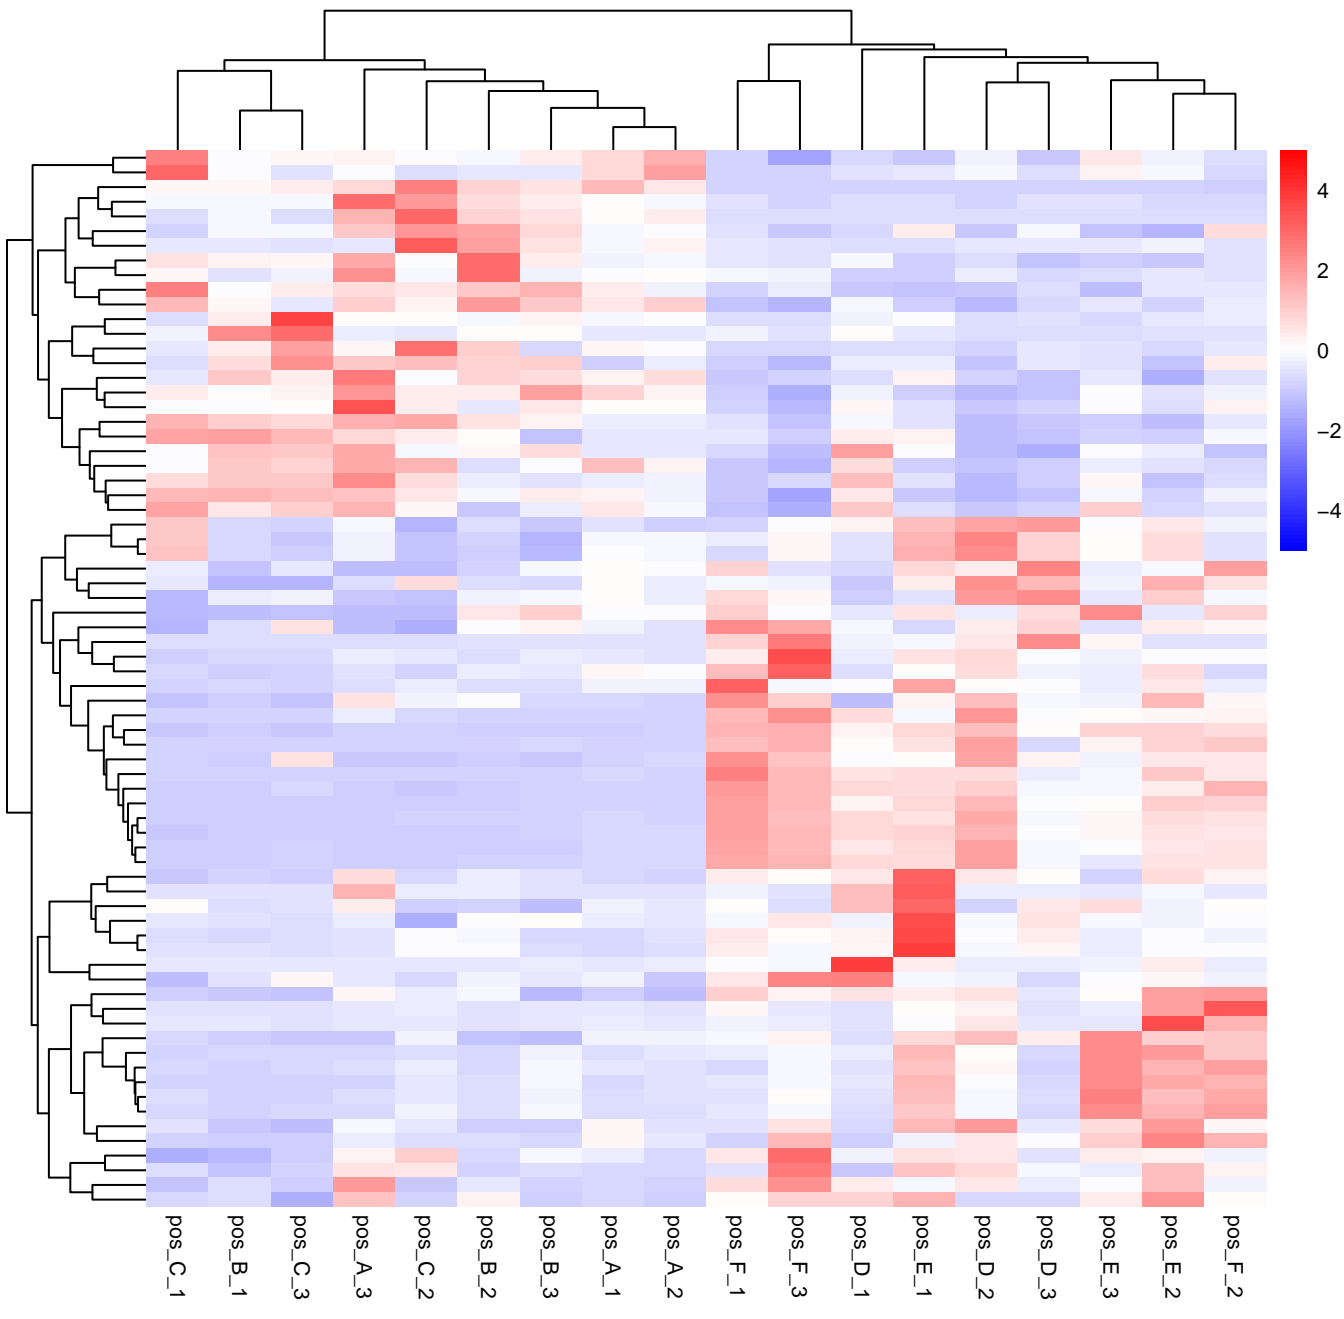

Supplement: RawDataResult.zip [file RawDataResult.zip]

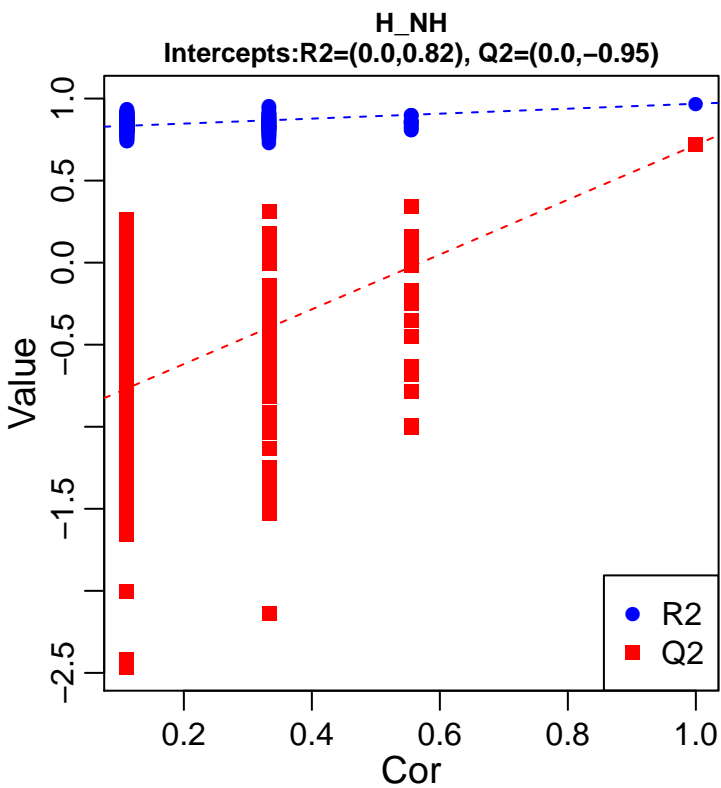

Supplement: RawDataResult.zip [file RawDataResult.zip]
